# Supplementary material for: A general calculus of fitness landscapes finds genes under selection in cancers
Source: HighWire-hosted journal article supplement (doi:10.1101/gr.275811.121), 2022-03-17
Supplement: Supplemental_Table_S4.xlsx [file Supplemental_Table_S4.xlsx]

## Sheet: Table_S4
Table S4. Gold-standard cancer genes
Gene	COSMIC CGC (v79)	Davoli 2013	Lawrence 2014	Kandoth 2013	Vogelstein 2013	Agreement
AKT1	X	X	X	X	X	5
APC	X	X	X	X	X	5
ARID1A	X	X	X	X	X	5
ASXL1	X	X	X	X	X	5
ATM	X	X	X	X	X	5
BAP1	X	X	X	X	X	5
BRAF	X	X	X	X	X	5
BRCA1	X	X	X	X	X	5
CDH1	X	X	X	X	X	5
CDKN2A	X	X	X	X	X	5
CTNNB1	X	X	X	X	X	5
EGFR	X	X	X	X	X	5
EP300	X	X	X	X	X	5
EZH2	X	X	X	X	X	5
FBXW7	X	X	X	X	X	5
FGFR2	X	X	X	X	X	5
GATA3	X	X	X	X	X	5
IDH1	X	X	X	X	X	5
KDM5C	X	X	X	X	X	5
KDM6A	X	X	X	X	X	5
KMT2D	X	X	X	X	X	5
KRAS	X	X	X	X	X	5
MAP3K1	X	X	X	X	X	5
NF1	X	X	X	X	X	5
NFE2L2	X	X	X	X	X	5
NRAS	X	X	X	X	X	5
PBRM1	X	X	X	X	X	5
PIK3CA	X	X	X	X	X	5
PIK3R1	X	X	X	X	X	5
PTEN	X	X	X	X	X	5
RB1	X	X	X	X	X	5
SETD2	X	X	X	X	X	5
SF3B1	X	X	X	X	X	5
SMAD2	X	X	X	X	X	5
SMAD4	X	X	X	X	X	5
STAG2	X	X	X	X	X	5
STK11	X	X	X	X	X	5
TET2	X	X	X	X	X	5
TP53	X	X	X	X	X	5
U2AF1	X	X	X	X	X	5
VHL	X	X	X	X	X	5
AR	X	X		X	X	4
ARID2	X	X	X		X	4
ATRX	X	X		X	X	4
B2M	X	X	X		X	4
BCOR	X	X	X		X	4
CASP8	X	X	X		X	4
CEBPA	X		X	X	X	4
CREBBP	X	X	X		X	4
CTCF	X	X	X	X		4
DNMT3A	X		X	X	X	4
ERBB2	X	X	X		X	4
FGFR3	X		X	X	X	4
FLT3	X		X	X	X	4
HRAS	X	X	X		X	4
IDH2	X		X	X	X	4
KIT	X		X	X	X	4
KMT2C	X		X	X	X	4
MAP2K4	X	X	X	X		4
MYD88	X	X	X		X	4
NCOR1	X		X	X	X	4
NOTCH1	X		X	X	X	4
PHF6	X		X	X	X	4
PPP2R1A	X		X	X	X	4
PTPN11	X		X	X	X	4
SMARCA4	X	X	X		X	4
SMARCB1	X	X	X		X	4
SPOP	X		X	X	X	4
TGFBR2	X	X	X	X		4
WT1	X		X	X	X	4
ACVR1B		X	X	X	X	4
NPM1		X	X	X	X	4
ALK	X		X		X	3
ARID1B	X	X			X	3
AXIN2	X		X	X		3
BRCA2	X			X	X	3
CARD11	X		X		X	3
CDK12	X		X	X		3
CYLD	X	X			X	3
ERBB3	X	X	X			3
FAT1	X	X	X			3
FOXA1	X		X	X		3
FUBP1	X	X			X	3
GNAS	X	X			X	3
HIST1H3B	X		X		X	3
HNF1A	X	X			X	3
KEAP1	X		X	X		3
MAP2K1	X		X		X	3
MED12	X		X		X	3
MEN1	X	X			X	3
MET	X		X		X	3
MLH1	X	X			X	3
MTOR	X		X	X		3
NF2	X	X			X	3
NOTCH2	X	X			X	3
PDGFRA	X			X	X	3
PRDM1	X		X		X	3
PTCH1	X	X			X	3
RAC1	X	X	X			3
RAD21	X		X	X		3
RNF43	X	X			X	3
RPL5	X		X	X		3
SETBP1	X			X	X	3
TBL1XR1	X		X	X		3
TBX3	X		X	X		3
TSC1	X		X		X	3
CDKN1B		X	X	X		3
RUNX1			X	X	X	3
ABL1	X				X	2
ATR	X			X		2
AXIN1	X				X	2
CBL	X				X	2
CD79B	X		X			2
CDC73	X				X	2
CHD4	X		X			2
CIC	X				X	2
CRLF2	X				X	2
CUX1	X		X			2
DAXX	X				X	2
DDX3X	X		X			2
ERBB4	X			X		2
FAM46C	X		X			2
FAS	X	X				2
FOXL2	X				X	2
GATA1	X				X	2
GATA2	X				X	2
GNA11	X				X	2
GNAQ	X				X	2
H3F3A	X				X	2
IL7R	X		X			2
JAK1	X				X	2
JAK2	X				X	2
JAK3	X				X	2
KLF4	X				X	2
MAPK1	X	X				2
MPL	X				X	2
MSH2	X				X	2
MSH6	X				X	2
PAX5	X				X	2
POLE	X		X			2
PPM1D	X		X			2
PPP6C	X		X			2
QKI	X		X			2
RBM10	X		X			2
RET	X				X	2
RHOA	X		X			2
SMO	X				X	2
SPEN	X		X			2
SRSF2	X				X	2
TNFAIP3	X				X	2
TNFRSF14	X		X			2
TRAF7	X				X	2
TSHR	X				X	2
XPO1	X		X			2
ZFHX3	X		X			2
ACVR2A		X		X		2
AJUBA			X	X		2
ARHGAP35			X	X		2
ARID5B			X	X		2
CBFB			X	X		2
CCND1			X	X		2
CDKN1A			X	X		2
CHD8		X	X			2
DNER		X	X			2
ELF3			X	X		2
EPHA2		X	X			2
ERCC2			X	X		2
ING1		X	X			2
KMT2B			X	X		2
MGA		X	X			2
NSD1			X	X		2
PCBP1			X	X		2
RASA1		X	X			2
RIT1		X	X			2
RPL22		X		X		2
SMC1A			X	X		2
SMC3			X	X		2
SOX17			X	X		2
SOX9				X	X	2
TRAF3		X	X			2
ACVR1	X					1
AMER1	X					1
ATP1A1	X					1
BCL6	X					1
BCORL1	X					1
BIRC3	X					1
BTK	X					1
CACNA1D	X					1
CALR	X					1
CBLB	X					1
CNOT3	X					1
COL2A1	X					1
CSF3R	X					1
CXCR4	X					1
DDR2	X					1
DICER1	X					1
DNM2	X					1
DROSHA	X					1
ECT2L	X					1
EPAS1	X					1
ESR1	X					1
ETNK1	X					1
FAT4	X					1
FBXO11	X					1
FGFR4	X					1
GRIN2A	X					1
H3F3B	X					1
HIF1A	X					1
IKBKB	X					1
KCNJ5	X					1
KDR	X					1
KLF6	X					1
LEF1	X					1
LRP1B	X					1
LZTR1	X					1
MAP2K2	X					1
MAX	X					1
MYOD1	X					1
NCOR2	X					1
NFKBIE	X					1
NT5C2	X					1
PHOX2B	X					1
PLCG1	X					1
POT1	X					1
PREX2	X					1
PRKACA	X					1
PRKAR1A	X					1
PTK6	X					1
PTPN13	X					1
PTPRB	X					1
PTPRC	X					1
PTPRT	X					1
RPL10	X					1
SDHA	X					1
SH2B3	X					1
SMAD3	X					1
SMARCD1	X					1
STAT3	X					1
STAT5B	X					1
TP63	X					1
TRRAP	X					1
TSC2	X					1
UBR5	X					1
USP8	X					1
ZRSR2	X					1
ACO1			X			1
ACVR2B			X			1
ADNP			X			1
ALKBH6			X			1
ALPK2			X			1
ANK3			X			1
ANO1		X				1
APOL2			X			1
ASAP1		X				1
ASXL2			X			1
ATP5B			X			1
AZGP1			X			1
B4GALT3				X		1
BAI1		X				1
BCL10		X				1
BCL2					X	1
BCLAF1			X			1
BHMT2			X			1
BRE			X			1
C3orf70			X			1
CAP2			X			1
CAPN5		X				1
CCDC120			X			1
CCDC6			X			1
CD1D			X			1
CD70			X			1
CDC27			X			1
CDK4			X			1
CDKN2C				X		1
CEP76			X			1
CHEK2				X		1
CNBD1			X			1
CNKSR1			X			1
COL14A1		X				1
COL5A1			X			1
COL5A3			X			1
CPA6		X				1
CRIPAK				X		1
CSF1R					X	1
CUL4B			X			1
DDX5			X			1
DENND3		X				1
DHCR7		X				1
DIAPH1			X			1
DIS3			X			1
DNAH12			X			1
DNAJC11		X				1
DNMT1					X	1
EGR3				X		1
EIF2S2			X			1
EIF4A2				X		1
EPHA3				X		1
EPHB6				X		1
EPPK1				X		1
EZH1			X			1
EZR			X			1
FAM123B					X	1
FAM166A			X			1
FGFBP1			X			1
FLG			X			1
FOXA2				X		1
FOXQ1			X			1
FRMD7			X			1
FZD6		X				1
GNA13			X			1
GNB1			X			1
GNPTAB			X			1
GOT1			X			1
GPS2			X			1
GUSB			X			1
H3F3C				X		1
HGF				X		1
HIST1H1C				X		1
HIST1H1E			X			1
HIST1H2BD				X		1
HIST1H4E			X			1
HLA-A			X			1
HLA-B			X			1
HLA-DRB1		X				1
HPS3		X				1
HSP90AB1			X			1
ID3		X				1
INO80		X				1
INPPL1			X			1
INTS12			X			1
IPO7			X			1
IRF4			X			1
IRF6			X			1
ITGB7			X			1
ITPKB			X			1
KCNMB2		X				1
KCNS2		X				1
KCNV1		X				1
KEL			X			1
KLHL8			X			1
KMT2A			X			1
KPNA4		X				1
LCTL			X			1
LELP1		X				1
LIFR				X		1
LRRK2				X		1
MALAT1				X		1
MAP4K3			X			1
MAPK8IP1				X		1
MB21D2		X				1
MBD1			X			1
MCPH1		X				1
MECOM				X		1
MED23			X			1
MICALCL			X			1
MIR142				X		1
MLLT4		X				1
MORC4			X			1
MPO			X			1
MUC17			X			1
MXRA5			X			1
MYB			X			1
MYC		X				1
MYCN			X			1
MYOCD			X			1
NAALADL2		X				1
NAV3				X		1
NBPF1			X			1
NFE2L3				X		1
NMD3		X				1
NTN4			X			1
NUP210L			X			1
ODAM			X			1
OMA1			X			1
OR4A16			X			1
OR52N1			X			1
OSTN		X				1
OTUD7A			X			1
OXR1		X				1
PAPD5			X			1
PDAP1			X			1
PDCD2L			X			1
PDSS2			X			1
PHACTR4		X				1
PIK3CG				X		1
PLCG2			X			1
POLQ				X		1
POU2AF1			X			1
POU2F2			X			1
PRDM5		X				1
PRKCD		X				1
PRKCI		X				1
PRX				X		1
PSMC4		X				1
PSPH		X				1
PTPRK		X				1
RAB40A			X			1
RERE		X				1
RHEB			X			1
RPS15			X			1
RPS2			X			1
RSBN1L			X			1
RSPO2		X				1
RTP1		X				1
RXRA			X			1
SACS			X			1
SELP			X			1
SEPT12			X			1
SEPT14		X				1
SERPINB13			X			1
SETDB1			X			1
SFRS2			X			1
SGK1			X			1
SIN3A				X		1
SIRT4			X			1
SLC1A3			X			1
SLC26A3			X			1
SLC44A3			X			1
SLC4A5			X			1
SNX25			X			1
SOCS1					X	1
SOS1			X			1
SPRED1		X				1
SRC		X				1
STK19			X			1
STX2			X			1
TAF1				X		1
TAP1			X			1
TBC1D12			X			1
TCEB1			X			1
TCF7L2			X			1
TCP11L2			X			1
TDRD10			X			1
THRA		X				1
THUMPD3		X				1
TIMM17A			X			1
TLR4				X		1
TNF			X			1
TP53BP1			X			1
TPX2			X			1
TRA2B		X				1
TRIM23			X			1
TRIP12		X				1
TSHZ2				X		1
TSHZ3				X		1
TTLL9			X			1
TXNDC8			X			1
USP28		X				1
USP9X				X		1
VEZF1				X		1
WASF3			X			1
WIPI1		X				1
WNT11		X				1
WWC2		X				1
XIRP2			X			1
ZC3H13		X				1
ZFP36L1		X				1
ZNF180			X			1
ZNF302		X				1
ZNF471			X			1
ZNF483			X			1
ZNF620			X			1
ZNF750			X			1
ZNRF3		X				1
ZRANB3			X			1
