# Supplementary material for: A general calculus of fitness landscapes finds genes under selection in cancers
Source: HighWire-hosted journal article supplement (doi:10.1101/gr.275811.121), 2022-03-17
Supplement: Supplemental_Table_S5.xlsx [file Supplemental_Table_S5.xlsx]

## Sheet: Table_S5
Table S5. 460 candidate drivers
Gene	Full Name	Type	TSG/OG	Cancer type																					Supporting evidence
				PAN	BLCA	BRCA	CESC	COAD	GBM	HNSC	KIRC	KIRP	LAML	LGG	LIHC	LUAD	LUSC	OV	PRAD	READ	SKCM	STAD	THCA	UCEC	dNdS>1	Link to known	#PubMed return	COSMIC v79	Davoli 2013	Kandoth 2013	Vogelstein 2013	Lawrence 2014
SETD2	SET domain containing 2	enzyme	TSG	X							X	X				X									X	X	105	X	X	X	X	X
NF2	neurofibromin 2	other	TSG	X						X		X													X	X	376	X	X		X
KDM6A	lysine demethylase 6A	enzyme	TSG	X	X							X													X	X	64	X	X	X	X	X
PTEN	phosphatase and tensin homolog	phosphatase	TSG	X		X	X	X	X	X	X			X			X		X	X	X		X	X	X	X	>1000	X	X	X	X	X
NRAS	NRAS proto-oncogene, GTPase	enzyme	OG	X				X					X							X	X		X		X	X	>1000	X	X	X	X	X
BRAF	B-Raf proto-oncogene, serine/threonine kinase	kinase	OG	X				X								X					X		X		X	X	>1000	X	X	X	X	X
HRAS	HRas proto-oncogene, GTPase	enzyme	OG	X						X													X		X	X	>1000	X	X		X	X
JMJD1C	jumonji domain containing 1C	enzyme	TSG																				X		X	X	16
TP53	tumor protein p53	transcription regulator	TSG	X	X	X		X	X	X			X	X	X	X	X	X	X	X	X	X		X	X	X	>1000	X	X	X	X	X
KMT2D	lysine methyltransferase 2D	transcription regulator	TSG	X	X		X			X							X		X					X	X	X	42	X	X	X	X	X
CDK12	cyclin dependent kinase 12	kinase	TSG	X				X										X	X						X	X	30	X		X		X
ATM	ATM serine/threonine kinase	kinase	TSG	X				X			X					X			X						X	X	>1000	X	X	X	X	X
SPOP	speckle type BTB/POZ protein	other	OG	X															X						X	X	69	X		X	X	X
FOXA1	forkhead box A1	transcription regulator	TSG	X		X													X						X	X	364	X		X		X
CDKN1B	cyclin dependent kinase inhibitor 1B	kinase	TSG	X		X													X						X	X	963		X	X		X
ZMYM3	zinc finger MYM-type containing 3	other	TSG																X								8
ARID1A	AT-rich interaction domain 1A	transcription regulator	TSG	X	X	X	X	X			X			X	X	X						X		X	X	X	298	X	X	X	X	X
NF1	neurofibromin 1	other	TSG	X		X			X					X		X		X			X				X	X	766	X	X	X	X	X
IDH1	isocitrate dehydrogenase (NADP(+)) 1, cytosolic	enzyme	OG	X					X				X	X							X				X	X	646	X	X	X	X	X
NOTCH1	notch 1	transcription regulator	TSG	X						X				X			X									X	>1000	X		X	X	X
FUBP1	far upstream element binding protein 1	transcription regulator	TSG	X										X			X								X	X	52	X	X		X
SMARCA4	SWI/SNF related, matrix associated, actin dependent regulator of chromatin, subfamily a, member 4	transcription regulator	TSG	X										X		X										X	298	X	X		X	X
IDH2	isocitrate dehydrogenase (NADP(+)) 2, mitochondrial	enzyme	OG	X									X	X											X	X	270	X		X	X	X
ATRX	ATRX, chromatin remodeler	transcription regulator	TSG	X					X					X											X	X	141	X	X	X	X
CIC	capicua transcriptional repressor	other	OG	X										X											X	X	341	X			X
ZBTB20	zinc finger and BTB domain containing 20	transcription regulator	OG											X													13
NIPBL	NIPBL, cohesin loading factor	transcription regulator	TSG											X												X	14
ARID2	AT-rich interaction domain 2	transcription regulator	TSG	X						X											X	X			X	X	39	X	X		X	X
CTNNB1	catenin beta 1	transcription regulator	OG	X				X							X						X			X	X	X	>1000	X	X	X	X	X
RB1	RB transcriptional corepressor 1	transcription regulator	TSG	X	X	X	X		X	X						X		X			X				X	X	>1000	X	X	X	X	X
CDKN2A	cyclin dependent kinase inhibitor 2A	transcription regulator	TSG	X						X							X				X				X	X	>1000	X	X	X	X	X
PBRM1	polybromo 1	other	TSG	X				X			X										X				X	X	99	X	X	X	X	X
RAC1	ras-related C3 botulinum toxin substrate 1 (rho family, small GTP binding protein Rac1)	enzyme	OG	X						X											X				X	X	>1000	X	X			X
ZFX	zinc finger protein, X-linked	transcription regulator	TSG	X																	X						48
ZNF211	zinc finger protein 211	transcription regulator	OG	X																	X						0
PPP6C	protein phosphatase 6 catalytic subunit	phosphatase	OG	X																	X				X	X	15	X				X
NRIP1	nuclear receptor interacting protein 1	transcription regulator	OG	X																	X				X	X	25
GUSB	glucuronidase beta	enzyme	TSG	X																	X					X	30					X
FAM83B	family with sequence similarity 83 member B	other	TSG	X																	X						6
DDX3X	DEAD-box helicase 3, X-linked	enzyme	OG	X																	X				X	X	62	X				X
DACH1	dachshund family transcription factor 1	transcription regulator	OG	X																	X				X	X	50
COL28A1	collagen type XXVIII alpha 1 chain	other	TSG	X																	X				X	--	2
COL4A4	collagen type IV alpha 4 chain	other	OG	X																	X				X		4
BRD7	bromodomain containing 7	transcription regulator	TSG	X																	X				X	X	47
ARID1B	AT-rich interaction domain 1B	transcription regulator	TSG	X																	X					X	38	X	X		X
KIT	KIT proto-oncogene receptor tyrosine kinase	transmembrane receptor	TSG										X								X					X	>1000	X		X	X	X
ZNF727	zinc finger protein 727	other	OG																		X						0
ZNF668	zinc finger protein 668	transcription regulator	TSG																		X						3
ZBED2	zinc finger BED-type containing 2	other	TSG																		X				X		1
UBE2J2	ubiquitin conjugating enzyme E2 J2	enzyme	TSG																		X						2
TUSC3	tumor suppressor candidate 3	transporter	TSG																		X				X		22
TUBGCP5	tubulin gamma complex associated protein 5	other	TSG																		X						0
TNRC6C	trinucleotide repeat containing 6C	other	TSG																		X						2
TEP1	telomerase associated protein 1	enzyme	OG																		X						117
TIMD4	T-cell immunoglobulin and mucin domain containing 4	other	TSG																		X						11
SOS2	SOS Ras/Rho guanine nucleotide exchange factor 2	other	OG																		X				X	X	19
SLC6A13	solute carrier family 6 member 13	transporter	TSG																		X						1
SLC40A1	solute carrier family 40 member 1	transporter	TSG																		X						12
SLC27A5	solute carrier family 27 member 5	transporter	TSG																		X						4
SPRR3	small proline rich protein 3	other	TSG																		X						15
MST4	serine/threonine kinase 26	other	TSG																		X						21
RPL5	ribosomal protein L5	other	TSG																		X				X	X	42	X		X		X
RGS16	regulator of G protein signaling 16	other	TSG																		X				X	X	22
REG1A	regenerating family member 1 alpha	growth factor	TSG																		X				X		58
RBAK	RB associated KRAB zinc finger	transcription regulator	TSG																		X					--	1
PPP2R2A	protein phosphatase 2 regulatory subunit Balpha	phosphatase	TSG																		X				X		51
GALNTL5	polypeptide N-acetylgalactosaminyltransferase-like 5	enzyme	TSG																		X				X	--	0
PDE10A	phosphodiesterase 10A	enzyme	OG																		X				X		10
PER3	period circadian clock 3	other	TSG																		X						68
OSBPL10	oxysterol binding protein like 10	transporter	TSG																		X						3
OR51A4	olfactory receptor family 51 subfamily A member 4	other	OG																		X					--	0
OR4N2	olfactory receptor family 4 subfamily N member 2	G-protein coupled receptor	TSG																		X					--	0
OR4D5	olfactory receptor family 4 subfamily D member 5	G-protein coupled receptor	TSG																		X					--	0
OR4A15	olfactory receptor family 4 subfamily A member 15	G-protein coupled receptor	TSG																		X					--	0
NPHS2	NPHS2, podocin	other	TSG																		X				X		7
MUC7	mucin 7, secreted	other	TSG																		X				X		22
LIN7A	lin-7 homolog A, crumbs cell polarity complex component	other	OG																		X				X		2
INMT	indolethylamine N-methyltransferase	enzyme	OG																		X						5
GTPBP4	GTP binding protein 4	enzyme	TSG																		X						3
GNAI2	G protein subunit alpha i2	enzyme	TSG																		X						30
FGF6	fibroblast growth factor 6	growth factor	TSG																		X					X	13
FAAH2	fatty acid amide hydrolase 2	enzyme	TSG																		X						2
DYNAP	dynactin associated protein	other	OG																		X					--	2
DMC1	DNA meiotic recombinase 1	enzyme	TSG																		X						61
DDX17	DEAD-box helicase 17	enzyme	TSG																		X				X		20
CYP7B1	cytochrome P450 family 7 subfamily B member 1	enzyme	TSG																		X						14
CFHR4	complement factor H related 4	transporter	TSG																		X				X		0
COL16A1	collagen type XVI alpha 1 chain	other	TSG																		X						5
COL19A1	collagen type XIX alpha 1 chain	other	OG																		X				X		1
COL4A3	collagen type IV alpha 3 chain	other	OG																		X				X		10
C1orf194	chromosome 1 open reading frame 194	other	TSG																		X				X	--	1
CADM4	cell adhesion molecule 4	other	TSG																		X					X	5
CEL	carboxyl ester lipase	enzyme	OG																		X						113
CLEC4M	C-type lectin domain family 4 member M	other	TSG																		X						6
AGTR1	angiotensin II receptor type 1	G-protein coupled receptor	TSG																		X				X	X	50
AK9	adenylate kinase 9	kinase	OG																		X				X	--	2
FBXW7	F-box and WD repeat domain containing 7	transcription regulator	TSG	X	X		X	X		X							X			X				X	X	X	388	X	X	X	X	X
KRAS	KRAS proto-oncogene, GTPase	enzyme	OG	X			X	X								X				X				X	X	X	>1000	X	X	X	X	X
APC	APC, WNT signaling pathway regulator	enzyme	TSG	X				X												X				X	X	X	>1000	X	X	X	X	X
RASA1	RAS p21 protein activator 1	transporter	TSG	X						X							X							X	X	X	36		X			X
MGA	MGA, MAX dimerization protein	transcription regulator	TSG	X												X								X	X	X	43		X			X
PIK3CA	phosphatidylinositol-4,5-bisphosphate 3-kinase catalytic subunit alpha	kinase	OG	X		X	X	X		X														X	X	X	>1000	X	X	X	X	X
CASP8	caspase 8	peptidase	TSG	X			X	X		X														X	X	X	>1000	X	X		X	X
EP300	E1A binding protein p300	transcription regulator	TSG	X	X		X			X														X	X	X	335	X	X	X	X	X
PIK3R1	phosphoinositide-3-kinase regulatory subunit 1	kinase	TSG	X		X		X	X															X	X	X	125	X	X	X	X	X
ZC3H13	zinc finger CCCH-type containing 13	other	TSG	X				X																X	X	X	1		X
ZNF180	zinc finger protein 180	transcription regulator	OG	X																				X	X	X	0					X
SOX17	SRY-box 17	transcription regulator	OG	X																				X		X	106			X		X
SIN3A	SIN3 transcription regulator family member A	transcription regulator	TSG	X																				X	X	X	95			X
RNF43	ring finger protein 43	enzyme	TSG	X																				X	X	X	65	X	X		X
ARHGAP35	Rho GTPase activating protein 35	transcription regulator	TSG	X																				X	X	X	31			X		X
PPP2R1A	protein phosphatase 2 scaffold subunit Aalpha	phosphatase	TSG	X																				X		X	43	X		X	X	X
PGR	progesterone receptor	ligand-dependent nuclear receptor	TSG	X																				X		X	968
MICU3	mitochondrial calcium uptake family member 3	other	OG	X																				X	X		0
MIS12	MIS12, kinetochore complex component	other	TSG	X																				X	X		24
CRYBG3	crystallin beta-gamma domain containing 3	other	TSG	X																				X	X	--	0
CCDC82	coiled-coil domain containing 82	other	OG	X																				X	X	X	0
CCDC73	coiled-coil domain containing 73	other	TSG	X																				X	X	--	0
CTCF	CCCTC-binding factor	transcription regulator	TSG	X		X																		X	X	X	341	X	X	X		X
BMF	Bcl2 modifying factor	other	TSG	X																				X			92
SMAD4	SMAD family member 4	transcription regulator	TSG	X		X		X												X					X	X	>1000	X	X	X	X	X
AMER1	APC membrane recruitment protein 1	other	TSG	X				X												X					X	X	36	X
B2M	beta-2-microglobulin	transmembrane receptor	TSG	X																X					X	X	125	X	X		X	X
KEAP1	kelch like ECH associated protein 1	transcription regulator	OG	X												X	X								X	X	530	X		X		X
NFE2L2	nuclear factor, erythroid 2 like 2	transcription regulator	OG	X			X			X							X								X	X	788	X	X	X	X	X
PPP4R1	protein phosphatase 4 regulatory subunit 1	phosphatase	TSG	X													X										1
PLCL1	phospholipase C like 1	enzyme	OG	X													X								X		0
MSL3	male-specific lethal 3 homolog (Drosophila)	transcription regulator	OG	X													X										0
U2AF1	U2 small nuclear RNA auxiliary factor 1	other	TSG	X									X			X									X	X	51	X	X	X	X	X
EGFR	epidermal growth factor receptor	kinase	OG	X					X							X									X	X	>1000	X	X	X	X	X
STK11	serine/threonine kinase 11	kinase	TSG	X												X									X	X	703	X	X	X	X	X
BAP1	BRCA1 associated protein 1	peptidase	TSG	X			X				X				X										X	X	274	X	X	X	X	X
RUNX1	runt related transcription factor 1	transcription regulator	TSG	X		X							X												X	X	841			X	X	X
DNMT3A	DNA methyltransferase 3 alpha	enzyme	OG	X									X												X	X	506	X		X	X	X
CEBPA	CCAAT/enhancer binding protein alpha	transcription regulator	TSG	X									X													X	219	X		X	X	X
VHL	von Hippel-Lindau tumor suppressor	transcription regulator	TSG	X							X														X	X	>1000	X	X	X	X	X
MTOR	mechanistic target of rapamycin	kinase	OG	X							X														X	X	>1000	X		X		X
KDM5C	lysine demethylase 5C	enzyme	TSG	X							X														X	X	38	X	X	X	X	X
TGFBR2	transforming growth factor beta receptor 2	kinase	TSG	X				X		X															X	X	229	X	X	X		X
FAT1	FAT atypical cadherin 1	other	TSG	X	X		X			X																X	61	X	X			X
MAPK1	mitogen-activated protein kinase 1	kinase	OG	X			X			X															X	X	568	X	X
CREBBP	CREB binding protein	transcription regulator	TSG	X	X					X															X	X	310	X	X		X	X
OR2T35	olfactory receptor family 2 subfamily T member 2	G-protein coupled receptor	TSG	X						X															X		0
NSD1	nuclear receptor binding SET domain protein 1	transcription regulator	TSG	X						X															X	X	61			X		X
HLA-B	major histocompatibility complex, class I, B	transmembrane receptor	TSG	X						X															X	X	350					X
KMT2B	lysine methyltransferase 2B	transcription regulator	TSG	X						X															X	X	10			X		X
EPHA2	EPH receptor A2	kinase	TSG	X						X																X	356		X			X
AJUBA	ajuba LIM protein	transcription regulator	TSG	X						X															X	X	30			X		X
STAG2	stromal antigen 2	transcription regulator	TSG	X	X				X																	X	45	X	X	X	X	X
LZTR1	leucine zipper like transcription regulator 1	transcription regulator	OG	X					X																X	X	6	X
UBQLN2	ubiquilin 2	other	TSG	X				X																	X		7
TGIF1	TGFB induced factor homeobox 1	transcription regulator	TSG	X				X																	X	X	27
SMARCA1	SWI/SNF related, matrix associated, actin dependent regulator of chromatin, subfamily a, member 1	transcription regulator	OG	X				X																	X	X	21
STAU2	staufen double-stranded RNA binding protein 2	other	OG	X				X																	X		1
SOX9	SRY-box 9	transcription regulator	TSG	X				X																	X	X	360			X	X
ARHGAP5	Rho GTPase activating protein 5	enzyme	OG	X				X																	X	X	42
CCDC66	coiled-coil domain containing 66	other	TSG	X				X																	X		0
ACVR2A	activin A receptor type 2A	kinase	TSG	X				X																	X	X	18		X	X
KMT2C	lysine methyltransferase 2C	transcription regulator	TSG	X		X	X																		X	X	18	X		X	X	X
KLF5	Kruppel like factor 5	transcription regulator	OG	X	X																				X	X	148
ASXL2	additional sex combs like 2, transcriptional regulator	other	TSG	X	X																				X	X	21					X
ZNF814	zinc finger protein 814	other	OG	X																							0
ZFP36L1	ZFP36 ring finger protein like 1	transcription regulator	TSG	X		X																				X	17		X
WNK3	WNK lysine deficient protein kinase 3	kinase	TSG	X																					X		3
WT1	Wilms tumor 1	transcription regulator	TSG	X																						X	>1000	X		X	X	X
VPS13C	vacuolar protein sorting 13 homolog C	other	TSG	X																					X		2
USP9X	ubiquitin specific peptidase 9, X-linked	peptidase	TSG	X																						X	57			X
USP28	ubiquitin specific peptidase 28	peptidase	TSG	X																					X	X	25		X
TP53BP1	tumor protein p53 binding protein 1	transcription regulator	TSG	X																					X	X	295					X
TTK	TTK protein kinase	kinase	TSG	X																					X		202
TNRC6B	trinucleotide repeat containing 6B	other	TSG	X																							6
TM9SF3	transmembrane 9 superfamily member 3	transporter	TSG	X																					X		4
TCF12	transcription factor 12	transcription regulator	TSG	X																					X	X	32
THRAP3	thyroid hormone receptor associated protein 3	transcription regulator	TSG	X																							8
TAF4	TATA-box binding protein associated factor 4	transcription regulator	TSG	X																							18
TAF1	TATA-box binding protein associated factor 1	transcription regulator	OG	X																					X	X	23			X
TARBP2	TARBP2, RISC loading complex RNA binding subunit	other	TSG	X		X																			X		24
TBX3	T-box 3	transcription regulator	TSG	X		X																			X	X	80	X		X		X
SMARCA2	SWI/SNF related, matrix associated, actin dependent regulator of chromatin, subfamily a, member 2	transcription regulator	TSG	X																					X	X	114
SMARCC2	SWI/SNF related, matrix associated, actin dependent regulator of chromatin subfamily c member 2	transcription regulator	TSG	X																					X	X	11
STOML1	stomatin like 1	other	TSG	X																					X		3
SLC25A30	solute carrier family 25 member 30	other	TSG	X																							0
SLC25A2	solute carrier family 25 member 2	transporter	OG	X																					X		0
SLC16A10	solute carrier family 16 member 10	transporter	TSG	X																							3
SMTN	smoothelin	other	OG	X																					X		9
SMAD2	SMAD family member 2	transcription regulator	TSG	X																					X	X	>1000	X	X	X	X	X
SHISA4	shisa family member 4	other	TSG	X																						--	0
SRSF4	serine and arginine rich splicing factor 4	other	TSG	X																						X	6
RBM46	RNA binding motif protein 46	other	TSG	X																					X		0
RPL22	ribosomal protein L22	other	TSG	X																					X	X	49		X	X
RTKN2	rhotekin 2	other	TSG	X																							2
RBP1	retinol binding protein 1	transporter	OG	X																					X	X	55
RGS22	regulator of G protein signaling 22	other	TSG	X																					X		3
RLF	rearranged L-myc fusion	transcription regulator	TSG	X																							32
RHEB	Ras homolog enriched in brain	enzyme	OG	X																					X	X	177					X
RGL2	ral guanine nucleotide dissociation stimulator like 2	other	OG	X																					X	X	10
PPM1D	protein phosphatase, Mg2+/Mn2+ dependent 1D	phosphatase	TSG	X																						X	146	X				X
PPP2R2B	protein phosphatase 2 regulatory subunit Bbeta	phosphatase	OG	X																							15
PRR5L	proline rich 5 like	other	TSG	X																							2
POU4F1	POU class 4 homeobox 1	transcription regulator	OG	X																							20
KCTD3	potassium channel tetramerization domain containing 3	ion channel	TSG	X																					X		0
GALNT7	polypeptide N-acetylgalactosaminyltransferase 7	enzyme	TSG	X																					X		9
PCGF2	polycomb group ring finger 2	transcription regulator	OG	X																						X	26
PNISR	PNN interacting serine and arginine rich protein	other	TSG	X																					X	X	0
PSIP1	PC4 and SFRS1 interacting protein 1	transcription regulator	TSG	X																					X	X	31
PACRG	parkin coregulated	other	TSG	X																							5
PNMA3	paraneoplastic Ma antigen 3	other	TSG	X																							0
OR13D1	olfactory receptor family 13 subfamily D member 1	G-protein coupled receptor	OG	X																						--	0
OLAH	oleoyl-ACP hydrolase	enzyme	TSG	X																						--	103
NR1D2	nuclear receptor subfamily 1 group D member 2	ligand-dependent nuclear receptor	TSG	X																							9
NONO	non-POU domain containing, octamer-binding	other	OG	X																					X		45
NOSTRIN	nitric oxide synthase trafficking	transcription regulator	OG	X																							4
NTM	neurotrimin	other	TSG	X																					X		16
NTS	neurotensin	other	TSG	X																					X		109
NPTXR	neuronal pentraxin receptor	transmembrane receptor	TSG	X																					X		1
NDUFA5	NADH:ubiquinone oxidoreductase subunit A5	enzyme	TSG	X																					X		5
NDUFA10	NADH:ubiquinone oxidoreductase subunit A10	transporter	OG	X																					X		2
NAA15	N(alpha)-acetyltransferase 15, NatA auxiliary subunit	transcription regulator	TSG	X																							2
MDFIC	MyoD family inhibitor domain containing	other	TSG	X																					X		1
MAX	MYC associated factor X	transcription regulator	TSG	X																					X	X	>1000	X
MYBL1	MYB proto-oncogene like 1	transcription regulator	TSG	X																					X		29
MLH1	mutL homolog 1	enzyme	TSG	X																						X	>1000	X	X		X
MSX2	msh homeobox 2	transcription regulator	TSG	X																					X	X	74
MAP3K1	mitogen-activated protein kinase kinase kinase 1	kinase	TSG	X		X																			X	X	234	X	X	X	X	X
MAP2K4	mitogen-activated protein kinase kinase 4	kinase	TSG	X		X																			X	X	158	X	X	X		X
MTFR1L	mitochondrial fission regulator 1 like	other	TSG	X																							0
MEX3D	mex-3 RNA binding family member D	other	TSG	X																							2
MEX3C	mex-3 RNA binding family member C	other	OG	X																							2
MEPCE	methylphosphate capping enzyme	enzyme	OG	X																					X		3
MEN1	menin 1	transcription regulator	TSG	X																						X	469	X	X		X
MARCH11	membrane associated ring-CH-type finger 11	other	OG	X																					X	--	0
MKL1	megakaryoblastic leukemia (translocation) 1	transcription regulator	TSG	X																					X	X	71
KMT2A	lysine methyltransferase 2A	transcription regulator	TSG	X																					X	X	36					X
LUC7L2	LUC7 like 2, pre-mRNA splicing factor	other	TSG	X																					X		1
LSM11	LSM11, U7 small nuclear RNA associated	other	TSG	X																					X		2
LNP1	leukemia NUP98 fusion partner 1	other	TSG	X																						--	0
LMAN1	lectin, mannose binding 1	other	TSG	X																					X		9
LCA5L	LCA5L, lebercilin like	other	TSG	X																							0
LAMTOR2	late endosomal/lysosomal adaptor, MAPK and MTOR activator 2	other	OG	X																							5
LARP4B	La ribonucleoprotein domain family member 4B	other	TSG	X																					X		2
KLF3	Kruppel like factor 3	transcription regulator	TSG	X																							4
KIAA0907	KIAA0907	other	OG	X																					X		1
JAK2	Janus kinase 2	kinase	TSG	X																					X	X	>1000	X			X
JAK1	Janus kinase 1	kinase	TSG	X																					X	X	564	X			X
IQCJ-SCHIP1	IQCJ-SCHIP1 readthrough	other	TSG	X																						X	0
IRF2	interferon regulatory factor 2	transcription regulator	TSG	X																					X		57
HRASLS	HRAS like suppressor	enzyme	TSG	X																					X	--	14
HOXB9	homeobox B9	transcription regulator	TSG	X																							39
HOXB7	homeobox B7	transcription regulator	TSG	X																						X	71
HIST1H2BI	histone cluster 1 H2B family member i	other	TSG	X																							1
HRCT1	histidine rich carboxyl terminus 1	other	TSG	X																					X	--	0
HS6ST1	heparan sulfate 6-O-sulfotransferase 1	enzyme	OG	X		X																			X		4
HPGDS	hematopoietic prostaglandin D synthase	enzyme	TSG	X																					X		6
HAX1	HCLS1 associated protein X-1	other	OG	X																					X		40
GCC2	GRIP and coiled-coil domain containing 2	other	TSG	X																					X	X	2
GIGYF2	GRB10 interacting GYF protein 2	other	TSG	X																							5
GNAS	GNAS complex locus	enzyme	OG	X																					X	X	158	X	X		X
LGALS2	galectin 2	other	TSG	X																					X		3
GPRASP1	G protein-coupled receptor associated sorting protein 1	transporter	TSG	X																							3
GPS2	G protein pathway suppressor 2	transcription regulator	TSG	X		X																			X	X	12					X
FOXP1	forkhead box P1	other	TSG	X																							126
FAM98C	family with sequence similarity 98 member C	other	OG	X																					X		0
FBXL17	F-box and leucine rich repeat protein 17	other	OG	X																					X		3
EIF2S2	eukaryotic translation initiation factor 2 subunit beta	translation regulator	TSG	X																					X	X	3					X
EIF1AX	eukaryotic translation initiation factor 1A, X-linked	translation regulator	OG	X																					X		18
EEF1A1	eukaryotic translation elongation factor 1 alpha 1	translation regulator	OG	X																					X		66
DCDC2	doublecortin domain containing 2	other	TSG	X																							2
DENND6A	DENN domain containing 6A	other	TSG	X																					X		0
CPEB2	cytoplasmic polyadenylation element binding protein 2	translation regulator	TSG	X																					X		4
CBFB	core-binding factor beta subunit	transcription regulator	OG	X		X																			X	X	95			X		X
COL8A1	collagen type VIII alpha 1 chain	other	OG	X																					X		5
CCDC140	coiled-coil domain containing 140	other	TSG	X																					X	--	1
CLOCK	clock circadian regulator	transcription regulator	TSG	X																					X		548
C6orf223	chromosome 6 open reading frame 223	other	TSG	X																						--	2
CHD8	chromodomain helicase DNA binding protein 8	enzyme	OG	X																					X	X	17		X			X
CHD4	chromodomain helicase DNA binding protein 4	enzyme	TSG	X																					X	X	51	X				X
CHEK2	checkpoint kinase 2	kinase	TSG	X																						X	947			X
CEP19	centrosomal protein 19	other	TSG	X																					X		0
CETN3	centrin 3	other	TSG	X																					X		3
CCAR1	cell division cycle and apoptosis regulator 1	transcription regulator	TSG	X																					X		27
CCPG1	cell cycle progression 1	other	TSG	X																						--	3
CD58	CD58 molecule	transmembrane receptor	TSG	X																					X		116
RQCD1	CCR4-NOT transcription complex subunit 9	other	OG	X																						--	2
CNOT4	CCR4-NOT transcription complex subunit 4	enzyme	TSG	X																					X		2
CNOT3	CCR4-NOT transcription complex subunit 3	other	TSG	X																						X	4	X
CA13	carbonic anhydrase 13	enzyme	TSG	X																							13
CDH1	cadherin 1	other	TSG	X		X																			X	X	>1000	X	X	X	X	X
BRCA2	BRCA2, DNA repair associated	transcription regulator	TSG	X																					X	X	>1000	X		X	X
BCL2L11	BCL2 like 11	other	TSG	X																					X	--	629
ATRNL1	attractin like 1	other	TSG	X																							1
AGBL5	ATP/GTP binding protein like 5	peptidase	TSG	X																					X	--	0
ABCB5	ATP binding cassette subfamily B member 5	transporter	TSG	X																					X		69
ABCB1	ATP binding cassette subfamily B member 1	transporter	TSG	X																					X		>1000
DARS	aspartyl-tRNA synthetase	enzyme	TSG	X																							3
ASH1L	ASH1 like histone lysine methyltransferase	transcription regulator	TSG	X																					X		21
ARMCX3	armadillo repeat containing, X-linked 3	other	TSG	X																						--	0
ASB11	ankyrin repeat and SOCS box containing 11	transcription regulator	OG	X																					X		2
ANGPTL6	angiopoietin like 6	other	TSG	X																					X		4
AMOT	angiomotin	other	TSG	X																							45
AMY2A	amylase, alpha 2A (pancreatic)	enzyme	TSG	X																					X		5
ADH4	alcohol dehydrogenase 4 (class II), pi polypeptide	enzyme	TSG	X																							11
ACVR1B	activin A receptor type 1B	kinase	OG	X																					X	X	36		X	X	X	X
ATF7IP	activating transcription factor 7 interacting protein	transcription regulator	OG	X																					X	X	11
ABL2	ABL proto-oncogene 2, non-receptor tyrosine kinase	kinase	TSG	X																					X	--	37
ZRANB3	zinc finger RANBP2-type containing 3	enzyme	TSG																					X		X	4					X
ZNF75D	zinc finger protein 75D	other	TSG																					X			0
ZNF471	zinc finger protein 471	other	OG																					X	X	X	1					X
USP46	ubiquitin specific peptidase 46	peptidase	TSG																					X			8
TROVE2	TROVE domain family member 2	other	TSG																					X			12
TLE1	transducin like enhancer of split 1	transcription regulator	TSG																					X	X	X	52
TFDP1	transcription factor Dp-1	transcription regulator	TSG																					X			67
TBC1D4	TBC1 domain family member 4	other	TSG																					X			10
RUNX2	runt related transcription factor 2	transcription regulator	TSG																					X		X	433
REV3L	REV3 like, DNA directed polymerase zeta catalytic subunit	enzyme	OG																					X	X		32
RIF1	replication timing regulatory factor 1	other	TSG																					X	X		55
RBBP6	RB binding protein 6, ubiquitin ligase	enzyme	TSG																					X	X		18
PTPN14	protein tyrosine phosphatase, non-receptor type 14	phosphatase	TSG																					X		X	26
PTPN12	protein tyrosine phosphatase, non-receptor type 12	phosphatase	TSG																					X	X	X	45
PSMC6	proteasome 26S subunit, ATPase 6	peptidase	TSG																					X	X		0
PLEKHA5	pleckstrin homology domain containing A5	other	TSG																					X			2
PCLO	piccolo presynaptic cytomatrix protein	transporter	TSG																					X	X	--	5
PPIG	peptidylprolyl isomerase G	enzyme	TSG																					X	X		0
NCKAP5L	NCK associated protein 5 like	other	TSG																					X			0
MSH6	mutS homolog 6	enzyme	TSG																					X	X	X	968	X			X
MCTP1	multiple C2 and transmembrane domain containing 1	other	TSG																					X			1
MORC4	MORC family CW-type zinc finger 4	other	TSG																					X	X	X	1					X
MAP3K13	mitogen-activated protein kinase kinase kinase 13	kinase	TSG																					X		X	2
MSRB3	methionine sulfoxide reductase B3	enzyme	TSG																					X	X		7
LATS1	large tumor suppressor kinase 1	kinase	TSG																					X	X		168
KLHL8	kelch like family member 8	other	TSG																					X	X	X	0					X
IQCK	IQ motif containing K	other	TSG																					X			0
INPP4A	inositol polyphosphate-4-phosphatase type I A	phosphatase	TSG																					X			7
HMGB2	high mobility group box 2	transcription regulator	TSG																					X		X	35
GOLIM4	golgi integral membrane protein 4	other	TSG																					X	X		0
FOXJ3	forkhead box J3	transcription regulator	OG																					X	X		2
FOXA2	forkhead box A2	transcription regulator	TSG																					X		X	142			X
FGFR2	fibroblast growth factor receptor 2	kinase	OG																					X	X	X	668	X	X	X	X	X
FAM122A	family with sequence similarity 122A	other	OG																					X	X		0
ESRP1	epithelial splicing regulatory protein 1	other	TSG																					X			49
DYTN	dystrotelin	other	TSG																					X		--	0
DYRK1A	dual specificity tyrosine phosphorylation regulated kinase 1A	kinase	OG																					X	X		65
DNAJC11	DnaJ heat shock protein family (Hsp40) member C11	other	TSG																					X		X	2		X
DDX50	DExD-box helicase 50	enzyme	OG																					X	X		0
CCDC147	cilia and flagella associated protein 58	other	TSG																					X	X	--	1
BIVM	basic, immunoglobulin-like variable motif containing	other	TSG																					X			0
APOH	apolipoprotein H	transporter	TSG																					X			5
ALDH8A1	aldehyde dehydrogenase 8 family member A1	enzyme	TSG																					X	X		1
ZNF493	zinc finger protein 493	other	TSG																	X					X		1
TYW3	tRNA-yW synthesizing protein 3 homolog	other	TSG																	X							0
RUNX1T1	RUNX1 translocation partner 1	transcription regulator	TSG																	X					X	X	112
PCDHB10	protocadherin beta 10	other	TSG																	X							0
MAEL	maelstrom spermatogenic transposon silencer	other	TSG																	X							13
C2orf43	lipid droplet associated hydrolase	enzyme	TSG																	X					X	--	7
FAM171B	family with sequence similarity 171 member B	other	TSG																	X							1
BCL9L	B-cell CLL/lymphoma 9 like	other	TSG																	X						X	26
RB1CC1	RB1 inducible coiled-coil 1	other	TSG															X									46
BRCA1	BRCA1, DNA repair associated	transcription regulator	TSG															X							X	X	>1000	X	X	X	X	X
TRAT1	T-cell receptor associated transmembrane adaptor 1	kinase	OG														X								X		2
SP4	Sp4 transcription factor	transcription regulator	TSG														X								X		84
REG3G	regenerating family member 3 gamma	other	TSG														X								X	--	14
OR5M3	olfactory receptor family 5 subfamily M member 3	G-protein coupled receptor	TSG														X									--	0
OR4A16	olfactory receptor family 4 subfamily A member 16	G-protein coupled receptor	TSG														X									X	0					X
NOTCH2NL	notch 2 N-terminal like	other	TSG														X										0
MAPT	microtubule associated protein tau	other	TSG														X										62
LMX1B	LIM homeobox transcription factor 1 beta	transcription regulator	TSG														X										19
HEPACAM2	HEPACAM family member 2	other	TSG														X									--	1
DACH2	dachshund family transcription factor 2	other	OG														X								X		6
CSMD3	CUB and Sushi multiple domains 3	enzyme	OG														X								X		12
COL25A1	collagen type XXV alpha 1 chain	other	TSG														X										1
APOO	apolipoprotein O	other	TSG														X								X		0
GRM1	glutamate metabotropic receptor 1	G-protein coupled receptor	TSG		X											X											33
VWC2	von Willebrand factor C domain containing 2	other	TSG													X										--	0
TSHZ3	teashirt zinc finger homeobox 3	transcription regulator	TSG													X										X	5			X
RBM10	RNA binding motif protein 10	other	TSG													X										X	21	X				X
OR2M3	olfactory receptor family 2 subfamily M member 3	G-protein coupled receptor	TSG													X										--	0
MMP2	matrix metallopeptidase 2	peptidase	TSG													X											>1000
IL1RL1	interleukin 1 receptor like 1	transmembrane receptor	TSG													X										X	38
EPHA5	EPH receptor A5	kinase	TSG													X											31
CLSTN2	calsyntenin 2	transporter	TSG													X											0
TSC2	tuberous sclerosis 2	other	TSG												X											X	543	X
THBS3	thrombospondin 3	other	TSG												X												4
A1BG	alpha-1-B glycoprotein	other	TSG												X												10
TET2	tet methylcytosine dioxygenase 2	enzyme	TSG										X													X	296	X	X	X	X	X
RAD21	RAD21 cohesin complex component	transcription regulator	TSG										X													X	104	X		X		X
FLT3	fms related tyrosine kinase 3	kinase	TSG										X													X	>1000	X		X	X	X
ASXL1	additional sex combs like 1, transcriptional regulator	transcription regulator	TSG										X													X	123	X	X	X	X	X
STAT2	signal transducer and activator of transcription 2	transcription regulator	TSG								X															X	133
CSF3R	colony stimulating factor 3 receptor	transmembrane receptor	TSG								X														X	X	30	X
COL11A1	collagen type XI alpha 1 chain	other	TSG								X														X		51
CECR1	adenosine deaminase 2	enzyme	TSG								X																4
KDF1	keratinocyte differentiation factor 1	other	TSG				X			X																--	0
ZNF750	zinc finger protein 750	transcription regulator	TSG							X																X	11					X
VAMP1	vesicle associated membrane protein 1	transporter	TSG							X															X		3
UPF2	UPF2 regulator of nonsense transcripts homolog (yeast)	other	OG							X																	12
THSD7A	thrombospondin type 1 domain containing 7A	other	TSG							X																	0
SCAF4	SR-related CTD associated factor 4	other	TSG							X															X		0
SLC2A13	solute carrier family 2 member 13	transporter	TSG							X																	2
PDZRN4	PDZ domain containing ring finger 4	other	TSG							X															X		3
NOTCH2	notch 2	transcription regulator	TSG							X																X	261	X	X		X
MYH9	myosin heavy chain 9	enzyme	TSG			X				X																	54
JPH1	junctophilin 1	other	TSG							X																X	1
HNRNPUL1	heterogeneous nuclear ribonucleoprotein U like 1	other	TSG							X															X		6
FFAR2	free fatty acid receptor 2	G-protein coupled receptor	TSG							X																X	11
FNBP4	formin binding protein 4	other	TSG							X															X		2
CYLD	CYLD lysine 63 deubiquitinase	transcription regulator	TSG							X																X	151	X	X		X
CUL3	cullin 3	enzyme	TSG							X															X	X	118
C12orf42	chromosome 12 open reading frame 42	other	TSG							X															X	--	0
CD300E	CD300e molecule	other	TSG							X															X		0
AHDC1	AT-hook DNA binding motif containing 1	other	TSG							X																	1
OR2T3	olfactory receptor family 2 subfamily T member 34	other	TSG						X																	--	0
ZNF862	zinc finger protein 862	other	OG					X																			0
ZNF660	zinc finger protein 660	other	TSG					X																	X		0
ZNF233	zinc finger protein 233	other	TSG					X																			0
VWA8	von Willebrand factor A domain containing 8	other	TSG					X																		X	1
UPF3A	UPF3 regulator of nonsense transcripts homolog A (yeast)	transporter	TSG					X																			5
C18orf56	TYMS opposite strand	enzyme	TSG					X																	X		0
TNNT2	troponin T2, cardiac type	other	TSG					X																			4
SPZ1	spermatogenic leucine zipper 1	transcription regulator	TSG					X																	X		22
RAB6B	RAB6B, member RAS oncogene family	enzyme	TSG					X																			1
PURG	purine rich element binding protein G	other	OG					X																			1
PLEKHA6	pleckstrin homology domain containing A6	other	TSG					X																	X		0
KIF21A	kinesin family member 21A	other	OG					X																			3
KIAA1468	KIAA1468	other	TSG					X																			2
IFFO1	intermediate filament family orphan 1	other	OG					X																			3
GPRIN1	G protein regulated inducer of neurite outgrowth 1	other	TSG					X																	X	--	2
EGR1	early growth response 1	transcription regulator	TSG					X																		X	608
DCX	doublecortin	other	OG					X																			35
CLDN5	claudin 5	other	TSG					X																			36
BCOR	BCL6 corepressor	transcription regulator	TSG					X																		X	68	X	X		X	X
BCL9	B-cell CLL/lymphoma 9	other	TSG					X																	X	X	72
ATAD2	ATPase family, AAA domain containing 2	enzyme	TSG					X																	X		47
HTR1E	5-hydroxytryptamine receptor 1E	G-protein coupled receptor	OG					X																		X	0
TP63	tumor protein p63	transcription regulator	TSG				X																			X	609	X
SIX5	SIX homeobox 5	transcription regulator	TSG				X																		X	X	8
PRSS58	protease, serine 58	peptidase	TSG				X																				0
IFNGR1	interferon gamma receptor 1	transmembrane receptor	TSG				X																		X	X	28
POLQ	DNA polymerase theta	enzyme	OG				X																		X	X	29			X
TSC1	tuberous sclerosis 1	other	TSG		X																					X	366	X			X	X
PDXK	pyridoxal kinase	kinase	TSG		X																						10
MARK2	microtubule affinity regulating kinase 2	kinase	TSG		X																						25
FOXQ1	forkhead box Q1	transcription regulator	TSG		X																					X	47					X
CDKN1A	cyclin dependent kinase inhibitor 1A	kinase	TSG		X																				X	X	>1000			X		X
CX3CL1	C-X3-C motif chemokine ligand 1	cytokine	TSG		X																				X		111
ZFHX3	zinc finger homeobox 3	transcription regulator	TSG			X																				X	31	X				X
TSC22D1	TSC22 domain family member 1	transcription regulator	OG			X																			X	X	20
TBL1XR1	transducin beta like 1 X-linked receptor 1	transcription regulator	TSG			X																			X	X	28	X		X		X
SF3B1	splicing factor 3b subunit 1	other	OG			X																			X	X	159	X	X	X	X	X
SP3	Sp3 transcription factor	transcription regulator	TSG			X																				X	344
NCOR1	nuclear receptor corepressor 1	transcription regulator	TSG			X																			X	X	155	X		X	X	X
MYB	MYB proto-oncogene, transcription factor	transcription regulator	OG			X																			X	X	922					X
MED23	mediator complex subunit 23	transcription regulator	TSG			X																				X	17					X
IRF3	interferon regulatory factor 3	transcription regulator	TSG			X																				X	171
INPPL1	inositol polyphosphate phosphatase like 1	phosphatase	TSG			X																				X	94					X
HECTD4	HECT domain E3 ubiquitin protein ligase 4	other	OG			X																				--	1
GATA3	GATA binding protein 3	transcription regulator	TSG			X																				X	418	X	X	X	X	X
E2F1	E2F transcription factor 1	transcription regulator	TSG			X																				X	>1000
DUSP16	dual specificity phosphatase 16	phosphatase	TSG			X																			X	X	17
ASPA	aspartoacylase	enzyme	TSG			X																			X		7
ACTL6B	actin like 6B	other	TSG			X																					5
ACTG1	actin gamma 1	other	OG			X																					9
* genes are sorted by the number of significant cancer types (and then alphabetically)
