# Supplementary material for: A general calculus of fitness landscapes finds genes under selection in cancers
Source: HighWire-hosted journal article supplement (doi:10.1101/gr.275811.121), 2022-03-17
Supplement: Supplemental_Table_S6.xlsx [file Supplemental_Table_S6.xlsx]

## Sheet: Table_S6
Table S6. Candidate driver genes for the MC3 version of the TCGA data
Gene	ACC	BLCA	BRCA	CESC	CHOL	COAD	DLBC	ESCA	GBM	HNSC	KICH	KIRC	KIRP	LAML	LGG	LIHC	LUAD	LUSC	MESO	OV	PAAD	PCPG	PRAD	READ	SARC	SKCM	STAD	TGCT	THCA	THYM	UCEC	UCS	UVM	PANcancer
ACOT13																										X								X
ACTR8																										X								X
AK9																										X								X
APC						X																	X	X		X	X				X			X
ARID1B		X		X		X																				X								X
ARID2		X				X				X						X	X									X	X							X
ASXL2		X																								X								X
ATAD2																	X									X					X			X
BAZ1A																										X								X
BCL2L11				X																						X								X
BRAF						X											X									X			X					X
BRD7																X										X								X
C17orf80																										X								X
C1QTNF9B																										X								X
C7orf60																										X	X				X			X
CASP8						X				X																X	X				X			X
CCAR1																										X					X			X
CCDC102B																										X								X
CCDC82																										X					X			X
CDKN2A		X							X	X						X	X	X			X					X	X							X
CHD8																										X					X			X
COL21A1																										X								X
COL4A4																										X								X
COPS2																										X								X
CPSF6																										X								X
CRYBG3																										X								X
CTAGE6																										X								X
CTNNB1	X					X										X										X	X				X			X
DACH1																										X								X
DDX3X																										X					X			X
DEFB112																										X								X
DMC1																										X								X
EMB																										X								X
FAM117B																										X								X
FAM228A																										X								X
FBXW7		X		X		X		X		X							X	X						X		X	X				X	X		X
FGF7																										X								X
FIGNL1																										X								X
GIGYF2																								X		X								X
GNA11																										X							X	X
GOLGA5																										X					X			X
GPATCH2																										X					X			X
HERC4																										X								X
HHLA2																										X								X
IDH1					X				X						X											X								X
JUND																										X								X
KRAS				X		X											X				X			X		X	X	X			X			X
LARP4																										X								X
MAP1LC3A																										X								X
MAP2K1																										X								X
MAP3K1			X																							X					X			X
2021-03-11																										X								X
MEN1	X																									X	X							X
MEPCE																										X								X
MMP10																										X								X
MSH2																										X					X			X
NACA																										X								X
NF1		X	X						X						X		X	X		X		X				X					X			X
NGLY1																										X								X
NONO																										X								X
NOSTRIN																										X								X
NRAS						X																		X		X			X					X
OCIAD1																										X								X
PACRG																										X								X
PBRM1					X	X						X	X													X					X			X
PDE10A																										X								X
PGR																										X					X			X
PHF14																										X								X
PNPLA8																										X								X
PPP2R2A																										X								X
PPP6C																										X								X
PRR16																										X								X
PTEN			X	X		X			X	X		X			X			X					X		X	X	X		X		X	X		X
PURA																										X								X
RAC1										X																X								X
RAD50																										X								X
RASA2																										X								X
RB1		X	X	X				X	X	X							X	X		X					X	X					X	X		X
REEP6																										X								X
RNMT																										X					X			X
ROMO1																										X								X
RPL5																	X									X								X
RQCD1																										X								X
SETD2												X	X		X		X		X							X					X			X
SLAIN1																										X								X
SLC16A9																										X								X
SOX17																										X					X			X
STK11																	X									X								X
SYCP2						X																				X					X			X
TBC1D3B																										X								X
THRAP3		X																								X	X							X
TNP1																										X								X
TP53	X	X	X	X	X	X		X	X	X	X	X		X	X	X	X	X	X	X	X		X	X	X	X	X		X	X	X	X		X
TRIP6																										X								X
TUSC3																										X					X			X
TWIST1																										X								X
TXNL1																										X					X			X
VEGFA																										X								X
VPS13C																										X					X			X
WTIP																										X								X
YLPM1																										X					X			X
ZFAND4																										X								X
ZFP91																										X								X
ZNF428																										X								X
ZNF829																										X								X
ABCB10																																		X
ACVR1B						X											X										X							X
ACVR2A						X										X																		X
AHI1																																		X
AJUBA										X																								X
AKR1B15																															X			X
AKT1			X																															X
AMER1						X																		X										X
AMY2A																																		X
ANKRD30B																															X			X
ARHGAP35																	X	X		X											X	X		X
ARID1A		X	X	X		X		X				X			X	X	X	X			X			X			X				X	X		X
ATAD2B																																		X
ATAD5																															X			X
ATF6																																		X
ATF7IP																	X														X			X
ATM		X				X						X					X				X		X				X				X			X
ATP11B																															X			X
ATPAF1																																		X
ATRX									X						X										X									X
AVEN																																		X
B2M				X		X	X										X							X							X			X
BAP1					X							X				X			X														X	X
BCAT1																																		X
BCL10																																		X
BMPR1A																																		X
BRWD1																											X							X
BTG3																																		X
C14orf28																															X			X
C2CD5																																		X
C3orf38																																		X
C9orf41																																		X
CACUL1																															X			X
CAPS2																																		X
CASC3																											X							X
CASP1																																		X
CASP7																																		X
CBFB			X																															X
CCDC181																															X			X
CCDC23																																		X
CCDC39																															X			X
CCDC41																																		X
CCDC67																															X			X
CCDC73																															X			X
CD34																																		X
CD58																															X			X
CDC14A																																		X
CDC7																															X			X
CDC73																																		X
CDH1			X																								X							X
CDK12						X																	X											X
CDK13																																		X
CDKN1B			X																				X											X
CEBPA																																		X
CENPA																																		X
CEP112																															X			X
CEP135																																		X
CEP19																																		X
CEP290																															X			X
CETN3																																		X
CHD4																											X				X	X		X
CHDC2																	X																	X
CHEK2		X																																X
CHRNA6																																		X
CIC															X																			X
CISH																																		X
CKS2																																		X
CLDN5																																		X
CLEC2B																																		X
CLINT1																															X			X
CMAS																															X			X
CPEB2																											X				X			X
CREB5																											X				X			X
CREBBP		X	X	X						X								X																X
CRLS1																																		X
CROT																											X							X
CSNK1G1																																		X
CSNK2A1							X																								X			X
CTAGE5																																		X
CTCF			X			X				X																					X			X
CTH																																		X
CUL3										X			X					X																X
CUL4B																															X			X
CYP4V2																																		X
DBP																																		X
DBX2																																		X
DDX50																															X			X
DENND1B																																		X
DENND6A																																		X
DIO2																															X			X
DNAJC24																																		X
DPCD																															X			X
DUSP16																																		X
DYRK3																																		X
E2F1																															X			X
E2F5						X																									X			X
E2F7																																		X
EEF1A1		X																																X
EGFR									X						X		X																	X
EIF1AX																																		X
EIF2AK3																																		X
EIF4EBP2		X																																X
ELAVL1																																		X
ELF3		X																									X							X
ELL2																															X			X
EN2																															X			X
EP300		X		X						X																					X			X
EPB41L4A																																		X
ERBB2			X																															X
ERBB3																																		X
ESCO1																																		X
ESRP1																															X			X
ESRP2																																		X
ETV6						X																												X
EXD1																																		X
EZH1																																		X
FAM122A																																		X
FAM133A																																		X
FAM174B																																		X
FAM213A																															X			X
FAM216A																																		X
FBXL17																																		X
FBXO5																																		X
FCHO2																																		X
FER						X																					X							X
FETUB																															X			X
FGF2																																		X
FMR1																															X			X
FOPNL																																		X
FOXA2																															X			X
FOXC1																																		X
FOXE1																																		X
FOXF1																																		X
FOXF2																																		X
FOXJ3																															X			X
FOXQ1		X																																X
FRA10AC1																											X				X			X
FSIP1																															X			X
FTSJD1																	X																	X
FUBP1															X																			X
G3BP2																															X			X
GATA6																																		X
GDAP2																																		X
GFM1																																		X
GIPC2																																		X
GLRX3																																		X
GNAQ																																	X	X
GPRASP1																																		X
GPS2			X																															X
GRSF1																															X			X
GSK3B																																		X
GTF2I																														X				X
GTF3C2																																		X
GXYLT1																																		X
HAX1																																		X
HCFC2																																		X
HDGF																																		X
HECA						X																												X
HFM1																																		X
HLA-A						X				X																								X
HLA-B				X		X	X			X																	X							X
HMG20A																															X			X
HNRNPAB																																		X
HNRNPCL1																																		X
HNRNPD																															X			X
HOOK1																																		X
HOXA10																																		X
HOXA11																															X			X
HOXA4																																		X
HOXD11																																		X
HRAS		X								X								X				X							X	X				X
HRASLS																																		X
HRASLS5																																		X
HSD11B1																																		X
HSP90AA1																																		X
IDH2															X																			X
IFFO1						X																												X
IFRD1																															X			X
IL15RA																																		X
IRF2																											X				X			X
IWS1																																		X
JAK2																															X			X
JMJD1C																													X					X
KANSL1		X																									X							X
KARS																																		X
KCTD9																											X							X
KDM6A		X											X							X			X											X
KEAP1																X	X	X																X
KIAA0408																															X			X
KIAA0907																																		X
KIAA1324L																																		X
KLF13																																		X
KLF16																																		X
KLF5		X		X																														X
KLHDC1																																		X
KMT2C		X	X	X														X													X			X
KMT2D		X		X			X	X		X								X					X				X							X
KPNA3																																		X
KRTAP22-1																X																		X
LACTB																																		X
LARP1B																															X			X
LATS1				X																														X
LCA5																															X			X
LIN9																																		X
LRP12																																		X
LSM11																																		X
LSM14A																																		X
LYSMD3																																		X
MAN1A2																																		X
MAP2K4			X			X																					X							X
MAP3K13																																		X
MAPK1				X						X																								X
MAX																	X														X			X
MBNL1																																		X
MCM9																																		X
METTL1																																		X
MEX3C																																		X
MGA																	X														X			X
MICU3																															X			X
MLH1																																		X
MMADHC																															X			X
MORC4																															X			X
MRPL40																																		X
MRPL46																																		X
MRPL47																																		X
MSH6																															X			X
MSL3																																		X
MSX1																															X			X
MSX2																																		X
MTFR1																																		X
MYBL1																																		X
MYEF2																																		X
MYSM1																															X			X
NAA15																															X			X
NAF1																																		X
NBEAL1						X																									X			X
NBN																															X			X
NF2										X			X						X															X
NFE2L2		X						X		X						X	X	X													X			X
NKX3-1																							X											X
NKX6-1																																		X
NOBOX																																		X
NOP58																															X			X
NPS																																		X
NR3C1																																		X
NSD1										X								X													X			X
NSUN6																															X			X
NSUN7																															X			X
NT5DC1																																		X
NTS																																		X
ONECUT3																																		X
OR8K5																	X																	X
OSGEPL1																																		X
OTX2																																		X
PABPN1																																		X
PAN3																																		X
PAPD4						X																												X
PAPD5																																		X
PAX5																																		X
PAXBP1																																		X
PCGF2																																		X
PDE3B																															X			X
PGRMC2																																		X
PHF20L1																															X			X
PHF3																															X			X
PI4K2A																																		X
PIBF1																															X			X
PIK3CA		X	X	X		X			X	X					X			X													X			X
PIK3R1			X			X			X															X			X				X			X
PIK3R3																											X							X
PKIB																																		X
PKN2																																		X
PNISR						X																									X			X
POLD3																																		X
POLQ																																		X
POT1																																		X
POU3F1																																		X
PPFIA2																																		X
PPIL6																																		X
PPM1D																															X			X
PPP2R1A																															X	X		X
PPP4R2																																		X
PRKCI																											X							X
PRPF38B																																		X
PSIP1		X																																X
PTPLA																																		X
PTPN11																																		X
PTTG1																																		X
PUS7																															X			X
PVRL3																																		X
RAB3GAP1																																		X
RABEP1																																		X
RAD18																																		X
RAD54B																																		X
RAE1																															X			X
RAPGEF6																																		X
RARA																																		X
RARG																																		X
RARS2																																		X
RASA1										X								X									X				X			X
RBL2																															X			X
RBM18																															X			X
RBM27																															X			X
RBM48																															X			X
RCC2																																		X
REST																																		X
RFC5																																		X
RFX6																															X			X
RGS4																																		X
RHEB																																		X
RIC3																																		X
RIT1																																		X
RLF																																		X
RMDN1																																		X
RNF43																					X						X				X			X
ROCK1																																		X
ROCK2																															X			X
RP9																																		X
RPGR																																		X
RPL22																																		X
RRAS2																																		X
RSRC1																																		X
RTF1																																		X
RTKN2																															X			X
RUNX1		X	X											X																				X
SCAF11						X																									X			X
SCAF4																															X			X
SCAF8																																		X
SCAPER																																		X
SCLT1																																		X
SENP7																															X			X
SETDB2																															X			X
SF1		X																																X
SF3B14																															X			X
SFPQ																															X			X
SH3GLB2																															X			X
SHB																																		X
SIN3A																											X				X			X
SIRT1																																		X
SLC17A5																																		X
SLC25A46																																		X
SMAD2						X																									X			X
SMAD3						X																												X
SMAD4			X			X		X									X				X			X			X							X
SMARCA4															X		X	X																X
SMC6																															X			X
SMIM11																																		X
SOWAHB																																		X
SOX21																																		X
SOX9						X																		X										X
SPACA1																																		X
SPATA22																																		X
SPOP																							X											X
SRSF4																															X			X
SSX2IP																																		X
STAG2		X							X				X																					X
STPG2																																		X
STYX																																		X
SUDS3																																		X
TAB2																																		X
TAF1																															X			X
TAF5																																		X
TBC1D12																															X			X
TBP																																		X
TCEAL5																																		X
TCEB3C																															X			X
TCEB3CL2																																		X
TCF12																																		X
TCHP																																		X
TEX26																																		X
TGFBR1																																		X
TGFBR2						X				X											X						X							X
TGIF2																																		X
TGIF2-C20orf24																																		X
THOC7																																		X
TIGD7																															X			X
TINAG																																		X
TMA16																															X			X
TMEM64																											X							X
TMEM65																																		X
TNIP3																																		X
TNPO1																																		X
TP53BP1																															X			X
TPD52																																		X
TPRKB																															X			X
TRAK2																															X			X
TRDN																															X			X
TSC22D1																																		X
TSGA10																																		X
TTK																																		X
TTLL7																																		X
U2AF1																	X																	X
UBE2E3																																		X
UBE2Q1																																		X
UBQLN2																																		X
UNCX																																		X
UPF3A																															X			X
USP12																																		X
USP28																	X																	X
UTY																																		X
VHL												X																						X
WBP4																																		X
WDR52																															X			X
WNK3																																		X
WT1																																		X
WTAP																																		X
XBP1																																		X
XPO4																																		X
YBX2																																		X
YY1																																		X
ZAR1																																		X
ZBED5																															X			X
ZBTB25																																		X
ZC3H13						X		X																			X				X			X
ZC3H6																															X			X
ZFP36L2		X																																X
ZFP90																															X			X
ZIC5																																		X
ZNF136																																		X
ZNF14						X																		X							X			X
ZNF180																															X			X
ZNF354B																																		X
ZNF367																																		X
ZNF37A																																		X
ZNF432																																		X
ZNF451																																		X
ZNF483																																		X
ZNF568																																		X
ZNF583						X																												X
ZNF619																																		X
ZNF701																																		X
ZNF705D																																		X
ZNF800																																		X
ZNHIT6																																		X
AASS																										X
ABCA5																										X
ABCD3																										X
ABL2																										X
ACP6																										X
ACSM2B																										X
ACTR2																										X
ACTRT3																										X
ADAM22																										X
ADPRM																										X
AES																										X
AGAP6																										X
AK5																										X
ALAD																										X
ALDH5A1																										X
ALG10																										X					X
AMBRA1																										X
ANKEF1																										X
ANKHD1																										X
ANKHD1-EIF4EBP3																										X
ANKRA2																										X
ANKRD32																										X
AP3B1																										X
APCS																										X
AQP2																										X
AREG																										X
AREL1																										X
ARL2																										X
ARL6IP1																										X
ART4																										X
ASB6																										X
ASPM																										X
ASUN																										X
ATP6V0E1																										X
ATP9B																										X
ATXN2																										X
B3GNT4																										X
BAAT																										X
BCAP31																										X
BHLHE40																										X
BIN3																										X
BIVM-ERCC5																										X
BTBD8																										X
C11orf94																										X
C19orf44																										X
C1GALT1																										X
C1QL3																										X
C1orf123																										X
C1orf146																										X
C1orf194																										X
C1orf63																										X
C3orf36																										X
CALCA																										X
CAPZA3																										X
CASQ2																										X
CAT																										X
CBL																										X
CCDC64																										X
CCDC93																										X
CCHCR1																										X
CCL11																										X
CCR8																										X
CD72																										X
CDC25B																										X
CDC25C																										X
CDC37L1																										X
CDCA2																										X
CDON																										X
CEP170B																										X
CEP63																										X
CFH																										X
CFHR3																										X
CGGBP1																										X
CHGB																										X
CLEC2L																										X
CLIC6																										X
CLSTN1																										X
CLYBL																										X
CNOT1		X																								X
COL10A1																										X
COL11A1																	X									X
COL12A1																										X
COL13A1																										X
COL16A1																										X
COL19A1																										X
COL28A1																										X
COL4A3																										X
COL4A6																										X
COL9A2																										X
COX7A2L																										X
COX7C																										X
COX8C																										X
CPO																										X
CRADD																										X
CRB2																										X
CRYAA																										X
CSNK1A1																										X
CUEDC2																										X
CWC22																										X
CYB5A																										X
CYP3A7																										X
CYP3A7-CYP3AP1																										X
DARS																										X
DCAF7																										X
DDHD1																										X
DDOST																										X
DDX17																										X
DDX20																										X
DDX42																										X
DDX60L																										X
DGKQ																										X
DHRS7C																										X
DHX29																										X
DHX57																										X
DICER1																										X					X
DIS3L																										X
DNAJC5																										X
DPP10																										X
DPPA3																										X
DSC3																										X
DSPP																										X
DST																	X									X
DYM																										X
DYNAP																										X
ECE1																										X
EFNA3																										X
EMID1																										X
ENPP3																										X
ENTHD2																										X
EPS15																										X
ERCC5																										X
ERLIN2																										X
ETAA1																										X
ETS1																										X
F13A1																										X
F13B																										X
FAAH2																										X
FABP2																										X
FAM129B																										X
FAM184A																										X
FAM26F																										X
FAM78B																										X
FAM81A																										X
FAXDC2																										X
FBXL5																										X
FBXO11																										X
FBXO45																										X
FCGR2B																										X
FCHO1																										X
FDCSP																										X
FGF20																										X
FMO3																										X
FNDC3A																										X
FNIP1																										X
FOLH1B																										X
FOXB1																										X
FOXK1																										X
FSCB																										X
GABBR2																										X
GAGE2C																										X
GALNTL5																										X
GAMT																										X
GCSH																										X
GEMIN2																										X
GGNBP2																										X
GGT6																										X
GH2																										X
GLOD4																										X
GLRX2																										X
GML																										X
GNAI2																										X
GNG2																										X
GOLGA1																										X
GOLGA7B																										X
GPATCH1																										X
GPR151																										X					X
GPR161																										X
GRIK2																										X
GRIP1																										X
GTF3C3																										X
GTPBP4																										X
GTSE1																										X
GUSB																										X
HAUS1																										X
HDAC3																										X
HEATR5B																										X
HLA-DMA																										X
HMCN1																										X
HOMER2																										X
HSPA4L																										X					X
HTN3																										X
IARS2																										X
IFT46																										X
IGFL3																										X
IGLL1																										X
IL23R																										X
INMT																										X
ISX																										X
ITGA9																										X
JDP2																										X
KAT2B																										X
KAT8																										X
KCMF1																										X
KIAA0586																										X
KIAA1109																										X
KIAA1429																										X
KIAA1551																										X
KIF13B																										X
KLC1																										X
KLRC3																										X
KMT2A		X																								X
KRTAP26-1																										X
KRTAP3-1																										X
LACC1																										X
LDLRAD4																										X
LEFTY1																										X
LIN28A																										X
LIN7A																										X
LIPI																										X
LNX2																										X
LRBA																										X
LRRC19																										X
LRRTM2																										X
LY6G5C																										X
LYRM4																										X
MAGEB3																										X
MAGEE1																										X
MAL2																										X
MALL																										X
MAN1C1																										X
MAST4																										X
MB21D2																										X
MCM3																										X
MED13L																										X
MED6																										X
MEIG1																										X
METTL24																										X
MEX3D																										X
MIOX																										X
MMP1																										X
MMRN1																										X
MOGAT1																										X
MORN3																										X
MRPL41																										X
MST4																										X
MSTO1																										X
MTMR10																										X
MUC7																										X
MVB12B																										X
MYBPC1																										X
MYOCD						X																				X
N4BP2																										X
NAV3																										X
NCR3																										X
NDUFS7																										X
NEK9																										X
NFX1																										X
NIT2																										X
NPHS2																										X					X
NUCKS1																										X
NUP107																										X
NUP155																										X
NUP88																										X
OLA1																										X
OPALIN																										X
OPN1LW																										X
OR11H1																										X
OR4D5																										X
OR51I2																										X
OSBPL10																										X
OTUD3																										X
PAPSS2																										X
PARD6G																										X
PARP14																										X
PARP16																										X
PAX1																										X	X
PCDH7																										X
PCNXL4																										X
PDGFA																										X
PDK4																										X
PEA15																										X
PGLYRP1																										X
PGM2L1																										X
PIAS1																										X
PIH1D1																										X
PKLR																										X
PLAC1																										X
PLXNC1																										X
PNLIP																										X
PNMA3																										X
POLA2																										X
POLR2C																										X
POLR3B																										X
PPBP																										X
PPFIA1																										X
PPP2R3C																										X
PPP2R5B																										X
PPP3R2																										X
PPY																										X
PRICKLE3																										X
PROSER1																										X
PRPH2																										X
PRPSAP1																										X
PRSS50																										X
PSMA8																										X
PTPN22																										X
PUM2																										X
QKI																										X
QRICH1																										X
R3HDM2																										X
RAD51C																										X
RAI14																										X
RALGPS2																										X
RALYL																										X
RANBP9																										X
RARRES2																										X
RASSF8																										X
RBAK																										X
RBBP4																										X
RBBP6																										X					X
RBM46																										X
RCAN3																										X
RCBTB1																										X
REG1A																										X
RETSAT																										X
RFC1																										X
RGS22																										X
RIPPLY2																										X
RNF219																										X
RNF38																										X
RSBN1																										X
SAMD10																										X
SCYL3																										X
SEC23B																										X
SEC24D																										X
SEL1L2																										X
SELL																										X
SERGEF																										X
SERP1																										X
SETD5																										X
SH3RF3																										X
SHC3																										X
SHISA4																										X
SLC16A1																										X
SLC17A9																										X
SLC22A16																										X
SLC22A23																										X
SLC23A2																										X
SLC25A21																										X
SLC25A42																										X
SLC40A1																										X
SLC5A8																										X
SLC6A12																										X
SLC6A13																										X
SLC7A13																										X
SLC7A8																										X
SLC9B1																										X
SLC9C2																										X
SLCO1C1																										X
SLCO4C1																										X
SMARCB1																										X
SMIM15																										X
SMIM21																										X
SMURF2																										X
SNX27																										X
SNX7																										X
SOCS5																										X
SORT1																										X
SOS2																										X
SP8																										X
SPAG7																										X
SPAST																										X
SPRED3																										X
SPRR1A																										X
SRP68																										X
SRSF9																										X
SSR4																										X
SSX3																										X
ST6GALNAC3																										X
STK3																										X
STOML3																										X
SUN5																										X
SVEP1																										X
SYBU																										X
SYNJ2BP																										X
SYTL5																										X
TAP2						X																				X
TARS																										X
TAS2R46																										X
TAS2R9																										X
TBCCD1																										X
TBK1																										X
TCTN3																										X
TFRC																										X
TIGIT																										X
TMCO5A																										X
TMEM207																										X
TMEM68																										X
TNFRSF10B																										X
TNFSF13B																										X
TPST1																										X
TRAPPC3																										X
TRAT1																										X
TRIM37																										X
TTC21B																										X
TTPA																										X
TUBB3																										X
TUSC2																										X
UBE2J2																										X
UBE2K																										X
UBE2V2																										X
UBXN1																										X
UBXN6																										X
UCK2																										X
UGT2A1																										X
UGT2A3																										X
UHRF1BP1L																										X
UIMC1																										X
UQCRB																										X
USP30																										X
UXS1																										X
VPS35																										X
VSTM4																										X
WDR31																										X
WDR55																										X
WDR59																										X
WDR75																										X
WDR77																										X
WISP3																										X
ZBED2																										X
ZBTB17																										X
ZCCHC24																										X
ZDHHC2																										X
ZFP14																										X
ZFX																										X
ZNF211																										X
ZNF226																										X
ZNF28																										X
ZNF347																										X
ZNF484																										X
ZNF585B																										X
ZNF644																										X
ZNF677																										X
ZNF684																										X
ZNF691																										X
ZNF727																										X
ZNF777																										X
ZP4																										X
ZPBP																										X
ADAM30																											X
AFF1																															X
AGBL3																															X
AGGF1						X
AGK																															X
AGPAT5																															X
ALDH1L1																	X
ALG5																															X
AMER3																															X
ANAPC15																		X
ANKRD30A																															X
ANKRD34A																											X
ARHGAP27						X
ARHGAP5						X																									X
ARID4B																															X
ARID5B																															X
ARIH2		X
ASCL3																	X
ASTN2																	X
ASXL1						X
ATG4C																															X
ATP12A		X
ATP6V1B2																															X
ATXN2L						X
AXIN1																X
BACE2																															X
BAIAP2L1						X
BAZ2A		X
BCHE																	X
BCL9L						X																		X
BCOR						X																					X
BMS1																															X
BRCA1																				X
BRD1																															X
BRSK1						X
BRWD3																															X
BTBD7																															X
C10orf90						X
C14orf39																															X
C1orf172										X
C3orf33																															X
C3orf35																	X
CACNA1A																															X
CCDC146																															X
CCDC147																															X
CCDC158																															X
CCDC160																															X
CCDC37																											X
CCDC66																											X
CCDC77																															X
CCDC83		X
CCDC88A																															X
CCDC90B																															X
CCND1																															X
CCPG1										X
CCSER1																															X
CD1E																															X
CDC42EP1																															X
CDH10																	X
CDKL2																															X
CDKN1A		X														X
CEACAM7																															X
CEP350																															X
CEP76																															X
CERS2																															X
CFHR4																	X
CHD2																															X
CHTOP																															X
CILP																		X
CLSTN2																	X
CNBD1																											X
CNTLN																															X
COL25A1																		X
COL5A2																	X
CREB3						X
CSDE1																															X
CSMD3																	X
CTAGE1																	X														X
CTIF																															X
CTNNA1																											X
CTNND1																											X
CUX1																															X
CXorf38		X
CYLC2						X
CYLD										X
CYP1A1																	X
CYP2C18																															X
CYSLTR2																																	X
DAZAP1		X
DCC																															X
DCLK1																											X
DCTN5																	X
DCX						X
DEPDC5									X
DGKB																													X
DHRS7																											X
DHX16																											X
DHX9																															X
DIAPH2																															X
DNAH8						X
DNAJC1																															X
DNAJC2																															X
DOCK11																															X
DPCR1																															X
DSTN																															X
DYNC2H1						X
DYRK1A																															X
EAF2																															X
EDNRB																		X
EFR3A																															X
EHBP1																															X
EIF2A																															X
EIF2AK1																															X
EIF4G3																															X
ELF4																											X
EPAS1																						X
EPHA2		X			X					X
EPHA5																	X
EPRS																	X
EPS8		X
ERCC2		X
EXOSC9																															X
FAM13B																															X
FAM167A																											X
FAM208A																															X
FAM46D																											X
FAM63B																															X
FAM96A																															X
FAT1		X		X						X								X
FGFR2																															X
FGFR3		X
FILIP1L																															X
FOXA1			X																				X
FOXG1																											X
FPR3																															X
FUBP3																	X
GABRA1																															X
GATA3			X
GCC2																															X
GCFC2																															X
GDA																															X
GEN1																															X
GFOD2																															X
GJA1																															X
GOLIM4																															X
GPATCH11																															X
GPATCH2L																															X
GPATCH8																											X
GPR22																															X
GRB14																															X
GUCY2C																															X
HAND2																											X
HBD																	X
HIST1H1E																X
HIST1H4C																		X
HIVEP1																	X
HIVEP2																															X
HKR1																	X
HMGN5						X																									X
HMMR																															X
HNRNPUL1																															X
HOXB1		X
HOXD3						X
HS3ST3A1																	X
HS3ST4																		X
HSPA12B																				X
HSPH1																															X
HTN1																															X
HTR1E						X
HTR2C																															X
IBTK																															X
IDE																															X
IFNA8																	X
IFNGR1																															X
IL15																															X
IL32																															X
IL6ST																X
IL7R																											X
IL9R																	X
ILDR2																		X
ING1																															X
INPP4B																															X
INTS12																											X
INTS8						X
IQCF2																															X
IQCK																								X							X
JAK1																															X
JPH1										X
KANSL1L																															X
KCNB2																											X
KCNJ3																											X
KCNK17						X
KCTD3																															X
KDM3B																															X
KDM5C												X
KHDRBS2																								X
KIAA0141																											X
KIAA0947																															X
KIAA1715																															X
KIAA1804						X
KIT																												X
KLHL14							X
KMT2B						X																									X
KRTAP12-2																															X
LARP7																															X
LATS2																			X
LOC643802																															X
LPCAT4																															X
LRP1																				X
LRRIQ1																															X
LRTM2																	X
LTV1																															X
MAD2L1																															X
MAEL																															X
MAGEB1																	X
MAML2																		X
MAP2K7																											X
MAP7D3						X
MARK2		X
MBD1																															X
MCTP1																															X
MED23			X
MED8																															X
METTL14																															X
METTL2A																															X
MFSD9																											X
MGAT5																	X
MKL1																															X
MMP16																		X
MORC3																															X
MPP5																															X
MRE11A																															X
MRPL48																					X
MRPS31																															X
MSI1																													X
MTF2																											X
MTOR												X
MTRF1																															X
MUC17																															X
MUC4				X
MYB			X
MYBPH						X
MYCN																															X
MYEOV2																															X
MYH9										X
MYT1															X
NAP1L1																															X
NAV1																															X
NBEA																															X
NCOR1			X
NEBL																															X
NELFE																															X
NETO2																															X
NEUROD4						X
NGFRAP1																															X
NIPBL						X									X
NKAPL						X
NLRC5																											X
NOLC1																															X
NOTCH1								X		X					X			X
NOTCH2										X
NPAT						X
NPR3																															X
NRIP1																															X
NSG1																	X
NT5C1B-RDH14																															X
NUCB2																															X
OAS2																															X
OFD1																															X
OLFM3																	X
OMA1																															X
OR10AG1																		X
OR10G8																	X
OR2L8																	X
OR4C11										X
OR4K1																		X
OR4L1						X
OR6P1						X
OSBPL1A																															X
OSBPL2																															X
PARD3B																											X
PARL																															X
PCBP1						X
PCDHGA10																	X
PDE3A																															X
PDZRN4										X
PHF21A									X
PHLDA3		X
PHLPP1																															X
PIGU																															X
PIK3R2																															X
PLA2G7																											X
PLCZ1																											X
PLD5																															X
PLEKHA6						X
PLOD3																											X
POLE																															X
POLR2F																															X
POU3F3																	X
PPARGC1A																	X
PPIG																															X
PPP1R36						X
PPP1R9A						X
PPP3CA																	X										X
PRDM1																	X
PRKAA2																															X
PRKAR1A	X
PRSS35																		X
PTGR2																															X
PTPN3		X
PURG						X
PYHIN1																															X
QSER1																															X
QTRTD1																															X
RAB3GAP2																															X
RALA																															X
RASAL2																															X
RASSF9																															X
RBM10		X															X
RBM45																															X
RCOR3																											X
RHBDD1																											X
RHOA																											X
RNASEH2B																															X
RNASEL						X
ROBO1																															X
RPGRIP1L																															X
RPL18A						X
RPS6KA3																X
RPS6KA6																											X				X
RSL1D1																															X
RUFY1																											X
RUSC1-AS1																															X
RXFP2																															X
RXRA		X
SAFB																															X
SCAND3						X
SDE2																		X
SF3B1			X																														X
SHANK1																	X
SKIV2L2																															X
SLC22A3																															X
SLC25A24																															X
SLC25A33																															X
SLC25A34						X
SLC6A15																											X
SLITRK4																		X
SLTM																															X
SMAP1																															X
SMARCC1																															X
SMC4																															X
SMC5																															X
SMG1																				X
SMTN																															X
SOX2		X
SOX6						X
SPEM1						X
SPEN			X
SPINK5																															X
SPRY3																		X
SPZ1																															X
SRCAP																	X
SRRM2																	X
SSH2																															X
SSH3		X
ST13																															X
ST8SIA6																X	X
STAMBPL1																															X
STAU2						X
SULT1C2																		X
SYCP1																															X
SZT2																															X
TAMM41																															X
TBC1D10A																															X
TBC1D23																	X
TBL1XR1			X
TBX3			X			X
TCEB3																															X
TCERG1																															X
TCF4																															X
TCF7L2						X																		X
TEX15																											X
TFAM																															X
TFDP1																															X
TGIF1						X
THOC1																															X
THUMPD1																															X
TMEM206																															X
TMEM255A																	X
TMF1																															X
TNNT2						X
TOP2A																				X							X
TOR1AIP1																															X
TP53BP2																															X
TPR																								X							X
TRIM48																	X
TRIM51																		X
TRIOBP																	X
TSC1		X
TSC2																X
TTC14																															X
TUB						X
TVP23A																															X
TXNDC2																															X
TXNIP		X
TYW3																								X
UBXN4																															X
UPF2										X
UPRT						X
USP26																															X
UTP6																															X
VAMP1																X
WDR17																	X
WDR45B																															X
WDR78																															X
XPO6																	X
YTHDF2						X
ZBTB20															X
ZBTB47																															X
ZBTB7B																																X
ZFHX3																							X
ZFP57		X																													X
ZMYM2																															X
ZMYM3																							X
ZNF174																															X
ZNF19																															X
ZNF234																									X
ZNF292																											X				X
ZNF440										X
ZNF492																	X
ZNF674																															X
ZNF679																	X
ZNF740																															X
ZNF750				X				X		X
ZNF75D																															X
ZNF80																		X
ZNRF3	X					X
ZRANB3																															X
ZSCAN5A																											X
ZXDA																		X
