# Supplementary material for: A general calculus of fitness landscapes finds genes under selection in cancers
Source: HighWire-hosted journal article supplement (doi:10.1101/gr.275811.121), 2022-03-17
Supplement: Supplemental_Table_S8.xlsx [file Supplemental_Table_S8.xlsx]

## Sheet: Table_S8
Table S8. IPA canonical pathway
Ingenuity Canonical Pathways	-log(q-value)	%Overlap	Genes
Hereditary Breast Cancer Signaling	14.7	0.188	PBRM1,PIK3CA,ARID1A,PIK3R1,HRAS,KRAS,ARID2,SMARCA4,MLH1,PTEN,EP300,RB1,SMARCC2,BRCA1,CHEK2,ATM,TP53,NRAS,CREBBP,FGFR2,BRD7,SMARCA2,CDKN1A,E2F1,MSH6,BRCA2,ACTL6B
Pancreatic Adenocarcinoma Signaling	14.1	0.203	MAP2K4,TP53,CDKN2A,SMAD2,PIK3CA,JAK1,TFDP1,MAPK1,PIK3R1,RAC1,FGFR2,KRAS,JAK2,SIN3A,TGFBR2,RB1,CDKN1A,E2F1,BRCA2,SMAD4,CDKN1B,NOTCH1,EGFR,ATM
Molecular Mechanisms of Cancer	14.1	0.106	MAP2K4,CDKN2A,PIK3CA,JAK1,MAPK1,PIK3R1,SOS2,HRAS,KRAS,JAK2,EP300,BRAF,TGFBR2,RB1,SMAD4,CASP8,BRCA1,CTNNB1,RASA1,CHEK2,ATM,TP53,SMAD2,GNAS,NRAS,TFDP1,CREBBP,RAC1,FGFR2,APC,SIN3A,GNAI2,CDH1,MAX,NF1,E2F1,CDKN1A,CDKN1B,NOTCH1,BCL2L11
Ovarian Cancer Signaling	13.3	0.174	CDKN2A,PIK3CA,MAPK1,PIK3R1,HRAS,KRAS,MLH1,PTEN,BRAF,RB1,MTOR,BRCA1,CTNNB1,EGFR,ATM,TP53,NRAS,TFDP1,FGFR2,MMP2,SIN3A,APC,E2F1,MSH6,BRCA2
Glucocorticoid Receptor Signaling	13.3	0.118	MAP2K4,PBRM1,PIK3CA,ARID1A,JAK1,MAPK1,PIK3R1,SOS2,HRAS,ARID2,KRAS,JAK2,SMARCA4,PGR,EP300,TGFBR2,CEBPA,SMAD4,NCOR1,SMARCC2,ATM,SMAD2,NRAS,MAP3K1,CREBBP,RAC1,FGFR2,BRD7,TAF1,TAF4,SMARCA2,CDKN1A,NRIP1,ACTL6B
Glioblastoma Multiforme Signaling	13.3	0.162	CDKN2A,TSC1,PIK3CA,MAPK1,PIK3R1,SOS2,NF2,HRAS,KRAS,PTEN,RB1,MTOR,TSC2,PLCL1,CTNNB1,EGFR,ATM,TP53,NRAS,RAC1,FGFR2,APC,NF1,CDKN1A,E2F1,CDKN1B
Prostate Cancer Signaling	13.3	0.219	TP53,PIK3CA,NRAS,TFDP1,MAPK1,PIK3R1,CREBBP,SOS2,HRAS,FGFR2,KRAS,SIN3A,PTEN,EP300,RB1,MTOR,CDKN1A,E2F1,CDKN1B,CTNNB1,ATM
Melanoma Signaling	12	0.291	CDKN2A,TP53,PIK3CA,NRAS,MAPK1,PIK3R1,HRAS,FGFR2,KRAS,PTEN,BRAF,RB1,CDH1,E2F1,CDKN1A,ATM
PI3K/AKT Signaling	12	0.176	TP53,TSC1,RHEB,PIK3CA,JAK1,NRAS,MAPK1,PPP2R2A,PIK3R1,SOS2,HRAS,KRAS,INPPL1,JAK2,PTEN,PPP2R1A,MTOR,PPP2R2B,CDKN1A,TSC2,CDKN1B,CTNNB1
Glioma Signaling	12	0.188	CDKN2A,TP53,PIK3CA,NRAS,TFDP1,MAPK1,PIK3R1,SOS2,HRAS,FGFR2,KRAS,SIN3A,IDH1,PTEN,RB1,MTOR,CDKN1A,E2F1,IDH2,EGFR,ATM
Role of BRCA1 in DNA Damage Response	11.9	0.231	PBRM1,TP53,ARID1A,ARID2,MLH1,SMARCA4,RB1,BRD7,SMARCA2,CDKN1A,E2F1,MSH6,BRCA2,SMARCC2,BRCA1,ACTL6B,CHEK2,ATM
Regulation of the Epithelial-Mesenchymal Transition Pathway	11.8	0.138	MAP2K4,PIK3CA,JAK1,MAPK1,PIK3R1,SOS2,HRAS,KRAS,BCL9,JAK2,TGFBR2,BRAF,NOTCH2,SMAD4,CTNNB1,EGFR,ATM,SMAD2,NRAS,EGR1,FGFR2,MMP2,APC,FGF6,CDH1,NOTCH1
RAR Activation	11.8	0.137	MAP2K4,PBRM1,SMAD2,NSD1,PIK3CA,ARID1A,MAPK1,PIK3R1,MAP3K1,CREBBP,RAC1,ARID2,JAK2,RBP1,SMARCA4,EP300,PTEN,BRD7,TAF4,SMARCA2,SMAD4,SMARCC2,NCOR1,NRIP1,ACTL6B,ADH4
Acute Myeloid Leukemia Signaling	11.6	0.204	RUNX1,MAP2K4,CSF3R,PIK3CA,NRAS,MAPK1,PIK3R1,FLT3,SOS2,HRAS,FGFR2,KRAS,IDH1,BRAF,MTOR,CEBPA,KIT,IDH2,ATM
Chronic Myeloid Leukemia Signaling	10.7	0.183	CDKN2A,TP53,PIK3CA,NRAS,TFDP1,MAPK1,PIK3R1,SOS2,HRAS,FGFR2,KRAS,SIN3A,TGFBR2,RB1,CDKN1A,E2F1,SMAD4,CDKN1B,ATM
AMPK Signaling	10.4	0.123	PBRM1,TSC1,PIK3CA,ARID1A,MAPK1,PPP2R2A,PIK3R1,ARID2,SMARCA4,PPM1D,EP300,MTOR,TSC2,SMARCC2,ATM,GNAS,STK11,CREBBP,FGFR2,PPP2R1A,BRD7,SMARCA2,CDKN1A,PPP2R2B,ACTL6B
Colorectal Cancer Metastasis Signaling	10	0.109	MAP2K4,PIK3CA,JAK1,MAPK1,PIK3R1,SOS2,HRAS,KRAS,JAK2,MLH1,TGFBR2,BRAF,SMAD4,CTNNB1,EGFR,ATM,TP53,SMAD2,NRAS,GNAS,RAC1,FGFR2,IFNGR1,MMP2,APC,CDH1,MSH6
Non-Small Cell Lung Cancer Signaling	9.9	0.208	CDKN2A,TP53,PIK3CA,NRAS,TFDP1,MAPK1,PIK3R1,SOS2,HRAS,FGFR2,KRAS,SIN3A,RB1,E2F1,EGFR,ATM
Telomerase Signaling	9.33	0.162	TP53,PIK3CA,NRAS,MAPK1,PPP2R2A,PIK3R1,SOS2,HRAS,FGFR2,KRAS,RB1,PPP2R1A,PPP2R2B,CDKN1A,TEP1,E2F1,EGFR,ATM
p70S6K Signaling	8.97	0.144	PIK3CA,JAK1,NRAS,MAPK1,PPP2R2A,PIK3R1,SOS2,HRAS,FGFR2,KRAS,GNAI2,PPP2R1A,MTOR,MAPT,PPP2R2B,PLCL1,AGTR1,EGFR,ATM
Endometrial Cancer Signaling	8.96	0.219	TP53,PIK3CA,NRAS,MAPK1,PIK3R1,SOS2,HRAS,FGFR2,KRAS,MLH1,PTEN,CDH1,CTNNB1,ATM
PDGF Signaling	8.9	0.178	MAP2K4,PIK3CA,JAK1,NRAS,MAPK1,PIK3R1,MAP3K1,SOS2,HRAS,FGFR2,KRAS,INPPL1,JAK2,ABL2,RASA1,ATM
TGF-β Signaling	8.13	0.172	MAP2K4,SMAD2,NRAS,MAPK1,CREBBP,SOS2,HRAS,KRAS,ACVR1B,TGIF1,EP300,TGFBR2,RUNX2,SMAD4,ACVR2A
Bladder Cancer Signaling	8.09	0.17	CDKN2A,TP53,NRAS,TFDP1,MAPK1,HRAS,KRAS,MMP2,SIN3A,FGF6,RB1,CDH1,E2F1,CDKN1A,EGFR
HER-2 Signaling in Breast Cancer	8.09	0.17	TP53,TSC1,PIK3CA,NRAS,PIK3R1,SOS2,HRAS,FGFR2,KRAS,MMP2,CDKN1A,TSC2,CDKN1B,EGFR,ATM
Mouse Embryonic Stem Cell Pluripotency	7.87	0.151	TP53,PIK3CA,JAK1,NRAS,MAPK1,PIK3R1,CREBBP,SOS2,HRAS,FGFR2,KRAS,JAK2,APC,SMAD4,CTNNB1,ATM
EGF Signaling	7.61	0.191	MAP2K4,PIK3CA,JAK1,MAPK1,PIK3R1,SOS2,MAP3K1,HRAS,FGFR2,MTOR,RASA1,EGFR,ATM
p53 Signaling	7.6	0.144	TP53,CDKN2A,WT1,PIK3CA,TP63,PIK3R1,FGFR2,PTEN,EP300,RB1,CDKN1A,E2F1,BRCA1,CTNNB1,CHEK2,ATM
PPARα/RXRα Activation	7.59	0.111	MAP2K4,SMAD2,MED23,GNAS,NRAS,MAPK1,IL1RL1,CREBBP,SOS2,HRAS,KRAS,JAK2,ACVR1B,EP300,TGFBR2,CLOCK,SMAD4,NCOR1,PLCL1,ACVR2A
JAK/Stat Signaling	7.53	0.169	PIK3CA,JAK1,NRAS,MAPK1,PIK3R1,SOS2,HRAS,FGFR2,KRAS,JAK2,MTOR,CDKN1A,STAT2,ATM
FLT3 Signaling in Hematopoietic Progenitor Cells	7.4	0.165	PIK3CA,NRAS,MAPK1,PIK3R1,CREBBP,SOS2,FLT3,HRAS,FGFR2,KRAS,EP300,MTOR,STAT2,ATM
PTEN Signaling	7.21	0.134	PIK3CA,NRAS,MAPK1,PIK3R1,SOS2,RAC1,HRAS,FGFR2,KRAS,INPPL1,PTEN,TGFBR2,CDKN1A,CDKN1B,BCL2L11,EGFR
NGF Signaling	7.17	0.133	TP53,MAP2K4,PIK3CA,NRAS,MAPK1,PIK3R1,MAP3K13,CREBBP,SOS2,MAP3K1,RAC1,HRAS,FGFR2,KRAS,EP300,ATM
Role of NANOG in Mammalian Embryonic Stem Cell Pluripotency	7.08	0.131	TP53,PIK3CA,NRAS,JAK1,MAPK1,PIK3R1,SOS2,HRAS,FGFR2,KRAS,JAK2,APC,RIF1,SMAD4,CTNNB1,ATM
Cell Cycle: G1/S Checkpoint Regulation	6.99	0.188	TP53,CDKN2A,RB1,MAX,TFDP1,E2F1,CDKN1A,SMAD4,RPL5,CDKN1B,SIN3A,ATM
Estrogen Receptor Signaling	6.8	0.125	NRAS,MED23,MAPK1,SOS2,CREBBP,HRAS,KRAS,SMARCA4,EP300,PGR,TAF1,TAF4,THRAP3,RUNX2,NCOR1,NRIP1
Breast Cancer Regulation by Stathmin1	6.8	0.0985	TP53,PIK3CA,NRAS,GNAS,MAPK1,PPP2R2A,PIK3R1,SOS2,RAC1,HRAS,FGFR2,KRAS,GNAI2,PPP2R1A,PPP2R2B,CDKN1A,E2F1,RB1CC1,CDKN1B,ATM
Epithelial Adherens Junction Signaling	6.8	0.116	MYH9,NRAS,RAC1,HRAS,KRAS,APC,ACVR1B,PTEN,TGFBR2,CDH1,NOTCH2,KEAP1,CTNNB1,ACTG1,NOTCH1,ACVR2A,EGFR
Renal Cell Carcinoma Signaling	6.67	0.157	PIK3CA,NRAS,MAPK1,PIK3R1,CREBBP,SOS2,RAC1,HRAS,FGFR2,KRAS,VHL,EP300,ATM
HGF Signaling	6.65	0.13	CDKN2A,MAP2K4,PIK3CA,NRAS,MAPK1,PIK3R1,MAP3K13,SOS2,MAP3K1,RAC1,HRAS,FGFR2,KRAS,CDKN1A,ATM
Myc Mediated Apoptosis Signaling	6.6	0.171	TP53,CDKN2A,MAP2K4,PIK3CA,NRAS,PIK3R1,SOS2,HRAS,FGFR2,KRAS,CASP8,ATM
B Cell Receptor Signaling	6.6	0.1	MAP2K4,PIK3CA,NRAS,MAPK1,EGR1,PIK3R1,MAP3K13,CREBBP,MAP3K1,SOS2,RAC1,HRAS,FGFR2,KRAS,INPPL1,PTEN,EP300,MTOR,ATM
Wnt/β-catenin Signaling	6.55	0.105	CDKN2A,TP53,PPP2R2A,CREBBP,MARK2,TLE1,BCL9,APC,ACVR1B,EP300,TGFBR2,SOX17,CDH1,PPP2R1A,PPP2R2B,SOX9,CTNNB1,ACVR2A
IL-4 Signaling	6.34	0.146	PIK3CA,JAK1,NRAS,PIK3R1,SOS2,HLA-B,HRAS,FGFR2,KRAS,INPPL1,JAK2,MTOR,ATM
Role of Tissue Factor in Cancer	6.3	0.122	TP53,PIK3CA,NRAS,MAPK1,EGR1,PIK3R1,RAC1,HRAS,FGFR2,KRAS,JAK2,PTEN,MTOR,EGFR,ATM
Insulin Receptor Signaling	6.3	0.113	TSC1,PIK3CA,JAK1,NRAS,MAPK1,PIK3R1,SOS2,HRAS,FGFR2,KRAS,INPPL1,JAK2,PTEN,MTOR,TSC2,ATM
Xenobiotic Metabolism Signaling	6.28	0.0801	MAP2K4,ABCB1,PIK3CA,NRAS,MAPK1,PPP2R2A,PIK3R1,MAP3K13,CREBBP,MAP3K1,ALDH8A1,HRAS,FGFR2,KRAS,EP300,CUL3,HS6ST1,PPP2R1A,KEAP1,PPP2R2B,NRIP1,NFE2L2,ATM
Cancer Drug Resistance By Drug Efflux	6.27	0.204	TP53,BRAF,ABCB1,PIK3CA,NRAS,MAPK1,PIK3R1,HRAS,KRAS,PTEN
GDNF Family Ligand-Receptor Interactions	6.27	0.158	MAP2K4,PIK3CA,NRAS,MAPK1,PIK3R1,SOS2,RAC1,HRAS,FGFR2,KRAS,RASA1,ATM
Neurotrophin/TRK Signaling	6.27	0.158	MAP2K4,PIK3CA,NRAS,MAPK1,PIK3R1,CREBBP,SOS2,HRAS,FGFR2,KRAS,EP300,ATM
Hepatic Fibrosis / Hepatic Stellate Cell Activation	6.21	0.0984	COL19A1,SMAD2,MYH9,IL1RL1,COL4A3,FGFR2,COL8A1,IFNGR1,MMP2,COL28A1,COL16A1,TGFBR2,SMAD4,COL4A4,COL11A1,COL25A1,AGTR1,EGFR
CNTF Signaling	6.21	0.175	PIK3CA,MTOR,JAK1,NRAS,MAPK1,PIK3R1,HRAS,FGFR2,KRAS,JAK2,ATM
Cyclins and Cell Cycle Regulation	6.17	0.154	TP53,CDKN2A,RB1,PPP2R1A,TFDP1,PPP2R2A,PPP2R2B,E2F1,CDKN1A,CDKN1B,SIN3A,ATM
GNRH Signaling	6.1	0.116	MAP2K4,NRAS,GNAS,MAPK1,EGR1,MAP3K13,CREBBP,SOS2,MAP3K1,RAC1,HRAS,KRAS,EP300,GNAI2,EGFR
14-3-3-mediated Signaling	6.02	0.115	MAP2K4,TSC1,PIK3CA,NRAS,MAPK1,PIK3R1,STK11,HRAS,FGFR2,KRAS,MAPT,TSC2,CDKN1B,PLCL1,ATM
Th2 Pathway	6.01	0.107	PIK3CA,JAK1,CHD4,IL1RL1,PIK3R1,HLA-B,FGFR2,JAK2,ACVR1B,TGFBR2,NOTCH2,GATA3,NOTCH1,TIMD4,ACVR2A,ATM
Melanocyte Development and Pigmentation Signaling	6	0.134	PIK3CA,NRAS,GNAS,MAPK1,PIK3R1,SOS2,CREBBP,HRAS,FGFR2,KRAS,EP300,KIT,ATM
Adipogenesis pathway	5.92	0.112	CDKN2A,TP53,FGFR2,FBXW7,RBP1,SIN3A,NR1D2,RUNX1T1,KLF5,CLOCK,CEBPA,SOX9,KLF3,TBL1XR1,KMT2B
FAK Signaling	5.92	0.131	PIK3CA,NRAS,MAPK1,PIK3R1,SOS2,RAC1,HRAS,FGFR2,KRAS,ACTG1,ATM,PTEN,EGFR
Prolactin Signaling	5.92	0.145	PIK3CA,NRAS,MAPK1,PIK3R1,CREBBP,SOS2,HRAS,FGFR2,KRAS,JAK2,EP300,ATM
Germ Cell-Sertoli Cell Junction Signaling	5.92	0.0983	MAP2K4,PIK3CA,NRAS,MAPK1,PIK3R1,MAP3K13,MAP3K1,RAC1,HRAS,FGFR2,KRAS,TGFBR2,CDH1,KEAP1,CTNNB1,ACTG1,ATM
ErbB2-ErbB3 Signaling	5.86	0.159	PIK3CA,NRAS,MAPK1,PIK3R1,SOS2,HRAS,FGFR2,KRAS,CDKN1B,ATM,PTEN
Small Cell Lung Cancer Signaling	5.82	0.141	TP53,RB1,PIK3CA,MAX,TFDP1,PIK3R1,E2F1,FGFR2,CDKN1B,SIN3A,ATM,PTEN
Role of p14/p19ARF in Tumor Suppression	5.82	0.209	TP53,CDKN2A,RB1,PIK3CA,PIK3R1,E2F1,RAC1,FGFR2,ATM
PEDF Signaling	5.72	0.138	TP53,PIK3CA,NRAS,MAPK1,PIK3R1,RAC1,HRAS,FGFR2,KRAS,CASP8,ATM,TCF12
Aryl Hydrocarbon Receptor Signaling	5.72	0.107	CDKN2A,TP53,TFDP1,MAPK1,ALDH8A1,SMARCA4,EP300,RB1,E2F1,CDKN1A,NRIP1,CDKN1B,NFE2L2,CHEK2,ATM
SAPK/JNK Signaling	5.71	0.125	MAP2K4,TP53,PIK3CA,NRAS,MAP3K13,PIK3R1,MAP3K1,SOS2,RAC1,HRAS,FGFR2,KRAS,ATM
mTOR Signaling	5.71	0.0896	TSC1,RHEB,PIK3CA,NRAS,MAPK1,PPP2R2A,PIK3R1,STK11,RAC1,HRAS,FGFR2,KRAS,PRR5L,MTOR,PPP2R1A,PPP2R2B,TSC2,ATM
Renin-Angiotensin Signaling	5.71	0.115	MAP2K4,PIK3CA,NRAS,MAPK1,PIK3R1,SOS2,MAP3K1,RAC1,HRAS,FGFR2,KRAS,JAK2,AGTR1,ATM
GM-CSF Signaling	5.66	0.151	RUNX1,PIK3CA,NRAS,MAPK1,PIK3R1,SOS2,HRAS,FGFR2,KRAS,JAK2,ATM
UVA-Induced MAPK Signaling	5.64	0.123	MAP2K4,TP53,PIK3CA,MTOR,NRAS,MAPK1,PIK3R1,HRAS,FGFR2,KRAS,PLCL1,ATM,EGFR
STAT3 Pathway	5.61	0.149	MAP2K4,TGFBR2,NRAS,MAPK1,CDKN1A,RAC1,HRAS,FGFR2,KRAS,JAK2,EGFR
FGF Signaling	5.61	0.133	PIK3CA,MAPK1,PIK3R1,CREBBP,MAP3K1,SOS2,RAC1,HRAS,FGFR2,EP300,ATM,FGF6
Th1 and Th2 Activation Pathway	5.58	0.0919	PIK3CA,JAK1,CHD4,IL1RL1,PIK3R1,HLA-B,FGFR2,IFNGR1,JAK2,ACVR1B,TGFBR2,NOTCH2,GATA3,NOTCH1,TIMD4,ACVR2A,ATM
Antiproliferative Role of Somatostatin Receptor 2	5.57	0.147	BRAF,PIK3CA,NRAS,MAPK1,PIK3R1,CDKN1A,HRAS,FGFR2,KRAS,CDKN1B,ATM
T Cell Receptor Signaling	5.53	0.119	MAP2K4,PIK3CA,NRAS,MAPK1,PIK3R1,MAP3K1,SOS2,RAC1,HRAS,FGFR2,KRAS,RASA1,ATM
Ceramide Signaling	5.47	0.129	MAP2K4,PPP2R1A,PIK3CA,NRAS,PPP2R2A,PIK3R1,PPP2R2B,MAP3K1,HRAS,FGFR2,KRAS,ATM
Estrogen-Dependent Breast Cancer Signaling	5.46	0.143	PIK3CA,NRAS,MAPK1,PIK3R1,CREBBP,HRAS,FGFR2,KRAS,EP300,ATM,EGFR
Gap Junction Signaling	5.38	0.0936	PIK3CA,NRAS,GNAS,MAPK1,PIK3R1,SOS2,HRAS,FGFR2,KRAS,GNAI2,SP3,PLCL1,CTNNB1,ACTG1,EGFR,ATM
Paxillin Signaling	5.37	0.115	MAP2K4,PIK3CA,NRAS,MAPK1,PIK3R1,SOS2,RAC1,HRAS,FGFR2,KRAS,PTPN12,ACTG1,ATM
NRF2-mediated Oxidative Stress Response	5.36	0.0881	MAP2K4,PIK3CA,NRAS,MAPK1,PIK3R1,CREBBP,MAP3K1,HRAS,FGFR2,KRAS,DNAJC11,EP300,CUL3,KEAP1,NFE2L2,ACTG1,ATM
IL-2 Signaling	5.35	0.156	PIK3CA,JAK1,NRAS,MAPK1,PIK3R1,SOS2,HRAS,FGFR2,KRAS,ATM
PKCθ Signaling in T Lymphocytes	5.33	0.105	MAP2K4,PIK3CA,NRAS,MAPK1,PIK3R1,MAP3K13,SOS2,MAP3K1,HLA-B,RAC1,HRAS,FGFR2,KRAS,ATM
ATM Signaling	5.33	0.138	TP53,MAP2K4,PPP2R2B,CREBBP,CDKN1A,TP53BP1,BRCA1,CHEK2,EP300,ATM,PPM1D
Regulation of IL-2 Expression in Activated and Anergic T Lymphocytes	5.33	0.138	MAP2K4,TGFBR2,SMAD2,NRAS,MAPK1,MAP3K1,SOS2,RAC1,HRAS,SMAD4,KRAS
ILK Signaling	5.3	0.0867	MAP2K4,PIK3CA,MYH9,MAPK1,PPP2R2A,PIK3R1,CREBBP,FGFR2,PTEN,EP300,CDH1,PPP2R1A,MTOR,PPP2R2B,CTNNB1,ACTG1,ATM
ErbB Signaling	5.28	0.122	MAP2K4,PIK3CA,MTOR,NRAS,MAPK1,PIK3R1,SOS2,HRAS,FGFR2,KRAS,ATM,EGFR
IL-8 Signaling	5.27	0.0863	MAP2K4,PIK3CA,NRAS,GNAS,MAPK1,PIK3R1,RAC1,HRAS,FGFR2,KRAS,MMP2,GNAI2,BRAF,CDH1,MTOR,EGFR,ATM
Huntington's Disease Signaling	5.25	0.0782	TP53,MAP2K4,PIK3CA,MAPK1,GRM1,PIK3R1,CREBBP,SOS2,HRAS,FGFR2,SIN3A,EP300,MTOR,TAF4,NCOR1,CASP8,RASA1,EGFR,ATM
Regulation of eIF4 and p70S6K Signaling	5.21	0.0955	PIK3CA,NRAS,MAPK1,PPP2R2A,PIK3R1,SOS2,HRAS,FGFR2,KRAS,EIF2S2,MTOR,PPP2R1A,PPP2R2B,EIF1AX,ATM
HIF1α Signaling	5.21	0.11	TP53,PIK3CA,NRAS,MAPK1,PIK3R1,CREBBP,HRAS,FGFR2,KRAS,MMP2,EP300,VHL,ATM
IL-3 Signaling	5.2	0.133	PIK3CA,JAK1,NRAS,MAPK1,PIK3R1,RAC1,HRAS,FGFR2,KRAS,JAK2,ATM
Thyroid Cancer Signaling	5.15	0.2	TP53,BRAF,CDH1,NRAS,MAPK1,HRAS,KRAS,CTNNB1
G-Protein Coupled Receptor Signaling	5.11	0.0733	PIK3CA,GNAS,NRAS,MAPK1,GRM1,PDE10A,PIK3R1,CREBBP,SOS2,RGS16,HRAS,FGFR2,KRAS,EP300,BRAF,GNAI2,HTR1E,RASA1,AGTR1,ATM
IL-17 Signaling	5.11	0.129	MAP2K4,PIK3CA,JAK1,NRAS,MAPK1,PIK3R1,HRAS,FGFR2,KRAS,JAK2,ATM
VEGF Signaling	5.09	0.117	PIK3CA,NRAS,MAPK1,PIK3R1,SOS2,HRAS,FGFR2,KRAS,ACTG1,EIF2S2,EIF1AX,ATM
Role of CHK Proteins in Cell Cycle Checkpoint Control	5.05	0.164	TP53,PPP2R1A,PPP2R2A,PPP2R2B,E2F1,CDKN1A,BRCA1,CHEK2,ATM
Role of JAK1 and JAK3 in γc Cytokine Signaling	5	0.141	PIK3CA,JAK1,NRAS,MAPK1,PIK3R1,HRAS,FGFR2,KRAS,JAK2,ATM
IGF-1 Signaling	4.97	0.113	PIK3CA,JAK1,NRAS,MAPK1,PIK3R1,SOS2,HRAS,FGFR2,KRAS,JAK2,RASA1,ATM
UVC-Induced MAPK Signaling	4.93	0.186	TP53,MAP2K4,BRAF,NRAS,MAPK1,HRAS,KRAS,EGFR
Cardiac Hypertrophy Signaling	4.88	0.0763	MAP2K4,PIK3CA,NRAS,GNAS,MAPK1,PIK3R1,MAP3K13,CREBBP,MAP3K1,HRAS,FGFR2,KRAS,EP300,TGFBR2,GNAI2,MTOR,PLCL1,ATM
IL-6 Signaling	4.86	0.102	MAP2K4,ABCB1,PIK3CA,NRAS,MAPK1,IL1RL1,PIK3R1,SOS2,HRAS,FGFR2,KRAS,JAK2,ATM
Role of NFAT in Cardiac Hypertrophy	4.8	0.0829	MAP2K4,PIK3CA,NRAS,GNAS,MAPK1,PIK3R1,MAP3K1,SOS2,HRAS,FGFR2,KRAS,EP300,TGFBR2,GNAI2,PLCL1,ATM
Production of Nitric Oxide and Reactive Oxygen Species in Macrophages	4.78	0.0825	MAP2K4,PIK3CA,JAK1,MAPK1,PPP2R2A,PIK3R1,MAP3K13,CREBBP,MAP3K1,RAC1,FGFR2,IFNGR1,JAK2,PPP2R1A,PPP2R2B,ATM
Gα12/13 Signaling	4.76	0.0992	MAP2K4,PIK3CA,NRAS,MAPK1,PIK3R1,MAP3K1,HRAS,FGFR2,KRAS,CDH1,CTNNB1,RASA1,ATM
IL-15 Signaling	4.76	0.132	PIK3CA,JAK1,NRAS,MAPK1,PIK3R1,HRAS,FGFR2,KRAS,JAK2,ATM
ERK/MAPK Signaling	4.65	0.0804	PIK3CA,NRAS,MAPK1,PPP2R2A,PIK3R1,CREBBP,SOS2,RAC1,HRAS,FGFR2,KRAS,EP300,BRAF,PPP2R1A,PPP2R2B,ATM
Cell Cycle: G2/M DNA Damage Checkpoint Regulation	4.52	0.163	TP53,CDKN2A,CDKN1A,BRCA1,CHEK2,EP300,ATM,PPM1D
Erythropoietin Signaling	4.52	0.123	PIK3CA,NRAS,MAPK1,PIK3R1,SOS2,HRAS,FGFR2,KRAS,JAK2,ATM
CTLA4 Signaling in Cytotoxic T Lymphocytes	4.52	0.111	B2M,PPP2R1A,PIK3CA,PPP2R2A,PIK3R1,HLA-B,PPP2R2B,TRAT1,FGFR2,JAK2,ATM
Fc Epsilon RI Signaling	4.49	0.101	MAP2K4,PIK3CA,NRAS,MAPK1,PIK3R1,SOS2,RAC1,HRAS,FGFR2,INPPL1,KRAS,ATM
Thrombopoietin Signaling	4.49	0.138	PIK3CA,NRAS,MAPK1,PIK3R1,HRAS,FGFR2,KRAS,JAK2,ATM
PAK Signaling	4.45	0.109	MAP2K4,PIK3CA,NRAS,MAPK1,PIK3R1,SOS2,RAC1,HRAS,FGFR2,KRAS,ATM
UVB-Induced MAPK Signaling	4.44	0.136	TP53,MAP2K4,PIK3CA,MTOR,MAPK1,PIK3R1,FGFR2,ATM,EGFR
CREB Signaling in Neurons	4.44	0.0811	PIK3CA,NRAS,GNAS,MAPK1,GRM1,PIK3R1,SOS2,CREBBP,HRAS,FGFR2,KRAS,EP300,GNAI2,PLCL1,ATM
Virus Entry via Endocytic Pathways	4.42	0.108	B2M,PIK3CA,NRAS,PIK3R1,HLA-B,RAC1,HRAS,FGFR2,KRAS,ACTG1,ATM
Antiproliferative Role of TOB in T Cell Signaling	4.32	0.231	TGFBR2,RB1,SMAD2,MAPK1,SMAD4,CDKN1B
FcγRIIB Signaling in B Lymphocytes	4.3	0.151	MAP2K4,PIK3CA,NRAS,PIK3R1,HRAS,FGFR2,KRAS,ATM
LPS-stimulated MAPK Signaling	4.28	0.115	MAP2K4,PIK3CA,NRAS,MAPK1,PIK3R1,RAC1,HRAS,FGFR2,KRAS,ATM
Glioma Invasiveness Signaling	4.25	0.129	PIK3CA,NRAS,MAPK1,PIK3R1,HRAS,FGFR2,MMP2,KRAS,ATM
Neuregulin Signaling	4.24	0.114	MTOR,NRAS,MAPK1,PIK3R1,SOS2,HRAS,KRAS,CDKN1B,PTEN,EGFR
ErbB4 Signaling	4.16	0.125	PIK3CA,NRAS,MAPK1,PIK3R1,SOS2,HRAS,FGFR2,KRAS,ATM
Ephrin Receptor Signaling	4.14	0.0805	NRAS,GNAS,MAPK1,SOS2,CREBBP,RAC1,HRAS,KRAS,JAK2,EP300,GNAI2,EPHA5,EPHA2,RASA1
P2Y Purigenic Receptor Signaling Pathway	4.05	0.0902	GNAI2,PIK3CA,NRAS,MAPK1,PIK3R1,CREBBP,HRAS,FGFR2,KRAS,PLCL1,EP300,ATM
Sertoli Cell-Sertoli Cell Junction Signaling	4.03	0.0787	MAP2K4,NRAS,MAPK1,MAP3K13,MAP3K1,RAC1,HRAS,KRAS,PTEN,CDH1,CLDN5,KEAP1,CTNNB1,ACTG1
PPAR Signaling	3.96	0.105	NRAS,MAPK1,IL1RL1,CREBBP,SOS2,HRAS,NCOR1,KRAS,NRIP1,EP300
NF-κB Signaling	3.96	0.0773	PIK3CA,NRAS,PIK3R1,MAP3K1,CREBBP,HRAS,FGFR2,KRAS,EP300,TGFBR2,BRAF,CASP8,EGFR,ATM
IL-17A Signaling in Airway Cells	3.9	0.115	MAP2K4,PIK3CA,JAK1,MAPK1,PIK3R1,FGFR2,JAK2,ATM,PTEN
Rac Signaling	3.9	0.094	MAP2K4,PIK3CA,NRAS,MAPK1,PIK3R1,MAP3K1,RAC1,HRAS,FGFR2,KRAS,ATM
CDK5 Signaling	3.82	0.101	PPP2R1A,GNAS,NRAS,MAPK1,PPP2R2A,MAPT,EGR1,PPP2R2B,HRAS,KRAS
CXCR4 Signaling	3.78	0.0788	MAP2K4,GNAI2,PIK3CA,GNAS,NRAS,MAPK1,PIK3R1,EGR1,RAC1,HRAS,FGFR2,KRAS,ATM
Natural Killer Cell Signaling	3.74	0.0902	PIK3CA,NRAS,MAPK1,PIK3R1,SOS2,RAC1,HRAS,FGFR2,INPPL1,KRAS,ATM
fMLP Signaling in Neutrophils	3.71	0.0894	GNAI2,PIK3CA,GNAS,NRAS,MAPK1,PIK3R1,RAC1,HRAS,FGFR2,KRAS,ATM
Dendritic Cell Maturation	3.7	0.0729	B2M,MAP2K4,PIK3CA,MAPK1,PIK3R1,HLA-B,CREBBP,FGFR2,CD58,JAK2,EP300,STAT2,PLCL1,ATM
Oncostatin M Signaling	3.68	0.176	JAK1,NRAS,MAPK1,HRAS,KRAS,JAK2
Acute Phase Response Signaling	3.66	0.0765	MAP2K4,PIK3CA,MTOR,NRAS,MAPK1,APOH,PIK3R1,MAP3K1,SOS2,HRAS,KRAS,JAK2,RBP1
Integrin Signaling	3.66	0.0685	MAP2K4,PIK3CA,NRAS,MAPK1,PIK3R1,SOS2,RAC1,HRAS,FGFR2,KRAS,PTEN,ARHGAP5,BRAF,ACTG1,ATM
Cell Cycle Regulation by BTG Family Proteins	3.61	0.171	RB1,PPP2R1A,PPP2R2A,PPP2R2B,E2F1,HOXB9
NF-κB Activation by Viruses	3.56	0.103	PIK3CA,NRAS,MAPK1,PIK3R1,MAP3K1,HRAS,FGFR2,KRAS,ATM
HIPPO signaling	3.56	0.103	SMAD2,PPP2R1A,PPP2R2A,AJUBA,PPP2R2B,NF2,SMAD4,AMOT,LATS1
Agrin Interactions at Neuromuscular Junction	3.53	0.116	MAP2K4,NRAS,MAPK1,RAC1,HRAS,KRAS,ACTG1,EGFR
VEGF Family Ligand-Receptor Interactions	3.53	0.102	PIK3CA,NRAS,MAPK1,PIK3R1,SOS2,HRAS,FGFR2,KRAS,ATM
CCR3 Signaling in Eosinophils	3.53	0.0846	GNAI2,PIK3CA,GNAS,NRAS,MAPK1,PIK3R1,RAC1,HRAS,FGFR2,KRAS,ATM
Actin Cytoskeleton Signaling	3.51	0.0661	PIK3CA,MYH9,NRAS,MAPK1,PIK3R1,SOS2,RAC1,HRAS,FGFR2,KRAS,APC,FGF6,ARHGAP35,ACTG1,ATM
Estrogen-mediated S-phase Entry	3.46	0.208	RB1,TFDP1,E2F1,CDKN1A,CDKN1B
HMGB1 Signaling	3.45	0.0827	MAP2K4,PIK3CA,NRAS,MAPK1,PIK3R1,RAC1,HRAS,FGFR2,KRAS,IFNGR1,ATM
Role of Macrophages, Fibroblasts and Endothelial Cells in Rheumatoid Arthritis	3.44	0.0579	MAP2K4,PIK3CA,NRAS,MAPK1,IL1RL1,PIK3R1,CREBBP,RAC1,HRAS,FGFR2,KRAS,JAK2,APC,EP300,CEBPA,PLCL1,CTNNB1,ATM
Th1 Pathway	3.4	0.0815	NOTCH2,PIK3CA,JAK1,PIK3R1,HLA-B,FGFR2,IFNGR1,JAK2,GATA3,NOTCH1,ATM
DNA Double-Strand Break Repair by Homologous Recombination	3.35	0.286	ATRX,BRCA2,BRCA1,ATM
Leukocyte Extravasation Signaling	3.32	0.0664	MAP2K4,GNAI2,ARHGAP5,PIK3CA,CLDN5,MAPK1,PIK3R1,RAC1,ARHGAP35,FGFR2,MMP2,CTNNB1,ACTG1,ATM
Regulation of Cellular Mechanics by Calpain Protease	3.29	0.123	RB1,NRAS,MAPK1,HRAS,KRAS,CDKN1B,EGFR
Sumoylation Pathway	3.27	0.0938	TP53,MAP2K4,CDH1,SP3,CREBBP,CEBPA,MYB,SMAD4,EP300
BMP signaling pathway	3.27	0.105	MAP2K4,NRAS,MAPK1,RUNX2,CREBBP,HRAS,SMAD4,KRAS
Endothelin-1 Signaling	3.23	0.0684	PIK3CA,NRAS,GNAS,MAPK1,PIK3R1,FGFR2,HRAS,KRAS,GNAI2,BRAF,CASP8,PLCL1,ATM
TR/RXR Activation	3.21	0.0918	PIK3CA,MTOR,GPS2,PIK3R1,FGFR2,NCOR1,TBL1XR1,EP300,ATM
VDR/RXR Activation	3.2	0.103	WT1,RUNX2,IL1RL1,CDKN1A,CEBPA,NCOR1,CDKN1B,EP300
Angiopoietin Signaling	3.2	0.103	PIK3CA,NRAS,PIK3R1,HRAS,FGFR2,KRAS,RASA1,ATM
Tight Junction Signaling	3.2	0.0719	TGFBR2,PPP2R1A,MYH9,CLDN5,PPP2R2A,PPP2R2B,MARK2,CEBPA,RAC1,CTNNB1,ACTG1,PTEN
Ephrin A Signaling	3.17	0.117	PIK3CA,PIK3R1,RAC1,EPHA5,FGFR2,EPHA2,ATM
Role of PI3K/AKT Signaling in the Pathogenesis of Influenza	3.17	0.101	GNAI2,PIK3CA,MAPK1,PIK3R1,FGFR2,IRF3,MLH1,ATM
Synaptic Long Term Depression	3.11	0.0748	GNAI2,PPP2R1A,GNAS,NRAS,MAPK1,PPP2R2A,GRM1,PPP2R2B,HRAS,KRAS,PLCL1
Macropinocytosis Signaling	3.1	0.0988	PIK3CA,NRAS,PIK3R1,RAC1,HRAS,FGFR2,KRAS,ATM
Pyridoxal 5'-phosphate Salvage Pathway	2.96	0.108	PDXK,MAP2K4,BRAF,MAPK1,TTK,ACVR2A,DYRK1A
Thrombin Signaling	2.96	0.0637	PIK3CA,NRAS,GNAS,MAPK1,PIK3R1,FGFR2,HRAS,KRAS,GNAI2,PLCL1,GATA3,EGFR,ATM
Lymphotoxin β Receptor Signaling	2.89	0.104	PIK3CA,MAPK1,PIK3R1,CREBBP,FGFR2,EP300,ATM
G Beta Gamma Signaling	2.87	0.0909	GNAI2,GNAS,NRAS,MAPK1,SOS2,HRAS,KRAS,EGFR
Osteoarthritis Pathway	2.85	0.0619	SMAD2,IL1RL1,CREBBP,RAC1,EP300,TGFBR2,MTOR,RUNX2,SMAD4,SOX9,CASP8,CTNNB1,NOTCH1
GADD45 Signaling	2.85	0.211	TP53,CDKN1A,BRCA1,ATM
Role of NFAT in Regulation of the Immune Response	2.81	0.0645	GNAI2,PIK3CA,GNAS,NRAS,MAPK1,PIK3R1,HLA-B,SOS2,HRAS,FGFR2,KRAS,ATM
Apoptosis Signaling	2.81	0.0889	TP53,MAP2K4,NRAS,MAPK1,HRAS,KRAS,CASP8,BCL2L11
EIF2 Signaling	2.66	0.0588	RPL22,PIK3CA,NRAS,MAPK1,PIK3R1,SOS2,HRAS,FGFR2,KRAS,EIF2S2,RPL5,EIF1AX,ATM
Hypoxia Signaling in the Cardiovascular System	2.65	0.0946	TP53,CREBBP,VHL,EP300,UBE2J2,ATM,PTEN
Human Embryonic Stem Cell Pluripotency	2.65	0.0699	TGFBR2,SMAD2,PIK3CA,GNAS,PIK3R1,SMAD4,FGFR2,CTNNB1,APC,ATM
Tec Kinase Signaling	2.62	0.0647	MAP2K4,GNAI2,PIK3CA,JAK1,GNAS,PIK3R1,FGFR2,STAT2,JAK2,ACTG1,ATM
Gαi Signaling	2.62	0.075	GNAI2,GNAS,NRAS,MAPK1,HTR1E,SOS2,HRAS,KRAS,AGTR1
Polyamine Regulation in Colon Cancer	2.62	0.182	MAX,KRAS,CTNNB1,APC
3-phosphoinositide Biosynthesis	2.58	0.0603	PIK3CA,PIK3R1,TRAT1,KIT,FGFR2,PPP4R1,RASA1,PTPN12,DUSP16,ATM,PTEN,EGFR
Sphingosine-1-phosphate Signaling	2.5	0.072	GNAI2,PIK3CA,MAPK1,PIK3R1,RAC1,FGFR2,CASP8,PLCL1,ATM
RANK Signaling in Osteoclasts	2.48	0.0784	MAP2K4,PIK3CA,MAPK1,MAP3K13,PIK3R1,MAP3K1,FGFR2,ATM
Role of JAK1, JAK2 and TYK2 in Interferon Signaling	2.48	0.167	JAK1,STAT2,IFNGR1,JAK2
Superpathway of Inositol Phosphate Compounds	2.46	0.0556	PIK3CA,PIK3R1,TRAT1,FGFR2,INPPL1,PPP4R1,PTPN12,PTEN,KIT,RASA1,DUSP16,EGFR,ATM
Type II Diabetes Mellitus Signaling	2.44	0.0703	MAP2K4,SLC27A5,PIK3CA,MTOR,MAPK1,PIK3R1,MAP3K1,FGFR2,ATM
Role of JAK family kinases in IL-6-type Cytokine Signaling	2.42	0.16	MAP2K4,JAK1,MAPK1,JAK2
PI3K Signaling in B Lymphocytes	2.4	0.0692	PIK3CA,NRAS,MAPK1,PIK3R1,RAC1,HRAS,KRAS,PLCL1,PTEN
Growth Hormone Signaling	2.39	0.0843	PIK3CA,MAPK1,PIK3R1,CEBPA,FGFR2,JAK2,ATM
Leptin Signaling in Obesity	2.3	0.0814	PIK3CA,MAPK1,PIK3R1,FGFR2,JAK2,PLCL1,ATM
ERK5 Signaling	2.27	0.0923	NRAS,CREBBP,HRAS,KRAS,EP300,EGFR
IL-9 Signaling	2.27	0.111	PIK3CA,JAK1,PIK3R1,FGFR2,ATM
iNOS Signaling	2.27	0.111	JAK1,MAPK1,CREBBP,IFNGR1,JAK2
Mitotic Roles of Polo-Like Kinase	2.24	0.0909	PPP2R1A,PPP2R2A,PPP2R2B,CHEK2,STAG2,RAD21
Role of Oct4 in Mammalian Embryonic Stem Cell Pluripotency	2.24	0.109	TP53,RB1,FOXA1,FOXA2,BRCA1
Systemic Lupus Erythematosus Signaling	2.17	0.0533	PIK3CA,MTOR,NRAS,MAPK1,PIK3R1,LSM11,HLA-B,SOS2,HRAS,FGFR2,KRAS,ATM
Role of IL-17A in Arthritis	2.16	0.087	MAP2K4,PIK3CA,MAPK1,PIK3R1,FGFR2,ATM
Reelin Signaling in Neurons	2.16	0.0761	MAP2K4,PIK3CA,PIK3R1,MAPT,FGFR2,DCX,ATM
Factors Promoting Cardiogenesis in Vertebrates	2.16	0.0761	TGFBR2,SMAD2,SMAD4,CTNNB1,ACVR1B,APC,ACVR2A
p38 MAPK Signaling	2.1	0.0672	TP53,MAP2K4,TGFBR2,MAX,IL1RL1,MAPT,CREBBP,EP300
IL-12 Signaling and Production in Macrophages	2.09	0.0616	MAP2K4,PIK3CA,MAPK1,PIK3R1,ZNF668,FGFR2,IFNGR1,EP300,ATM
Salvage Pathways of Pyrimidine Ribonucleotides	2.08	0.0737	MAP2K4,BRAF,MAPK1,AK9,TTK,ACVR2A,DYRK1A
MSP-RON Signaling Pathway	2.08	0.0833	PIK3CA,PIK3R1,FGFR2,JAK2,ACTG1,ATM
Synaptic Long Term Potentiation	2.07	0.0661	NRAS,MAPK1,GRM1,CREBBP,HRAS,KRAS,PLCL1,EP300
Ephrin B Signaling	2.05	0.0822	GNAI2,GNAS,MAPK1,RAC1,HRAS,CTNNB1
iCOS-iCOSL Signaling in T Helper Cells	2.03	0.065	PIK3CA,PIK3R1,HLA-B,RAC1,TRAT1,FGFR2,ATM,PTEN
Circadian Rhythm Signaling	2.01	0.121	PER3,CREBBP,CLOCK,EP300
Inhibition of Angiogenesis by TSP1	1.97	0.118	TP53,MAP2K4,TGFBR2,MAPK1
Relaxin Signaling	1.96	0.0584	BRAF,GNAI2,PIK3CA,GNAS,MAPK1,PDE10A,PIK3R1,FGFR2,ATM
Cholecystokinin/Gastrin-mediated Signaling	1.96	0.0693	MAP2K4,NRAS,MAPK1,SOS2,HRAS,KRAS,EGFR
Actin Nucleation by ARP-WASP Complex	1.9	0.0893	NRAS,SOS2,RAC1,HRAS,KRAS
CD40 Signaling	1.9	0.0759	MAP2K4,PIK3CA,MAPK1,PIK3R1,FGFR2,ATM
Interferon Signaling	1.89	0.111	JAK1,STAT2,IFNGR1,JAK2
DNA damage-induced 14-3-3σ Signaling	1.88	0.158	TP53,BRCA1,ATM
CD28 Signaling in T Helper Cells	1.87	0.0606	MAP2K4,PIK3CA,PIK3R1,HLA-B,MAP3K1,RAC1,FGFR2,ATM
Gαq Signaling	1.85	0.0559	PIK3CA,GNAS,MAPK1,GRM1,PIK3R1,RGS16,FGFR2,AGTR1,ATM
DNA Methylation and Transcriptional Repression Signaling	1.82	0.15	DNMT3A,CHD4,SIN3A
Granzyme A Signaling	1.82	0.15	CREBBP,HMGB2,EP300
Type I Diabetes Mellitus Signaling	1.76	0.0631	MAP2K4,JAK1,MAPK1,HLA-B,IFNGR1,JAK2,CASP8
Aldosterone Signaling in Epithelial Cells	1.74	0.0536	PIK3CA,MAPK1,PIK3R1,SOS2,FGFR2,KRAS,PLCL1,ATM,DNAJC11
α-Adrenergic Signaling	1.72	0.069	GNAI2,GNAS,NRAS,MAPK1,HRAS,KRAS
Protein Kinase A Signaling	1.69	0.0404	GNAS,MAPK1,PTPN14,PDE10A,CREBBP,MAP3K1,PTPN12,PTEN,EP300,TGFBR2,GNAI2,BRAF,SMAD4,PLCL1,CTNNB1,DUSP16
Neuropathic Pain Signaling In Dorsal Horn Neurons	1.69	0.0609	PIK3CA,MAPK1,GRM1,PIK3R1,FGFR2,PLCL1,ATM
Role of Osteoblasts, Osteoclasts and Chondrocytes in Rheumatoid Arthritis	1.69	0.0472	MAP2K4,PIK3CA,MAPK1,RUNX2,IL1RL1,PIK3R1,SMAD4,FGFR2,CTNNB1,APC,ATM
Protein Ubiquitination Pathway	1.68	0.0453	B2M,USP28,PSMC6,HLA-B,USP9X,BAP1,FBXW7,USP46,BRCA1,VHL,UBE2J2,DNAJC11
RhoGDI Signaling	1.68	0.052	ARHGAP5,GNAI2,CDH1,GNAS,CREBBP,RAC1,ARHGAP35,ACTG1,EP300
Pyrimidine Ribonucleotides Interconversion	1.65	0.093	SMARCA1,AK9,ZRANB3,DDX3X
IL-22 Signaling	1.62	0.125	MAP2K4,JAK1,MAPK1
Role of RIG1-like Receptors in Antiviral Innate Immunity	1.62	0.0909	CREBBP,IRF3,CASP8,EP300
Pyrimidine Ribonucleotides De Novo Biosynthesis	1.58	0.0889	SMARCA1,AK9,ZRANB3,DDX3X
IL-17A Signaling in Gastric Cells	1.58	0.12	MAP2K4,MAPK1,EGFR
Chemokine Signaling	1.52	0.0704	GNAI2,NRAS,MAPK1,HRAS,KRAS
Axonal Guidance Signaling	1.52	0.0376	PIK3CA,NRAS,GNAS,MAPK1,PIK3R1,SOS2,RAC1,HRAS,FGFR2,KRAS,MMP2,GNAI2,EPHA5,PLCL1,RASA1,EPHA2,ATM
Signaling by Rho Family GTPases	1.52	0.0444	MAP2K4,GNAI2,CDH1,PIK3CA,GNAS,MAPK1,PIK3R1,RAC1,FGFR2,ACTG1,ATM
FXR/RXR Activation	1.51	0.0556	MAP2K4,SLC27A5,APOH,FOXA1,FOXA2,CREBBP,A1BG
Melatonin Signaling	1.51	0.0694	MAP2K4,BRAF,GNAI2,MAPK1,PLCL1
Role of MAPK Signaling in the Pathogenesis of Influenza	1.51	0.0694	MAP2K4,NRAS,MAPK1,HRAS,KRAS
IL-15 Production	1.46	0.107	JAK1,IRF3,JAK2
Dopamine-DARPP32 Feedback in cAMP Signaling	1.41	0.0491	GNAI2,PPP2R1A,GNAS,PPP2R2A,PPP2R2B,CREBBP,PLCL1,EP300
Docosahexaenoic Acid (DHA) Signaling	1.39	0.0769	PIK3CA,PIK3R1,FGFR2,ATM
CD27 Signaling in Lymphocytes	1.37	0.0755	MAP2K4,MAP3K13,MAP3K1,CASP8
Role of Pattern Recognition Receptors in Recognition of Bacteria and Viruses	1.35	0.0511	MAP2K4,PIK3CA,MAPK1,PIK3R1,FGFR2,IRF3,ATM
Cytotoxic T Lymphocyte-mediated Apoptosis of Target Cells	1.31	0.0938	B2M,HLA-B,CASP8
Amyotrophic Lateral Sclerosis Signaling	1.3	0.0541	TP53,PIK3CA,PIK3R1,RAC1,FGFR2,ATM
Corticotropin Releasing Hormone Signaling	1.3	0.0541	BRAF,GNAI2,GNAS,MAPK1,CREBBP,EP300
Retinoate Biosynthesis I	1.25	0.0882	ALDH8A1,RBP1,ADH4
Spliceosomal Cycle	1.18	0.5	U2AF1/U2AF1L5
Anandamide Degradation	1.18	0.5	FAAH2
Mismatch Repair in Eukaryotes	1.15	0.125	MSH6,MLH1
Activation of IRF by Cytosolic Pattern Recognition Receptors	1.15	0.0635	MAP2K4,CREBBP,STAT2,IRF3
IL-1 Signaling	1.14	0.0543	MAP2K4,GNAI2,GNAS,MAPK1,MAP3K1
Phagosome Formation	1.12	0.0488	PIK3CA,PIK3R1,FGFR2,INPPL1,PLCL1,ATM
Fcγ Receptor-mediated Phagocytosis in Macrophages and Monocytes	1.12	0.0538	MAPK1,PIK3R1,RAC1,ACTG1,PTEN
April Mediated Signaling	1.11	0.0769	MAP2K4,MAPK1,MAP3K1
cAMP-mediated signaling	1.11	0.0404	BRAF,GNAI2,GNAS,MAPK1,PDE10A,HTR1E,CREBBP,AGTR1,EP300
3-phosphoinositide Degradation	1.1	0.0446	INPP4A,INPPL1,PPP4R1,RASA1,PTPN12,DUSP16,PTEN
B Cell Activating Factor Signaling	1.07	0.0732	MAP2K4,MAPK1,MAP3K1
IL-10 Signaling	1.05	0.058	MAP2K4,JAK1,MAPK1,IL1RL1
CCR5 Signaling in Macrophages	1.05	0.058	MAP2K4,GNAI2,GNAS,MAPK1
Remodeling of Epithelial Adherens Junctions	1.05	0.058	CDH1,CTNNB1,ACTG1,APC
D-myo-inositol (1,3,4)-trisphosphate Biosynthesis	1.04	0.105	INPPL1,PTEN
MIF Regulation of Innate Immunity	1.02	0.0698	TP53,MAP2K4,MAPK1
Clathrin-mediated Endocytosis Signaling	1.02	0.0402	PIK3CA,PIK3R1,USP9X,RAC1,FGFR2,ACTG1,ATM,FGF6
Caveolar-mediated Endocytosis Signaling	1.02	0.0563	B2M,HLA-B,ACTG1,EGFR
Role of IL-17F in Allergic Inflammatory Airway Diseases	1	0.0682	MAPK1,CREBBP,EP300
