# Supplementary material for: A general calculus of fitness landscapes finds genes under selection in cancers
Source: HighWire-hosted journal article supplement (doi:10.1101/gr.275811.121), 2022-03-17
Supplement: Supplemental_Table_S9.xlsx [file Supplemental_Table_S9.xlsx]

## Sheet: Table_S9
Table S9. Molecule Cell Function
Categories	Diseases or Functions Annotation	q-Value	Genes	# Genes
Gene Expression	transcription of RNA	4.19e-38	ACVR1B,ACVR2A,AJUBA,APC,ARHGAP35,ARID1A,ARID1B,ARID2,ARMCX3,ASH1L,ASXL1,ASXL2,ATAD2,ATF7IP,ATM,ATRX,BCL9,BCL9L,BCOR,BRAF,BRCA1,BRCA2,BRD7,CASP8,CBFB,CCPG1,CDH1,CDKN1A,CDKN1B,CDKN2A,CEBPA,CHD4,CHD8,CHEK2,CIC,CLOCK,CREBBP,CTCF,CTNNB1,CUL3,DACH1,DCX,DDX17,DDX3X,DNMT3A,DYRK1A,E2F1,EGFR,EGR1,EP300,FBXW7,FGFR2,FOXA1,FOXA2,FOXP1,FOXQ1,FUBP1,GATA3,GNAS,GPS2,HAX1,HMGB2,HOXB7,HOXB9,HRAS,INPPL1,IRF2,IRF3,JA…	165
Gene Expression	expression of RNA	3.17e-34	ACVR1B,ACVR2A,AJUBA,APC,ARHGAP35,ARID1A,ARID1B,ARID2,ARMCX3,ASH1L,ASXL1,ASXL2,ATAD2,ATF7IP,ATM,ATRX,BCL9,BCL9L,BCOR,BRAF,BRCA1,BRCA2,BRD7,CASP8,CBFB,CCPG1,CDH1,CDKN1A,CDKN1B,CDKN2A,CEBPA,CHD4,CHD8,CHEK2,CIC,CLOCK,CREBBP,CTCF,CTNNB1,CUL3,DACH1,DARS,DCX,DDX17,DDX3X,DNMT3A,DYRK1A,E2F1,EGFR,EGR1,EP300,FBXW7,FGFR2,FOXA1,FOXA2,FOXP1,FOXQ1,FUBP1,GATA3,GIGYF2,GNAS,GPS2,HAX1,HMGB2,HOXB7,HOXB9,HRAS,INPPL1,…	176
Gene Expression	transcription	4.03e-34	ACVR1B,ACVR2A,AJUBA,APC,ARHGAP35,ARID1A,ARID1B,ARID2,ARMCX3,ASH1L,ASXL1,ASXL2,ATAD2,ATF7IP,ATM,ATRX,BCL9,BCL9L,BCOR,BRAF,BRCA1,BRCA2,BRD7,CASP8,CBFB,CCPG1,CDH1,CDKN1A,CDKN1B,CDKN2A,CEBPA,CHD4,CHD8,CHEK2,CIC,CLOCK,CREBBP,CTCF,CTNNB1,CUL3,DACH1,DCX,DDX17,DDX3X,DNMT3A,DYRK1A,E2F1,EGFR,EGR1,EP300,FBXW7,FGFR2,FOXA1,FOXA2,FOXP1,FOXQ1,FUBP1,GATA3,GNAS,GPS2,HAX1,HMGB2,HOXB7,HOXB9,HRAS,INPPL1,IRF2,IRF3,JA…	169
Gene Expression	transcription of DNA	3.25e-33	ACVR1B,ACVR2A,AJUBA,ARHGAP35,ARID1A,ARID2,ARMCX3,ASH1L,ASXL1,ASXL2,ATAD2,ATF7IP,ATRX,BCL9,BCL9L,BCOR,BRCA1,BRCA2,BRD7,CBFB,CCPG1,CDH1,CDKN1B,CDKN2A,CEBPA,CHD4,CHD8,CHEK2,CIC,CLOCK,CREBBP,CTCF,CTNNB1,CUL3,DACH1,DDX17,DDX3X,DNMT3A,E2F1,EGFR,EGR1,EP300,FGFR2,FOXA1,FOXA2,FOXP1,FOXQ1,FUBP1,GATA3,GNAS,GPS2,HAX1,HMGB2,HOXB7,HOXB9,HRAS,IRF2,IRF3,JAK2,JMJD1C,KDM5C,KEAP1,KLF5,KMT2A,KMT2D,LMX1B,MAEL,MAP3K1,…	141
Gene Expression	activation of DNA endogenous promoter	6.46e-31	ACVR1B,ACVR2A,AJUBA,ARHGAP35,ARID1A,ARID2,ARMCX3,ASH1L,ASXL1,ASXL2,ATF7IP,ATRX,BCL9,BCL9L,BCOR,BRCA1,BRD7,CBFB,CCPG1,CEBPA,CHD4,CHD8,CIC,CLOCK,CREBBP,CTCF,CTNNB1,CUL3,DACH1,DDX17,DDX3X,DNMT3A,E2F1,EGFR,EGR1,EP300,FGFR2,FOXA1,FOXA2,FOXQ1,FUBP1,GATA3,GNAS,GPS2,HAX1,HMGB2,HOXB7,HOXB9,HRAS,IRF2,IRF3,JAK2,KLF5,KMT2A,KMT2D,LMX1B,MAEL,MAP3K1,MAX,MED23,MEN1,MEPCE,MKL1,MSX2,MYB,MYBL1,NCOR1,NFE2L2,NIPBL,NO…	120
Cell Death and Survival	cell survival	5.52e-25	ABCB1,ABCB5,ABL2,ACVR2A,APC,ARID1A,ARID1B,ATM,ATRX,B2M,BCL2L11,BRAF,BRCA1,BRCA2,BRD7,CASP8,CBFB,CCAR1,CDH1,CDKN1A,CDKN1B,CDKN2A,CEL,CHD4,CHEK2,CLOCK,COL4A3,CREBBP,CSF3R,CTNNB1,CUL3,CX3CL1,CYLD,DCDC2,DDX3X,DYRK1A,E2F1,EGFR,EGR1,EP300,EPHA2,FAT1,FGF6,FGFR2,FLT3,GATA3,GRM1,GTPBP4,HMGB2,HNRNPUL1,HRAS,IDH1,IL1RL1,INPP4A,JAK1,JAK2,JMJD1C,KEAP1,KIT,KLF5,KRAS,LMX1B,MAP2K4,MAP3K1,MAPK1,MAPT,MLH1,MTOR,MYB,…	124
Cell Death and Survival	cell viability	1.15e-24	ABCB1,ABCB5,ABL2,ACVR2A,APC,ARID1A,ARID1B,ATM,ATRX,B2M,BCL2L11,BRAF,BRCA1,BRCA2,BRD7,CASP8,CBFB,CCAR1,CDH1,CDKN1A,CDKN1B,CDKN2A,CEL,CHD4,CHEK2,CLOCK,COL4A3,CREBBP,CTNNB1,CUL3,CX3CL1,CYLD,DCDC2,DYRK1A,E2F1,EGFR,EGR1,EP300,EPHA2,FAT1,FGFR2,FLT3,GATA3,GRM1,GTPBP4,HMGB2,HNRNPUL1,HRAS,IDH1,INPP4A,JAK1,JAK2,JMJD1C,KEAP1,KIT,KLF5,KRAS,LMX1B,MAP2K4,MAP3K1,MAPK1,MAPT,MLH1,MTOR,MYB,NF1,NFE2L2,NOTCH1,NOTCH2…	119
Cell Cycle	interphase	7.02e-23	ABCB1,ACVR1B,APC,ATM,ATRX,BAP1,BRAF,BRCA1,CDH1,CDKN1A,CDKN1B,CDKN2A,CEBPA,CEL,CHEK2,CREBBP,CTNNB1,CUL3,CYLD,DARS,DCX,DDX3X,DYRK1A,E2F1,EGFR,EGR1,EP300,FLT3,GPS2,HRAS,IDH1,JAK2,KIT,KMT2A,KRAS,LATS1,MAPK1,MAX,MEN1,MLH1,MTOR,MYB,MYBL1,NFE2L2,NOTCH1,NOTCH2,NRAS,NRIP1,PGR,PIK3R1,POU4F1,PPM1D,PPP2R2A,PPP6C,PTEN,RAC1,RB1,RB1CC1,RBBP6,REV3L,RPL5,RUNX1,RUNX1T1,RUNX2,SMARCA1,SMARCA2,SMARCA4,SOX9,STK11,TFDP…	77
Cellular Growth and Proliferation, Connective Tissue Development and Function, Tissue Development	proliferation of connective tissue cells	2.67e-22	ACVR2A,AGTR1,APC,ATM,BRAF,BRCA1,BRCA2,CDH1,CDKN1A,CDKN1B,CDKN2A,CEBPA,CTCF,CTNNB1,DACH1,E2F1,EGFR,EP300,EPHA2,FBXW7,FGF6,FGFR2,GATA3,GNAI2,HRAS,HS6ST1,IDH1,IDH2,KDF1,KLF5,KMT2A,KMT2C,KRAS,LATS1,MAP3K1,MAPK1,MEN1,MLH1,MMP2,MSX2,MTOR,NF1,NF2,NFE2L2,NOTCH1,NOTCH2,NRAS,PCGF2,PIK3CA,PPM1D,PTEN,RAC1,RASA1,RB1,REG3G,RHEB,RUNX1,RUNX2,SIN3A,SMAD4,SMARCA4,SPZ1,STK11,TAF4,TGFBR2,TGIF1,TP53,TP63,TSC2,VHL,ZFP…	71
Cellular Development, Cellular Growth and Proliferation	cell proliferation of tumor cell lines	2.19e-21	ABCB1,ABCB5,ABL2,ACVR2A,AGTR1,AJUBA,AMOT,APC,ARID1A,ATAD2,ATM,BAP1,BCL2L11,BRAF,BRCA1,BRCA2,CASP8,CDH1,CDKN1A,CDKN1B,CDKN2A,CEBPA,CEL,CHD4,CHD8,CHEK2,COL4A3,CTCF,CTNNB1,CX3CL1,DACH1,DCX,DDX17,DDX3X,E2F1,EEF1A1,EGFR,EGR1,EP300,EPHA2,ESRP1,FBXL17,FBXW7,FGF6,FGFR2,FLT3,FOXA1,FOXA2,FOXP1,FOXQ1,GNAS,GPS2,GTPBP4,HOXB7,HOXB9,HRAS,IDH2,IRF2,JAK1,JAK2,KEAP1,KIT,KLF5,KMT2A,KMT2D,KRAS,LATS1,MAP2K4,MAPK1,MAX…	128
Cellular Development, Cellular Growth and Proliferation	cell proliferation of tumor cell lines	2.19e-21	ABCB1,ABCB5,ABL2,ACVR2A,AGTR1,AJUBA,AMOT,APC,ARID1A,ATAD2,ATM,BAP1,BCL2L11,BRAF,BRCA1,BRCA2,CASP8,CDH1,CDKN1A,CDKN1B,CDKN2A,CEBPA,CEL,CHD4,CHD8,CHEK2,COL4A3,CTCF,CTNNB1,CX3CL1,DACH1,DCX,DDX17,DDX3X,E2F1,EEF1A1,EGFR,EGR1,EP300,EPHA2,ESRP1,FBXL17,FBXW7,FGF6,FGFR2,FLT3,FOXA1,FOXA2,FOXP1,FOXQ1,GNAS,GPS2,GTPBP4,HOXB7,HOXB9,HRAS,IDH2,IRF2,JAK1,JAK2,KEAP1,KIT,KLF5,KMT2A,KMT2D,KRAS,LATS1,MAP2K4,MAPK1,MAX…	128
Cellular Growth and Proliferation, Tissue Development	proliferation of epithelial cells	3.51e-21	ACVR2A,AGTR1,ANGPTL6,APC,ATM,BRAF,BRCA1,CDH1,CDKN1A,CDKN1B,CDKN2A,CEBPA,COL8A1,CSMD3,CTNNB1,CUL3,CYP7B1,DACH1,E2F1,EGFR,EP300,EPHA2,ESRP1,FBXW7,FGF6,FGFR2,GATA3,HOXB7,HRAS,IFNGR1,JAK2,KDF1,KIT,KLF5,KRAS,MAP2K4,MAPK1,MEN1,MTOR,MYB,NCOR1,NF2,NFE2L2,NOTCH1,NOTCH2,NRAS,NTS,PGR,PIK3CA,PTEN,PTPN12,RB1,REG3G,RUNX1,SMAD2,SMAD4,SOX9,TGFBR2,TP53,TP63,TSC2,VHL,ZFP36L1	63
Cellular Growth and Proliferation	arrest in proliferation of cells	4.14e-21	APC,BRCA1,CDKN1A,CDKN1B,CDKN2A,CEBPA,CTNNB1,E2F1,EGFR,EGR1,EP300,FGFR2,FOXA2,GTPBP4,HRAS,JAK2,MAPK1,MYB,MYBL1,NCOR1,NOTCH1,NOTCH2,NRAS,PIK3CA,POU4F1,PTEN,RB1,RB1CC1,RUNX1,RUNX2,SMAD2,SMAD4,SMARCA4,TGFBR2,TP53,TP53BP1,TP63,USP28,VHL,WT1	40
Cell Cycle	G1 phase	6.89e-20	ACVR1B,APC,ATM,BAP1,BRAF,BRCA1,CDKN1A,CDKN1B,CDKN2A,CEBPA,CEL,CHEK2,CTNNB1,CUL3,CYLD,DARS,DYRK1A,E2F1,EGFR,EP300,FLT3,GPS2,HRAS,JAK2,KIT,KMT2A,KRAS,MAPK1,MEN1,MLH1,MTOR,MYB,NFE2L2,NOTCH1,NOTCH2,PIK3R1,POU4F1,PPP6C,PTEN,RAC1,RB1,RB1CC1,RPL5,RUNX1,RUNX1T1,RUNX2,SMARCA2,STK11,TFDP1,TGFBR2,TP53,TP63,VHL,WT1	54
Cellular Development, Cellular Growth and Proliferation, Hematological System Development and Function, Hematopoiesis, Lymphoid Tissue Structure and Development, Tissue Development	leukopoiesis	7.75e-20	ABL2,APC,ASXL1,ATM,B2M,BCL2L11,BRAF,BRCA1,CASP8,CBFB,CDKN1A,CDKN1B,CDKN2A,CEBPA,CHD4,CLEC4M,CREBBP,CSF3R,CTCF,CTNNB1,CYLD,E2F1,EGR1,EP300,EPHA2,FLT3,FOXP1,GATA3,HAX1,HRAS,IFNGR1,IL1RL1,IRF2,IRF3,JAK1,JAK2,KIT,KLF3,KMT2A,KRAS,MAP2K4,MAPK1,MEN1,MTOR,MYB,MYBL1,NCOR1,NF1,NFE2L2,NOTCH1,NOTCH2,PCGF2,PGR,PIK3R1,PPM1D,PTEN,PTPN12,RAC1,RASA1,RB1,RBP1,RGL2,RPL22,RUNX1,RUNX1T1,RUNX2,SMAD2,SMARCA4,SP3,STAT2,…	81
Cellular Development, Cellular Growth and Proliferation, Hematological System Development and Function, Hematopoiesis, Lymphoid Tissue Structure and Development, Tissue Development	leukopoiesis	7.75e-20	ABL2,APC,ASXL1,ATM,B2M,BCL2L11,BRAF,BRCA1,CASP8,CBFB,CDKN1A,CDKN1B,CDKN2A,CEBPA,CHD4,CLEC4M,CREBBP,CSF3R,CTCF,CTNNB1,CYLD,E2F1,EGR1,EP300,EPHA2,FLT3,FOXP1,GATA3,HAX1,HRAS,IFNGR1,IL1RL1,IRF2,IRF3,JAK1,JAK2,KIT,KLF3,KMT2A,KRAS,MAP2K4,MAPK1,MEN1,MTOR,MYB,MYBL1,NCOR1,NF1,NFE2L2,NOTCH1,NOTCH2,PCGF2,PGR,PIK3R1,PPM1D,PTEN,PTPN12,RAC1,RASA1,RB1,RBP1,RGL2,RPL22,RUNX1,RUNX1T1,RUNX2,SMAD2,SMARCA4,SP3,STAT2,…	81
Cell Death and Survival	cell viability of tumor cell lines	1.13e-19	ABCB1,ABCB5,ACVR2A,ARID1A,ARID1B,ATM,ATRX,B2M,BCL2L11,BRAF,BRCA1,BRCA2,BRD7,CASP8,CCAR1,CDH1,CDKN1A,CDKN1B,CDKN2A,CEL,CHEK2,CTNNB1,DCDC2,DYRK1A,E2F1,EGFR,EP300,EPHA2,FGFR2,GTPBP4,HNRNPUL1,HRAS,IDH1,INPP4A,JAK1,JMJD1C,KIT,KLF5,KRAS,MAP2K4,MAP3K1,MAPK1,MAPT,MLH1,MTOR,MYB,NFE2L2,NOTCH1,NOTCH2,NRAS,PCGF2,PIK3CA,PIK3R1,POU4F1,PPM1D,PPP2R1A,PPP2R2A,PPP2R2B,PPP4R1,PPP6C,PTEN,RAC1,RAD21,RASA1,RB1CC1,REV3…	82
Cell Cycle	arrest in interphase	1.26e-19	ATM,BRAF,BRCA1,CDKN1A,CDKN1B,CDKN2A,CEBPA,CEL,CHEK2,CTNNB1,DCX,E2F1,EGFR,EGR1,EP300,FLT3,GPS2,HRAS,IDH1,JAK2,KMT2A,KRAS,LATS1,MAPK1,MEN1,MLH1,MTOR,MYB,NFE2L2,NOTCH1,NOTCH2,NRAS,PIK3R1,POU4F1,PPP2R2A,PTEN,RB1,RB1CC1,RBBP6,REV3L,RPL5,RUNX1,RUNX1T1,SMARCA1,SMARCA2,SMARCA4,SOX9,STK11,TFDP1,TGFBR2,TP53,TP53BP1,TP63,UBQLN2,VHL,WT1	56
Cell Cycle, Gene Expression	binding of DNA	4.89e-19	APOH,ATM,BRAF,BRCA1,BRCA2,BRD7,CBFB,CCAR1,CDKN1A,CDKN2A,CEBPA,CREBBP,CTNNB1,E2F1,EGFR,EGR1,EP300,FOXA1,FOXA2,FOXP1,GATA3,GNAS,HMGB2,HRAS,IRF3,JAK1,JAK2,KEAP1,KLF5,KMT2D,KRAS,MAP3K1,MAPK1,MAPT,MAX,MGA,MYB,NCOR1,NF1,NFE2L2,NOTCH1,NRAS,NTS,PGR,PSIP1,PTEN,RAC1,RAD21,RB1,RBBP6,RUNX1,RUNX1T1,RUNX2,SMAD4,SMARCA4,SOX9,SPZ1,STK11,TFDP1,TP53,TP63	61
Cell Cycle, Gene Expression	binding of DNA	4.89e-19	APOH,ATM,BRAF,BRCA1,BRCA2,BRD7,CBFB,CCAR1,CDKN1A,CDKN2A,CEBPA,CREBBP,CTNNB1,E2F1,EGFR,EGR1,EP300,FOXA1,FOXA2,FOXP1,GATA3,GNAS,HMGB2,HRAS,IRF3,JAK1,JAK2,KEAP1,KLF5,KMT2D,KRAS,MAP3K1,MAPK1,MAPT,MAX,MGA,MYB,NCOR1,NF1,NFE2L2,NOTCH1,NRAS,NTS,PGR,PSIP1,PTEN,RAC1,RAD21,RB1,RBBP6,RUNX1,RUNX1T1,RUNX2,SMAD4,SMARCA4,SOX9,SPZ1,STK11,TFDP1,TP53,TP63	61
Cell Cycle	cell cycle progression	5.56e-19	AJUBA,AMER1,APC,ARID1A,ATM,BAP1,BCL2L11,BRAF,BRCA1,BRCA2,CCPG1,CDH1,CDKN1A,CDKN1B,CDKN2A,CEBPA,CHD4,CHEK2,CREBBP,CTNNB1,CUL3,CYLD,DDX17,E2F1,EGFR,EGR1,EP300,FBXW7,FGFR2,FLT3,FOXA1,GATA3,GPS2,GTPBP4,HRAS,JAK2,KIT,KLF5,KMT2A,KRAS,LATS1,MAP2K4,MAP3K1,MAPK1,MAX,MEN1,MLH1,MTOR,MYB,NCOR1,NF1,NF2,NOTCH1,NOTCH2,NRAS,PBRM1,PCGF2,PER3,PGR,PIK3CA,PIK3R1,PPM1D,PPP2R1A,PPP2R2A,PPP2R2B,PTEN,RAC1,RAD21,RB1,RUNX…	93
Cellular Development	differentiation of tumor cell lines	4.3e-18	ABCB5,AJUBA,ATM,BRAF,CBFB,CDKN1A,CDKN1B,CEBPA,CNOT9,CREBBP,CTCF,CTNNB1,DYRK1A,E2F1,EGFR,EGR1,EP300,FGFR2,FLT3,FOXA1,FOXP1,GATA3,HRAS,JAK1,KEAP1,KIT,KMT2A,KRAS,MAPK1,MAX,MTOR,MYB,NCOR1,NFE2L2,NOTCH1,PIK3R1,PTEN,RAC1,RB1,RUNX1,RUNX1T1,RUNX2,SMAD2,SMAD4,SMARCA4,TP53,TP63,TSC2,VHL,WT1	50
Cellular Development, Cellular Growth and Proliferation, Embryonic Development, Hematological System Development and Function, Hematopoiesis, Lymphoid Tissue Structure and Development, Organ Development, Organismal Development, Tissue Development	lymphopoiesis	8.29e-18	ABL2,APC,ASXL1,ATM,B2M,BCL2L11,BRAF,BRCA1,CASP8,CBFB,CDKN1A,CDKN1B,CDKN2A,CEBPA,CHD4,CREBBP,CSF3R,CTCF,CTNNB1,CYLD,E2F1,EGR1,EP300,EPHA2,FLT3,FOXP1,GATA3,HRAS,IFNGR1,IL1RL1,IRF2,IRF3,JAK1,KIT,KLF3,KRAS,MAP2K4,MAPK1,MEN1,MTOR,MYB,NCOR1,NF1,NOTCH1,NOTCH2,PCGF2,PGR,PIK3R1,PTEN,PTPN12,RAC1,RB1,RPL22,RUNX1,RUNX2,SMAD2,SMARCA4,SP3,STAT2,STK11,TCF12,TGFBR2,TP53,TP53BP1,TP63,TRAT1,TSC1,WT1,ZFP36L1	69
Cellular Development, Cellular Growth and Proliferation, Embryonic Development, Hematological System Development and Function, Hematopoiesis, Lymphoid Tissue Structure and Development, Organ Development, Organismal Development, Tissue Development	lymphopoiesis	8.29e-18	ABL2,APC,ASXL1,ATM,B2M,BCL2L11,BRAF,BRCA1,CASP8,CBFB,CDKN1A,CDKN1B,CDKN2A,CEBPA,CHD4,CREBBP,CSF3R,CTCF,CTNNB1,CYLD,E2F1,EGR1,EP300,EPHA2,FLT3,FOXP1,GATA3,HRAS,IFNGR1,IL1RL1,IRF2,IRF3,JAK1,KIT,KLF3,KRAS,MAP2K4,MAPK1,MEN1,MTOR,MYB,NCOR1,NF1,NOTCH1,NOTCH2,PCGF2,PGR,PIK3R1,PTEN,PTPN12,RAC1,RB1,RPL22,RUNX1,RUNX2,SMAD2,SMARCA4,SP3,STAT2,STK11,TCF12,TGFBR2,TP53,TP53BP1,TP63,TRAT1,TSC1,WT1,ZFP36L1	69
Cell Cycle	senescence of cells	9.34e-18	ARHGAP5,ATM,BRAF,BRCA1,BRD7,CDKN1A,CDKN1B,CDKN2A,CHEK2,CTNNB1,DYRK1A,E2F1,EGFR,EGR1,EP300,FGFR2,HRAS,KRAS,MAP2K4,MAPK1,MTOR,NFE2L2,NRAS,PBRM1,PCGF2,PPM1D,PTEN,RAC1,RB1,RHEB,RUNX1,SMARCA4,SOX9,STK11,TBX3,TGFBR2,TP53,TP63,TSC2,TSC22D1,VHL,WT1	42
Cell Cycle, Gene Expression	binding of protein binding site	1.14e-17	ATM,BRCA1,BRD7,CBFB,CCAR1,CEBPA,CREBBP,E2F1,EGFR,EGR1,EP300,FOXA1,FOXA2,GATA3,GNAS,HRAS,IRF3,JAK1,JAK2,KLF5,KRAS,MAP3K1,MAPK1,MAX,MYB,NFE2L2,NOTCH1,NRAS,NTS,PGR,PTEN,RAC1,RBBP6,RUNX1,RUNX2,SMAD4,SMARCA4,SOX9,SPZ1,STK11,TFDP1,TP53	42
Cellular Development, Cellular Growth and Proliferation, Hematological System Development and Function, Hematopoiesis, Lymphoid Tissue Structure and Development, Tissue Development	hematopoiesis of mononuclear leukocytes	1.14e-17	ABL2,APC,ASXL1,ATM,B2M,BCL2L11,BRAF,BRCA1,CASP8,CBFB,CDKN1A,CDKN1B,CDKN2A,CEBPA,CHD4,CLEC4M,CREBBP,CSF3R,CTCF,CTNNB1,CYLD,E2F1,EGR1,EP300,EPHA2,FLT3,FOXP1,GATA3,HRAS,IFNGR1,IL1RL1,IRF2,IRF3,JAK1,KIT,KLF3,KRAS,MAP2K4,MAPK1,MEN1,MTOR,MYB,NCOR1,NF1,NOTCH1,NOTCH2,PCGF2,PGR,PIK3R1,PTEN,PTPN12,RAC1,RASA1,RB1,RPL22,RUNX1,RUNX2,SMAD2,SMARCA4,SP3,STAT2,STK11,TCF12,TGFBR2,TP53,TP53BP1,TP63,TRAT1,TSC1,WT1,Z…	71
Cellular Development, Cellular Growth and Proliferation, Hematological System Development and Function, Hematopoiesis, Lymphoid Tissue Structure and Development, Tissue Development	hematopoiesis of mononuclear leukocytes	1.14e-17	ABL2,APC,ASXL1,ATM,B2M,BCL2L11,BRAF,BRCA1,CASP8,CBFB,CDKN1A,CDKN1B,CDKN2A,CEBPA,CHD4,CLEC4M,CREBBP,CSF3R,CTCF,CTNNB1,CYLD,E2F1,EGR1,EP300,EPHA2,FLT3,FOXP1,GATA3,HRAS,IFNGR1,IL1RL1,IRF2,IRF3,JAK1,KIT,KLF3,KRAS,MAP2K4,MAPK1,MEN1,MTOR,MYB,NCOR1,NF1,NOTCH1,NOTCH2,PCGF2,PGR,PIK3R1,PTEN,PTPN12,RAC1,RASA1,RB1,RPL22,RUNX1,RUNX2,SMAD2,SMARCA4,SP3,STAT2,STK11,TCF12,TGFBR2,TP53,TP53BP1,TP63,TRAT1,TSC1,WT1,Z…	71
Cell Cycle, Gene Expression	binding of protein binding site	1.14e-17	ATM,BRCA1,BRD7,CBFB,CCAR1,CEBPA,CREBBP,E2F1,EGFR,EGR1,EP300,FOXA1,FOXA2,GATA3,GNAS,HRAS,IRF3,JAK1,JAK2,KLF5,KRAS,MAP3K1,MAPK1,MAX,MYB,NFE2L2,NOTCH1,NRAS,NTS,PGR,PTEN,RAC1,RBBP6,RUNX1,RUNX2,SMAD4,SMARCA4,SOX9,SPZ1,STK11,TFDP1,TP53	42
Cell Death and Survival	apoptosis	1.27e-17	ABCB1,ABL2,ACVR1B,AGTR1,AMER1,AMOT,APC,ARHGAP35,ATAD2,ATM,ATRX,B2M,BAP1,BCL2L11,BMF,BRAF,BRCA1,BRCA2,CASP8,CBFB,CCAR1,CDH1,CDKN1A,CDKN1B,CDKN2A,CEBPA,CHD8,CHEK2,COL25A1,COL4A3,CPEB2,CREBBP,CSF3R,CTCF,CTNNB1,CUL3,CX3CL1,CYLD,DACH1,DDX17,DDX3X,DMC1,DNMT3A,DYNAP,E2F1,EEF1A1,EGFR,EGR1,EP300,EPHA2,FBXW7,FGFR2,FLT3,FOXA2,FOXP1,FUBP1,GATA3,GNAI2,GNAS,GPS2,GRM1,HAX1,HLA-B,HOXB9,HPGDS,HRAS,IFNGR1,IL1RL1,I…	163
Cell-mediated Immune Response, Cellular Development, Cellular Function and Maintenance, Cellular Growth and Proliferation, Embryonic Development, Hematological System Development and Function, Hematopoiesis, Lymphoid Tissue Structure and Development, Organ Development, Organismal Development, Tissue Development	T cell development	1.65e-17	ABL2,APC,ATM,B2M,BCL2L11,BRAF,BRCA1,CBFB,CDKN1A,CDKN1B,CDKN2A,CEBPA,CHD4,CREBBP,CTNNB1,CYLD,E2F1,EGR1,EP300,EPHA2,FOXP1,GATA3,HRAS,IFNGR1,IL1RL1,IRF2,IRF3,JAK1,KIT,MAP2K4,MAPK1,MEN1,MTOR,MYB,NCOR1,NF1,NOTCH1,NOTCH2,PCGF2,PGR,PIK3R1,PTEN,RAC1,RB1,RPL22,RUNX1,RUNX2,SMAD2,SMARCA4,SP3,STAT2,STK11,TCF12,TGFBR2,TP53,TP63,TRAT1,TSC1,WT1,ZFP36L1	60
Cell-mediated Immune Response, Cellular Development, Cellular Function and Maintenance, Cellular Growth and Proliferation, Embryonic Development, Hematological System Development and Function, Hematopoiesis, Lymphoid Tissue Structure and Development, Organ Development, Organismal Development, Tissue Development	T cell development	1.65e-17	ABL2,APC,ATM,B2M,BCL2L11,BRAF,BRCA1,CBFB,CDKN1A,CDKN1B,CDKN2A,CEBPA,CHD4,CREBBP,CTNNB1,CYLD,E2F1,EGR1,EP300,EPHA2,FOXP1,GATA3,HRAS,IFNGR1,IL1RL1,IRF2,IRF3,JAK1,KIT,MAP2K4,MAPK1,MEN1,MTOR,MYB,NCOR1,NF1,NOTCH1,NOTCH2,PCGF2,PGR,PIK3R1,PTEN,RAC1,RB1,RPL22,RUNX1,RUNX2,SMAD2,SMARCA4,SP3,STAT2,STK11,TCF12,TGFBR2,TP53,TP63,TRAT1,TSC1,WT1,ZFP36L1	60
Cell Death and Survival	anoikis	2.44e-17	BCL2L11,BMF,CASP8,CDH1,CDKN2A,CPEB2,CTNNB1,E2F1,EEF1A1,EGFR,EPHA2,HRAS,KRAS,MAP3K1,MAPK1,MTOR,NRAS,PIK3CA,PTEN,RAC1,RB1,SMAD4,STK11,TFDP1,TP53,TSC2,WT1	27
Cell Death and Survival	cell death of blood cells	2.71e-17	ABCB1,APC,ATM,BCL2L11,BMF,BRCA1,CASP8,CBFB,CCAR1,CDKN1A,CDKN1B,CDKN2A,CEBPA,CHEK2,CLOCK,CREBBP,CTNNB1,CX3CL1,CYLD,E2F1,EGFR,EGR1,EP300,FBXW7,FLT3,FOXP1,GATA3,GNAS,HAX1,HRAS,IFNGR1,IL1RL1,IRF2,IRF3,JAK1,JAK2,KIT,KMT2A,KRAS,LAMTOR2,LGALS2,MAP2K4,MTOR,MYB,NF1,NFE2L2,NOTCH1,NRAS,PIK3CA,PIK3R1,PPM1D,PPP2R2B,PTEN,RAC1,RASA1,RB1,RUNX1,SF3B1,SMAD4,SMARCA4,SOX17,STK11,TFDP1,TGFBR2,TP53,TSC1,USP9X,VHL,WT1	69
Cell Cycle, Cellular Development, Connective Tissue Development and Function	senescence of fibroblast cell lines	3.93e-17	ARHGAP5,ATM,BRAF,BRD7,CDKN1A,CDKN2A,CTNNB1,DYRK1A,E2F1,EGR1,EP300,FGFR2,HRAS,KRAS,MAPK1,NFE2L2,NRAS,PBRM1,PPM1D,PTEN,RAC1,RB1,RHEB,SOX9,TBX3,TP53,TSC22D1,VHL	28
Cell Cycle, Cellular Development, Connective Tissue Development and Function	senescence of fibroblast cell lines	3.93e-17	ARHGAP5,ATM,BRAF,BRD7,CDKN1A,CDKN2A,CTNNB1,DYRK1A,E2F1,EGR1,EP300,FGFR2,HRAS,KRAS,MAPK1,NFE2L2,NRAS,PBRM1,PPM1D,PTEN,RAC1,RB1,RHEB,SOX9,TBX3,TP53,TSC22D1,VHL	28
Cellular Development, Cellular Growth and Proliferation, Connective Tissue Development and Function	proliferation of fibroblast cell lines	4.6e-17	ABL2,ATM,BRCA1,CDKN1A,CDKN1B,CDKN2A,CEBPA,CTNNB1,DACH1,DDX3X,E2F1,EGFR,EGR1,FBXW7,FGFR2,GNAI2,GTPBP4,HRAS,HRASLS,INPP4A,IRF2,IRF3,KIT,KLF5,KMT2A,KRAS,MAP3K1,MAPK1,MAX,MEN1,MTOR,NF2,NOTCH1,NRAS,PIK3CA,PIK3R1,PPM1D,PTEN,RAC1,RB1,RHEB,RUNX1,RUNX1T1,RUNX2,SMARCA2,SOX9,SPZ1,TGIF1,TP53,TSC1,TSC2,WT1	52
Cellular Development, Cellular Growth and Proliferation, Connective Tissue Development and Function	proliferation of fibroblast cell lines	4.6e-17	ABL2,ATM,BRCA1,CDKN1A,CDKN1B,CDKN2A,CEBPA,CTNNB1,DACH1,DDX3X,E2F1,EGFR,EGR1,FBXW7,FGFR2,GNAI2,GTPBP4,HRAS,HRASLS,INPP4A,IRF2,IRF3,KIT,KLF5,KMT2A,KRAS,MAP3K1,MAPK1,MAX,MEN1,MTOR,NF2,NOTCH1,NRAS,PIK3CA,PIK3R1,PPM1D,PTEN,RAC1,RB1,RHEB,RUNX1,RUNX1T1,RUNX2,SMARCA2,SOX9,SPZ1,TGIF1,TP53,TSC1,TSC2,WT1	52
Gene Expression	transactivation	8.13e-17	ACVR1B,ACVR2A,APC,ARID1A,ASXL1,BRCA1,BRCA2,CDH1,CDKN2A,CEBPA,CHD4,CREBBP,CTNNB1,E2F1,EGR1,EP300,GATA3,HOXB7,HRAS,IRF2,IRF3,JAK1,KLF5,KMT2A,MAPK1,MAX,MDFIC,MEN1,MSX2,MYB,MYBL1,NCOR1,NFE2L2,NOTCH1,NOTCH2,NRAS,NRIP1,PGR,PIK3CA,PIK3R1,PTEN,RAC1,RB1,RUNX1,RUNX2,SMAD2,SMAD4,SMARCA2,SMARCA4,STAT2,STK11,TAF4,TBL1XR1,TFDP1,TGIF1,TLE1,TP53,TP53BP1,TP63,VHL,WT1	61
Cell Cycle	interphase of tumor cell lines	9.35e-17	APC,ATM,BAP1,BRAF,BRCA1,CDH1,CDKN1A,CDKN1B,CDKN2A,CEBPA,CEL,CHEK2,CTNNB1,DARS,DCX,E2F1,EGFR,EP300,FLT3,GPS2,HRAS,JAK2,KIT,KRAS,LATS1,MLH1,MTOR,MYB,NFE2L2,NOTCH1,NOTCH2,NRIP1,PGR,POU4F1,PPP2R2A,PTEN,RB1,RB1CC1,REV3L,RPL5,SMARCA1,SOX9,STK11,TFDP1,TP53,TP53BP1,TP63,VHL,WT1	49
Cellular Development, Cellular Growth and Proliferation, Hematological System Development and Function, Hematopoiesis, Tissue Development	development of hematopoietic cells	1.19e-16	B2M,BCL2L11,BRCA1,CBFB,CDKN1A,CDKN1B,CSF3R,CTNNB1,E2F1,EGFR,EGR1,FLT3,GATA3,HMGB2,IFNGR1,JAK1,JAK2,KIT,MKL1,MTOR,MYB,NCOR1,NOTCH1,NRAS,PIK3R1,PTEN,RAC1,RB1,RPL22,RUNX1,SMARCA4,SOX17,SP3,STK11,TCF12,TP53,TRAT1,U2AF1/U2AF1L5,WT1	39
Cellular Development, Cellular Growth and Proliferation, Hematological System Development and Function, Hematopoiesis, Tissue Development	development of hematopoietic cells	1.19e-16	B2M,BCL2L11,BRCA1,CBFB,CDKN1A,CDKN1B,CSF3R,CTNNB1,E2F1,EGFR,EGR1,FLT3,GATA3,HMGB2,IFNGR1,JAK1,JAK2,KIT,MKL1,MTOR,MYB,NCOR1,NOTCH1,NRAS,PIK3R1,PTEN,RAC1,RB1,RPL22,RUNX1,SMARCA4,SOX17,SP3,STK11,TCF12,TP53,TRAT1,U2AF1/U2AF1L5,WT1	39
Cellular Development, Cellular Growth and Proliferation, Hematological System Development and Function, Hematopoiesis	proliferation of hematopoietic progenitor cells	1.63e-16	APC,CBFB,CDKN1A,CDKN1B,CDKN2A,CEBPA,CSF3R,CTCF,CTNNB1,EGFR,EGR1,FLT3,FUBP1,GATA3,HOXB7,HRAS,INPP4A,JAK2,JMJD1C,KIT,KMT2A,KRAS,MAP2K4,MYB,MYH9,NF1,NOTCH1,NRAS,PCGF2,PIK3R1,PTEN,RUNX1,RUNX1T1,SF3B1,SMAD4,SMARCA4,TCF12,TP53,WT1	39
Cellular Development, Cellular Growth and Proliferation, Hematological System Development and Function, Hematopoiesis	proliferation of hematopoietic progenitor cells	1.63e-16	APC,CBFB,CDKN1A,CDKN1B,CDKN2A,CEBPA,CSF3R,CTCF,CTNNB1,EGFR,EGR1,FLT3,FUBP1,GATA3,HOXB7,HRAS,INPP4A,JAK2,JMJD1C,KIT,KMT2A,KRAS,MAP2K4,MYB,MYH9,NF1,NOTCH1,NRAS,PCGF2,PIK3R1,PTEN,RUNX1,RUNX1T1,SF3B1,SMAD4,SMARCA4,TCF12,TP53,WT1	39
Cellular Development, Cellular Growth and Proliferation, Reproductive System Development and Function	cell proliferation of breast cell lines	1.95e-16	ATM,BCL2L11,BMF,BRCA1,BRCA2,CDH1,CDKN1A,EGFR,EPHA2,FBXW7,FGFR2,HRAS,JAK2,KLF5,KRAS,MTOR,NOTCH1,PGR,PIK3CA,PIK3R1,PTEN,PTPN14,RAC1,RB1,RUNX2,TBX3,TP63,WT1	28
Cellular Development, Cellular Growth and Proliferation, Reproductive System Development and Function	cell proliferation of breast cell lines	1.95e-16	ATM,BCL2L11,BMF,BRCA1,BRCA2,CDH1,CDKN1A,EGFR,EPHA2,FBXW7,FGFR2,HRAS,JAK2,KLF5,KRAS,MTOR,NOTCH1,PGR,PIK3CA,PIK3R1,PTEN,PTPN14,RAC1,RB1,RUNX2,TBX3,TP63,WT1	28
Cellular Development, Cellular Growth and Proliferation, Hematological System Development and Function, Hematopoiesis	proliferation of hematopoietic cells	1.96e-16	APC,CBFB,CDKN1A,CDKN1B,CDKN2A,CEBPA,CSF3R,CTCF,CTNNB1,EGFR,EGR1,FLT3,FUBP1,GATA3,HOXB7,HRAS,INPP4A,JAK1,JAK2,JMJD1C,KIT,KMT2A,KRAS,MAP2K4,MYB,MYH9,NF1,NOTCH1,NRAS,PCGF2,PIK3R1,PTEN,RUNX1,RUNX1T1,SF3B1,SMAD4,SMARCA4,TCF12,TP53,WT1	40
Cellular Development, Cellular Growth and Proliferation, Hematological System Development and Function, Hematopoiesis	proliferation of hematopoietic cells	1.96e-16	APC,CBFB,CDKN1A,CDKN1B,CDKN2A,CEBPA,CSF3R,CTCF,CTNNB1,EGFR,EGR1,FLT3,FUBP1,GATA3,HOXB7,HRAS,INPP4A,JAK1,JAK2,JMJD1C,KIT,KMT2A,KRAS,MAP2K4,MYB,MYH9,NF1,NOTCH1,NRAS,PCGF2,PIK3R1,PTEN,RUNX1,RUNX1T1,SF3B1,SMAD4,SMARCA4,TCF12,TP53,WT1	40
Cellular Development, Cellular Growth and Proliferation, Hematological System Development and Function, Hematopoiesis, Tissue Development	development of hematopoietic progenitor cells	2.63e-16	B2M,BCL2L11,BRCA1,CBFB,CDKN1A,CDKN1B,CSF3R,CTNNB1,E2F1,EGFR,EGR1,FLT3,GATA3,HMGB2,IFNGR1,JAK2,KIT,MKL1,MTOR,MYB,NCOR1,NOTCH1,NRAS,PIK3R1,PTEN,RAC1,RB1,RPL22,RUNX1,SMARCA4,SOX17,SP3,STK11,TCF12,TP53,TRAT1,U2AF1/U2AF1L5,WT1	38
Cellular Development, Cellular Growth and Proliferation, Hematological System Development and Function, Hematopoiesis, Tissue Development	development of hematopoietic progenitor cells	2.63e-16	B2M,BCL2L11,BRCA1,CBFB,CDKN1A,CDKN1B,CSF3R,CTNNB1,E2F1,EGFR,EGR1,FLT3,GATA3,HMGB2,IFNGR1,JAK2,KIT,MKL1,MTOR,MYB,NCOR1,NOTCH1,NRAS,PIK3R1,PTEN,RAC1,RB1,RPL22,RUNX1,SMARCA4,SOX17,SP3,STK11,TCF12,TP53,TRAT1,U2AF1/U2AF1L5,WT1	38
Cell Cycle	arrest in G1 phase	2.65e-16	BRAF,BRCA1,CDKN1A,CDKN1B,CDKN2A,CEBPA,CEL,CHEK2,E2F1,EGFR,EP300,FLT3,GPS2,HRAS,JAK2,KMT2A,MAPK1,MEN1,MLH1,MTOR,MYB,NFE2L2,NOTCH1,NOTCH2,POU4F1,PTEN,RB1,RB1CC1,RPL5,RUNX1,RUNX1T1,SMARCA2,STK11,TFDP1,TGFBR2,TP53,TP63,VHL,WT1	39
Cellular Development, Tissue Development	differentiation of epithelial cells	2.9e-16	ABL2,APC,BRAF,BRCA1,CDH1,CDKN1A,CDKN1B,CDKN2A,CEBPA,CREBBP,CTNNB1,CYLD,EGFR,EP300,EPHA2,FBXW7,FGFR2,FOXA1,FOXA2,KDF1,KEAP1,KIT,KLF5,KRAS,LATS1,MKL1,MSX2,MYB,NOTCH1,NOTCH2,RAC1,REG3G,RUNX2,SMAD4,SMARCA4,SOX9,TBX3,TP53,TP63,USP28,VHL,WT1,ZFP36L1	43
Cellular Development, Cellular Growth and Proliferation, Hair and Skin Development and Function	proliferation of epithelial cell lines	4.31e-16	ABL2,BRAF,BRCA2,CDKN1A,CDKN1B,CDKN2A,CEBPA,CTCF,CTNNB1,E2F1,EGFR,EGR1,FGFR2,GNAI2,HRAS,JAK2,KMT2A,KRAS,MMP2,MTOR,NOTCH1,NRAS,NTS,PIK3CA,PPP2R1A,PTEN,RAC1,RB1,RUNX2,TFDP1,TGFBR2,TP53,TP53BP1,TP63,TSC1,USP28,WT1	37
Cellular Development, Cellular Growth and Proliferation, Hair and Skin Development and Function	proliferation of epithelial cell lines	4.31e-16	ABL2,BRAF,BRCA2,CDKN1A,CDKN1B,CDKN2A,CEBPA,CTCF,CTNNB1,E2F1,EGFR,EGR1,FGFR2,GNAI2,HRAS,JAK2,KMT2A,KRAS,MMP2,MTOR,NOTCH1,NRAS,NTS,PIK3CA,PPP2R1A,PTEN,RAC1,RB1,RUNX2,TFDP1,TGFBR2,TP53,TP53BP1,TP63,TSC1,USP28,WT1	37
Cellular Growth and Proliferation	colony formation of cells	4.85e-16	BCL2L11,BRAF,BRCA1,CDKN1A,CDKN1B,CDKN2A,CEBPA,CREBBP,CSF3R,CTCF,CTNNB1,DDX3X,E2F1,EGFR,EGR1,EPHA2,FGFR2,FLT3,FOXA2,GNAI2,HOXB7,HRAS,IRF3,JAK2,KIT,KMT2A,KRAS,MAP3K1,MAPK1,MEN1,MMP2,MSX2,MYB,NF1,NF2,NOTCH1,NOTCH2,NRAS,PCGF2,PGR,PIK3CA,PIK3R1,PTEN,RAC1,RB1,RB1CC1,RUNX1,RUNX1T1,RUNX2,SPZ1,TBX3,TP53,TP63,TSC2,VHL,WT1	56
Cellular Development, Cellular Growth and Proliferation	proliferation of stem cells	6.75e-16	ABCB1,ATM,BRCA1,CDKN1A,CDKN1B,CDKN2A,CTNNB1,E2F1,EGFR,FGFR2,HMGB2,JAK2,KIT,KLF5,KRAS,MAP3K1,MEN1,MYB,NF1,NF2,PIK3R1,PPM1D,PTEN,RB1,RNF43,RUNX1,SMARCA4,SOX17,TP53,TP63,TSC1,TSC2,VHL,ZFP36L1	34
Cellular Development, Cellular Growth and Proliferation	proliferation of stem cells	6.75e-16	ABCB1,ATM,BRCA1,CDKN1A,CDKN1B,CDKN2A,CTNNB1,E2F1,EGFR,FGFR2,HMGB2,JAK2,KIT,KLF5,KRAS,MAP3K1,MEN1,MYB,NF1,NF2,PIK3R1,PPM1D,PTEN,RB1,RNF43,RUNX1,SMARCA4,SOX17,TP53,TP63,TSC1,TSC2,VHL,ZFP36L1	34
Cell Cycle	arrest in cell cycle progression	6.91e-16	AMER1,APC,ARID1A,ATM,BRCA1,CDH1,CDKN1A,CDKN1B,CDKN2A,CEBPA,CHEK2,CREBBP,CTNNB1,CUL3,DDX17,E2F1,EGFR,EP300,FOXA1,HRAS,KMT2A,KRAS,MAPK1,MEN1,MLH1,MTOR,NOTCH1,NOTCH2,PCGF2,PPM1D,PTEN,RAC1,RB1,RUNX1,RUNX1T1,RUNX2,SMARCA2,SMARCA4,STK11,TFDP1,TP53,TP63,VHL,ZFHX3	44
Cellular Development, Tissue Development	differentiation of epithelial tissue	1.33e-15	ABL2,APC,BRAF,BRCA1,CDH1,CDKN1A,CDKN1B,CDKN2A,CEBPA,CREBBP,CTNNB1,CYLD,EGFR,EP300,EPHA2,FBXW7,FGFR2,FOXA1,FOXA2,KDF1,KEAP1,KIT,KLF5,KRAS,LATS1,MKL1,MSX2,MYB,NOTCH1,NOTCH2,PTEN,RAC1,REG3G,RUNX2,SMAD4,SMARCA4,SOX17,SOX9,STK11,TBX3,TP53,TP63,USP28,VHL,WT1,ZFP36L1	46
Cell Death and Survival	apoptosis of tumor cell lines	1.56e-15	ABCB1,ABL2,ACVR1B,AMER1,APC,ATAD2,ATM,B2M,BAP1,BCL2L11,BMF,BRAF,BRCA1,BRCA2,CASP8,CCAR1,CDH1,CDKN1A,CDKN1B,CDKN2A,CEBPA,CHEK2,CPEB2,CREBBP,CTCF,CTNNB1,CYLD,E2F1,EEF1A1,EGFR,EGR1,EP300,EPHA2,FGFR2,FLT3,FOXA2,FUBP1,GNAS,GPS2,HAX1,HOXB9,HRAS,IL1RL1,IRF3,JAK1,JAK2,KIT,KLF5,KMT2A,KRAS,LATS1,MAP2K4,MAP3K1,MAPK1,MAPT,MAX,MEN1,MLH1,MTOR,MYB,MYBL1,NF1,NFE2L2,NOTCH1,NOTCH2,NRAS,PGR,PIK3CA,POU4F1,PPM1D,PPP2…	96
Gene Expression	repression of RNA	2.49e-15	AJUBA,BCOR,BRCA1,CBFB,CDKN2A,CNOT9,CUL3,DACH1,E2F1,FLT3,HMGB2,KLF3,MAX,NCOR1,NR1D2,NRIP1,PGR,RB1,RUNX1,RUNX1T1,RUNX2,SIN3A,SMARCA2,SMARCA4,SPOP,TAF1,TGIF1,TLE1,TP53,TSC22D1,WT1	31
Cellular Growth and Proliferation	cytostasis of tumor cell lines	2.71e-15	BAP1,BRCA1,CDH1,CDKN1A,CDKN1B,CHEK2,CTNNB1,EGFR,EGR1,IRF2,JAK2,KRAS,LATS1,NF2,NOTCH1,NRAS,PTEN,RB1,RB1CC1,SMAD2,SMAD4,SMARCA1,SMARCA2,SMARCA4,TGFBR2,TP53,TP63,TSC2,WT1	29
Cell Cycle	arrest in interphase of tumor cell lines	2.74e-15	ATM,BRAF,BRCA1,CDKN1A,CDKN1B,CDKN2A,CEBPA,CEL,CHEK2,CTNNB1,DCX,E2F1,EGFR,EP300,FLT3,GPS2,HRAS,JAK2,LATS1,MLH1,MTOR,NFE2L2,NOTCH1,NOTCH2,POU4F1,PPP2R2A,PTEN,RB1,RB1CC1,REV3L,RPL5,SMARCA1,SOX9,STK11,TP53,TP53BP1,TP63,VHL,WT1	39
Gene Expression	transactivation of RNA	4.3e-15	ACVR1B,ACVR2A,APC,ARID1A,ASXL1,BRCA1,BRCA2,CDKN2A,CEBPA,CHD4,CREBBP,CTNNB1,E2F1,EGR1,EP300,GATA3,HOXB7,HRAS,IRF2,IRF3,JAK1,KLF5,KMT2A,MAPK1,MAX,MDFIC,MEN1,MSX2,MYB,MYBL1,NCOR1,NFE2L2,NOTCH1,NOTCH2,NRIP1,PGR,PIK3CA,PIK3R1,RAC1,RUNX1,RUNX2,SMAD2,SMAD4,SMARCA2,SMARCA4,STAT2,STK11,TAF4,TBL1XR1,TFDP1,TGIF1,TP53,TP53BP1,TP63,VHL,WT1	56
Cellular Development, Cellular Growth and Proliferation	proliferation of blood cells	4.72e-15	ABCB1,APC,ATM,B2M,BCL2L11,BRAF,BRCA1,CASP8,CBFB,CD58,CDH1,CDKN1A,CDKN1B,CDKN2A,CEBPA,CLEC4M,CSF3R,CTCF,CTNNB1,CYLD,E2F1,EGFR,EGR1,EP300,EPHA2,FLT3,FUBP1,GATA3,GNAI2,HOXB7,HPGDS,HRAS,IFNGR1,IL1RL1,INPP4A,IRF2,JAK1,JAK2,JMJD1C,KIT,KLF3,KMT2A,KRAS,LAMTOR2,MAP2K4,MAP3K1,MARK2,MTOR,MYB,MYBL1,MYH9,NF1,NOTCH1,NRAS,PCGF2,PIK3CA,PIK3R1,PPM1D,PTEN,RUNX1,RUNX1T1,SF3B1,SMAD4,SMARCA4,SOS2,SP3,STK11,TCF12,TGFB…	75
Cellular Development, Cellular Growth and Proliferation	proliferation of blood cells	4.72e-15	ABCB1,APC,ATM,B2M,BCL2L11,BRAF,BRCA1,CASP8,CBFB,CD58,CDH1,CDKN1A,CDKN1B,CDKN2A,CEBPA,CLEC4M,CSF3R,CTCF,CTNNB1,CYLD,E2F1,EGFR,EGR1,EP300,EPHA2,FLT3,FUBP1,GATA3,GNAI2,HOXB7,HPGDS,HRAS,IFNGR1,IL1RL1,INPP4A,IRF2,JAK1,JAK2,JMJD1C,KIT,KLF3,KMT2A,KRAS,LAMTOR2,MAP2K4,MAP3K1,MARK2,MTOR,MYB,MYBL1,MYH9,NF1,NOTCH1,NRAS,PCGF2,PIK3CA,PIK3R1,PPM1D,PTEN,RUNX1,RUNX1T1,SF3B1,SMAD4,SMARCA4,SOS2,SP3,STK11,TCF12,TGFB…	75
Cell Death and Survival	necrosis	4.89e-15	ABCB1,ABL2,ACVR1B,AGTR1,AMER1,APC,ARID1A,ATAD2,ATM,ATRX,B2M,BAP1,BCL2L11,BMF,BRAF,BRCA1,BRCA2,CASP8,CBFB,CCAR1,CDH1,CDKN1A,CDKN1B,CDKN2A,CEBPA,CEL,CHEK2,CLOCK,COL25A1,COL4A3,CPEB2,CREBBP,CSF3R,CTCF,CTNNB1,CUL3,CX3CL1,CYLD,DDX17,DDX3X,DNMT3A,E2F1,EEF1A1,EGFR,EGR1,EP300,EPHA2,FBXW7,FGF6,FGFR2,FLT3,FOXA2,FOXP1,FUBP1,GATA3,GNAI2,GNAS,GPS2,GRM1,HAX1,HLA-B,HMGB2,HOXB9,HRAS,IDH2,IFNGR1,IL1RL1,INPP4A,INP…	158
Cell Death and Survival	cell death	7.63e-15	ABCB1,ABL2,ACVR1B,AGTR1,AMER1,AMOT,APC,ARHGAP35,ARID1A,ASPA,ATAD2,ATM,ATRX,B2M,BAP1,BCL2L11,BMF,BRAF,BRCA1,BRCA2,CASP8,CBFB,CCAR1,CD58,CDH1,CDKN1A,CDKN1B,CDKN2A,CEBPA,CEL,CHD8,CHEK2,CLOCK,COL25A1,COL4A3,CPEB2,CREBBP,CSF3R,CTCF,CTNNB1,CUL3,CX3CL1,CYLD,DACH1,DDX17,DDX3X,DMC1,DNMT3A,DYNAP,DYRK1A,E2F1,EEF1A1,EGFR,EGR1,EP300,EPHA2,FBXW7,FGF6,FGFR2,FLT3,FOXA2,FOXP1,FUBP1,GATA3,GNAI2,GNAS,GPS2,GRM1,HAX1…	186
Cellular Growth and Proliferation	expansion of cells	9.03e-15	ABCB1,ATM,B2M,BRCA1,CASP8,CDH1,CDKN1A,CDKN1B,CEBPA,CTNNB1,CUL3,EGFR,EGR1,FLT3,HRAS,IFNGR1,IRF2,JAK2,KIT,KMT2A,KRAS,MEN1,MYB,MYBL1,NOTCH1,NRAS,PCGF2,PIK3CA,PTEN,RAC1,RB1,RUNX1,RUNX1T1,RUNX2,SMAD4,STK11,TCF12,TGFBR2,TP53,VHL	40
Cellular Development	epithelial-mesenchymal transition	1.68e-14	B2M,BRAF,BRCA1,CDH1,CDKN1B,CTNNB1,DDX17,EGFR,ESRP1,FGFR2,FOXA1,FOXA2,GATA3,HRAS,IDH1,IDH2,IRF3,KRAS,MMP2,MSX2,NOTCH1,NOTCH2,PIK3CA,PTEN,PTPN14,RAC1,RB1,SMAD4,SOX9,STK11,TGFBR2,TP53,TP63,WT1	34
Cell Cycle	G1 phase of tumor cell lines	2.28e-14	APC,ATM,BAP1,BRAF,BRCA1,CDKN1A,CDKN1B,CDKN2A,CEBPA,CEL,DARS,E2F1,EGFR,EP300,FLT3,GPS2,HRAS,JAK2,KIT,MLH1,MTOR,NFE2L2,NOTCH1,NOTCH2,POU4F1,PTEN,RB1,RB1CC1,RPL5,STK11,TP53,TP63,VHL,WT1	34
Cellular Development, Cellular Growth and Proliferation, Hematological System Development and Function, Hematopoiesis, Tissue Development	differentiation of hematopoietic cells	2.32e-14	APC,BRAF,CASP8,CBFB,CDKN1A,CDKN1B,CDKN2A,CEBPA,CSF3R,CTCF,CTNNB1,E2F1,EGFR,EGR1,FLT3,GATA3,HMGB2,HRAS,JAK1,JAK2,KIT,KMT2A,KRAS,MAPK1,MAX,MKL1,MYB,NOTCH1,NRAS,PTEN,RAC1,RB1,RUNX1,RUNX1T1,RUNX2,SIN3A,SP3,SRSF4,STK11,TET2,TP53,U2AF1/U2AF1L5,WT1	43
Cellular Development, Cellular Growth and Proliferation, Hematological System Development and Function, Hematopoiesis, Tissue Development	differentiation of hematopoietic cells	2.32e-14	APC,BRAF,CASP8,CBFB,CDKN1A,CDKN1B,CDKN2A,CEBPA,CSF3R,CTCF,CTNNB1,E2F1,EGFR,EGR1,FLT3,GATA3,HMGB2,HRAS,JAK1,JAK2,KIT,KMT2A,KRAS,MAPK1,MAX,MKL1,MYB,NOTCH1,NRAS,PTEN,RAC1,RB1,RUNX1,RUNX1T1,RUNX2,SIN3A,SP3,SRSF4,STK11,TET2,TP53,U2AF1/U2AF1L5,WT1	43
Cell-mediated Immune Response, Cellular Development, Cellular Function and Maintenance, Cellular Growth and Proliferation, Embryonic Development, Hematological System Development and Function, Hematopoiesis, Lymphoid Tissue Structure and Development, Organ Development, Organismal Development, Tissue Development	differentiation of T lymphocytes	2.54e-14	ABL2,APC,ATM,B2M,BCL2L11,BRAF,CBFB,CDKN1B,CDKN2A,CEBPA,CTNNB1,CYLD,E2F1,EGR1,GATA3,HRAS,IFNGR1,IL1RL1,IRF2,IRF3,JAK1,KIT,MAPK1,MEN1,MTOR,MYB,NCOR1,NOTCH1,NOTCH2,PCGF2,PIK3R1,RAC1,RPL22,RUNX1,RUNX2,SMAD2,SMARCA4,SP3,STAT2,STK11,TCF12,TGFBR2,TP53,TSC1,ZFP36L1	45
Cell-mediated Immune Response, Cellular Development, Cellular Function and Maintenance, Cellular Growth and Proliferation, Embryonic Development, Hematological System Development and Function, Hematopoiesis, Lymphoid Tissue Structure and Development, Organ Development, Organismal Development, Tissue Development	differentiation of T lymphocytes	2.54e-14	ABL2,APC,ATM,B2M,BCL2L11,BRAF,CBFB,CDKN1B,CDKN2A,CEBPA,CTNNB1,CYLD,E2F1,EGR1,GATA3,HRAS,IFNGR1,IL1RL1,IRF2,IRF3,JAK1,KIT,MAPK1,MEN1,MTOR,MYB,NCOR1,NOTCH1,NOTCH2,PCGF2,PIK3R1,RAC1,RPL22,RUNX1,RUNX2,SMAD2,SMARCA4,SP3,STAT2,STK11,TCF12,TGFBR2,TP53,TSC1,ZFP36L1	45
Cellular Development, Cellular Growth and Proliferation	cell proliferation of breast cancer cell lines	3.03e-14	AMOT,ATAD2,ATM,BRCA1,BRCA2,CASP8,CDH1,CDKN1A,CDKN1B,CDKN2A,CEBPA,CTCF,CX3CL1,E2F1,EEF1A1,EGFR,EP300,EPHA2,FBXW7,FGFR2,FOXP1,GNAS,GPS2,HOXB7,HRAS,JAK2,KLF5,KMT2D,KRAS,LATS1,MAPK1,MTOR,MYB,NCOR1,PGR,PIK3CA,PIK3R1,PPP2R1A,PPP2R2B,PTEN,RAC1,RB1,RB1CC1,RGS16,TGFBR2,TP53,TP63,UBE2J2,VHL,WT1,ZNF668	51
Cellular Development, Cellular Growth and Proliferation	cell proliferation of breast cancer cell lines	3.03e-14	AMOT,ATAD2,ATM,BRCA1,BRCA2,CASP8,CDH1,CDKN1A,CDKN1B,CDKN2A,CEBPA,CTCF,CX3CL1,E2F1,EEF1A1,EGFR,EP300,EPHA2,FBXW7,FGFR2,FOXP1,GNAS,GPS2,HOXB7,HRAS,JAK2,KLF5,KMT2D,KRAS,LATS1,MAPK1,MTOR,MYB,NCOR1,PGR,PIK3CA,PIK3R1,PPP2R1A,PPP2R2B,PTEN,RAC1,RB1,RB1CC1,RGS16,TGFBR2,TP53,TP63,UBE2J2,VHL,WT1,ZNF668	51
Cell Death and Survival	cell death of connective tissue cells	3.62e-14	ABCB1,ABL2,ARID1A,ATM,ATRX,BCL2L11,BMF,BRCA1,BRCA2,CASP8,CDH1,CDKN1A,CDKN1B,CDKN2A,CTNNB1,CUL3,CYLD,DDX3X,E2F1,EEF1A1,EGFR,EGR1,EP300,FGFR2,HRAS,IRF3,KRAS,MAP2K4,MAP3K1,MAPK1,MAPT,MEN1,MKL1,MLH1,MTOR,NFE2L2,NOTCH1,NRAS,PIK3CA,PIK3R1,PPM1D,PTEN,RAC1,RB1,RB1CC1,REV3L,RHEB,RUNX1,RUNX1T1,RUNX2,SMAD2,TAF4,TFDP1,TP53,TP63,TSC1,TSC2,VHL	58
Cell Death and Survival, Organismal Injury and Abnormalities	necrosis of epithelial tissue	3.62e-14	ABL2,AMER1,APC,ATM,ATRX,BCL2L11,BMF,BRAF,CASP8,CDH1,CDKN1A,CDKN1B,CDKN2A,CEBPA,COL4A3,CTNNB1,CYLD,DDX17,E2F1,EEF1A1,EGFR,EGR1,EPHA2,GRM1,HAX1,HRAS,IFNGR1,IRF3,JAK2,KLF5,KRAS,MAP2K4,MAP3K1,MAPK1,MAPT,MAX,MKL1,MMP2,MSX2,MTOR,MYB,NF2,NFE2L2,NRAS,PIK3R1,PSIP1,PTEN,RAC1,RAD21,RB1,RB1CC1,RUNX2,SMAD2,STK11,TCF12,TGFBR2,TP53,TP63	58
Cell Death and Survival	cell death of immune cells	4.14e-14	ATM,BCL2L11,BMF,BRCA1,CASP8,CBFB,CCAR1,CDKN1A,CDKN1B,CDKN2A,CEBPA,CHEK2,CLOCK,CTNNB1,CX3CL1,CYLD,E2F1,EGFR,EGR1,EP300,FBXW7,FLT3,FOXP1,GATA3,GNAS,HRAS,IFNGR1,IL1RL1,IRF2,IRF3,JAK1,JAK2,KIT,KRAS,LAMTOR2,LGALS2,MAP2K4,MTOR,MYB,NF1,NFE2L2,NOTCH1,NRAS,PIK3CA,PIK3R1,PPM1D,PPP2R2B,PTEN,RAC1,RASA1,RB1,RUNX1,SMAD4,SMARCA4,STK11,TFDP1,TGFBR2,TP53,TSC1,USP9X,VHL	61
Cell Death and Survival, Organismal Injury and Abnormalities	cell death of epithelial cells	4.17e-14	AMER1,APC,ATM,ATRX,BCL2L11,BMF,BRAF,CASP8,CDH1,CDKN1A,CDKN1B,CDKN2A,CEBPA,CTNNB1,CYLD,DDX17,E2F1,EEF1A1,EGFR,EGR1,EPHA2,GRM1,HAX1,HRAS,IFNGR1,IRF3,JAK2,KRAS,MAP2K4,MAP3K1,MAPK1,MAPT,MKL1,MMP2,MSX2,MTOR,MYB,NF2,NFE2L2,NRAS,PIK3R1,PSIP1,PTEN,RAC1,RAD21,RB1,RB1CC1,SMAD2,TCF12,TGFBR2,TP53,TP63	52
Cellular Development, Cellular Growth and Proliferation, Hematological System Development and Function, Hematopoiesis, Tissue Development	differentiation of hematopoietic progenitor cells	4.51e-14	APC,BRAF,CASP8,CBFB,CDKN1A,CDKN1B,CDKN2A,CEBPA,CSF3R,CTCF,CTNNB1,E2F1,EGFR,EGR1,FLT3,GATA3,HMGB2,HRAS,JAK2,KIT,KMT2A,KRAS,MAPK1,MAX,MKL1,MYB,NOTCH1,NRAS,PTEN,RAC1,RB1,RUNX1,RUNX1T1,RUNX2,SIN3A,SP3,SRSF4,STK11,TET2,TP53,U2AF1/U2AF1L5,WT1	42
Cellular Development, Cellular Growth and Proliferation, Hematological System Development and Function, Hematopoiesis, Tissue Development	differentiation of hematopoietic progenitor cells	4.51e-14	APC,BRAF,CASP8,CBFB,CDKN1A,CDKN1B,CDKN2A,CEBPA,CSF3R,CTCF,CTNNB1,E2F1,EGFR,EGR1,FLT3,GATA3,HMGB2,HRAS,JAK2,KIT,KMT2A,KRAS,MAPK1,MAX,MKL1,MYB,NOTCH1,NRAS,PTEN,RAC1,RB1,RUNX1,RUNX1T1,RUNX2,SIN3A,SP3,SRSF4,STK11,TET2,TP53,U2AF1/U2AF1L5,WT1	42
Cell Cycle	arrest in G1 phase of tumor cell lines	4.89e-14	BRAF,BRCA1,CDKN1A,CDKN1B,CDKN2A,CEBPA,CEL,E2F1,EGFR,EP300,FLT3,GPS2,HRAS,JAK2,MLH1,MTOR,NFE2L2,NOTCH1,NOTCH2,POU4F1,PTEN,RB1,RB1CC1,RPL5,STK11,TP53,TP63,VHL,WT1	29
Cellular Development, Cellular Growth and Proliferation, Connective Tissue Development and Function, Tissue Development	cell proliferation of fibroblasts	5.23e-14	ATM,BRCA1,BRCA2,CDH1,CDKN1A,CDKN1B,CDKN2A,CTNNB1,DACH1,E2F1,EGFR,EP300,HRAS,HS6ST1,IDH2,KMT2A,KMT2C,KRAS,LATS1,MAP3K1,MAPK1,MEN1,MLH1,MMP2,NF1,NF2,NRAS,PCGF2,PIK3CA,PPM1D,PTEN,RAC1,RASA1,RB1,RHEB,SIN3A,TAF4,TGFBR2,TGIF1,TP53,TSC2,VHL	42
Cellular Development, Cellular Growth and Proliferation, Connective Tissue Development and Function, Tissue Development	cell proliferation of fibroblasts	5.23e-14	ATM,BRCA1,BRCA2,CDH1,CDKN1A,CDKN1B,CDKN2A,CTNNB1,DACH1,E2F1,EGFR,EP300,HRAS,HS6ST1,IDH2,KMT2A,KMT2C,KRAS,LATS1,MAP3K1,MAPK1,MEN1,MLH1,MMP2,NF1,NF2,NRAS,PCGF2,PIK3CA,PPM1D,PTEN,RAC1,RASA1,RB1,RHEB,SIN3A,TAF4,TGFBR2,TGIF1,TP53,TSC2,VHL	42
Cancer, Cell Death and Survival, Organismal Injury and Abnormalities, Tumor Morphology	apoptosis of tumor cells	5.79e-14	APC,ATM,B2M,BCL2L11,BRAF,BRCA1,CASP8,CDH1,CDKN1A,CDKN1B,CDKN2A,E2F1,EGFR,EP300,HRAS,JAK2,KEAP1,KIT,KRAS,MAP3K1,MAPK1,MTOR,MYB,NFE2L2,NOTCH1,NRAS,PIK3R1,PTEN,RAC1,RB1,RUNX1,SMARCA4,STK11,TGFBR2,TP53,TSC22D1,VHL	37
Cellular Development, Cellular Growth and Proliferation	arrest in proliferation of tumor cell lines	6.81e-14	APC,CDKN1A,CDKN1B,CDKN2A,CEBPA,E2F1,EGFR,FGFR2,FOXA2,MAPK1,MYB,MYBL1,NOTCH1,NOTCH2,POU4F1,PTEN,RB1,RUNX1,SMAD4,SMARCA4,TGFBR2,TP53,TP63,VHL	24
Cellular Development, Cellular Growth and Proliferation	arrest in proliferation of tumor cell lines	6.81e-14	APC,CDKN1A,CDKN1B,CDKN2A,CEBPA,E2F1,EGFR,FGFR2,FOXA2,MAPK1,MYB,MYBL1,NOTCH1,NOTCH2,POU4F1,PTEN,RB1,RUNX1,SMAD4,SMARCA4,TGFBR2,TP53,TP63,VHL	24
Cell Death and Survival	apoptosis of blood cells	9.26e-14	APC,ATM,BCL2L11,BMF,BRCA1,CASP8,CCAR1,CDKN1A,CDKN1B,CDKN2A,CHEK2,CREBBP,CTNNB1,CX3CL1,CYLD,E2F1,EGR1,EP300,FBXW7,FLT3,FOXP1,GNAS,HAX1,IFNGR1,IL1RL1,IRF2,IRF3,JAK2,KMT2A,KRAS,LAMTOR2,LGALS2,MAP2K4,MTOR,MYB,NFE2L2,NOTCH1,PIK3R1,PPM1D,PPP2R2B,PTEN,RAC1,RB1,RUNX1,SF3B1,SMAD4,SOX17,TP53,TSC1,VHL,WT1	51
Cell Cycle	G2 phase	1.74e-13	ABCB1,ATM,ATRX,BRCA1,CDKN1A,CDKN2A,CEBPA,CHEK2,CTNNB1,DCX,E2F1,EGFR,EGR1,EP300,FLT3,HRAS,IDH1,KRAS,LATS1,MEN1,MLH1,MYB,PPM1D,PPP2R2A,PTEN,RAC1,RB1,RBBP6,RUNX2,SMARCA1,SMARCA4,TGFBR2,TP53,TP53BP1,UBQLN2,WT1	36
Cell Cycle, Connective Tissue Development and Function	G1 phase of fibroblasts	3.06e-13	CDKN1A,CDKN1B,CDKN2A,CHEK2,DYRK1A,E2F1,HRAS,MAPK1,RAC1,RB1,SMARCA2,TFDP1,TP53	13
Cell Death and Survival	cell death of fibroblast cell lines	3.13e-13	ABCB1,ABL2,ARID1A,ATM,BCL2L11,BMF,BRCA1,BRCA2,CASP8,CDKN1A,CDKN1B,CDKN2A,CTNNB1,CYLD,DDX3X,E2F1,EEF1A1,EGFR,EGR1,FGFR2,HRAS,KRAS,MAP2K4,MAP3K1,MAPK1,MAPT,MEN1,MKL1,MTOR,NFE2L2,NRAS,PIK3CA,PIK3R1,PPM1D,PTEN,RAC1,RB1,RHEB,RUNX1,RUNX1T1,SMAD2,TFDP1,TP53,TP63,TSC1,TSC2	46
Cell Death and Survival	cell death of tumor cell lines	3.16e-13	ABCB1,ABL2,ACVR1B,AMER1,APC,ATAD2,ATM,B2M,BAP1,BCL2L11,BMF,BRAF,BRCA1,BRCA2,CASP8,CCAR1,CDH1,CDKN1A,CDKN1B,CDKN2A,CEBPA,CEL,CHEK2,CPEB2,CREBBP,CTCF,CTNNB1,CYLD,DDX3X,DNMT3A,E2F1,EEF1A1,EGFR,EGR1,EP300,EPHA2,FGF6,FGFR2,FLT3,FOXA2,FUBP1,GNAS,GPS2,HAX1,HOXB9,HRAS,IL1RL1,IRF2,IRF3,JAK1,JAK2,KEAP1,KIAA1468,KIT,KLF5,KMT2A,KRAS,LATS1,MAP2K4,MAP3K1,MAPK1,MAPT,MAX,MEN1,MLH1,MTOR,MYB,MYBL1,NF1,NFE2L2,NOTCH…	106
Cell Death and Survival, Cellular Function and Maintenance	self-renewal of cells	3.37e-13	ABCB1,APC,ARID1A,CDKN1A,CDKN2A,CTNNB1,EGFR,FGFR2,FLT3,IFNGR1,JAK2,KIT,KMT2A,MYB,NFE2L2,NOTCH1,PCGF2,PIK3R1,PPM1D,PTEN,SMARCA4,TBX3,TP53,TP63	24
Cellular Growth and Proliferation	cytostasis	3.41e-13	BAP1,BRCA1,CDH1,CDKN1A,CDKN1B,CDKN2A,CHEK2,CTNNB1,EGFR,EGR1,FLT3,HRAS,IRF2,JAK2,KIT,KRAS,LATS1,MAP2K4,NF2,NOTCH1,NRAS,PTEN,RAC1,RB1,RB1CC1,SMAD2,SMAD4,SMARCA1,SMARCA2,SMARCA4,STK11,TGFBR2,TP53,TP63,TSC2,WT1	36
Cancer, Cellular Development, Cellular Growth and Proliferation, Organismal Injury and Abnormalities, Tumor Morphology	proliferation of tumor cells	5.13e-13	APC,ATM,BRAF,BRCA1,CDH1,CDKN1A,CDKN1B,CDKN2A,COL4A3,CSF3R,CTNNB1,EEF1A1,EGFR,EGR1,EPHA2,HOXB9,HRAS,IRF3,JAK2,KIT,KMT2A,KRAS,MAPK1,MEN1,MTOR,MYB,NF1,NF2,NOTCH1,NRAS,NTS,PIK3CA,PPM1D,PTEN,RAC1,RB1,RB1CC1,RHEB,RUNX2,STK11,TET2,TGFBR2,TLE1,TP53,TP63,TSC2,TUSC3,WT1	48
Cancer, Cellular Development, Cellular Growth and Proliferation, Organismal Injury and Abnormalities, Tumor Morphology	proliferation of tumor cells	5.13e-13	APC,ATM,BRAF,BRCA1,CDH1,CDKN1A,CDKN1B,CDKN2A,COL4A3,CSF3R,CTNNB1,EEF1A1,EGFR,EGR1,EPHA2,HOXB9,HRAS,IRF3,JAK2,KIT,KMT2A,KRAS,MAPK1,MEN1,MTOR,MYB,NF1,NF2,NOTCH1,NRAS,NTS,PIK3CA,PPM1D,PTEN,RAC1,RB1,RB1CC1,RHEB,RUNX2,STK11,TET2,TGFBR2,TLE1,TP53,TP63,TSC2,TUSC3,WT1	48
Cell Death and Survival	apoptosis of fibroblasts	7.61e-13	ABL2,ATM,BCL2L11,CASP8,CDH1,CDKN1A,CDKN1B,CDKN2A,CTNNB1,CUL3,E2F1,EGFR,EP300,HRAS,IRF3,KRAS,MAP2K4,MAP3K1,MEN1,NFE2L2,NOTCH1,NRAS,PIK3CA,PTEN,RAC1,RB1,RB1CC1,TAF4,TFDP1,TP53,TSC2	31
Cell Cycle, Cellular Development	senescence of epithelial cells	1.11e-12	BRAF,CDKN1A,CDKN2A,HRAS,KRAS,NFE2L2,NRAS,PTEN,TGFBR2,TP53,TP63,TSC22D1	12
Cell Cycle, Cellular Development	senescence of epithelial cells	1.11e-12	BRAF,CDKN1A,CDKN2A,HRAS,KRAS,NFE2L2,NRAS,PTEN,TGFBR2,TP53,TP63,TSC22D1	12
Cell Death and Survival	cell death of fibroblasts	1.25e-12	ABL2,ATM,BCL2L11,BRCA1,CASP8,CDH1,CDKN1A,CDKN1B,CDKN2A,CTNNB1,CUL3,E2F1,EGFR,EP300,HRAS,IRF3,KRAS,MAP2K4,MAP3K1,MEN1,MLH1,NFE2L2,NOTCH1,NRAS,PIK3CA,PTEN,RAC1,RB1,RB1CC1,REV3L,TAF4,TFDP1,TP53,TSC2	34
Cell Death and Survival	apoptosis of connective tissue cells	1.46e-12	ABL2,ATM,ATRX,BCL2L11,CASP8,CDH1,CDKN1A,CDKN1B,CDKN2A,CTNNB1,CUL3,E2F1,EGFR,EP300,FGFR2,HRAS,IRF3,KRAS,MAP2K4,MAP3K1,MAPK1,MEN1,NFE2L2,NOTCH1,NRAS,PIK3CA,PTEN,RAC1,RB1,RB1CC1,RUNX2,SMAD2,TAF4,TFDP1,TP53,TSC2	36
Cell Cycle	interphase of connective tissue cells	1.74e-12	ATM,ATRX,CDKN1A,CDKN1B,CDKN2A,CHEK2,CUL3,DYRK1A,E2F1,HRAS,KRAS,MAPK1,RAC1,RB1,SMARCA2,SMARCA4,TFDP1,TP53	18
Cancer, Cell Death and Survival, Organismal Injury and Abnormalities, Tumor Morphology	necrosis of tumor	1.77e-12	APC,ATM,B2M,BCL2L11,BRAF,BRCA1,CASP8,CDH1,CDKN1A,CDKN1B,CDKN2A,CSF3R,E2F1,EEF1A1,EGFR,EP300,FLT3,HRAS,IDH2,JAK2,KEAP1,KIT,KRAS,MAP3K1,MAPK1,MTOR,MYB,NFE2L2,NOTCH1,NRAS,PIK3R1,PSMC6,PTEN,RAC1,RB1,REG1A,RPL5,RUNX1,SF3B1,SMARCA4,STK11,TGFBR2,TP53,TSC22D1,TTK,VHL,WT1	47
Cancer, Cell Death and Survival, Organismal Injury and Abnormalities, Tumor Morphology	necrosis of malignant tumor	2.05e-12	ATM,B2M,BCL2L11,BRAF,BRCA1,CASP8,CDH1,CDKN1A,CDKN1B,CDKN2A,CSF3R,EEF1A1,EGFR,FLT3,IDH2,JAK2,KEAP1,KIT,KRAS,MAP3K1,MAPK1,MTOR,MYB,NFE2L2,NOTCH1,NRAS,PIK3R1,PSMC6,PTEN,RAC1,RB1,REG1A,RPL5,RUNX1,SF3B1,SMARCA4,STK11,TP53,TSC22D1,TTK,VHL,WT1	42
Cancer, Cell Death and Survival, Organismal Injury and Abnormalities, Tumor Morphology	apoptosis of cancer cells	2.49e-12	ATM,B2M,BCL2L11,BRAF,BRCA1,CASP8,CDH1,CDKN1A,CDKN1B,EGFR,JAK2,KEAP1,KIT,KRAS,MAP3K1,MAPK1,MTOR,MYB,NFE2L2,NOTCH1,NRAS,PTEN,RAC1,RB1,RUNX1,SMARCA4,STK11,TP53,TSC22D1,VHL	30
Cancer, Cell Death and Survival, Organismal Injury and Abnormalities, Tumor Morphology	cell death of tumor cells	3.14e-12	APC,ATM,B2M,BCL2L11,BRAF,BRCA1,CASP8,CDH1,CDKN1A,CDKN1B,CDKN2A,E2F1,EEF1A1,EGFR,EP300,FLT3,HRAS,IDH2,JAK2,KEAP1,KIT,KRAS,MAP3K1,MAPK1,MTOR,MYB,NFE2L2,NOTCH1,NRAS,PIK3R1,PSMC6,PTEN,RAC1,RB1,REG1A,RPL5,RUNX1,SF3B1,SMARCA4,STK11,TGFBR2,TP53,TSC22D1,TTK,VHL,WT1	46
Cell Cycle	G1/S phase transition	3.33e-12	ACVR1B,BAP1,CDKN1A,CDKN1B,CDKN2A,CEBPA,CEL,CHEK2,CTNNB1,CUL3,CYLD,DARS,E2F1,EP300,HRAS,KIT,KMT2A,KRAS,MTOR,MYB,PPP6C,PTEN,RAC1,RB1,RB1CC1,RPL5,RUNX1,STK11,TFDP1,TP53	30
Cell Cycle	interphase of fibroblasts	3.52e-12	ATM,CDKN1A,CDKN1B,CDKN2A,CHEK2,CUL3,DYRK1A,E2F1,HRAS,KRAS,MAPK1,RAC1,RB1,SMARCA2,SMARCA4,TFDP1,TP53	17
Cell Cycle	interphase of lung cancer cell lines	4.48e-12	ATM,BAP1,BRAF,BRCA1,CDKN1A,CDKN1B,CDKN2A,CHEK2,EGFR,EP300,KRAS,NOTCH1,NOTCH2,RB1,STK11,TP53,TP63	17
Cell Cycle	ploidy	4.61e-12	APC,ATM,BRAF,BRCA1,CDKN1A,CDKN2A,CUL3,E2F1,EGFR,EP300,FBXW7,HRAS,IRF2,JAK1,KRAS,MAPT,MKL1,MYB,PPM1D,PTEN,RB1,TGFBR2,TP53,TP53BP1,TP63,VHL	26
Cell Cycle	G2/M phase	4.86e-12	ABCB1,ATM,ATRX,BRCA1,CDKN1A,CDKN2A,CEBPA,CHEK2,CTNNB1,EGFR,EP300,FLT3,HRAS,KRAS,LATS1,MEN1,MLH1,MYB,PPM1D,PTEN,RAC1,RB1,RBBP6,RUNX2,SMARCA1,SMARCA4,TGFBR2,TP53,TP53BP1,UBQLN2	30
Cellular Growth and Proliferation	colony formation of tumor cell lines	5.68e-12	BCL2L11,BRAF,BRCA1,CDKN1A,CDKN1B,CDKN2A,CTCF,CTNNB1,DDX3X,E2F1,EGFR,EGR1,EPHA2,FGFR2,FOXA2,HOXB7,IRF3,JAK2,KIT,KRAS,MAP3K1,MSX2,MYB,NF1,NOTCH1,PCGF2,PGR,PIK3CA,PIK3R1,PTEN,RB1,RUNX2,TBX3,TP53,TP63,TSC2	36
Cancer, Cell Death and Survival, Organismal Injury and Abnormalities, Tumor Morphology	cell death of cancer cells	7.09e-12	ATM,B2M,BCL2L11,BRAF,BRCA1,CASP8,CDH1,CDKN1A,CDKN1B,CDKN2A,EEF1A1,EGFR,FLT3,IDH2,JAK2,KEAP1,KIT,KRAS,MAP3K1,MAPK1,MTOR,MYB,NFE2L2,NOTCH1,NRAS,PIK3R1,PSMC6,PTEN,RAC1,RB1,REG1A,RPL5,RUNX1,SF3B1,SMARCA4,STK11,TP53,TSC22D1,TTK,VHL,WT1	41
Cellular Development, Connective Tissue Development and Function, Tissue Development	differentiation of connective tissue cells	9.45e-12	ACVR2A,APC,ASXL1,ASXL2,ATM,CASP8,CBFB,CCAR1,CDKN1A,CEBPA,CLEC4M,CNOT3,CTNNB1,E2F1,EGFR,EP300,EPHA2,FBXW7,FFAR2,FGFR2,FOXA2,FOXP1,GATA3,GNAS,GTPBP4,IL1RL1,KLF5,MAPK1,MEN1,MEX3C,MKL1,MSX2,MTOR,NF1,NFE2L2,NIPBL,NOTCH1,NOTCH2,PIK3R1,PLCL1,POU4F1,PTEN,RB1,RUNX1,RUNX1T1,RUNX2,SMAD2,SMAD4,SMARCA2,SMARCA4,SOX9,STK11,TBL1XR1,TGFBR2,TP53,TP63,ZFP36L1	57
Cellular Development, Cellular Growth and Proliferation	cell proliferation of carcinoma cell lines	1.06e-11	AJUBA,APC,ARID1A,BRAF,CDH1,CDKN1A,CDKN1B,CDKN2A,CEBPA,DDX3X,E2F1,EGFR,EGR1,EP300,EPHA2,FGFR2,HOXB9,HRAS,IDH2,KEAP1,KRAS,MAPK1,MTOR,NFE2L2,NOTCH1,NOTCH2,PIK3CA,PIK3R1,PTEN,RAC1,RB1,RUNX2,SMAD4,SMARCA4,SOX9,SPZ1,STK11,TGFBR2,TP53,TP63,TSC1,VHL,WT1	43
Cellular Development, Cellular Growth and Proliferation	cell proliferation of carcinoma cell lines	1.06e-11	AJUBA,APC,ARID1A,BRAF,CDH1,CDKN1A,CDKN1B,CDKN2A,CEBPA,DDX3X,E2F1,EGFR,EGR1,EP300,EPHA2,FGFR2,HOXB9,HRAS,IDH2,KEAP1,KRAS,MAPK1,MTOR,NFE2L2,NOTCH1,NOTCH2,PIK3CA,PIK3R1,PTEN,RAC1,RB1,RUNX2,SMAD4,SMARCA4,SOX9,SPZ1,STK11,TGFBR2,TP53,TP63,TSC1,VHL,WT1	43
Cell Cycle	ploidy of cells	1.11e-11	APC,ATM,BRAF,BRCA1,CDKN1A,CDKN2A,CUL3,E2F1,EGFR,EP300,FBXW7,HRAS,IRF2,JAK1,MKL1,MYB,PTEN,RB1,TGFBR2,TP53,TP53BP1,TP63,VHL	23
Cellular Development, Cellular Growth and Proliferation, Hematological System Development and Function, Hematopoiesis, Lymphoid Tissue Structure and Development, Tissue Development	granulopoiesis	1.11e-11	CBFB,CDKN1B,CEBPA,CSF3R,EGR1,FLT3,HAX1,HRAS,KMT2A,KRAS,MAPK1,MYB,MYBL1,NOTCH1,NOTCH2,PPM1D,RBP1,RGL2,RUNX1,RUNX1T1,SP3,TET2,TP53	23
Cellular Development, Cellular Growth and Proliferation, Hematological System Development and Function, Hematopoiesis, Lymphoid Tissue Structure and Development, Tissue Development	granulopoiesis	1.11e-11	CBFB,CDKN1B,CEBPA,CSF3R,EGR1,FLT3,HAX1,HRAS,KMT2A,KRAS,MAPK1,MYB,MYBL1,NOTCH1,NOTCH2,PPM1D,RBP1,RGL2,RUNX1,RUNX1T1,SP3,TET2,TP53	23
Cell Death and Survival	apoptosis of fibroblast cell lines	1.12e-11	ABCB1,ABL2,ATM,BCL2L11,BRCA1,CASP8,CDKN1A,CDKN1B,CDKN2A,CTNNB1,CYLD,DDX3X,E2F1,EEF1A1,EGFR,EGR1,FGFR2,HRAS,KRAS,MAP2K4,MAP3K1,MEN1,MTOR,NFE2L2,NRAS,PIK3CA,PIK3R1,PPM1D,PTEN,RAC1,RB1,RHEB,RUNX1,TP53,TP63,TSC1,TSC2	37
Cellular Development, Connective Tissue Development and Function	differentiation of fibroblast cell lines	1.26e-11	ARID2,CCAR1,CDKN1A,CDKN2A,CEBPA,CTNNB1,DYRK1A,FBXW7,GNAS,IDH2,JAK2,KEAP1,MAPK1,MEN1,MSX2,MTOR,NFE2L2,NOTCH1,NRAS,PGR,RB1,RBP1,RUNX2,SMARCA2,SMARCA4,THRAP3	26
Cell Death and Survival, Organismal Injury and Abnormalities	apoptosis of epithelial cell lines	1.45e-11	APC,BCL2L11,BRAF,CASP8,CDH1,CDKN2A,CTNNB1,DDX17,EEF1A1,EGFR,GRM1,HAX1,HRAS,JAK2,KRAS,MAP2K4,MAP3K1,MAPK1,MAPT,NF2,NFE2L2,NRAS,PSIP1,RAC1,RAD21,RB1,TCF12,TGFBR2,TP53,TP63	30
Cell Cycle	arrest in cell cycle progression of lung cancer cell lines	2.03e-11	AMER1,CDKN1A,CDKN2A,EGFR,RB1,SMARCA2,SMARCA4,STK11,TP53,TP63	10
Cell Death and Survival	apoptosis of T lymphocytes	2.1e-11	ATM,BCL2L11,BMF,BRCA1,CASP8,CCAR1,CDKN1A,CDKN1B,CDKN2A,CHEK2,CTNNB1,CYLD,E2F1,EGR1,EP300,FBXW7,GNAS,IFNGR1,KRAS,LGALS2,MAP2K4,NFE2L2,NOTCH1,PIK3R1,PPM1D,PPP2R2B,PTEN,RAC1,RB1,RUNX1,TP53,TSC1,VHL	33
Cell Cycle	interphase of epithelial cells	2.38e-11	ATRX,BRCA1,CDKN1A,CDKN1B,CDKN2A,CHEK2,CYLD,E2F1,KRAS,MTOR,RB1,RUNX1,TGFBR2	13
Cell Death and Survival	apoptosis of hematopoietic progenitor cells	2.41e-11	APC,ATM,BCL2L11,BMF,BRCA1,CASP8,CDKN1A,CDKN2A,CHEK2,CREBBP,CTNNB1,CYLD,E2F1,EGR1,GNAS,HAX1,KMT2A,NFE2L2,NOTCH1,PPM1D,RB1,RUNX1,SF3B1,SMAD4,SOX17,TP53,VHL,WT1	28
Cellular Growth and Proliferation, Lymphoid Tissue Structure and Development	proliferation of lymphatic system cells	2.45e-11	ATM,B2M,BCL2L11,BRAF,BRCA1,CASP8,CBFB,CD58,CDH1,CDKN1A,CDKN1B,CDKN2A,CEBPA,CLEC4M,CTCF,CTNNB1,CYLD,E2F1,EGR1,EP300,EPHA2,FLT3,GATA3,GNAI2,HPGDS,HRAS,IFNGR1,IL1RL1,INPP4A,IRF2,JAK2,KIT,KLF3,KMT2A,KRAS,MAP2K4,MAP3K1,MARK2,MEN1,MTOR,MYB,MYBL1,NF1,NOTCH1,NRAS,PCGF2,PIK3CA,PIK3R1,PPM1D,PTEN,RAC1,RUNX1,RUNX1T1,SMAD4,SMARCA4,SOS2,SP3,STK11,TCF12,TGFBR2,TIMD4,TP53,TSC1,WT1	64
Cell Cycle	S phase	2.96e-11	APC,ATM,BRCA1,CDH1,CDKN1A,CDKN1B,CDKN2A,CHEK2,CREBBP,CUL3,DDX3X,E2F1,EGFR,EP300,HRAS,KRAS,MAX,MTOR,MYBL1,NOTCH1,NRAS,NRIP1,PGR,RB1,REV3L,RUNX1,SOX9,STK11,TFDP1,TGFBR2,TP53,TP53BP1	32
Cell Death and Survival	cell death of lung cancer cell lines	3.57e-11	AMER1,ATAD2,BAP1,BCL2L11,BRCA2,CASP8,CDKN1A,CDKN1B,CDKN2A,CEBPA,CHEK2,E2F1,EGFR,EP300,EPHA2,FOXA2,GNAS,HRAS,KEAP1,KMT2A,KRAS,MAP2K4,MTOR,NOTCH1,NRAS,PIK3CA,PPM1D,PTEN,RAC1,RB1,STK11,TP53,TP63	33
Cellular Growth and Proliferation, Connective Tissue Development and Function, Tissue Development	colony formation of fibroblast cell lines	5.21e-11	BRAF,CDKN2A,CTCF,EGFR,FGFR2,GNAI2,HRAS,KRAS,MEN1,NOTCH1,NOTCH2,NRAS,PTEN,RAC1,RB1,SPZ1,TP53,TSC2	18
Cell Death and Survival	cell death of hematopoietic progenitor cells	5.49e-11	APC,ATM,BCL2L11,BMF,BRCA1,CASP8,CDKN1A,CDKN2A,CHEK2,CREBBP,CTNNB1,CYLD,E2F1,EGR1,GNAS,HAX1,KMT2A,MAP2K4,NFE2L2,NOTCH1,PPM1D,RB1,RUNX1,SF3B1,SMAD4,SOX17,TP53,VHL,WT1	29
Cellular Growth and Proliferation	cytostasis of breast cancer cell lines	6e-11	BAP1,BRCA1,CDH1,CTNNB1,LATS1,NF2,PTEN,RB1,SMAD2,SMARCA1,SMARCA2,SMARCA4,TP53,TP63	14
Cellular Development, Cellular Growth and Proliferation	proliferation of leukemia cell lines	6.01e-11	ATM,CASP8,CDKN1A,CDKN1B,CEBPA,CTCF,CTNNB1,E2F1,EGR1,FLT3,HRAS,JAK2,KIT,KMT2A,KRAS,MLH1,MTOR,MYB,NOTCH1,NOTCH2,NRAS,PTEN,RAD21,RUNX1,RUNX2,STAG2,TP53,WT1	28
Cellular Development, Cellular Growth and Proliferation	proliferation of leukemia cell lines	6.01e-11	ATM,CASP8,CDKN1A,CDKN1B,CEBPA,CTCF,CTNNB1,E2F1,EGR1,FLT3,HRAS,JAK2,KIT,KMT2A,KRAS,MLH1,MTOR,MYB,NOTCH1,NOTCH2,NRAS,PTEN,RAD21,RUNX1,RUNX2,STAG2,TP53,WT1	28
Cell Death and Survival	apoptosis of lung cancer cell lines	6.62e-11	AMER1,ATAD2,BAP1,BCL2L11,BRCA2,CASP8,CDKN1A,CDKN1B,CDKN2A,CEBPA,CHEK2,E2F1,EGFR,EP300,EPHA2,FOXA2,GNAS,HRAS,KMT2A,KRAS,MAP2K4,MTOR,NOTCH1,NRAS,PIK3CA,RAC1,RB1,STK11,TP53,TP63	30
Cellular Development, Embryonic Development, Organismal Development, Tissue Development	differentiation of embryonic tissue	7.35e-11	AJUBA,BCOR,BRCA1,CCAR1,CDH1,CDKN1B,CNOT3,CTNNB1,FBXW7,FGFR2,FOXA2,HRAS,KDM6A,KIT,MAPK1,MEN1,MMP2,MSX2,MTOR,NOTCH1,PTEN,RB1,RBM46,RUNX1,RUNX2,SMAD4,SOX9,SP3,TP53,TP63,WT1,ZFHX3	32
Cellular Development, Skeletal and Muscular System Development and Function, Tissue Development	differentiation of muscle	7.76e-11	ARID1A,BCL9,BCL9L,CDH1,CDKN1A,CDKN2A,CEBPA,CTNNB1,DDX17,EGR1,FGF6,FGFR2,HRAS,JAK1,KLF5,KRAS,MAP2K4,MAPK1,MKL1,MSX2,MTOR,NOTCH1,PIK3R1,RAC1,RB1,RUNX1,SMAD4,SMARCA2,SMARCA4,SOX9,TBX3,TGFBR2,TP53,TP63,TSC1,ZFP36L1	36
Cell Death and Survival, Organismal Injury and Abnormalities	apoptosis of epithelial cells	8.5e-11	APC,ATM,ATRX,BCL2L11,BMF,BRAF,CASP8,CDH1,CDKN1A,CDKN1B,CDKN2A,CEBPA,E2F1,EGFR,EGR1,EPHA2,HRAS,IFNGR1,IRF3,KRAS,MAP2K4,MAPK1,MKL1,MMP2,MSX2,MTOR,MYB,NFE2L2,PTEN,RB1,RB1CC1,TP53,TP63	33
