# Supplementary material for: A general calculus of fitness landscapes finds genes under selection in cancers
Source: HighWire-hosted journal article supplement (doi:10.1101/gr.275811.121), 2022-03-17
Supplement: Supplemental_Table_S10.xlsx [file Supplemental_Table_S10.xlsx]

## Sheet: Table_S10
Table S10. IPA 313 novel genes
Categories	Diseases or Functions Annotation	q-Value	Molecules	Number of genes
Cancer, Organismal Injury and Abnormalities	melanoma	4.71e-21	ABCB1,ABCB5,ABL2,ACTG1,ACTL6B,ADH4,AGBL5,AGTR1,AHDC1,ALDH8A1,AMOT,ANGPTL6,APOH,APOO,ARHGAP5,ARMCX3,ASB11,ASH1L,ATAD2,ATF7IP,ATRNL1,BCL2L11,BCL9,BCL9L,BMF,BRD7,C12orf42,C1orf194,C6orf223,CADM4,CCAR1,CCDC140,CCDC66,CCDC73,CD300E,CEL,CFHR4,CLEC4M,CLSTN2,CNOT4,CNOT9,COL11A1,COL16A1,COL19A1,COL25A1,COL28A1,COL4A3,COL4A4,COL8A1,CPEB2,CRYBG3,CSMD3,CX3CL1,CYP7B1,DACH2,DARS,DCDC2,DCX,DDX17,DDX50,DMC1,DUSP…	241
Cancer, Organismal Injury and Abnormalities	abdominal cancer	2.45e-19	A1BG,ABCB1,ABCB5,ABL2,ACTG1,ACTL6B,ADH4,AGBL5,AGTR1,AHDC1,ALDH8A1,AMOT,AMY2A,ANGPTL6,APOH,ARHGAP5,ARMCX3,ASB11,ASH1L,ASPA,ATAD2,ATF7IP,ATRNL1,BCL2L11,BCL9,BCL9L,BIVM,BRD7,C12orf42,C6orf223,CCAR1,CCDC140,CCDC66,CCDC73,CCDC82,CCPG1,CD300E,CD58,CEL,CEP19,CETN3,CFHR4,CLDN5,CLEC4M,CLOCK,CLSTN2,CNOT4,CNOT9,COL11A1,COL16A1,COL19A1,COL25A1,COL28A1,COL4A3,COL4A4,COL8A1,CPEB2,CRYBG3,CSMD3,CUL3,CX3CL1,CYP7B…	292
Cancer, Gastrointestinal Disease, Organismal Injury and Abnormalities	gastrointestinal adenocarcinoma	1.87e-18	ABCB1,ABCB5,ABL2,ACTG1,ACTL6B,AGBL5,AHDC1,ALDH8A1,AMOT,AMY2A,ARHGAP5,ASH1L,ATAD2,ATF7IP,ATRNL1,BCL2L11,BCL9,BCL9L,CCDC140,CCDC66,CCDC73,CCPG1,CD58,CEL,CETN3,CFHR4,CLEC4M,CLOCK,CLSTN2,CNOT4,CNOT9,COL11A1,COL19A1,COL4A3,COL4A4,COL8A1,CPEB2,CRYBG3,CSMD3,CYP7B1,DCDC2,DCX,DDX17,DDX50,DUSP16,DYRK1A,EEF1A1,EGR1,EPHA5,ESRP1,FAM171B,FBXL17,FFAR2,FNBP4,FOXJ3,FOXP1,GALNT7,GALNTL5,GCC2,GIGYF2,GNAI2,GPRASP1,G…	187
Cancer, Gastrointestinal Disease, Organismal Injury and Abnormalities	tumorigenesis of digestive organ tumor	2.24e-18	ABCB1,ABCB5,ABL2,ACTG1,ACTL6B,AGBL5,AHDC1,ALDH8A1,AMOT,AMY2A,ARHGAP5,ASH1L,ATAD2,ATF7IP,ATRNL1,BCL2L11,BCL9,BCL9L,CCDC140,CCDC66,CCDC73,CCPG1,CD58,CEL,CETN3,CLEC4M,CLOCK,CLSTN2,CNOT4,CNOT9,COL11A1,COL19A1,COL4A3,COL4A4,COL8A1,CPEB2,CRYBG3,CSMD3,CYP7B1,DCDC2,DCX,DDX17,DDX50,DUSP16,DYRK1A,E2F1,EEF1A1,EGR1,EPHA5,ESRP1,FAM171B,FBXL17,FFAR2,FNBP4,FOXP1,GALNT7,GALNTL5,GCC2,GIGYF2,GNAI2,GPRASP1,GPRIN1,G…	186
Cancer, Gastrointestinal Disease, Organismal Injury and Abnormalities	digestive system cancer	2.24e-18	A1BG,ABCB1,ABCB5,ABL2,ACTG1,ACTL6B,ADH4,AGBL5,AGTR1,AHDC1,ALDH8A1,AMOT,AMY2A,ANGPTL6,ARHGAP5,ARMCX3,ASB11,ASH1L,ATAD2,ATF7IP,ATRNL1,BCL2L11,BCL9,BCL9L,BIVM,BRD7,C12orf42,C6orf223,CCAR1,CCDC140,CCDC66,CCDC73,CCDC82,CCPG1,CD58,CEL,CEP19,CETN3,CFHR4,CLDN5,CLEC4M,CLOCK,CLSTN2,CNOT4,CNOT9,COL11A1,COL16A1,COL19A1,COL25A1,COL28A1,COL4A3,COL4A4,COL8A1,CPEB2,CRYBG3,CSMD3,CYP7B1,DACH2,DARS,DCDC2,DCX,DDX17,…	278
Cancer, Organismal Injury and Abnormalities	tumorigenesis of malignant tumor	3.8e-18	ABCB1,ABCB5,ABL2,ACTG1,ACTL6B,AGBL5,AHDC1,ALDH8A1,AMOT,AMY2A,ARHGAP5,ASB11,ASH1L,ASPA,ATAD2,ATF7IP,ATRNL1,BCL2L11,BCL9,BCL9L,BMF,C12orf42,CCAR1,CCDC140,CCDC66,CCDC73,CCDC82,CCPG1,CD300E,CD58,CEL,CETN3,CLEC4M,CLOCK,CLSTN2,CNOT4,CNOT9,COL11A1,COL19A1,COL28A1,COL4A3,COL4A4,COL8A1,CPEB2,CRYBG3,CSMD3,CX3CL1,CYP7B1,DACH2,DCDC2,DCX,DDX17,DDX50,DUSP16,DYRK1A,DYTN,E2F1,EEF1A1,EGR1,EIF1AX,EPHA5,ESRP1,FAAH2…	230
Cancer, Organismal Injury and Abnormalities	tumorigenesis of carcinoma	5.01e-18	ABCB1,ABCB5,ABL2,ACTG1,ACTL6B,AGBL5,AHDC1,ALDH8A1,AMOT,AMY2A,ARHGAP5,ASB11,ASH1L,ASPA,ATAD2,ATF7IP,ATRNL1,BCL2L11,BCL9,BCL9L,C12orf42,CCAR1,CCDC140,CCDC66,CCDC73,CCDC82,CCPG1,CD300E,CD58,CEL,CETN3,CLEC4M,CLOCK,CLSTN2,CNOT4,CNOT9,COL11A1,COL19A1,COL28A1,COL4A3,COL4A4,COL8A1,CPEB2,CRYBG3,CSMD3,CX3CL1,CYP7B1,DACH2,DCDC2,DCX,DDX17,DDX50,DUSP16,DYRK1A,DYTN,E2F1,EEF1A1,EGR1,EIF1AX,EPHA5,ESRP1,FAAH2,FAM…	228
Cancer, Organismal Injury and Abnormalities	abdominal adenocarcinoma	8.01e-18	A1BG,ABCB1,ABCB5,ABL2,ACTG1,ACTL6B,ADH4,AGBL5,AHDC1,ALDH8A1,AMOT,AMY2A,ARHGAP5,ASB11,ASH1L,ASPA,ATAD2,ATF7IP,ATRNL1,BCL2L11,BCL9,BCL9L,C12orf42,CCAR1,CCDC140,CCDC66,CCDC73,CCDC82,CCPG1,CD300E,CD58,CEL,CETN3,CLDN5,CLEC4M,CLOCK,CLSTN2,CNOT4,CNOT9,COL11A1,COL19A1,COL25A1,COL28A1,COL4A3,COL4A4,COL8A1,CPEB2,CRYBG3,CSMD3,CX3CL1,CYP7B1,DACH2,DCDC2,DCX,DDX17,DDX50,DENND6A,DUSP16,DYRK1A,DYTN,EEF1A1,EGR1,E…	235
Cancer, Organismal Injury and Abnormalities	adenocarcinoma	1.08e-17	A1BG,ABCB1,ABCB5,ABL2,ACTG1,ACTL6B,ADH4,AGBL5,AGTR1,AHDC1,ALDH8A1,AMOT,AMY2A,ANGPTL6,ARHGAP5,ARMCX3,ASB11,ASH1L,ASPA,ATAD2,ATF7IP,ATRNL1,BCL2L11,BCL9,BCL9L,BIVM,BRD7,C12orf42,C6orf223,CCAR1,CCDC140,CCDC66,CCDC73,CCDC82,CCPG1,CD300E,CD58,CEL,CETN3,CFHR4,CLDN5,CLEC4M,CLOCK,CLSTN2,CNOT4,CNOT9,COL11A1,COL16A1,COL19A1,COL25A1,COL28A1,COL4A3,COL4A4,COL8A1,CPEB2,CRYBG3,CSMD3,CUL3,CX3CL1,CYP7B1,DACH2,DAR…	276
Cancer, Gastrointestinal Disease, Organismal Injury and Abnormalities	digestive organ tumor	1.42e-17	A1BG,ABCB1,ABCB5,ABL2,ACTG1,ACTL6B,ADH4,AGBL5,AGTR1,AHDC1,ALDH8A1,AMOT,AMY2A,ANGPTL6,ARHGAP5,ARMCX3,ASB11,ASH1L,ATAD2,ATF7IP,ATRNL1,BCL2L11,BCL9,BCL9L,BIVM,BRD7,C12orf42,C6orf223,CCAR1,CCDC140,CCDC66,CCDC73,CCDC82,CCPG1,CD58,CEL,CEP19,CETN3,CFHR4,CLDN5,CLEC4M,CLOCK,CLSTN2,CNOT4,CNOT9,COL11A1,COL16A1,COL19A1,COL25A1,COL28A1,COL4A3,COL4A4,COL8A1,CPEB2,CRYBG3,CSMD3,CYP7B1,DACH2,DARS,DCDC2,DCX,DDX17,…	279
Cancer, Organismal Injury and Abnormalities	tumorigenesis of epithelial neoplasm	1.5e-17	ABCB1,ABCB5,ABL2,ACTG1,ACTL6B,AGBL5,AHDC1,ALDH8A1,AMOT,AMY2A,ARHGAP5,ASB11,ASH1L,ASPA,ATAD2,ATF7IP,ATRNL1,BCL2L11,BCL9,BCL9L,C12orf42,CCAR1,CCDC140,CCDC66,CCDC73,CCDC82,CCPG1,CD300E,CD58,CEL,CETN3,CLEC4M,CLOCK,CLSTN2,CNOT4,CNOT9,COL11A1,COL19A1,COL28A1,COL4A3,COL4A4,COL8A1,CPEB2,CRYBG3,CSMD3,CX3CL1,CYP7B1,DACH2,DCDC2,DCX,DDX17,DDX50,DUSP16,DYRK1A,DYTN,E2F1,EEF1A1,EGR1,EIF1AX,EPHA5,ESRP1,FAAH2,FAM…	229
Cancer, Organismal Injury and Abnormalities	carcinoma	5.03e-17	A1BG,ABCB1,ABCB5,ABL2,ACTG1,ACTL6B,ADH4,AGBL5,AGTR1,AHDC1,ALDH8A1,AMOT,AMY2A,ANGPTL6,ARHGAP5,ARMCX3,ASB11,ASH1L,ASPA,ATAD2,ATF7IP,ATRNL1,BCL2L11,BCL9,BCL9L,BIVM,BRD7,C12orf42,C6orf223,CCAR1,CCDC140,CCDC66,CCDC73,CCDC82,CCPG1,CD300E,CD58,CEL,CEP19,CETN3,CFHR4,CLDN5,CLEC4M,CLOCK,CLSTN2,CNOT4,CNOT9,COL11A1,COL16A1,COL19A1,COL25A1,COL28A1,COL4A3,COL4A4,COL8A1,CPEB2,CRYBG3,CSMD3,CUL3,CX3CL1,CYP7B1,DAC…	290
Cancer, Organismal Injury and Abnormalities	malignant solid tumor	9.82e-16	A1BG,ABCB1,ABCB5,ABL2,ACTG1,ACTL6B,ADH4,AGBL5,AGTR1,AHDC1,ALDH8A1,AMOT,AMY2A,ANGPTL6,APOH,APOO,ARHGAP5,ARMCX3,ASB11,ASH1L,ASPA,ATAD2,ATF7IP,ATRNL1,BCL2L11,BCL9,BCL9L,BIVM,BMF,BRD7,C12orf42,C1orf194,C6orf223,CADM4,CCAR1,CCDC140,CCDC66,CCDC73,CCDC82,CCPG1,CD300E,CD58,CEL,CEP19,CETN3,CFHR4,CLDN5,CLEC4M,CLOCK,CLSTN2,CNOT4,CNOT9,COL11A1,COL16A1,COL19A1,COL25A1,COL28A1,COL4A3,COL4A4,COL8A1,CPEB2,CRYBG3…	300
Cancer, Organismal Injury and Abnormalities	non-melanoma solid tumor	1.17e-15	A1BG,ABCB1,ABCB5,ABL2,ACTG1,ACTL6B,ADH4,AGBL5,AGTR1,AHDC1,ALDH8A1,AMOT,AMY2A,ANGPTL6,ARHGAP5,ARMCX3,ASB11,ASH1L,ASPA,ATAD2,ATF7IP,ATRNL1,BCL2L11,BCL9,BCL9L,BIVM,BMF,BRD7,C12orf42,C6orf223,CCAR1,CCDC140,CCDC66,CCDC73,CCDC82,CCPG1,CD300E,CD58,CEL,CEP19,CETN3,CFHR4,CLDN5,CLEC4M,CLOCK,CLSTN2,CNOT4,CNOT9,COL11A1,COL16A1,COL19A1,COL25A1,COL28A1,COL4A3,COL4A4,COL8A1,CPEB2,CRYBG3,CSMD3,CUL3,CX3CL1,CYP7B1…	291
Cancer, Organismal Injury and Abnormalities	cancer	1.43e-15	A1BG,ABCB1,ABCB5,ABL2,ACTG1,ACTL6B,ADH4,AGBL5,AGTR1,AHDC1,ALDH8A1,AMOT,AMY2A,ANGPTL6,APOH,APOO,ARHGAP5,ARMCX3,ASB11,ASH1L,ASPA,ATAD2,ATF7IP,ATRNL1,BCL2L11,BCL9,BCL9L,BIVM,BMF,BRD7,C12orf42,C1orf194,C6orf223,CADM4,CCAR1,CCDC140,CCDC66,CCDC73,CCDC82,CCPG1,CD300E,CD58,CEL,CEP19,CETN3,CFHR4,CLDN5,CLEC4M,CLOCK,CLSTN2,CNOT4,CNOT9,COL11A1,COL16A1,COL19A1,COL25A1,COL28A1,COL4A3,COL4A4,COL8A1,CPEB2,CRYBG3…	301
Cancer, Gastrointestinal Disease, Organismal Injury and Abnormalities	gastrointestinal carcinoma	3.96e-15	A1BG,ABCB1,ABCB5,ABL2,ACTG1,ACTL6B,AGBL5,AGTR1,AHDC1,ALDH8A1,AMOT,AMY2A,ANGPTL6,ARHGAP5,ARMCX3,ASB11,ASH1L,ATAD2,ATF7IP,ATRNL1,BCL2L11,BCL9,BCL9L,BIVM,BRD7,C12orf42,C6orf223,CCAR1,CCDC140,CCDC66,CCDC73,CCPG1,CD58,CEL,CETN3,CFHR4,CLDN5,CLEC4M,CLOCK,CLSTN2,CNOT4,CNOT9,COL11A1,COL16A1,COL19A1,COL25A1,COL28A1,COL4A3,COL4A4,COL8A1,CPEB2,CRYBG3,CSMD3,CYP7B1,DACH2,DARS,DCDC2,DCX,DDX17,DDX50,DMC1,DUSP16,…	243
Cancer, Gastrointestinal Disease, Organismal Injury and Abnormalities	cecum adenocarcinoma	4.8e-15	ARHGAP5,BCL9,BCL9L,CCDC66,CEL,CLOCK,COL11A1,CPEB2,CSMD3,DDX17,EGR1,EPHA5,ESRP1,FAM171B,GRM1,IFFO1,IQCJ-SCHIP1,KIF21A,KLF3,LARP4B,LMAN1,MYH9,OLAH,PCLO,PDE10A,PLEKHA6,PNISR,RGS22,RTKN2,RUNX2,SCAF4,SMARCC2,SMTN,TEP1,TGIF1,TNRC6C,UBQLN2,ZBTB20,ZMYM3,ZNF233,ZNF493,ZNF660,ZNF668	43
Cancer, Dermatological Diseases and Conditions, Organismal Injury and Abnormalities	cutaneous melanoma	3.13e-14	ABCB1,ABCB5,ABL2,ACTG1,ACTL6B,ADH4,AGBL5,AGTR1,AMOT,ANGPTL6,APOH,ARHGAP5,ASH1L,ATAD2,ATF7IP,ATRNL1,BCL9,BCL9L,BRD7,C12orf42,CCAR1,CCDC140,CCDC73,CD300E,CEL,CFHR4,CLEC4M,CLSTN2,CNOT4,CNOT9,COL11A1,COL16A1,COL19A1,COL25A1,COL28A1,COL4A3,COL4A4,COL8A1,CPEB2,CRYBG3,CSMD3,CX3CL1,CYP7B1,DACH2,DARS,DCDC2,DCX,DDX17,DDX50,DMC1,DUSP16,DYRK1A,DYTN,E2F1,EEF1A1,EPHA5,ESRP1,FAAH2,FAM83B,FGF6,FNBP4,FOXJ3,FOXP1,…	201
Cancer, Gastrointestinal Disease, Organismal Injury and Abnormalities	gastrointestinal tract cancer	4.23e-14	A1BG,ABCB1,ABCB5,ABL2,ACTG1,ACTL6B,AGBL5,AGTR1,AHDC1,ALDH8A1,AMOT,AMY2A,ANGPTL6,ARHGAP5,ARMCX3,ASB11,ASH1L,ATAD2,ATF7IP,ATRNL1,BCL2L11,BCL9,BCL9L,BIVM,BRD7,C12orf42,C6orf223,CCAR1,CCDC140,CCDC66,CCDC73,CCPG1,CD58,CEL,CETN3,CFHR4,CLDN5,CLEC4M,CLOCK,CLSTN2,CNOT4,CNOT9,COL11A1,COL16A1,COL19A1,COL25A1,COL28A1,COL4A3,COL4A4,COL8A1,CPEB2,CRYBG3,CSMD3,CYP7B1,DACH2,DARS,DCDC2,DCX,DDX17,DDX50,DMC1,DUSP16,…	248
Cancer, Dermatological Diseases and Conditions, Organismal Injury and Abnormalities	skin tumor	4.23e-14	ABCB1,ABCB5,ABL2,ACTG1,ACTL6B,ADH4,AGBL5,AGTR1,AMOT,ANGPTL6,APOH,ARHGAP5,ARMCX3,ASH1L,ATAD2,ATF7IP,ATRNL1,BCL2L11,BCL9,BCL9L,BRD7,C12orf42,CCAR1,CCDC140,CCDC73,CD300E,CEL,CFHR4,CLEC4M,CLSTN2,CNOT4,CNOT9,COL11A1,COL16A1,COL19A1,COL25A1,COL28A1,COL4A3,COL4A4,COL8A1,CPEB2,CRYBG3,CSMD3,CX3CL1,CYP7B1,DACH2,DARS,DCDC2,DCX,DDX17,DDX50,DMC1,DUSP16,DYRK1A,DYTN,E2F1,EEF1A1,EGR1,EPHA5,ESRP1,FAAH2,FAM83B,FGF…	209
Cancer, Dermatological Diseases and Conditions, Organismal Injury and Abnormalities	skin cancer	4.65e-14	ABCB1,ABCB5,ABL2,ACTG1,ACTL6B,ADH4,AGBL5,AGTR1,AMOT,ANGPTL6,APOH,ARHGAP5,ARMCX3,ASH1L,ATAD2,ATF7IP,ATRNL1,BCL2L11,BCL9,BCL9L,BRD7,C12orf42,CCAR1,CCDC140,CCDC73,CD300E,CEL,CFHR4,CLEC4M,CLSTN2,CNOT4,CNOT9,COL11A1,COL16A1,COL19A1,COL25A1,COL28A1,COL4A3,COL4A4,COL8A1,CPEB2,CRYBG3,CSMD3,CX3CL1,CYP7B1,DACH2,DARS,DCDC2,DCX,DDX17,DDX50,DMC1,DUSP16,DYRK1A,DYTN,E2F1,EEF1A1,EPHA5,ESRP1,FAAH2,FAM83B,FGF6,FNB…	208
Cancer, Gastrointestinal Disease, Organismal Injury and Abnormalities	colorectal adenocarcinoma	1.2e-13	ABCB1,ABL2,ACTG1,ACTL6B,AGBL5,AHDC1,ALDH8A1,AMOT,ARHGAP5,ASH1L,ATAD2,ATF7IP,ATRNL1,BCL2L11,BCL9,BCL9L,CCDC140,CCDC66,CCDC73,CD58,CEL,CETN3,CLOCK,CNOT4,COL11A1,COL19A1,COL4A3,COL4A4,COL8A1,CPEB2,CRYBG3,CSMD3,CYP7B1,DCX,DDX17,DDX50,DUSP16,DYRK1A,EEF1A1,EGR1,EPHA5,ESRP1,FAM171B,FBXL17,FFAR2,FNBP4,FOXP1,GALNT7,GALNTL5,GCC2,GIGYF2,GNAI2,GPRIN1,GRM1,HNRNPUL1,HOXB7,HOXB9,HRCT1,HTR1E,IFFO1,IFNGR1,INPP4A,…	159
Cancer, Gastrointestinal Disease, Organismal Injury and Abnormalities	gastrointestinal neoplasia	1.2e-13	A1BG,ABCB1,ABCB5,ABL2,ACTG1,ACTL6B,AGBL5,AGTR1,AHDC1,ALDH8A1,AMOT,AMY2A,ANGPTL6,ARHGAP5,ARMCX3,ASB11,ASH1L,ATAD2,ATF7IP,ATRNL1,BCL2L11,BCL9,BCL9L,BIVM,BRD7,C12orf42,C6orf223,CCAR1,CCDC140,CCDC66,CCDC73,CCPG1,CD58,CEL,CETN3,CFHR4,CLDN5,CLEC4M,CLOCK,CLSTN2,CNOT4,CNOT9,COL11A1,COL16A1,COL19A1,COL25A1,COL28A1,COL4A3,COL4A4,COL8A1,CPEB2,CRYBG3,CSMD3,CYP7B1,DACH2,DARS,DCDC2,DCX,DDX17,DDX50,DMC1,DUSP16,…	251
Gastrointestinal Disease, Hepatic System Disease, Organismal Injury and Abnormalities	liver lesion	1.23e-13	A1BG,ABCB5,ABL2,ACTG1,ADH4,AGTR1,AHDC1,ALDH8A1,AMOT,AMY2A,ANGPTL6,ARHGAP5,ASB11,ASH1L,ATAD2,BCL2L11,BCL9L,BMF,BRD7,CCAR1,CCDC140,CCDC82,CD58,CEP19,CETN3,CFHR4,CLEC4M,CLSTN2,CNOT4,CNOT9,COL11A1,COL16A1,COL19A1,COL4A3,COL4A4,CPEB2,CRYBG3,CSMD3,CYP7B1,DARS,DCX,DDX17,E2F1,EEF1A1,EGR1,EIF1AX,EPHA5,FAM171B,FAM83B,FBXL17,FFAR2,FNBP4,FOXP1,GALNT7,GALNTL5,GCC2,GIGYF2,GOLIM4,GPRASP1,GPRIN1,HEPACAM2,HNRNPUL…	169
Cancer, Gastrointestinal Disease, Hepatic System Disease, Organismal Injury and Abnormalities	liver tumor	1.23e-13	A1BG,ABCB5,ABL2,ACTG1,ADH4,AHDC1,ALDH8A1,AMOT,ANGPTL6,ARHGAP5,ASB11,ASH1L,ATAD2,BCL2L11,BCL9L,BRD7,CCAR1,CCDC140,CCDC82,CD58,CEP19,CETN3,CFHR4,CLEC4M,CLSTN2,CNOT4,CNOT9,COL11A1,COL16A1,COL19A1,COL4A3,COL4A4,CPEB2,CRYBG3,CSMD3,CYP7B1,DARS,DCX,DDX17,E2F1,EEF1A1,EIF1AX,EPHA5,FAM171B,FAM83B,FBXL17,FFAR2,FNBP4,FOXP1,GALNT7,GALNTL5,GCC2,GIGYF2,GOLIM4,GPRASP1,GPRIN1,HEPACAM2,HNRNPUL1,HOXB7,HRASLS,HTR1E,…	164
Cancer, Gastrointestinal Disease, Hepatic System Disease, Organismal Injury and Abnormalities	hepatobiliary system cancer	1.59e-13	A1BG,ABCB5,ABL2,ACTG1,ADH4,AHDC1,ALDH8A1,AMOT,ANGPTL6,ARHGAP5,ASB11,ASH1L,ATAD2,BCL2L11,BCL9L,BRD7,CCAR1,CCDC140,CCDC73,CCDC82,CD58,CEP19,CETN3,CFHR4,CLEC4M,CLSTN2,CNOT4,CNOT9,COL11A1,COL16A1,COL19A1,COL4A3,COL4A4,CPEB2,CRYBG3,CSMD3,CYP7B1,DARS,DCX,DDX17,E2F1,EEF1A1,EIF1AX,EPHA5,ESRP1,FAM171B,FAM83B,FBXL17,FFAR2,FNBP4,FOXP1,GALNT7,GALNTL5,GCC2,GIGYF2,GOLIM4,GPRASP1,GPRIN1,HEPACAM2,HNRNPUL1,HOXB7,…	163
Cancer, Gastrointestinal Disease, Organismal Injury and Abnormalities	colon cancer	1.59e-13	ABCB1,ABL2,ACTG1,ACTL6B,AGBL5,AHDC1,ALDH8A1,AMOT,ARHGAP5,ASH1L,ATAD2,ATF7IP,ATRNL1,BCL2L11,BCL9,BCL9L,CCDC140,CCDC66,CCDC73,CD58,CEL,CETN3,CLOCK,CNOT4,COL11A1,COL19A1,COL4A3,COL4A4,COL8A1,CPEB2,CRYBG3,CSMD3,CYP7B1,DCX,DDX17,DDX50,DUSP16,DYRK1A,E2F1,EEF1A1,EGR1,EPHA5,ESRP1,FAM171B,FBXL17,FFAR2,FNBP4,FOXP1,GALNT7,GALNTL5,GCC2,GIGYF2,GRM1,HMGB2,HNRNPUL1,HOXB7,HOXB9,HPGDS,HRCT1,HTR1E,IFFO1,IFNGR1,IQC…	161
Cancer, Gastrointestinal Disease, Organismal Injury and Abnormalities	colon tumor	1.59e-13	ABCB1,ABL2,ACTG1,ACTL6B,AGBL5,AHDC1,ALDH8A1,AMOT,ARHGAP5,ASH1L,ATAD2,ATF7IP,ATRNL1,BCL2L11,BCL9,BCL9L,CCDC140,CCDC66,CCDC73,CD58,CEL,CETN3,CLOCK,CNOT4,COL11A1,COL19A1,COL4A3,COL4A4,COL8A1,CPEB2,CRYBG3,CSMD3,CYP7B1,DCX,DDX17,DDX50,DUSP16,DYRK1A,E2F1,EEF1A1,EGR1,EPHA5,ESRP1,FAM171B,FBXL17,FFAR2,FNBP4,FOXP1,GALNT7,GALNTL5,GCC2,GIGYF2,GRM1,HMGB2,HNRNPUL1,HOXB7,HOXB9,HPGDS,HRCT1,HTR1E,IFFO1,IFNGR1,IQC…	162
Cancer, Gastrointestinal Disease, Organismal Injury and Abnormalities	colon carcinoma	1.69e-13	ABCB1,ABL2,ACTG1,ACTL6B,AGBL5,AHDC1,ALDH8A1,AMOT,ARHGAP5,ASH1L,ATAD2,ATF7IP,ATRNL1,BCL2L11,BCL9,BCL9L,CCDC140,CCDC66,CCDC73,CD58,CEL,CETN3,CLOCK,CNOT4,COL11A1,COL19A1,COL4A3,COL4A4,COL8A1,CPEB2,CRYBG3,CSMD3,CYP7B1,DCX,DDX17,DDX50,DUSP16,DYRK1A,EEF1A1,EGR1,EPHA5,ESRP1,FAM171B,FBXL17,FFAR2,FNBP4,FOXP1,GALNT7,GALNTL5,GCC2,GIGYF2,GRM1,HNRNPUL1,HOXB7,HOXB9,HRCT1,HTR1E,IFFO1,IFNGR1,IQCJ-SCHIP1,JMJD1C,J…	156
Cancer, Gastrointestinal Disease, Organismal Injury and Abnormalities	colon adenocarcinoma	2.43e-13	ABL2,ACTG1,ACTL6B,AGBL5,AHDC1,ALDH8A1,AMOT,ARHGAP5,ASH1L,ATAD2,ATF7IP,ATRNL1,BCL2L11,BCL9,BCL9L,CCDC140,CCDC66,CCDC73,CD58,CEL,CETN3,CLOCK,CNOT4,COL11A1,COL19A1,COL4A3,COL4A4,COL8A1,CPEB2,CRYBG3,CSMD3,CYP7B1,DCX,DDX17,DDX50,DUSP16,DYRK1A,EEF1A1,EGR1,EPHA5,ESRP1,FAM171B,FBXL17,FFAR2,FNBP4,FOXP1,GALNT7,GALNTL5,GCC2,GIGYF2,GRM1,HNRNPUL1,HOXB7,HOXB9,HRCT1,HTR1E,IFFO1,IFNGR1,IQCJ-SCHIP1,JMJD1C,JPH1,KC…	154
Cancer, Gastrointestinal Disease, Organismal Injury and Abnormalities	colorectal carcinoma	4.15e-13	ABCB1,ABL2,ACTG1,ACTL6B,AGBL5,AHDC1,ALDH8A1,AMOT,ARHGAP5,ASH1L,ATAD2,ATF7IP,ATRNL1,BCL2L11,BCL9,BCL9L,CCDC140,CCDC66,CCDC73,CD58,CEL,CETN3,CLOCK,CNOT4,COL11A1,COL19A1,COL4A3,COL4A4,COL8A1,CPEB2,CRYBG3,CSMD3,CYP7B1,DCX,DDX17,DDX50,DUSP16,DYRK1A,EEF1A1,EGR1,EPHA5,ESRP1,FAM171B,FBXL17,FFAR2,FNBP4,FOXP1,GALNT7,GALNTL5,GCC2,GIGYF2,GNAI2,GPRIN1,GRM1,HNRNPUL1,HOXB7,HOXB9,HRCT1,HTR1E,IFFO1,IFNGR1,INPP4A,…	160
Cancer, Gastrointestinal Disease, Hepatic System Disease, Organismal Injury and Abnormalities	liver cancer	7.81e-13	A1BG,ABCB5,ABL2,ACTG1,ADH4,AHDC1,ALDH8A1,AMOT,ANGPTL6,ARHGAP5,ASB11,ASH1L,ATAD2,BCL2L11,BCL9L,BRD7,CCAR1,CCDC140,CCDC82,CD58,CEP19,CETN3,CFHR4,CLEC4M,CLSTN2,CNOT4,CNOT9,COL11A1,COL16A1,COL19A1,COL4A3,COL4A4,CPEB2,CRYBG3,CSMD3,CYP7B1,DARS,DCX,DDX17,E2F1,EEF1A1,EIF1AX,EPHA5,FAM171B,FAM83B,FBXL17,FFAR2,FNBP4,FOXP1,GALNT7,GALNTL5,GCC2,GIGYF2,GOLIM4,GPRASP1,GPRIN1,HEPACAM2,HNRNPUL1,HOXB7,HRASLS,HTR1E,…	159
Cancer, Gastrointestinal Disease, Hepatic System Disease, Organismal Injury and Abnormalities	liver carcinoma	8.98e-13	ABCB5,ABL2,ACTG1,AHDC1,ALDH8A1,AMOT,ANGPTL6,ARHGAP5,ASB11,ASH1L,ATAD2,BCL2L11,BCL9L,BRD7,CCAR1,CCDC140,CCDC82,CD58,CEP19,CETN3,CFHR4,CLEC4M,CLSTN2,CNOT4,CNOT9,COL11A1,COL16A1,COL19A1,COL4A3,COL4A4,CPEB2,CRYBG3,CSMD3,CYP7B1,DARS,DCX,DDX17,E2F1,EEF1A1,EPHA5,FAM171B,FAM83B,FBXL17,FFAR2,FNBP4,FOXP1,GALNT7,GALNTL5,GCC2,GIGYF2,GOLIM4,GPRASP1,GPRIN1,HEPACAM2,HNRNPUL1,HOXB7,HRASLS,HTR1E,IFFO1,IFNGR1,INPP…	155
Cancer, Organismal Injury and Abnormalities	pelvic tumor	1.43e-12	A1BG,ABCB1,ABCB5,ABL2,ACTG1,AGBL5,AGTR1,ALDH8A1,APOH,ARHGAP5,ASB11,ASH1L,ASPA,ATAD2,ATF7IP,ATRNL1,BCL2L11,BCL9,BCL9L,C12orf42,CCAR1,CCDC140,CCDC66,CCDC73,CCDC82,CCPG1,CD300E,CEL,CETN3,CLDN5,CLEC4M,CLSTN2,CNOT4,CNOT9,COL11A1,COL19A1,COL28A1,COL4A4,COL8A1,CRYBG3,CSMD3,CUL3,CX3CL1,DACH1,DACH2,DARS,DDX17,DDX50,DMC1,DYRK1A,DYTN,E2F1,EGR1,EIF1AX,EPHA5,ESRP1,FAAH2,FAM122A,FAM83B,FAM98C,FBXL17,FFAR2,FGF6…	196
Cancer, Gastrointestinal Disease, Organismal Injury and Abnormalities	intestinal adenocarcinoma	2.52e-12	A1BG,ABCB1,ABL2,ACTG1,ACTL6B,AGBL5,AGTR1,AHDC1,ALDH8A1,AMOT,ANGPTL6,ARHGAP5,ARMCX3,ASB11,ASH1L,ATAD2,ATF7IP,ATRNL1,BCL2L11,BCL9,BCL9L,BIVM,BRD7,C12orf42,C6orf223,CCAR1,CCDC140,CCDC66,CCDC73,CCPG1,CD58,CEL,CETN3,CFHR4,CLDN5,CLEC4M,CLOCK,CLSTN2,CNOT4,COL11A1,COL16A1,COL19A1,COL25A1,COL28A1,COL4A3,COL4A4,COL8A1,CPEB2,CRYBG3,CSMD3,CYP7B1,DARS,DCX,DDX17,DDX50,DMC1,DUSP16,DYRK1A,EEF1A1,EGR1,EPHA5,ESRP1…	227
Cancer, Gastrointestinal Disease, Organismal Injury and Abnormalities	intestinal carcinoma	4.17e-12	A1BG,ABCB1,ABL2,ACTG1,ACTL6B,AGBL5,AGTR1,AHDC1,ALDH8A1,AMOT,ANGPTL6,ARHGAP5,ARMCX3,ASB11,ASH1L,ATAD2,ATF7IP,ATRNL1,BCL2L11,BCL9,BCL9L,BIVM,BRD7,C12orf42,C6orf223,CCAR1,CCDC140,CCDC66,CCDC73,CCPG1,CD58,CEL,CETN3,CFHR4,CLDN5,CLEC4M,CLOCK,CLSTN2,CNOT4,COL11A1,COL16A1,COL19A1,COL25A1,COL28A1,COL4A3,COL4A4,COL8A1,CPEB2,CRYBG3,CSMD3,CYP7B1,DARS,DCX,DDX17,DDX50,DMC1,DUSP16,DYRK1A,EEF1A1,EGR1,EPHA5,ESRP1…	228
Cancer, Organismal Injury and Abnormalities, Reproductive System Disease	tumorigenesis of genital organ	4.7e-12	A1BG,ABCB1,ABCB5,ABL2,ACTG1,AGBL5,AGTR1,ALDH8A1,APOH,ARHGAP5,ASB11,ASH1L,ASPA,ATAD2,ATF7IP,ATRNL1,BCL2L11,BCL9,BCL9L,C12orf42,CCAR1,CCDC140,CCDC73,CCDC82,CCPG1,CD300E,CEL,CETN3,CLDN5,CLEC4M,CLSTN2,CNOT4,CNOT9,COL11A1,COL19A1,COL28A1,COL4A4,COL8A1,CRYBG3,CSMD3,CUL3,CX3CL1,DACH1,DACH2,DARS,DCX,DDX17,DDX50,DMC1,DYRK1A,DYTN,E2F1,EGR1,EIF1AX,EPHA5,ESRP1,FAAH2,FAM122A,FAM83B,FAM98C,FBXL17,FFAR2,FGF6,FO…	192
Cancer, Organismal Injury and Abnormalities	pelvic cancer	4.7e-12	A1BG,ABCB1,ABCB5,ABL2,ACTG1,AGBL5,AGTR1,ALDH8A1,APOH,ARHGAP5,ASB11,ASH1L,ASPA,ATAD2,ATF7IP,ATRNL1,BCL2L11,BCL9,BCL9L,C12orf42,CCAR1,CCDC140,CCDC66,CCDC73,CCDC82,CCPG1,CD300E,CEL,CETN3,CLDN5,CLEC4M,CLSTN2,CNOT4,CNOT9,COL11A1,COL19A1,COL28A1,COL4A4,COL8A1,CRYBG3,CSMD3,CUL3,CX3CL1,DACH1,DACH2,DARS,DDX17,DDX50,DMC1,DYRK1A,DYTN,E2F1,EIF1AX,EPHA5,ESRP1,FAAH2,FAM122A,FAM83B,FAM98C,FBXL17,FFAR2,FGF6,FOXJ…	194
Cancer, Organismal Injury and Abnormalities, Reproductive System Disease	genital tumor	4.7e-12	A1BG,ABCB1,ABCB5,ABL2,ACTG1,AGBL5,AGTR1,ALDH8A1,APOH,ARHGAP5,ASB11,ASH1L,ASPA,ATAD2,ATF7IP,ATRNL1,BCL2L11,BCL9,BCL9L,C12orf42,CCAR1,CCDC140,CCDC73,CCDC82,CCPG1,CD300E,CEL,CETN3,CLDN5,CLEC4M,CLSTN2,CNOT4,CNOT9,COL11A1,COL19A1,COL28A1,COL4A4,COL8A1,CRYBG3,CSMD3,CUL3,CX3CL1,DACH1,DACH2,DARS,DCX,DDX17,DDX50,DMC1,DYRK1A,DYTN,E2F1,EGR1,EIF1AX,EPHA5,ESRP1,FAAH2,FAM122A,FAM83B,FAM98C,FBXL17,FFAR2,FGF6,FO…	192
Cancer, Organismal Injury and Abnormalities	endometrioid carcinoma	1.27e-11	ABCB1,ABCB5,ACTG1,AGBL5,ALDH8A1,ASB11,ASH1L,ASPA,ATAD2,ATF7IP,C12orf42,CCAR1,CCDC140,CCDC73,CCDC82,CCPG1,CD300E,CETN3,CNOT4,COL11A1,COL19A1,COL28A1,COL4A4,CRYBG3,CSMD3,CX3CL1,DACH2,DDX50,DYRK1A,DYTN,EIF1AX,EPHA5,ESRP1,FAAH2,FAM122A,FAM83B,FAM98C,FFAR2,FOXJ3,GALNT7,GIGYF2,GPRASP1,INPP4A,IQCJ-SCHIP1,IQCK,JMJD1C,KDF1,KIF21A,LATS1,LCA5L,LDAH,LSM11,LUC7L2,MAEL,MAP3K13,MARCH11,MCTP1,MSRB3,MSX2,MUC7,MYB…	121
Cancer, Organismal Injury and Abnormalities	genitourinary tumor	1.27e-11	A1BG,ABCB1,ABCB5,ABL2,ACTG1,AGBL5,AGTR1,ALDH8A1,APOH,ARHGAP5,ASB11,ASH1L,ASPA,ATAD2,ATF7IP,ATRNL1,BCL2L11,BCL9,BCL9L,C12orf42,CCAR1,CCDC140,CCDC73,CCDC82,CCPG1,CD300E,CEL,CETN3,CLDN5,CLEC4M,CLSTN2,CNOT4,CNOT9,COL11A1,COL19A1,COL28A1,COL4A4,COL8A1,CPEB2,CRYBG3,CSMD3,CUL3,CX3CL1,DACH1,DACH2,DARS,DCX,DDX17,DDX50,DMC1,DYRK1A,DYTN,E2F1,EGR1,EIF1AX,EPHA5,ESRP1,FAAH2,FAM122A,FAM83B,FAM98C,FBXL17,FFAR2,F…	201
Cancer, Organismal Injury and Abnormalities, Reproductive System Disease	genital tract cancer	1.4e-11	A1BG,ABCB1,ABCB5,ABL2,ACTG1,AGBL5,AGTR1,ALDH8A1,APOH,ARHGAP5,ASB11,ASH1L,ASPA,ATAD2,ATF7IP,ATRNL1,BCL2L11,BCL9,BCL9L,C12orf42,CCAR1,CCDC140,CCDC73,CCDC82,CCPG1,CD300E,CEL,CETN3,CLDN5,CLEC4M,CLSTN2,CNOT4,CNOT9,COL11A1,COL19A1,COL28A1,COL4A4,COL8A1,CRYBG3,CSMD3,CUL3,CX3CL1,DACH1,DACH2,DARS,DDX17,DDX50,DMC1,DYRK1A,DYTN,E2F1,EIF1AX,EPHA5,ESRP1,FAAH2,FAM122A,FAM83B,FAM98C,FBXL17,FFAR2,FGF6,FOXJ3,GALNT…	188
Cancer, Organismal Injury and Abnormalities	genitourinary carcinoma	1.5e-11	ABCB1,ABCB5,ABL2,ACTG1,AGBL5,ALDH8A1,ARHGAP5,ASB11,ASH1L,ASPA,ATAD2,ATF7IP,ATRNL1,BCL2L11,BCL9,BCL9L,C12orf42,CCAR1,CCDC140,CCDC73,CCDC82,CCPG1,CD300E,CEL,CETN3,CLEC4M,CLSTN2,CNOT4,CNOT9,COL11A1,COL19A1,COL28A1,COL4A4,COL8A1,CPEB2,CRYBG3,CSMD3,CUL3,CX3CL1,DACH2,DARS,DDX17,DDX50,DMC1,DYRK1A,DYTN,EIF1AX,EPHA5,ESRP1,FAAH2,FAM122A,FAM83B,FAM98C,FBXL17,FFAR2,FGF6,FOXJ3,GALNT7,GIGYF2,GNAI2,GOLIM4,GPRAS…	187
Cancer, Organismal Injury and Abnormalities	breast or colorectal cancer	1.64e-11	ABCB1,ABL2,ACTG1,ACTL6B,AGBL5,AHDC1,ALDH8A1,AMOT,ARHGAP5,ASH1L,ATAD2,ATF7IP,ATRNL1,BCL2L11,BCL9,BCL9L,CCDC140,CCDC66,CCDC73,CCDC82,CD58,CEL,CETN3,CLOCK,CLSTN2,CNOT4,COL11A1,COL19A1,COL4A3,COL4A4,COL8A1,CPEB2,CRYBG3,CSMD3,CYP7B1,DACH1,DCX,DDX17,DDX50,DUSP16,DYRK1A,E2F1,EEF1A1,EGR1,EPHA5,ESRP1,FAM171B,FAM98C,FBXL17,FFAR2,FGF6,FNBP4,FOXP1,GALNT7,GALNTL5,GCC2,GIGYF2,GNAI2,GPRIN1,GRM1,GTPBP4,HAX1,HMGB…	186
Cancer, Gastrointestinal Disease, Organismal Injury and Abnormalities	large intestine adenocarcinoma	2.36e-11	A1BG,ABCB1,ABL2,ACTG1,ACTL6B,AGBL5,AGTR1,AHDC1,ALDH8A1,AMOT,ANGPTL6,ARHGAP5,ARMCX3,ASB11,ASH1L,ATAD2,ATF7IP,ATRNL1,BCL2L11,BCL9,BCL9L,BIVM,BRD7,C12orf42,C6orf223,CCAR1,CCDC140,CCDC66,CCDC73,CCPG1,CD58,CEL,CETN3,CFHR4,CLDN5,CLEC4M,CLOCK,CLSTN2,CNOT4,COL11A1,COL16A1,COL19A1,COL25A1,COL28A1,COL4A3,COL4A4,COL8A1,CPEB2,CRYBG3,CSMD3,CYP7B1,DARS,DCX,DDX17,DDX50,DMC1,DUSP16,DYRK1A,EEF1A1,EGR1,EPHA5,ESRP1…	224
Cancer, Organismal Injury and Abnormalities, Reproductive System Disease	tumorigenesis of genital tumor	3.07e-11	ABCB1,ABCB5,ACTG1,AGBL5,ALDH8A1,ASB11,ASH1L,ASPA,ATAD2,ATF7IP,C12orf42,CCAR1,CCDC140,CCDC73,CCDC82,CCPG1,CD300E,CETN3,CNOT4,COL11A1,COL19A1,COL28A1,COL4A4,CRYBG3,CSMD3,CX3CL1,DACH2,DDX50,DYRK1A,DYTN,EIF1AX,EPHA5,ESRP1,FAAH2,FAM122A,FAM83B,FAM98C,FFAR2,FOXJ3,GALNT7,GIGYF2,GPRASP1,GTPBP4,HIST1H2BI,INPP4A,IQCJ-SCHIP1,IQCK,JMJD1C,KDF1,KIF21A,LATS1,LCA5L,LDAH,LSM11,LUC7L2,MAEL,MAP3K13,MARCH11,MCTP1,MM…	126
Cancer, Organismal Injury and Abnormalities	urogenital cancer	3.07e-11	A1BG,ABCB1,ABCB5,ABL2,ACTG1,AGBL5,AGTR1,ALDH8A1,APOH,ARHGAP5,ASB11,ASH1L,ASPA,ATAD2,ATF7IP,ATRNL1,BCL2L11,BCL9,BCL9L,C12orf42,CCAR1,CCDC140,CCDC73,CCDC82,CCPG1,CD300E,CEL,CETN3,CLDN5,CLEC4M,CLSTN2,CNOT4,CNOT9,COL11A1,COL19A1,COL28A1,COL4A4,COL8A1,CPEB2,CRYBG3,CSMD3,CUL3,CX3CL1,DACH1,DACH2,DARS,DDX17,DDX50,DMC1,DYRK1A,DYTN,E2F1,EIF1AX,EPHA5,ESRP1,FAAH2,FAM122A,FAM83B,FAM98C,FBXL17,FFAR2,FGF6,FOXJ3…	197
Cancer, Gastrointestinal Disease, Organismal Injury and Abnormalities	large intestine carcinoma	3.07e-11	A1BG,ABCB1,ABL2,ACTG1,ACTL6B,AGBL5,AGTR1,AHDC1,ALDH8A1,AMOT,ANGPTL6,ARHGAP5,ARMCX3,ASB11,ASH1L,ATAD2,ATF7IP,ATRNL1,BCL2L11,BCL9,BCL9L,BIVM,BRD7,C12orf42,C6orf223,CCAR1,CCDC140,CCDC66,CCDC73,CCPG1,CD58,CEL,CETN3,CFHR4,CLDN5,CLEC4M,CLOCK,CLSTN2,CNOT4,COL11A1,COL16A1,COL19A1,COL25A1,COL28A1,COL4A3,COL4A4,COL8A1,CPEB2,CRYBG3,CSMD3,CYP7B1,DARS,DCX,DDX17,DDX50,DMC1,DUSP16,DYRK1A,EEF1A1,EGR1,EPHA5,ESRP1…	225
Cancer, Gastrointestinal Disease, Organismal Injury and Abnormalities	upper gastrointestinal tract tumor	3.53e-11	A1BG,ABCB1,ABCB5,AMY2A,ANGPTL6,ARHGAP5,ASH1L,ATRNL1,BCL9,CCAR1,CCDC73,CCPG1,CFHR4,CLEC4M,CLOCK,CLSTN2,CNOT4,CNOT9,COL11A1,COL4A4,COL8A1,CSMD3,CYP7B1,DACH2,DCDC2,DYRK1A,EPHA5,ESRP1,FAAH2,FAM171B,FFAR2,FNBP4,FOXJ3,FOXP1,GALNT7,GALNTL5,GCC2,GIGYF2,GPRASP1,GPRIN1,GRM1,HAX1,HMGB2,HOXB9,IL1RL1,IRF2,JPH1,KIAA0907,KIF21A,KLF3,KLF5,LARP4B,LDAH,LIN7A,LMAN1,MAPT,MARCH11,MARK2,MEX3C,MEX3D,MMP2,MSRB3,MUC7,MYB…	112
Cancer, Organismal Injury and Abnormalities, Reproductive System Disease	tumorigenesis of reproductive tract	4.51e-11	A1BG,ABCB1,ABCB5,ACTG1,AGBL5,ALDH8A1,APOH,ASB11,ASH1L,ASPA,ATAD2,ATF7IP,ATRNL1,BCL2L11,C12orf42,CCAR1,CCDC140,CCDC73,CCDC82,CCPG1,CD300E,CETN3,CLDN5,CLEC4M,CNOT4,COL11A1,COL19A1,COL28A1,COL4A4,CRYBG3,CSMD3,CX3CL1,DACH1,DACH2,DCX,DDX50,DMC1,DYRK1A,DYTN,E2F1,EIF1AX,EPHA5,ESRP1,FAAH2,FAM122A,FAM83B,FAM98C,FFAR2,FOXJ3,GALNT7,GIGYF2,GNAI2,GPRASP1,GTPBP4,HIST1H2BI,IFNGR1,INPP4A,IQCJ-SCHIP1,IQCK,JMJD1C,…	143
Cancer, Organismal Injury and Abnormalities, Reproductive System Disease	female genital neoplasm	4.75e-11	A1BG,ABCB1,ABCB5,ACTG1,AGBL5,ALDH8A1,APOH,ASB11,ASH1L,ASPA,ATAD2,ATF7IP,ATRNL1,BCL2L11,C12orf42,CCAR1,CCDC140,CCDC73,CCDC82,CCPG1,CD300E,CETN3,CLDN5,CLEC4M,CNOT4,COL11A1,COL19A1,COL28A1,COL4A4,CRYBG3,CSMD3,CX3CL1,DACH1,DACH2,DCX,DDX50,DMC1,DYRK1A,DYTN,E2F1,EIF1AX,EPHA5,ESRP1,FAAH2,FAM122A,FAM83B,FAM98C,FFAR2,FOXJ3,GALNT7,GIGYF2,GNAI2,GPRASP1,GTPBP4,HIST1H2BI,IFNGR1,INPP4A,IQCJ-SCHIP1,IQCK,JMJD1C,…	143
Cancer, Gastrointestinal Disease, Organismal Injury and Abnormalities	colorectal neoplasia	5.59e-11	ABCB1,ABL2,ACTG1,ACTL6B,AGBL5,AHDC1,ALDH8A1,AMOT,AMY2A,ARHGAP5,ASH1L,ATAD2,ATF7IP,ATRNL1,BCL2L11,BCL9,BCL9L,CCDC140,CCDC66,CCDC73,CD58,CEL,CETN3,CLOCK,CNOT4,COL11A1,COL19A1,COL4A3,COL4A4,COL8A1,CPEB2,CRYBG3,CSMD3,CYP7B1,DCX,DDX17,DDX50,DUSP16,DYRK1A,E2F1,EEF1A1,EGR1,EPHA5,ESRP1,FAM171B,FBXL17,FFAR2,FGF6,FNBP4,FOXP1,GALNT7,GALNTL5,GCC2,GIGYF2,GNAI2,GPRIN1,GRM1,HMGB2,HNRNPUL1,HOXB7,HOXB9,HPGDS,HRCT…	170
Cancer, Gastrointestinal Disease, Organismal Injury and Abnormalities	colorectal cancer	6.05e-11	ABCB1,ABL2,ACTG1,ACTL6B,AGBL5,AHDC1,ALDH8A1,AMOT,ARHGAP5,ASH1L,ATAD2,ATF7IP,ATRNL1,BCL2L11,BCL9,BCL9L,CCDC140,CCDC66,CCDC73,CD58,CEL,CETN3,CLOCK,CNOT4,COL11A1,COL19A1,COL4A3,COL4A4,COL8A1,CPEB2,CRYBG3,CSMD3,CYP7B1,DCX,DDX17,DDX50,DUSP16,DYRK1A,E2F1,EEF1A1,EGR1,EPHA5,ESRP1,FAM171B,FBXL17,FFAR2,FGF6,FNBP4,FOXP1,GALNT7,GALNTL5,GCC2,GIGYF2,GNAI2,GPRIN1,GRM1,HMGB2,HNRNPUL1,HOXB7,HOXB9,HPGDS,HRCT1,HTR1…	168
Cancer, Organismal Injury and Abnormalities, Reproductive System Disease	endometrioid endometrial adenocarcinoma	8.55e-11	ABCB1,ABCB5,AGBL5,ALDH8A1,ASB11,ASH1L,ASPA,ATAD2,ATF7IP,C12orf42,CCAR1,CCDC140,CCDC73,CCDC82,CCPG1,CD300E,CETN3,COL19A1,COL28A1,CRYBG3,CSMD3,CX3CL1,DACH2,DDX50,DYRK1A,DYTN,EIF1AX,ESRP1,FAAH2,FAM122A,FAM83B,FAM98C,FOXJ3,GALNT7,GIGYF2,GPRASP1,INPP4A,IQCK,KDF1,KIF21A,LATS1,LDAH,LSM11,LUC7L2,MAEL,MARCH11,MCTP1,MUC7,MYBL1,NAA15,NCKAP5L,NIPBL,NONO,OR2M3,OR4D5,OR51A4,OR5M3,OSBPL10,PCLO,PDXK,PDZRN4,PER3,…	101
Cancer, Organismal Injury and Abnormalities, Reproductive System Disease	female genital tract cancer	1.13e-10	A1BG,ABCB1,ABCB5,ACTG1,AGBL5,ALDH8A1,APOH,ASB11,ASH1L,ASPA,ATAD2,ATF7IP,BCL2L11,C12orf42,CCAR1,CCDC140,CCDC73,CCDC82,CCPG1,CD300E,CETN3,CLDN5,CLEC4M,CNOT4,COL11A1,COL19A1,COL28A1,COL4A4,CRYBG3,CSMD3,CX3CL1,DACH1,DACH2,DDX50,DMC1,DYRK1A,DYTN,E2F1,EIF1AX,EPHA5,ESRP1,FAAH2,FAM122A,FAM83B,FAM98C,FFAR2,FOXJ3,GALNT7,GIGYF2,GPRASP1,GTPBP4,HIST1H2BI,IFNGR1,INPP4A,IQCJ-SCHIP1,IQCK,JMJD1C,KDF1,KIF21A,KLF3,…	138
Cancer, Gastrointestinal Disease, Organismal Injury and Abnormalities	intestinal tumor	1.56e-10	A1BG,ABCB1,ABL2,ACTG1,ACTL6B,AGBL5,AGTR1,AHDC1,ALDH8A1,AMOT,AMY2A,ANGPTL6,ARHGAP5,ARMCX3,ASB11,ASH1L,ATAD2,ATF7IP,ATRNL1,BCL2L11,BCL9,BCL9L,BIVM,BRD7,C12orf42,C6orf223,CCAR1,CCDC140,CCDC66,CCDC73,CCPG1,CD58,CEL,CETN3,CFHR4,CLDN5,CLEC4M,CLOCK,CLSTN2,CNOT4,COL11A1,COL16A1,COL19A1,COL25A1,COL28A1,COL4A3,COL4A4,COL8A1,CPEB2,CRYBG3,CSMD3,CYP7B1,DARS,DCX,DDX17,DDX50,DMC1,DUSP16,DYRK1A,E2F1,EEF1A1,EGR1,…	233
Cancer, Gastrointestinal Disease, Organismal Injury and Abnormalities	intestinal cancer	1.67e-10	A1BG,ABCB1,ABL2,ACTG1,ACTL6B,AGBL5,AGTR1,AHDC1,ALDH8A1,AMOT,ANGPTL6,ARHGAP5,ARMCX3,ASB11,ASH1L,ATAD2,ATF7IP,ATRNL1,BCL2L11,BCL9,BCL9L,BIVM,BRD7,C12orf42,C6orf223,CCAR1,CCDC140,CCDC66,CCDC73,CCPG1,CD58,CEL,CETN3,CFHR4,CLDN5,CLEC4M,CLOCK,CLSTN2,CNOT4,COL11A1,COL16A1,COL19A1,COL25A1,COL28A1,COL4A3,COL4A4,COL8A1,CPEB2,CRYBG3,CSMD3,CYP7B1,DARS,DCX,DDX17,DDX50,DMC1,DUSP16,DYRK1A,E2F1,EEF1A1,EGR1,EPHA5,…	232
Cancer, Organismal Injury and Abnormalities, Reproductive System Disease	female genital tract adenocarcinoma	1.69e-10	ABCB1,ABCB5,ACTG1,AGBL5,ALDH8A1,ASB11,ASH1L,ASPA,ATAD2,ATF7IP,C12orf42,CCAR1,CCDC140,CCDC73,CCDC82,CCPG1,CD300E,CETN3,CLDN5,CNOT4,COL11A1,COL19A1,COL28A1,COL4A4,CRYBG3,CSMD3,CX3CL1,DACH2,DDX50,DYRK1A,DYTN,EIF1AX,EPHA5,ESRP1,FAAH2,FAM122A,FAM83B,FAM98C,FFAR2,FOXJ3,GALNT7,GIGYF2,GPRASP1,GTPBP4,HIST1H2BI,INPP4A,IQCJ-SCHIP1,IQCK,JMJD1C,KDF1,KIF21A,LATS1,LCA5L,LDAH,LSM11,LUC7L2,MAEL,MAP3K13,MARCH11,MC…	126
Cancer, Organismal Injury and Abnormalities, Reproductive System Disease	endometrial carcinoma	2.13e-10	ABCB1,ABCB5,AGBL5,ALDH8A1,ASB11,ASH1L,ASPA,ATAD2,ATF7IP,C12orf42,CCAR1,CCDC140,CCDC73,CCDC82,CCPG1,CD300E,CETN3,COL19A1,COL28A1,CRYBG3,CSMD3,CX3CL1,DACH2,DDX50,DYRK1A,DYTN,EIF1AX,ESRP1,FAAH2,FAM122A,FAM83B,FAM98C,FOXJ3,GALNT7,GIGYF2,GPRASP1,INPP4A,IQCK,KDF1,KIF21A,LATS1,LDAH,LSM11,LUC7L2,MAEL,MARCH11,MCTP1,MMP2,MUC7,MYBL1,NAA15,NCKAP5L,NIPBL,NONO,OR2M3,OR4D5,OR51A4,OR5M3,OSBPL10,PCLO,PDXK,PDZRN4,…	102
Cancer, Gastrointestinal Disease, Organismal Injury and Abnormalities	large intestine neoplasm	5.21e-10	A1BG,ABCB1,ABL2,ACTG1,ACTL6B,AGBL5,AGTR1,AHDC1,ALDH8A1,AMOT,AMY2A,ANGPTL6,ARHGAP5,ARMCX3,ASB11,ASH1L,ATAD2,ATF7IP,ATRNL1,BCL2L11,BCL9,BCL9L,BIVM,BRD7,C12orf42,C6orf223,CCAR1,CCDC140,CCDC66,CCDC73,CCPG1,CD58,CEL,CETN3,CFHR4,CLDN5,CLEC4M,CLOCK,CLSTN2,CNOT4,COL11A1,COL16A1,COL19A1,COL25A1,COL28A1,COL4A3,COL4A4,COL8A1,CPEB2,CRYBG3,CSMD3,CYP7B1,DARS,DCX,DDX17,DDX50,DMC1,DUSP16,DYRK1A,E2F1,EEF1A1,EGR1,…	231
Cancer, Gastrointestinal Disease, Organismal Injury and Abnormalities	malignant neoplasm of large intestine	6.02e-10	A1BG,ABCB1,ABL2,ACTG1,ACTL6B,AGBL5,AGTR1,AHDC1,ALDH8A1,AMOT,ANGPTL6,ARHGAP5,ARMCX3,ASB11,ASH1L,ATAD2,ATF7IP,ATRNL1,BCL2L11,BCL9,BCL9L,BIVM,BRD7,C12orf42,C6orf223,CCAR1,CCDC140,CCDC66,CCDC73,CCPG1,CD58,CEL,CETN3,CFHR4,CLDN5,CLEC4M,CLOCK,CLSTN2,CNOT4,COL11A1,COL16A1,COL19A1,COL25A1,COL28A1,COL4A3,COL4A4,COL8A1,CPEB2,CRYBG3,CSMD3,CYP7B1,DARS,DCX,DDX17,DDX50,DMC1,DUSP16,DYRK1A,E2F1,EEF1A1,EGR1,EPHA5,…	230
Cancer, Gastrointestinal Disease, Organismal Injury and Abnormalities	gastro-esophageal carcinoma	2.11e-09	ABCB1,ABCB5,AMY2A,ASH1L,CCDC73,CCPG1,CFHR4,CLEC4M,CLOCK,CLSTN2,CNOT4,CNOT9,COL11A1,COL4A4,COL8A1,CSMD3,CYP7B1,DACH2,DCDC2,EPHA5,ESRP1,FAM171B,FFAR2,FNBP4,FOXJ3,FOXP1,GALNT7,GCC2,GPRASP1,GPRIN1,GRM1,HMGB2,IRF2,KLF3,KLF5,LARP4B,LDAH,LIN7A,LMAN1,MAPT,MARK2,MEX3D,MSRB3,MUC7,MYBL1,MYH9,NIPBL,NOSTRIN,NRIP1,OLAH,OR4A15,OR5M3,PCLO,PER3,PLEKHA5,POU4F1,RBBP6,REV3L,RIF1,RTKN2,RUNX1T1,SCAF4,SLC16A10,SMARCA2,…	76
Cancer, Organismal Injury and Abnormalities, Reproductive System Disease	uterine carcinoma	3.24e-09	ABCB1,ABCB5,AGBL5,ALDH8A1,ASB11,ASH1L,ASPA,ATAD2,ATF7IP,C12orf42,CCAR1,CCDC140,CCDC73,CCDC82,CCPG1,CD300E,CETN3,CLEC4M,COL19A1,COL28A1,CRYBG3,CSMD3,CX3CL1,DACH2,DDX50,DYRK1A,DYTN,EIF1AX,ESRP1,FAAH2,FAM122A,FAM83B,FAM98C,FOXJ3,GALNT7,GIGYF2,GPRASP1,INPP4A,IQCK,KDF1,KIF21A,LATS1,LDAH,LSM11,LUC7L2,MAEL,MARCH11,MCTP1,MMP2,MUC7,MYBL1,NAA15,NCKAP5L,NIPBL,NONO,OR2M3,OR4D5,OR51A4,OR5M3,OSBPL10,PCLO,PDXK,…	104
Cancer, Organismal Injury and Abnormalities, Reproductive System Disease	endometrial cancer	4.62e-09	ABCB1,ABCB5,AGBL5,ALDH8A1,ASB11,ASH1L,ASPA,ATAD2,ATF7IP,C12orf42,CCAR1,CCDC140,CCDC73,CCDC82,CCPG1,CD300E,CETN3,CLDN5,COL19A1,COL28A1,CRYBG3,CSMD3,CX3CL1,DACH2,DDX50,DYRK1A,DYTN,EIF1AX,ESRP1,FAAH2,FAM122A,FAM83B,FAM98C,FOXJ3,GALNT7,GIGYF2,GPRASP1,INPP4A,IQCK,KDF1,KIF21A,LATS1,LDAH,LSM11,LUC7L2,MAEL,MARCH11,MCTP1,MMP2,MUC7,MYBL1,NAA15,NCKAP5L,NIPBL,NONO,OR2M3,OR4D5,OR51A4,OR5M3,OSBPL10,PCLO,PDXK,P…	104
Cancer, Gastrointestinal Disease, Organismal Injury and Abnormalities	upper gastrointestinal tract cancer	5.16e-09	A1BG,ABCB1,ABCB5,AMY2A,ASH1L,ATRNL1,CCDC73,CCPG1,CFHR4,CLEC4M,CLOCK,CLSTN2,CNOT4,CNOT9,COL11A1,COL4A4,COL8A1,CSMD3,CYP7B1,DACH2,DCDC2,EPHA5,ESRP1,FAAH2,FAM171B,FFAR2,FNBP4,FOXJ3,FOXP1,GALNT7,GCC2,GPRASP1,GPRIN1,GRM1,HAX1,HMGB2,IL1RL1,IRF2,KLF3,KLF5,LARP4B,LDAH,LIN7A,LMAN1,MAPT,MARK2,MEX3D,MMP2,MSRB3,MUC7,MYBL1,MYH9,NIPBL,NOSTRIN,NRIP1,OLAH,OR4A15,OR5M3,PCLO,PER3,PLEKHA5,PNISR,POU4F1,RBBP6,RBP1,RE…	87
Cancer, Gastrointestinal Disease, Organismal Injury and Abnormalities	gastric carcinoma	1.21e-08	ABCB5,AMY2A,ASH1L,CCDC73,CCPG1,CLEC4M,CLOCK,CLSTN2,CNOT4,CNOT9,CSMD3,CYP7B1,DCDC2,EPHA5,ESRP1,FFAR2,FNBP4,FOXP1,GCC2,GPRASP1,GPRIN1,GRM1,HMGB2,IRF2,KLF3,LARP4B,LDAH,LIN7A,LMAN1,MARK2,MEX3D,MSRB3,MUC7,MYBL1,MYH9,NIPBL,NOSTRIN,NRIP1,OLAH,OR4A15,OR5M3,PCLO,PER3,PLEKHA5,POU4F1,REV3L,RIF1,RTKN2,RUNX1T1,SCAF4,SMARCA2,SMARCC2,SP3,STAU2,THRAP3,THSD7A,TNRC6C,TTK,TUSC3,UBQLN2,UPF2,UPF3A,ZNF862	63
Cancer, Gastrointestinal Disease, Organismal Injury and Abnormalities	gastroesophageal adenocarcinoma	2.22e-08	ABCB1,ABCB5,AMY2A,ASH1L,CCDC73,CCPG1,CFHR4,CLEC4M,CLOCK,CLSTN2,CNOT4,CNOT9,COL11A1,COL8A1,CSMD3,CYP7B1,DCDC2,EPHA5,ESRP1,FFAR2,FNBP4,FOXJ3,FOXP1,GCC2,GPRASP1,GPRIN1,GRM1,HMGB2,IRF2,KLF3,LARP4B,LDAH,LIN7A,LMAN1,MAPT,MARK2,MEX3D,MSRB3,MUC7,MYH9,NIPBL,NOSTRIN,OLAH,OR4A15,OR5M3,PCLO,PER3,PLEKHA5,POU4F1,RBBP6,REV3L,RIF1,RTKN2,RUNX1T1,SCAF4,SLC16A10,SMARCA2,SMARCC2,SP3,STAU2,THRAP3,THSD7A,TNRC6C,TTK,TU…	69
Cancer, Gastrointestinal Disease, Organismal Injury and Abnormalities	gastric adenocarcinoma	2.53e-08	ABCB5,AMY2A,ASH1L,CCDC73,CCPG1,CLEC4M,CLOCK,CLSTN2,CNOT4,CNOT9,CSMD3,CYP7B1,DCDC2,EPHA5,ESRP1,FFAR2,FNBP4,FOXP1,GCC2,GPRASP1,GPRIN1,GRM1,HMGB2,IRF2,KLF3,LARP4B,LDAH,LIN7A,LMAN1,MARK2,MEX3D,MSRB3,MUC7,MYH9,NIPBL,NOSTRIN,OLAH,OR4A15,OR5M3,PCLO,PER3,PLEKHA5,POU4F1,REV3L,RIF1,RTKN2,RUNX1T1,SCAF4,SMARCA2,SMARCC2,SP3,STAU2,THRAP3,THSD7A,TNRC6C,TTK,TUSC3,UBQLN2,UPF2,UPF3A,ZNF862	61
Cancer, Organismal Injury and Abnormalities, Reproductive System Disease	uterine tumor	2.96e-08	ABCB1,ABCB5,AGBL5,ALDH8A1,ASB11,ASH1L,ASPA,ATAD2,ATF7IP,ATRNL1,C12orf42,CCAR1,CCDC140,CCDC73,CCDC82,CCPG1,CD300E,CETN3,CLDN5,CLEC4M,COL19A1,COL28A1,CRYBG3,CSMD3,CX3CL1,DACH2,DCX,DDX50,DMC1,DYRK1A,DYTN,EIF1AX,ESRP1,FAAH2,FAM122A,FAM83B,FAM98C,FOXJ3,GALNT7,GIGYF2,GPRASP1,INPP4A,IQCK,KDF1,KIF21A,KLF3,LATS1,LDAH,LSM11,LUC7L2,MAEL,MARCH11,MCTP1,MEX3D,MMP2,MUC7,MYBL1,NAA15,NCKAP5L,NIPBL,NONO,OR2M3,OR4D…	112
Cancer, Organismal Injury and Abnormalities, Reproductive System Disease	uterine cancer	2.96e-08	ABCB1,ABCB5,AGBL5,ALDH8A1,ASB11,ASH1L,ASPA,ATAD2,ATF7IP,C12orf42,CCAR1,CCDC140,CCDC73,CCDC82,CCPG1,CD300E,CETN3,CLDN5,CLEC4M,COL19A1,COL28A1,CRYBG3,CSMD3,CX3CL1,DACH2,DDX50,DMC1,DYRK1A,DYTN,EIF1AX,ESRP1,FAAH2,FAM122A,FAM83B,FAM98C,FOXJ3,GALNT7,GIGYF2,GPRASP1,INPP4A,IQCK,KDF1,KIF21A,KLF3,LATS1,LDAH,LSM11,LUC7L2,MAEL,MARCH11,MCTP1,MMP2,MUC7,MYBL1,NAA15,NCKAP5L,NIPBL,NONO,OR2M3,OR4D5,OR51A4,OR5M3,OS…	108
Cancer, Gastrointestinal Disease, Organismal Injury and Abnormalities	gastroesophageal cancer	3.02e-08	ABCB1,ABCB5,AMY2A,ASH1L,CCDC73,CCPG1,CFHR4,CLEC4M,CLOCK,CLSTN2,CNOT4,CNOT9,COL11A1,COL4A4,COL8A1,CSMD3,CYP7B1,DACH2,DCDC2,EPHA5,ESRP1,FAM171B,FFAR2,FNBP4,FOXJ3,FOXP1,GALNT7,GCC2,GPRASP1,GPRIN1,GRM1,HMGB2,IRF2,KLF3,KLF5,LARP4B,LDAH,LIN7A,LMAN1,MAPT,MARK2,MEX3D,MSRB3,MUC7,MYBL1,MYH9,NIPBL,NOSTRIN,NRIP1,OLAH,OR4A15,OR5M3,PCLO,PER3,PLEKHA5,POU4F1,RBBP6,RBP1,REV3L,RIF1,RTKN2,RUNX1T1,SCAF4,SLC16A10,SMA…	77
Gastrointestinal Disease, Organismal Injury and Abnormalities	gastric lesion	1.92e-07	ABCB1,ABCB5,AMY2A,ASH1L,CCDC73,CCPG1,CLEC4M,CLOCK,CLSTN2,CNOT4,CNOT9,CSMD3,CYP7B1,DCDC2,EPHA5,ESRP1,FFAR2,FNBP4,FOXP1,GCC2,GPRASP1,GPRIN1,GRM1,HMGB2,IRF2,KLF3,LARP4B,LDAH,LIN7A,LMAN1,MARK2,MEX3D,MMP2,MSRB3,MUC7,MYBL1,MYH9,NIPBL,NOSTRIN,NRIP1,OLAH,OR4A15,OR5M3,PCLO,PER3,PLEKHA5,POU4F1,REV3L,RIF1,RTKN2,RUNX1T1,SCAF4,SMARCA2,SMARCC2,SP3,STAU2,THRAP3,THSD7A,TNRC6C,TTK,TUSC3,UBQLN2,UPF2,UPF3A,ZNF862	65
Cancer, Gastrointestinal Disease, Organismal Injury and Abnormalities	gastric cancer	2.47e-07	ABCB1,ABCB5,AMY2A,ASH1L,CCDC73,CCPG1,CLEC4M,CLOCK,CLSTN2,CNOT4,CNOT9,CSMD3,CYP7B1,DCDC2,EPHA5,ESRP1,FFAR2,FNBP4,FOXP1,GCC2,GPRASP1,GPRIN1,GRM1,HMGB2,IRF2,KLF3,LARP4B,LDAH,LIN7A,LMAN1,MARK2,MEX3D,MSRB3,MUC7,MYBL1,MYH9,NIPBL,NOSTRIN,NRIP1,OLAH,OR4A15,OR5M3,PCLO,PER3,PLEKHA5,POU4F1,REV3L,RIF1,RTKN2,RUNX1T1,SCAF4,SMARCA2,SMARCC2,SP3,STAU2,THRAP3,THSD7A,TNRC6C,TTK,TUSC3,UBQLN2,UPF2,UPF3A,ZNF862	64
Cancer, Organismal Injury and Abnormalities	breast or ovarian carcinoma	5.75e-06	ABL2,ACTG1,ACTL6B,AHDC1,AMOT,ASH1L,ATAD2,CCDC82,CEL,CLSTN2,CNOT4,COL11A1,COL28A1,COL4A4,COL8A1,CSMD3,DACH1,DUSP16,DYRK1A,EGR1,EPHA5,FAM83B,FAM98C,FFAR2,GTPBP4,HAX1,HIST1H2BI,HOXB9,HRCT1,IFNGR1,IL1RL1,IQCJ-SCHIP1,JMJD1C,LATS1,LCA5L,LMAN1,MAP3K13,MARK2,MCTP1,MMP2,MSRB3,MSX2,MUC7,MYH9,NCKAP5L,NIPBL,NPTXR,NTM,NTS,OR2T2/OR2T35,PCLO,PDE10A,PDZRN4,PGR,POU4F1,PRSS58,PSIP1,RBBP6,REV3L,RGL2,RLF,RUNX1T1,SCA…	79
Gene Expression	transcription of DNA	7.73e-06	ARMCX3,ASH1L,ATAD2,ATF7IP,BCL9,BCL9L,BRD7,CCPG1,CLOCK,CUL3,DACH1,DDX17,E2F1,EGR1,FOXP1,HAX1,HMGB2,HOXB7,HOXB9,IRF2,IRF3,JMJD1C,KLF5,LMX1B,MAEL,MDFIC,MEPCE,MKL1,MSX2,MYBL1,NAA15,NIPBL,NONO,NOSTRIN,NR1D2,NRIP1,PCGF2,PER3,PGR,POU4F1,RBAK,RIF1,RLF,RUNX1T1,RUNX2,SIX5,SLC40A1,SMARCA1,SMARCA2,SMARCC2,SP3,SP4,STAT2,TAF4,TCF12,TFDP1,TGIF1,THRAP3,TLE1,TROVE2,TSC22D1,ZBTB20	62
Cancer, Dermatological Diseases and Conditions, Organismal Injury and Abnormalities	basal cell carcinoma	1.1e-05	ABCB1,ABCB5,AGTR1,ARMCX3,C12orf42,COL19A1,COL28A1,COL4A4,CSMD3,CYP7B1,EPHA5,IL1RL1,IRF2,LATS1,LIN7A,MAPT,MYH9,NRIP1,OR2T2/OR2T35,OR4A15,OR4N2,PCLO,PDE10A,PLCL1,RBM46,REV3L,RUNX1T1,SLC27A5,STAU2,VPS13C,VWA8,ZFX,ZNF233	33
Gene Expression	activation of DNA endogenous promoter	2.94e-05	ARMCX3,ASH1L,ATF7IP,BCL9,BCL9L,BRD7,CCPG1,CLOCK,CUL3,DACH1,DDX17,E2F1,EGR1,HAX1,HMGB2,HOXB7,HOXB9,IRF2,IRF3,KLF5,LMX1B,MAEL,MEPCE,MKL1,MSX2,MYBL1,NIPBL,NRIP1,PCGF2,PER3,PGR,POU4F1,RIF1,RLF,RUNX2,SIX5,SLC40A1,SMARCA2,SMARCC2,SP3,SP4,STAT2,TAF4,TCF12,TFDP1,TGIF1,THRAP3,TLE1,TROVE2,TSC22D1,ZBTB20	51
Gene Expression	repression of RNA	4.6e-05	CNOT9,CUL3,DACH1,E2F1,HMGB2,KLF3,NR1D2,NRIP1,PGR,RUNX1T1,RUNX2,SMARCA2,TGIF1,TLE1,TSC22D1	15
Cancer, Organismal Injury and Abnormalities	connective tissue tumor	4.83e-05	ABCB1,ATF7IP,CCAR1,CEL,COL11A1,COL16A1,COL19A1,COL25A1,COL4A3,COL4A4,COL8A1,CPEB2,DCX,DDX50,E2F1,EGR1,HRCT1,HS6ST1,IFNGR1,KLF3,KLF5,LATS1,LNP1,MEX3D,MKL1,MMP2,MYH9,NCKAP5L,PGR,PLEKHA6,RB1CC1,RUNX1T1,RUNX2,SIX5,SMARCA2,TFDP1,THBS3,TTK,UPF3A,ZMYM3,ZNF814	41
Cancer, Organismal Injury and Abnormalities	connective or soft tissue tumor	5.05e-05	ABCB1,ABL2,ATF7IP,ATRNL1,CCAR1,CEL,CETN3,COL11A1,COL16A1,COL19A1,COL25A1,COL4A3,COL4A4,COL8A1,CPEB2,DCX,DDX50,E2F1,EGR1,GNAI2,HRCT1,HS6ST1,IFNGR1,KLF3,KLF5,LATS1,LNP1,MEX3D,MKL1,MMP2,MYBL1,MYH9,NCKAP5L,PGR,PLEKHA6,PPIG,PSIP1,RB1CC1,RUNX1T1,RUNX2,SIX5,SMARCA2,TFDP1,THBS3,TTK,UPF3A,ZMYM3,ZNF814	48
Cancer, Organismal Injury and Abnormalities, Reproductive System Disease	Peyronie disease	8.23e-05	COL11A1,COL16A1,COL19A1,COL25A1,COL4A3,COL4A4,COL8A1	7
Connective Tissue Disorders, Organismal Injury and Abnormalities	advanced Dupuytren contracture	8.23e-05	COL11A1,COL16A1,COL19A1,COL25A1,COL4A3,COL4A4,COL8A1	7
Cancer, Organismal Injury and Abnormalities, Reproductive System Disease	breast or ovarian cancer	0.000101	A1BG,ABCB1,ABL2,ACTG1,ACTL6B,AHDC1,AMOT,APOH,ASH1L,ATAD2,BCL2L11,CCDC82,CEL,CLSTN2,CNOT4,COL11A1,COL28A1,COL4A4,COL8A1,CPEB2,CSMD3,DACH1,DDX17,DUSP16,DYRK1A,E2F1,EGR1,EPHA5,FAM83B,FAM98C,FFAR2,GTPBP4,HAX1,HIST1H2BI,HNRNPUL1,HOXB9,HRCT1,IFNGR1,IL1RL1,IQCJ-SCHIP1,JMJD1C,KLF3,LATS1,LCA5L,LGALS2,LMAN1,MAP3K13,MARK2,MCTP1,MMP2,MSRB3,MSX2,MUC7,MYH9,NCKAP5L,NIPBL,NPTXR,NRIP1,NTM,NTS,OR2T2/OR2T35,PCGF2,P…	93
Cancer, Organismal Injury and Abnormalities	fibromatosis	0.000153	COL11A1,COL16A1,COL19A1,COL25A1,COL4A3,COL4A4,COL8A1,E2F1,EGR1,PGR,TFDP1	11
Gene Expression	transcription of RNA	0.00025	ARMCX3,ASH1L,ATAD2,ATF7IP,BCL9,BCL9L,BRD7,CCPG1,CLOCK,CUL3,DACH1,DCX,DDX17,DYRK1A,E2F1,EGR1,FOXP1,HAX1,HMGB2,HOXB7,HOXB9,IRF2,IRF3,JMJD1C,KLF5,LMX1B,MAEL,MDFIC,MEPCE,MKL1,MSX2,MYBL1,NAA15,NIPBL,NONO,NOSTRIN,NR1D2,NRIP1,PCGF2,PER3,PGR,POU4F1,RB1CC1,RBAK,RBBP6,RIF1,RLF,RUNX1T1,RUNX2,SIX5,SLC40A1,SMARCA1,SMARCA2,SMARCC2,SP3,SP4,STAT2,TAF4,TCF12,TFDP1,TGIF1,THRAP3,TLE1,TROVE2,TSC22D1,ZBTB20	66
Endocrine System Disorders, Gastrointestinal Disease, Metabolic Disease, Organismal Injury and Abnormalities, Skeletal and Muscular Disorders	diabetic foot ulcer disorder	0.000336	COL11A1,COL16A1,COL19A1,COL25A1,COL4A3,COL4A4,COL8A1	7
Cancer, Organismal Injury and Abnormalities, Reproductive System Disease	prostatic adenocarcinoma	0.000637	ABCB5,ABL2,ARHGAP5,ASH1L,ATAD2,ATF7IP,ATRNL1,BCL2L11,BCL9,BCL9L,CEL,CLSTN2,CNOT4,CNOT9,COL11A1,COL19A1,COL28A1,COL8A1,CSMD3,CUL3,DARS,DDX17,DMC1,EIF1AX,EPHA5,FBXL17,FGF6,FOXJ3,GNAI2,GOLIM4,GRM1,HNRNPUL1,IFNGR1,IL1RL1,INPP4A,IRF2,IRF3,JMJD1C,KIAA1468,KIF21A,LDAH,LMAN1,LOC100996763/NOTCH2NL,LSM11,MAP3K13,MCTP1,MEX3D,MMP2,MYH9,NCKAP5L,NIPBL,NPTXR,NRIP1,OR4N2,PCLO,PDE10A,PDZRN4,PGR,PLEKHA5,PRSS58,RBA…	93
Connective Tissue Disorders, Organismal Injury and Abnormalities	Dupuytren contracture	0.000763	COL11A1,COL16A1,COL19A1,COL25A1,COL4A3,COL4A4,COL8A1,MMP2	8
Cancer, Gastrointestinal Disease, Organismal Injury and Abnormalities	oral tumor	0.000882	ANGPTL6,ARHGAP5,ATRNL1,BCL9,CCAR1,CCDC73,CNOT4,COL11A1,CSMD3,CYP7B1,DACH2,DYRK1A,ESRP1,FAM171B,GALNTL5,GIGYF2,GPRIN1,HAX1,HOXB9,JPH1,KIAA0907,KIF21A,MARCH11,MARK2,MEX3C,OR2T2/OR2T35,PDE10A,POU4F1,PURG,RBAK,RBBP6,REV3L,RUNX1T1,RUNX2,SCAF4,SIX5,SMARCA2,SP3,SP4,TEP1,TGIF1,TNRC6B,VWA8,WNK3,ZBTB20,ZNF211	46
Cancer, Organismal Injury and Abnormalities	head and neck neoplasia	0.00139	A1BG,ABL2,AGTR1,AMOT,ANGPTL6,ARHGAP5,ATRNL1,BCL2L11,BCL9,BMF,CCAR1,CCDC66,CCDC73,CEL,CNOT4,COL11A1,COL19A1,COL4A3,COL4A4,CSMD3,CYP7B1,DACH2,DYRK1A,E2F1,EGR1,EIF1AX,EPHA5,ESRP1,FAAH2,FAM171B,FAM83B,FBXL17,FNBP4,FOXP1,GALNTL5,GCC2,GIGYF2,GPRIN1,HAX1,HMGB2,HOXB9,HRCT1,HS6ST1,JMJD1C,JPH1,KIAA0907,KIF21A,KLF3,KLF5,LATS1,MARCH11,MARK2,MEX3C,MMP2,MSRB3,MUC7,NR1D2,NRIP1,OR13D1,OR2T2/OR2T35,OR4N2,PCLO,PDE…	98
Cancer, Organismal Injury and Abnormalities, Reproductive System Disease	breast carcinoma	0.00149	ABL2,ACTL6B,AHDC1,AMOT,CCDC82,CEL,CLSTN2,COL11A1,COL8A1,CSMD3,DACH1,DUSP16,DYRK1A,EGR1,FAM98C,GTPBP4,HAX1,HOXB9,HRCT1,IL1RL1,LMAN1,MARK2,MMP2,MUC7,MYH9,NIPBL,NTS,OR2T2/OR2T35,PDZRN4,PGR,POU4F1,PSIP1,RBBP6,REV3L,RGL2,RLF,SLC40A1,SMTN,SP3,STAU2,WNK3,ZMYM3	42
Cellular Compromise, Endocrine System Disorders, Organ Morphology, Organismal Injury and Abnormalities, Reproductive System Disease	atrophy of testicular cells	0.00168	E2F1,EGR1,TFDP1	3
Cancer, Gastrointestinal Disease, Organismal Injury and Abnormalities	intestinal gastric adenocarcinoma	0.00194	ASH1L,CCDC73,CLOCK,ESRP1,HMGB2,LARP4B,LMAN1,MUC7,NOSTRIN,OLAH,RTKN2,SCAF4,TNRC6C,TTK,UBQLN2,UPF3A	16
Cancer, Organismal Injury and Abnormalities	mesenchymal tumor	0.00206	ABCB1,COL11A1,COL16A1,COL19A1,COL25A1,COL4A3,COL4A4,COL8A1,E2F1,EGR1,PGR,TFDP1	12
Cancer, Organismal Injury and Abnormalities, Reproductive System Disease	prostatic carcinoma	0.0021	ABCB5,ABL2,ARHGAP5,ASH1L,ATAD2,ATF7IP,ATRNL1,BCL2L11,BCL9,BCL9L,CEL,CLSTN2,CNOT4,CNOT9,COL11A1,COL19A1,COL28A1,COL8A1,CSMD3,CUL3,DARS,DDX17,DMC1,EIF1AX,EPHA5,ESRP1,FBXL17,FGF6,FOXJ3,GNAI2,GOLIM4,GRM1,HNRNPUL1,IFNGR1,IL1RL1,INPP4A,IRF2,IRF3,JMJD1C,KIAA1468,KIF21A,LDAH,LMAN1,LOC100996763/NOTCH2NL,LSM11,MAP3K13,MCTP1,MEX3D,MMP2,MYH9,NCKAP5L,NIPBL,NPTXR,NRIP1,OR4N2,PCLO,PDE10A,PDZRN4,PGR,PLEKHA5,PRSS…	94
Cancer, Organismal Injury and Abnormalities, Reproductive System Disease	Prostate Cancer and Tumors	0.00215	ABCB5,ABL2,AGTR1,ARHGAP5,ASH1L,ATAD2,ATF7IP,ATRNL1,BCL2L11,BCL9,BCL9L,CEL,CLSTN2,CNOT4,CNOT9,COL11A1,COL19A1,COL28A1,COL8A1,CSMD3,CUL3,CX3CL1,DACH1,DARS,DDX17,DDX50,DMC1,E2F1,EGR1,EIF1AX,EPHA5,ESRP1,FBXL17,FGF6,FOXJ3,GNAI2,GOLIM4,GRM1,HEPACAM2,HNRNPUL1,IFNGR1,IL1RL1,INMT,INPP4A,IRF2,IRF3,JMJD1C,KIAA1468,KIF21A,LDAH,LMAN1,LOC100996763/NOTCH2NL,LSM11,MAP3K13,MAPT,MCTP1,MEX3D,MMP2,MYH9,NCKAP5L,NIPBL…	106
Gene Expression	expression of RNA	0.00234	ARMCX3,ASH1L,ATAD2,ATF7IP,BCL9,BCL9L,BRD7,CCPG1,CLOCK,CUL3,DACH1,DARS,DCX,DDX17,DYRK1A,E2F1,EGR1,FOXP1,GIGYF2,HAX1,HMGB2,HOXB7,HOXB9,IRF2,IRF3,JMJD1C,KLF5,LMX1B,MAEL,MDFIC,MEPCE,MKL1,MSX2,MYBL1,NAA15,NIPBL,NONO,NOSTRIN,NR1D2,NRIP1,PCGF2,PER3,PGR,POU4F1,RB1CC1,RBAK,RBBP6,REG1A,RGS16,RIF1,RLF,RUNX1T1,RUNX2,SIX5,SLC40A1,SMARCA1,SMARCA2,SMARCC2,SP3,SP4,STAT2,TAF4,TARBP2,TCF12,TEP1,TFDP1,TGIF1,THRAP3,…	72
Organismal Injury and Abnormalities	ulcer	0.00275	ABCB1,COL11A1,COL16A1,COL19A1,COL25A1,COL4A3,COL4A4,COL8A1,GNAI2,MMP2	10
Cancer, Organismal Injury and Abnormalities	tumorigenesis of adenocarcinoma	0.00277	ABCB1,ABCB5,ABL2,ACTG1,ARHGAP5,ASH1L,ATAD2,ATF7IP,ATRNL1,CCDC82,CNOT4,COL11A1,COL19A1,COL28A1,COL4A4,CPEB2,CSMD3,DDX17,E2F1,EPHA5,FAM83B,FFAR2,GPRIN1,GRM1,GTPBP4,HIST1H2BI,IQCJ-SCHIP1,JMJD1C,KIAA0907,KIF21A,KLF3,KLF5,LATS1,LCA5L,MAP3K13,MARK2,MCTP1,MMP2,MSRB3,MSX2,MYBL1,MYH9,NCKAP5L,NIPBL,NPTXR,NTM,NTS,OLAH,OR4N2,PCLO,PDE10A,PDXK,PGR,PNISR,PRSS58,PSIP1,PTPN14,REV3L,RUNX2,SCAF4,SMARCA2,SMARCC2,SMT…	81
Cancer, Organismal Injury and Abnormalities, Respiratory Disease	non-small cell lung cancer	0.00303	ABCB1,ABCB5,ABL2,ARHGAP5,ASH1L,ATF7IP,ATRNL1,BCL2L11,COL11A1,COL19A1,CPEB2,CSMD3,CUL3,CYP7B1,DDX17,E2F1,EEF1A1,EPHA5,FOXP1,GRM1,GTPBP4,HIST1H2BI,KIAA0907,KIF21A,KLF3,KLF5,LOC100996763/NOTCH2NL,MAP3K13,MARK2,MMP2,MYBL1,MYH9,NTM,NTS,OLAH,OR2T2/OR2T35,OR4N2,PPP2R2A,PRSS58,PTPN14,SCAF4,SMARCC2,TARBP2,THSD7A,TNRC6B,UBQLN2,UPF3A,ZNF814	48
Connective Tissue Disorders, Hereditary Disorder, Immunological Disease, Inflammatory Disease, Inflammatory Response, Organismal Injury and Abnormalities, Renal and Urological Disease	Alport syndrome	0.00303	COL4A3,COL4A4,MYH9	3
Cancer, Endocrine System Disorders, Organismal Injury and Abnormalities, Reproductive System Disease	adenosquamous ovarian carcinoma	0.00307	ACTG1,ASH1L,ATAD2,CNOT4,COL11A1,COL4A4,CSMD3,EPHA5,FAM83B,FFAR2,IQCJ-SCHIP1,JMJD1C,LATS1,LCA5L,MAP3K13,MCTP1,MSRB3,MSX2,MYH9,NCKAP5L,NPTXR,NTM,PCLO,PDE10A,PRSS58,PSIP1,SCAF4,SMARCA2,SMTN,STAU2,TBC1D4,TFDP1,TNNT2,TNRC6B,UBQLN2,VPS13C	36
Cancer, Organismal Injury and Abnormalities, Respiratory Disease	carcinoma in lung	0.00379	ABCB1,ABCB5,ABL2,ARHGAP5,ASH1L,ATF7IP,ATRNL1,BCL2L11,COL11A1,COL19A1,CPEB2,CSMD3,CUL3,CYP7B1,DDX17,E2F1,EEF1A1,EPHA5,FOXP1,GRM1,GTPBP4,HIST1H2BI,HRCT1,KIAA0907,KIF21A,KLF3,KLF5,LOC100996763/NOTCH2NL,MAP3K13,MARK2,MMP2,MYBL1,MYH9,NTM,NTS,OLAH,OR2T2/OR2T35,OR4N2,PPP2R2A,PRSS58,PTPN14,RUNX1T1,SCAF4,SMARCC2,TARBP2,THSD7A,TNRC6B,UBQLN2,UPF3A,ZNF814	50
Cancer, Dermatological Diseases and Conditions, Organismal Injury and Abnormalities	skin carcinoma	0.00385	ABCB1,ABCB5,AGTR1,ARMCX3,BCL9L,C12orf42,CFHR4,COL11A1,COL19A1,COL28A1,COL4A4,CSMD3,CYP7B1,DACH2,EPHA5,ESRP1,HTR1E,IL1RL1,IRF2,LATS1,LIN7A,MAPT,MARK2,MUC7,MYH9,NCKAP5L,NRIP1,OR2T2/OR2T35,OR2T3/OR2T34,OR4A15,OR4D5,OR4N2,PCLO,PDE10A,PDZRN4,PLCL1,RBM46,REV3L,RGS22,RUNX1T1,SLC27A5,STAU2,THSD7A,VPS13C,VWA8,ZFX,ZNF233	47
Cancer, Organismal Injury and Abnormalities	cancer of secretory structure	0.0041	ABCB5,ABL2,ADH4,AGBL5,AGTR1,AMOT,ARHGAP5,ASH1L,ATAD2,ATF7IP,ATRNL1,BCL2L11,BCL9,BCL9L,CCDC66,CEL,CLSTN2,CNOT4,CNOT9,COL11A1,COL19A1,COL25A1,COL28A1,COL8A1,CSMD3,CUL3,CX3CL1,DACH1,DARS,DDX17,DDX50,DENND6A,DMC1,DUSP16,E2F1,EGR1,EIF1AX,EPHA5,ESRP1,FAM83B,FBXL17,FGF6,FOXJ3,FOXP1,GNAI2,GOLIM4,GPRASP1,GRM1,HEPACAM2,HNRNPUL1,HRCT1,IFNGR1,IL1RL1,INMT,INPP4A,IRF2,IRF3,JMJD1C,KDF1,KIAA1468,KIF21A,KLF3,LATS…	137
Cancer, Organismal Injury and Abnormalities, Reproductive System Disease	prostate cancer	0.00422	ABCB5,ABL2,AGTR1,ARHGAP5,ASH1L,ATAD2,ATF7IP,ATRNL1,BCL2L11,BCL9,BCL9L,CEL,CLSTN2,CNOT4,CNOT9,COL11A1,COL19A1,COL28A1,COL8A1,CSMD3,CUL3,CX3CL1,DACH1,DARS,DDX17,DDX50,DMC1,E2F1,EIF1AX,EPHA5,ESRP1,FBXL17,FGF6,FOXJ3,GNAI2,GOLIM4,GRM1,HEPACAM2,HNRNPUL1,IFNGR1,IL1RL1,INMT,INPP4A,IRF2,IRF3,JMJD1C,KIAA1468,KIF21A,LDAH,LMAN1,LOC100996763/NOTCH2NL,LSM11,MAP3K13,MAPT,MCTP1,MEX3D,MMP2,MYH9,NCKAP5L,NIPBL,NPTX…	104
Gene Expression	transcription	0.00448	ARMCX3,ASH1L,ATAD2,ATF7IP,BCL9,BCL9L,BRD7,CCPG1,CLOCK,CUL3,DACH1,DCX,DDX17,DYRK1A,E2F1,EGR1,FOXP1,HAX1,HMGB2,HOXB7,HOXB9,IRF2,IRF3,JMJD1C,KLF5,LMX1B,MAEL,MDFIC,MEPCE,MKL1,MSX2,MYBL1,NAA15,NIPBL,NONO,NOSTRIN,NR1D2,NRIP1,PCGF2,PER3,PGR,POU4F1,RB1CC1,RBAK,RBBP6,REG1A,RIF1,RLF,RUNX1T1,RUNX2,SIX5,SLC40A1,SMARCA1,SMARCA2,SMARCC2,SP3,SP4,STAT2,TAF4,TCF12,TFDP1,TGIF1,THRAP3,TLE1,TROVE2,TSC22D1,ZBTB20	67
Cancer, Endocrine System Disorders, Organismal Injury and Abnormalities, Reproductive System Disease	Ovarian Cancer and Tumors	0.00562	A1BG,ABCB1,ACTG1,APOH,ASH1L,ATAD2,BCL2L11,CNOT4,COL11A1,COL28A1,COL4A4,CSMD3,DACH1,E2F1,EPHA5,FAM83B,FFAR2,GNAI2,GTPBP4,HIST1H2BI,IFNGR1,IQCJ-SCHIP1,JMJD1C,LATS1,LCA5L,MAP3K13,MCTP1,MMP2,MSRB3,MSX2,MYH9,NCKAP5L,NPTXR,NTM,PCLO,PDE10A,PGR,PRSS58,PSIP1,RUNX1T1,SCAF4,SMARCA2,SMTN,STAT2,STAU2,TBC1D4,TFDP1,THBS3,TNNT2,TNRC6B,TUSC3,UBQLN2,VPS13C,ZNF668	54
Cell Morphology, Organismal Injury and Abnormalities, Tissue Morphology	abnormal morphology of basement membrane	0.00585	BCL2L11,COL4A3,COL8A1,LMX1B,NPHS2	5
Humoral Immune Response, Protein Synthesis	quantity of immunoglobulin	0.00615	ABCB1,BCL2L11,BMF,CLEC4M,CYP7B1,GNAI2,HAX1,IFNGR1,IL1RL1,IRF2,LGALS2,MARK2,MYBL1,REG3G,TIMD4,TROVE2	16
Organismal Survival	organismal death	0.00721	ABCB1,ABL2,ACTG1,ACTL6B,ADH4,AGTR1,AMOT,ANGPTL6,APOH,ARHGAP5,ASPA,BCL2L11,BMF,CLDN5,CLEC4M,COL11A1,COL19A1,COL25A1,COL4A3,CPEB2,CUL3,CYP7B1,DACH1,DDX17,DYRK1A,E2F1,ESRP1,GNAI2,HAX1,HS6ST1,IFNGR1,IL1RL1,IRF2,IRF3,JPH1,KLF3,KLF5,LAMTOR2,LATS1,LGALS2,LIN7A,LMX1B,MAPT,MARK2,MKL1,MMP2,MYH9,NIPBL,NPHS2,PCGF2,PCLO,PGR,PLCL1,POU4F1,PPIG,PTPN12,RB1CC1,RBBP6,REV3L,RIF1,RUNX2,SLC40A1,SMARCC2,SMTN,SP4,STAT2,…	77
Cancer, Organismal Injury and Abnormalities, Respiratory Disease	lung adenocarcinoma	0.00744	ABCB5,ABL2,ASH1L,ATF7IP,ATRNL1,COL11A1,COL19A1,CPEB2,CSMD3,DDX17,E2F1,EPHA5,GRM1,GTPBP4,HIST1H2BI,KIAA0907,KLF5,MAP3K13,MARK2,MYBL1,MYH9,NTM,NTS,OLAH,OR4N2,PRSS58,PTPN14,SCAF4,SMARCC2,TARBP2,THSD7A,TNRC6B,UBQLN2,UPF3A,ZNF814	35
Cancer, Organismal Injury and Abnormalities	malignant connective or soft tissue neoplasm	0.00799	ABCB1,ATF7IP,CCAR1,CEL,CPEB2,DCX,DDX50,E2F1,EGR1,HRCT1,HS6ST1,IFNGR1,KLF3,KLF5,LATS1,LNP1,MEX3D,MKL1,MMP2,MYH9,NCKAP5L,PGR,PLEKHA6,RB1CC1,RUNX1T1,RUNX2,SIX5,SMARCA2,THBS3,TTK,UPF3A,ZMYM3,ZNF814	33
Cancer, Endocrine System Disorders, Organismal Injury and Abnormalities, Reproductive System Disease	gonadal tumor	0.00805	A1BG,ABCB1,ACTG1,APOH,ASH1L,ATAD2,BCL2L11,CNOT4,COL11A1,COL28A1,COL4A4,CSMD3,DACH1,E2F1,EPHA5,FAM83B,FFAR2,GNAI2,GTPBP4,HIST1H2BI,IFNGR1,IQCJ-SCHIP1,JMJD1C,LATS1,LCA5L,LDAH,MAP3K13,MCTP1,MMP2,MSRB3,MSX2,MYH9,NCKAP5L,NPTXR,NTM,PCLO,PDE10A,PGR,PRSS58,PSIP1,RUNX1T1,SCAF4,SMARCA2,SMTN,STAT2,STAU2,TBC1D4,TFDP1,THBS3,TNNT2,TNRC6B,TUSC3,UBQLN2,VPS13C,ZNF668	55
Cancer, Endocrine System Disorders, Organismal Injury and Abnormalities, Reproductive System Disease	ovarian cancer	0.00832	A1BG,ABCB1,ACTG1,APOH,ASH1L,ATAD2,BCL2L11,CNOT4,COL11A1,COL28A1,COL4A4,CSMD3,DACH1,E2F1,EPHA5,FAM83B,FFAR2,GTPBP4,HIST1H2BI,IFNGR1,IQCJ-SCHIP1,JMJD1C,LATS1,LCA5L,MAP3K13,MCTP1,MMP2,MSRB3,MSX2,MYH9,NCKAP5L,NPTXR,NTM,PCLO,PDE10A,PGR,PRSS58,PSIP1,RUNX1T1,SCAF4,SMARCA2,SMTN,STAT2,STAU2,TBC1D4,TFDP1,THBS3,TNNT2,TNRC6B,UBQLN2,VPS13C,ZNF668	52
Cancer, Organismal Injury and Abnormalities	thoracic cancer	0.00832	ABCB1,ABCB5,ABL2,ARHGAP5,ASH1L,ATAD2,ATF7IP,ATRNL1,BCL2L11,COL11A1,COL19A1,COL4A4,CPEB2,CSMD3,CUL3,CYP7B1,DDX17,E2F1,EEF1A1,EPHA5,FOXP1,GRM1,GTPBP4,HIST1H2BI,HRCT1,IL1RL1,KIAA0907,KIF21A,KLF3,KLF5,LOC100996763/NOTCH2NL,MAP3K13,MARK2,MMP2,MYBL1,MYH9,NTM,NTS,OLAH,OR2T2/OR2T35,OR4N2,PGR,PPP2R2A,PRSS58,PTPN14,RUNX1T1,SCAF4,SMARCC2,TARBP2,THSD7A,TNRC6B,UBQLN2,UPF3A,ZNF814	54
Hematological Disease, Immunological Disease, Organismal Injury and Abnormalities	B cell lymphadenopathy	0.00888	BCL2L11,BMF	2
Connective Tissue Disorders, Hereditary Disorder, Immunological Disease, Inflammatory Disease, Inflammatory Response, Organismal Injury and Abnormalities, Renal and Urological Disease	autosomal dominant Alport syndrome	0.00888	COL4A3,COL4A4	2
Connective Tissue Disorders, Hereditary Disorder, Immunological Disease, Inflammatory Disease, Inflammatory Response, Organismal Injury and Abnormalities, Renal and Urological Disease	autosomal recessive Alport syndrome	0.00888	COL4A3,COL4A4	2
Tissue Morphology	delay in initiation of remodeling of mammary epithelium	0.00888	BCL2L11,BMF	2
Cancer, Hematological Disease, Immunological Disease, Organismal Injury and Abnormalities	high grade diffuse large B-cell lymphoma	0.00888	BCL2L11,BMF	2
Cell-mediated Immune Response, Cellular Function and Maintenance, Hematological System Development and Function, Hematopoiesis	homeostasis of thymocytes	0.00888	BCL2L11,BMF	2
Nervous System Development and Function, Organ Morphology, Organismal Development	size of superior colliculus	0.00888	DYRK1A,LMX1B	2
Connective Tissue Disorders, Hereditary Disorder, Immunological Disease, Inflammatory Disease, Inflammatory Response, Organismal Injury and Abnormalities, Renal and Urological Disease	thin basement membrane disease	0.00888	COL4A3,COL4A4	2
Cancer, Organismal Injury and Abnormalities, Respiratory Disease	lung cancer	0.00991	ABCB1,ABCB5,ABL2,ARHGAP5,ASH1L,ATAD2,ATF7IP,ATRNL1,BCL2L11,COL11A1,COL19A1,CPEB2,CSMD3,CUL3,CYP7B1,DDX17,E2F1,EEF1A1,EPHA5,FOXP1,GRM1,GTPBP4,HIST1H2BI,HRCT1,IL1RL1,KIAA0907,KIF21A,KLF3,KLF5,LOC100996763/NOTCH2NL,MAP3K13,MARK2,MMP2,MYBL1,MYH9,NTM,NTS,OLAH,OR2T2/OR2T35,OR4N2,PGR,PPP2R2A,PRSS58,PTPN14,RUNX1T1,SCAF4,SMARCC2,TARBP2,THSD7A,TNRC6B,UBQLN2,UPF3A,ZNF814	53
Cancer, Organismal Injury and Abnormalities	sarcoma	0.00995	ABCB1,ATF7IP,CCAR1,CEL,CPEB2,DCX,DDX50,E2F1,EGR1,HRCT1,HS6ST1,KLF3,KLF5,LATS1,LNP1,MEX3D,MKL1,MMP2,MYH9,NCKAP5L,PGR,PLEKHA6,RB1CC1,RUNX1T1,RUNX2,SIX5,SMARCA2,THBS3,TTK,UPF3A,ZMYM3,ZNF814	32
Cancer, Endocrine System Disorders, Organismal Injury and Abnormalities	endocrine gland tumor	0.0103	AGTR1,AMOT,BCL2L11,COL11A1,COL25A1,COL4A3,CSMD3,E2F1,EGR1,EIF1AX,FNBP4,FOXP1,GNAI2,HMGB2,HRCT1,KLF3,LATS1,LIN7A,MEX3C,MEX3D,MMP2,NCKAP5L,NRIP1,NTS,OR13D1,OR2T2/OR2T35,PCLO,PDZRN4,PGR,PSIP1,PTPN12,RUNX1T1,RUNX2,SP3,SP4,TEP1,THBS3,TROVE2,UPF3A,ZNF211,ZNF814	41
Connective Tissue Development and Function, Connective Tissue Disorders, Organ Morphology, Organismal Development, Organismal Injury and Abnormalities, Skeletal and Muscular Disorders, Skeletal and Muscular System Development and Function, Tissue Development	abnormal morphology of supraoccipital bone	0.0105	LMX1B,MSX2,PCGF2,RUNX2	4
Developmental Disorder	rasopathy	0.0111	BCL2L11,E2F1,EGR1,SOS2,TFDP1,TNNT2	6
Cancer, Organismal Injury and Abnormalities	thoracic neoplasm	0.0123	ABCB1,ABCB5,ABL2,ARHGAP5,ASH1L,ATAD2,ATF7IP,ATRNL1,BCL2L11,COL11A1,COL19A1,COL4A4,CPEB2,CSMD3,CUL3,CYP7B1,DDX17,E2F1,EEF1A1,EPHA5,FOXP1,GRM1,GTPBP4,HAX1,HIST1H2BI,HRCT1,IL1RL1,KIAA0907,KIF21A,KLF3,KLF5,LOC100996763/NOTCH2NL,MAP3K13,MARK2,MMP2,MYBL1,MYH9,NTM,NTS,OLAH,OR2T2/OR2T35,OR4N2,PGR,PPP2R2A,PRSS58,PTPN14,RUNX1T1,SCAF4,SMARCC2,TARBP2,THSD7A,TNRC6B,UBQLN2,UPF3A,ZNF814	55
Behavior	sexual behavior	0.013	ABL2,GRM1,LMX1B,MAPT,PGR,SP4	6
Organismal Development	abnormal size of head	0.0133	DYRK1A,E2F1,EGR1	3
Cancer, Organismal Injury and Abnormalities, Respiratory Disease	lung tumor	0.014	ABCB1,ABCB5,ABL2,ARHGAP5,ASH1L,ATAD2,ATF7IP,ATRNL1,BCL2L11,COL11A1,COL19A1,CPEB2,CSMD3,CUL3,CYP7B1,DDX17,E2F1,EEF1A1,EPHA5,FOXP1,GRM1,GTPBP4,HAX1,HIST1H2BI,HRCT1,IL1RL1,KIAA0907,KIF21A,KLF3,KLF5,LOC100996763/NOTCH2NL,MAP3K13,MARK2,MMP2,MYBL1,MYH9,NTM,NTS,OLAH,OR2T2/OR2T35,OR4N2,PGR,PPP2R2A,PRSS58,PTPN14,RUNX1T1,SCAF4,SMARCC2,TARBP2,THSD7A,TNRC6B,UBQLN2,UPF3A,ZNF814	54
Cancer, Organismal Injury and Abnormalities	benign connective or soft tissue neoplasm	0.0153	ATRNL1,CETN3,COL11A1,COL16A1,COL19A1,COL25A1,COL4A3,COL4A4,COL8A1,DCX,E2F1,EGR1,MEX3D,MMP2,MYBL1,PGR,PPIG,TFDP1	18
Cancer, Endocrine System Disorders, Organismal Injury and Abnormalities, Reproductive System Disease	malignant epithelial ovarian tumor	0.0154	ACTG1,ASH1L,ATAD2,CNOT4,COL11A1,COL28A1,COL4A4,CSMD3,EPHA5,FAM83B,FFAR2,GTPBP4,HIST1H2BI,IFNGR1,IQCJ-SCHIP1,JMJD1C,LATS1,LCA5L,MAP3K13,MCTP1,MMP2,MSRB3,MSX2,MYH9,NCKAP5L,NPTXR,NTM,PCLO,PDE10A,PGR,PRSS58,PSIP1,RUNX1T1,SCAF4,SMARCA2,SMTN,STAT2,STAU2,TBC1D4,TFDP1,THBS3,TNNT2,TNRC6B,UBQLN2,VPS13C,ZNF668	46
Cancer, Organismal Injury and Abnormalities	squamous-cell carcinoma	0.0159	A1BG,ABCB1,ABL2,AGTR1,ANGPTL6,ARHGAP5,ATRNL1,BCL9,BCL9L,CCAR1,CCDC66,CCDC73,CEL,CFHR4,CLEC4M,CNOT4,COL11A1,COL19A1,COL4A4,CSMD3,CUL3,CYP7B1,DACH2,DYRK1A,EGR1,ESRP1,FAAH2,FAM171B,FAM83B,FOXP1,GALNT7,GALNTL5,GCC2,GIGYF2,GPRIN1,HAX1,HOXB9,HRCT1,HTR1E,IL1RL1,IRF2,JMJD1C,JPH1,KIAA0907,KIF21A,KLF5,LIN7A,LOC100996763/NOTCH2NL,MARCH11,MARK2,MEX3C,MUC7,MYH9,NCKAP5L,NR1D2,OR2T2/OR2T35,OR2T3/OR2T34,OR4A15,O…	94
Cardiovascular Disease, Cardiovascular System Development and Function, Organ Morphology, Organismal Development, Organismal Injury and Abnormalities, Renal and Urological Disease, Renal and Urological System Development and Function, Tissue Morphology	abnormal morphology of glomerular capillary	0.0165	COL4A3,LMX1B,MARK2,NPHS2	4
Embryonic Development, Organ Development, Organ Morphology, Organismal Development, Organismal Injury and Abnormalities, Reproductive System Development and Function, Reproductive System Disease, Tissue Development, Tissue Morphology	abnormal morphology of mammary epithelium	0.0173	MKL1,MYBL1,PGR	3
Dermatological Diseases and Conditions, Organismal Injury and Abnormalities	burn	0.0175	COL11A1,COL16A1,COL19A1,COL25A1,COL4A3,COL4A4,COL8A1	7
Cellular Assembly and Organization, Cellular Function and Maintenance	growth of microtubules	0.0188	KIF21A,MAPT,MARK2,MYH9	4
Cancer, Organismal Injury and Abnormalities, Reproductive System Disease	mammary tumor	0.0192	ABCB1,ABL2,ACTL6B,AHDC1,AMOT,ATAD2,BCL2L11,CCDC82,CEL,CLSTN2,COL11A1,COL8A1,CPEB2,CSMD3,CX3CL1,DACH1,DDX17,DUSP16,DYRK1A,E2F1,EGR1,FAM98C,GTPBP4,HAX1,HNRNPUL1,HOXB9,HRCT1,IL1RL1,JMJD1C,KLF3,LGALS2,LMAN1,MARK2,MMP2,MUC7,MYH9,NIPBL,NRIP1,NTS,OR2T2/OR2T35,PCGF2,PDZRN4,PGR,POU4F1,PSIP1,RB1CC1,RBBP6,REV3L,RGL2,RLF,RUNX2,SLC40A1,SMTN,SP3,STAU2,TLE1,TNNT2,WNK3,ZBTB20,ZMYM3	60
Organismal Survival	viability	0.0207	DYRK1A,E2F1,GNAI2,MAPT,PTPN12,RUNX1T1,ZFX	7
Connective Tissue Development and Function, Skeletal and Muscular System Development and Function, Tissue Development	formation of trabecula	0.0218	MMP2,MSX2,THBS3	3
Connective Tissue Disorders, Dental Disease, Developmental Disorder, Gastrointestinal Disease, Hereditary Disorder, Organismal Injury and Abnormalities, Skeletal and Muscular Disorders	cleidocranial dysplasia	0.0218	MSX2,RUNX2	2
Drug Metabolism, Molecular Transport	efflux of mitoxantrone	0.0218	ABCB1,E2F1	2
Cell Cycle	exit from G2 phase	0.0218	E2F1,RUNX2	2
Cancer, Hematological Disease, Immunological Disease, Organismal Injury and Abnormalities	frequency of non-Hodgkin lymphoma	0.0218	BCL2L11,BMF	2
Organismal Injury and Abnormalities, Reproductive System Disease	hydrometrocolpos	0.0218	BCL2L11,BMF	2
Drug Metabolism, Lipid Metabolism, Molecular Transport, Small Molecule Biochemistry, Vitamin and Mineral Metabolism	quantity of alitretinoin	0.0218	ALDH8A1,RBP1	2
Cellular Assembly and Organization	translocation of Golgi vesicles	0.0218	MAPT,PCLO	2
Cardiovascular Disease, Cardiovascular System Development and Function, Organismal Injury and Abnormalities, Tissue Morphology	abnormal morphology of capillary vessel	0.022	AMOT,COL4A3,LMX1B,MARK2,NPHS2	5
Cancer, Organismal Injury and Abnormalities	neoplasia of cells	0.0226	A1BG,ABCB1,ABL2,AGTR1,ANGPTL6,ARHGAP5,ATRNL1,BCL2L11,BCL9,BCL9L,BMF,CCAR1,CCDC66,CCDC73,CD58,CEL,CFHR4,CLEC4M,CNOT4,COL11A1,COL19A1,COL4A4,CSMD3,CUL3,CYP7B1,DACH1,DACH2,DYRK1A,E2F1,EGR1,ESRP1,FAAH2,FAM171B,FAM83B,FOXP1,GALNT7,GALNTL5,GCC2,GIGYF2,GNAI2,GPRIN1,HAX1,HOXB9,HRCT1,HTR1E,IL1RL1,IRF2,JMJD1C,JPH1,KIAA0907,KIF21A,KLF5,LIN7A,LOC100996763/NOTCH2NL,MARCH11,MARK2,MEX3C,MMP2,MUC7,MYH9,NCKAP5L,N…	104
Humoral Immune Response, Protein Synthesis	quantity of IgG	0.0229	ABCB1,BCL2L11,CLEC4M,GNAI2,HAX1,IFNGR1,IRF2,LGALS2,MARK2,MYBL1,TIMD4,TROVE2	12
Cancer, Organismal Injury and Abnormalities, Reproductive System Disease	breast cancer	0.023	ABCB1,ABL2,ACTL6B,AHDC1,AMOT,ATAD2,BCL2L11,CCDC82,CEL,CLSTN2,COL11A1,COL8A1,CPEB2,CSMD3,DACH1,DDX17,DUSP16,DYRK1A,E2F1,EGR1,FAM98C,GTPBP4,HAX1,HNRNPUL1,HOXB9,HRCT1,IL1RL1,KLF3,LGALS2,LMAN1,MARK2,MMP2,MUC7,MYH9,NIPBL,NRIP1,NTS,OR2T2/OR2T35,PCGF2,PDZRN4,PGR,POU4F1,PSIP1,RB1CC1,RBBP6,REV3L,RGL2,RLF,SLC40A1,SMTN,SP3,STAU2,TNNT2,WNK3,ZBTB20,ZMYM3	56
Embryonic Development, Organ Development, Organismal Development, Reproductive System Development and Function, Tissue Development	development of internal genitalia	0.0246	ASH1L,BCL2L11,BMF,DMC1,EGR1,HMGB2,JMJD1C,LATS1,MMP2,NIPBL,PGR,TAF4,ZFX	13
Cell Cycle, Connective Tissue Development and Function	G1 phase of fibroblasts	0.0259	DYRK1A,E2F1,SMARCA2,TFDP1	4
Cell Morphology, Organ Morphology, Organismal Development, Organismal Injury and Abnormalities, Renal and Urological Disease, Renal and Urological System Development and Function	abnormal morphology of pedicels	0.0259	COL4A3,LMX1B,NPHS2	3
Organismal Development	size of body	0.0267	ABL2,ACTG1,AGTR1,ARHGAP5,ASPA,BCL2L11,BMF,CEP19,COL4A3,CPEB2,DYRK1A,E2F1,GNAI2,HAX1,HS6ST1,LATS1,MARK2,MEX3C,MKL1,MMP2,MYBL1,NIPBL,NPHS2,PCLO,PDE10A,RUNX2,SP4,TARBP2,TGIF1,TRAT1,ZBTB20,ZFX	32
Cancer, Organismal Injury and Abnormalities, Respiratory Disease	respiratory system tumor	0.027	A1BG,ABCB1,ABCB5,ABL2,ARHGAP5,ASH1L,ATAD2,ATF7IP,ATRNL1,BCL2L11,COL11A1,COL19A1,COL4A4,CPEB2,CSMD3,CUL3,CYP7B1,DDX17,E2F1,EEF1A1,EPHA5,FAAH2,FAM83B,FOXP1,GRM1,GTPBP4,HAX1,HIST1H2BI,HRCT1,IL1RL1,JMJD1C,KIAA0907,KIF21A,KLF3,KLF5,LOC100996763/NOTCH2NL,MAP3K13,MARK2,MMP2,MYBL1,MYH9,NTM,NTS,OLAH,OR2T2/OR2T35,OR4N2,PCLO,PGR,PPP2R2A,PRSS58,PTPN14,REG3G,RIF1,RUNX1T1,SCAF4,SMARCC2,TARBP2,THSD7A,TNRC6B,TYW…	64
Cancer, Organismal Injury and Abnormalities	cancer of cells	0.0271	A1BG,ABCB1,ABL2,AGTR1,ANGPTL6,ARHGAP5,ATRNL1,BCL2L11,BCL9,BCL9L,BMF,CCAR1,CCDC66,CCDC73,CD58,CEL,CFHR4,CLEC4M,CNOT4,COL11A1,COL19A1,COL4A4,CSMD3,CUL3,CYP7B1,DACH2,DYRK1A,E2F1,EGR1,ESRP1,FAAH2,FAM171B,FAM83B,FOXP1,GALNT7,GALNTL5,GCC2,GIGYF2,GPRIN1,HAX1,HOXB9,HRCT1,HTR1E,IL1RL1,IRF2,JMJD1C,JPH1,KIAA0907,KIF21A,KLF5,LIN7A,LOC100996763/NOTCH2NL,MARCH11,MARK2,MEX3C,MMP2,MUC7,MYH9,NCKAP5L,NR1D2,OR2T2/O…	101
Organismal Development, Reproductive System Development and Function	development of female reproductive tract	0.0296	ASH1L,BMF,DMC1,EGR1,LATS1,MMP2,NIPBL,PGR,TAF4,ZFX	10
Behavior, Reproductive System Development and Function	mating behavior	0.0297	ABL2,LMX1B,MAPT,PGR,SP4	5
Embryonic Development, Nervous System Development and Function, Ophthalmic Disease, Organ Development, Organ Morphology, Organismal Development, Organismal Injury and Abnormalities, Tissue Development, Visual System Development and Function	abnormal morphology of anterior chamber of eye	0.0312	COL8A1,EGR1,LMX1B	3
Organismal Development	epithelial-mesenchymal transformation	0.0312	ACTG1,MKL1,MMP2	3
Cancer, Endocrine System Disorders, Organismal Injury and Abnormalities, Reproductive System Disease	ovarian adenocarcinoma	0.0353	ACTG1,ASH1L,ATAD2,CNOT4,COL11A1,COL28A1,COL4A4,CSMD3,EPHA5,FAM83B,FFAR2,GTPBP4,HIST1H2BI,IQCJ-SCHIP1,JMJD1C,LATS1,LCA5L,MAP3K13,MCTP1,MSRB3,MSX2,MYH9,NCKAP5L,NPTXR,NTM,PCLO,PDE10A,PGR,PRSS58,PSIP1,SCAF4,SMARCA2,SMTN,STAT2,STAU2,TBC1D4,TFDP1,TNNT2,TNRC6B,UBQLN2,VPS13C,ZNF668	42
Cancer, Hematological Disease, Organismal Injury and Abnormalities	hematological neoplasia	0.0353	ABCB1,ABL2,ACTG1,ACTL6B,AGTR1,AMOT,ASH1L,ATRNL1,BCL2L11,BCL9L,BMF,BRD7,CCPG1,CD300E,CD58,CLDN5,COL16A1,COL25A1,COL4A3,COL4A4,CSMD3,CYP7B1,DENND6A,DYRK1A,DYTN,E2F1,EEF1A1,EGR1,FOXP1,GCC2,GPRASP1,GPRIN1,GRM1,IFNGR1,JMJD1C,KIF21A,KLF3,LAMTOR2,LATS1,LUC7L2,MKL1,MMP2,MSX2,MYH9,NONO,NOSTRIN,NPTXR,PCDHB10,PCLO,PER3,PGR,PPP2R2B,PPP4R1,PSIP1,PTPN14,REV3L,RGS16,RIF1,RLF,RUNX1T1,RUNX2,SMARCA1,SMARCA2,SMTN,S…	78
Cancer, Hematological Disease, Organismal Injury and Abnormalities	hematologic cancer	0.0354	ABCB1,ABL2,ACTG1,ACTL6B,AGTR1,AMOT,ASH1L,ATRNL1,BCL2L11,BCL9L,BMF,BRD7,CCPG1,CD300E,CD58,CLDN5,COL16A1,COL25A1,COL4A3,COL4A4,CSMD3,CYP7B1,DENND6A,DYRK1A,DYTN,E2F1,EEF1A1,EGR1,FOXP1,GCC2,GPRASP1,GPRIN1,GRM1,IFNGR1,JMJD1C,KIF21A,KLF3,LAMTOR2,LATS1,LUC7L2,MKL1,MMP2,MSX2,MYH9,NONO,NOSTRIN,NPTXR,PCDHB10,PCLO,PER3,PGR,PPP2R2B,PPP4R1,PSIP1,PTPN14,REV3L,RGS16,RIF1,RLF,RUNX1T1,RUNX2,SMARCA1,SMARCA2,SMTN,S…	77
Nervous System Development and Function, Organ Morphology, Organismal Development	abnormal size of brain	0.0377	DYRK1A,E2F1	2
Cell Death and Survival	apoptosis of transitional type 1 B lymphocytes	0.0377	BCL2L11,BMF	2
Developmental Disorder, Hereditary Disorder, Neurological Disease, Ophthalmic Disease, Organismal Injury and Abnormalities, Skeletal and Muscular Disorders	congenital fibrosis of extraocular muscles	0.0377	COL25A1,KIF21A	2
Cellular Compromise	degeneration of mitochondria	0.0377	MAPT,TNNT2	2
Neurological Disease, Organismal Injury and Abnormalities	demyelination of cerebellum	0.0377	ASPA,HPGDS	2
Cell Death and Survival	cell viability	0.0388	ABCB1,ABCB5,ABL2,BCL2L11,BRD7,CCAR1,CEL,CLOCK,COL4A3,CUL3,CX3CL1,DCDC2,DYRK1A,E2F1,EGR1,GRM1,GTPBP4,HMGB2,HNRNPUL1,INPP4A,JMJD1C,KLF5,LMX1B,MAPT,NPHS2,PCGF2,PGR,POU4F1,PPP2R2A,PPP2R2B,PPP4R1,PSIP1,RB1CC1,RBP1,REV3L,RUNX1T1,RUNX2,SLC40A1,SMARCA2,SMARCC2,STAT2,TTK,UBQLN2,UPF2,ZBTB20	45
Organismal Development	development of genitourinary system	0.0389	AGTR1,ARHGAP5,ASH1L,BCL2L11,BMF,CLOCK,COL4A3,COL4A4,CX3CL1,DMC1,E2F1,EGR1,GALNTL5,HMGB2,HOXB9,HS6ST1,JMJD1C,LATS1,LMX1B,MAEL,MKL1,MMP2,MSX2,MYBL1,NIPBL,PACRG,PGR,RUNX2,SIX5,SP3,TAF4,TARBP2,TBC1D4,TSC22D1,ZFX	35
Embryonic Development, Nervous System Development and Function, Organ Development, Organismal Development, Tissue Development, Visual System Development and Function	formation of eye	0.0393	ASPA,BCL2L11,BCL9,BCL9L,CCDC66,COL4A3,COL8A1,E2F1,EGR1,HS6ST1,LMX1B,MAPT,MMP2,MSX2,NIPBL,PSIP1,RBP1,STAU2,TLE1	19
Connective Tissue Development and Function, Skeletal and Muscular System Development and Function, Tissue Development	ossification of bone	0.0397	E2F1,HOXB9,MMP2,MSX2,NIPBL,PCGF2,PGR,RUNX2,THBS3	9
Cancer, Organismal Injury and Abnormalities	liquid tumor	0.0409	ABCB1,ABL2,ACTG1,ACTL6B,AMOT,ASH1L,ATRNL1,BCL2L11,BCL9L,BRD7,CCPG1,CD300E,CD58,CLDN5,COL16A1,COL25A1,COL4A3,COL4A4,CSMD3,CYP7B1,DYTN,E2F1,EEF1A1,EGR1,FOXP1,GCC2,GPRASP1,GRM1,KLF3,LAMTOR2,LATS1,LUC7L2,MKL1,MMP2,MSX2,MYH9,NOSTRIN,NPTXR,PCDHB10,PCLO,PER3,PGR,PPP2R2B,PPP4R1,PSIP1,REV3L,RIF1,RLF,RUNX1T1,RUNX2,SMTN,TCF12,TEP1,THRAP3,TIMD4,UBE2J2,UPF2	57
Cell Signaling, Post-Translational Modification	activation of MAP kinase kinase	0.0419	GNAI2,GRM1,LAMTOR2,MAP3K13	4
Cancer, Developmental Disorder, Gastrointestinal Disease, Hereditary Disorder, Organismal Injury and Abnormalities	hereditary gingival fibromatosis	0.043	E2F1,EGR1,TFDP1	3
Cell Death and Survival	cell survival	0.0435	ABCB1,ABCB5,ABL2,BCL2L11,BRD7,CCAR1,CEL,CLOCK,COL4A3,CUL3,CX3CL1,DCDC2,DYRK1A,E2F1,EGR1,FGF6,GRM1,GTPBP4,HMGB2,HNRNPUL1,IL1RL1,INPP4A,JMJD1C,KLF5,LMX1B,MAPT,NPHS2,PCGF2,PGR,POU4F1,PPP2R2A,PPP2R2B,PPP4R1,PSIP1,RB1CC1,RBP1,REV3L,RUNX1T1,RUNX2,SLC40A1,SMARCA2,SMARCC2,STAT2,TTK,UBQLN2,UPF2,ZBTB20	47
Humoral Immune Response, Protein Synthesis	quantity of IgG2a	0.0439	ABCB1,HAX1,IFNGR1,IRF2,MYBL1,TIMD4,TROVE2	7
Behavior, Digestive System Development and Function	feeding	0.0469	CLOCK,DACH1,GIGYF2,JPH1,KLF5,LMX1B,MARK2,MKL1,MYBL1,NTS,PDE10A,POU4F1,SLC27A5,USP46	14
Humoral Immune Response, Protein Synthesis	quantity of IgA	0.0476	ABCB1,BCL2L11,CYP7B1,GNAI2,REG3G,TIMD4	6
Hematological Disease, Immunological Disease	lymphoproliferative disorder	0.0504	ABCB1,ABL2,ACTG1,ACTL6B,AGTR1,AMOT,ASH1L,ATRNL1,BCL2L11,BCL9L,BMF,BRD7,CCPG1,CD300E,CD58,CLDN5,COL16A1,COL25A1,COL4A4,CYP7B1,DENND6A,DYRK1A,DYTN,E2F1,EEF1A1,EGR1,FOXP1,GCC2,GPRASP1,GPRIN1,GRM1,IFNGR1,JMJD1C,KIF21A,KLF3,LAMTOR2,LATS1,LUC7L2,MKL1,MMP2,MSX2,NOSTRIN,NPTXR,PCDHB10,PCLO,PER3,PGR,PPP2R2B,PPP4R1,PSIP1,PTPN14,REV3L,RGS16,RIF1,RLF,RUNX1T1,SMARCA1,SMTN,SOS2,SP4,STAT2,TARBP2,TEP1,THRAP3,TIMD…	70
Nervous System Development and Function	analgesia	0.0529	GNAI2,GPRASP1,GRM1,LMX1B,NTS,PGR	6
Cardiovascular Disease, Inflammatory Disease, Organismal Injury and Abnormalities	aortitis	0.0557	IFNGR1,MMP2	2
Cell Cycle, Gene Expression	binding of progesterone response element	0.0557	HMGB2,PGR	2
Cellular Assembly and Organization, Cellular Function and Maintenance	cross-linkage of microtubules	0.0557	ABL2,DCX	2
Cell Death and Survival, Cell-To-Cell Signaling and Interaction, Cellular Compromise, Neurological Disease, Tissue Morphology	degeneration of synapse	0.0557	MAPT,MARK2	2
Cellular Development, Organismal Development	epithelial-myofibroblast transition of carcinoma cell lines	0.0557	ACTG1,MKL1	2
Cellular Development, Organismal Development	epithelial-myofibroblast transition of lung cancer cell lines	0.0557	ACTG1,MKL1	2
Cell Morphology, Organ Morphology, Organismal Development, Organismal Injury and Abnormalities, Renal and Urological Disease, Renal and Urological System Development and Function	lack of podocyte slit diaphragm	0.0557	LMX1B,NPHS2	2
Cardiovascular Disease, Organismal Injury and Abnormalities	ischemia of heart	0.0566	AGTR1,AMY2A,MMP2,PDE10A,PGR,TNNT2	6
Organismal Injury and Abnormalities	fibrosis of interstitial tissue	0.0566	AGTR1,COL4A3,TNNT2	3
Nervous System Development and Function	sensory system development	0.0589	ABL2,ASPA,BCL2L11,BCL9,BCL9L,CCDC66,COL4A3,COL8A1,E2F1,EGR1,HS6ST1,LMX1B,MAPT,MMP2,MSX2,NIPBL,PSIP1,RBP1,STAU2,TLE1	20
Organismal Survival	survival of organism	0.0629	ABCB1,AGTR1,ASPA,BCL2L11,COL4A3,E2F1,ESRP1,GNAI2,IFNGR1,IL1RL1,IRF2,IRF3,KLF3,KLF5,MAPT,MMP2,PCLO,PGR,POU4F1,RB1CC1,RBBP6,RUNX2,SLC40A1,STAT2,TGIF1,TNNT2,ZBTB20	27
Cancer, Gastrointestinal Disease, Organismal Injury and Abnormalities	esophageal cancer	0.064	ABCB1,CFHR4,COL11A1,COL4A4,COL8A1,CSMD3,CYP7B1,DACH2,EPHA5,FAM171B,FOXJ3,FOXP1,GALNT7,IRF2,KLF5,MAPT,OR5M3,PCLO,RBBP6,RBP1,SLC16A10,SMARCC2	22
Cell Cycle, Connective Tissue Development and Function	arrest in G1 phase of fibroblasts	0.0652	E2F1,SMARCA2,TFDP1	3
Developmental Disorder	Growth Failure	0.0653	AMOT,DYRK1A,EGR1,GNAI2,HAX1,HS6ST1,LAMTOR2,LATS1,MARK2,MMP2,MSX2,MYBL1,PCGF2,PTPN12,RBBP6,RBP1,REV3L,SMTN,TCF12,TFDP1,TGIF1,TNNT2,ZBTB20	23
Cancer, Gastrointestinal Disease, Organismal Injury and Abnormalities	esophageal carcinoma	0.0667	ABCB1,CFHR4,COL11A1,COL4A4,COL8A1,CSMD3,CYP7B1,DACH2,EPHA5,FAM171B,FOXJ3,FOXP1,GALNT7,IRF2,KLF5,MAPT,OR5M3,PCLO,RBBP6,SLC16A10,SMARCC2	21
Cancer, Hematological Disease, Immunological Disease, Organismal Injury and Abnormalities	lymphoproliferative malignancy	0.0677	ABCB1,ABL2,ACTG1,ACTL6B,AGTR1,AMOT,ASH1L,ATRNL1,BCL2L11,BCL9L,BMF,BRD7,CCPG1,CD300E,CD58,CLDN5,COL16A1,COL25A1,COL4A4,CYP7B1,DENND6A,DYRK1A,DYTN,E2F1,EEF1A1,EGR1,FOXP1,GCC2,GPRASP1,GPRIN1,GRM1,IFNGR1,JMJD1C,KIF21A,KLF3,LAMTOR2,LATS1,LUC7L2,MKL1,MMP2,MSX2,NOSTRIN,NPTXR,PCDHB10,PCLO,PER3,PGR,PPP2R2B,PPP4R1,PSIP1,PTPN14,REV3L,RGS16,RIF1,RLF,RUNX1T1,SMARCA1,SMTN,SP4,STAT2,TARBP2,TEP1,THRAP3,TIMD4,TNR…	69
Cell Morphology, Organ Morphology, Organismal Development, Organismal Injury and Abnormalities, Renal and Urological Disease, Renal and Urological System Development and Function	abnormal morphology of podocytes	0.0677	COL4A3,LMX1B,MYH9,NPHS2	4
Embryonic Development, Organ Development, Organismal Development, Reproductive System Development and Function, Tissue Development	formation of uterus	0.0677	ASH1L,BMF,NIPBL,PGR	4
Organismal Development, Reproductive System Development and Function	development of reproductive system	0.069	ARHGAP5,ASH1L,BCL2L11,BMF,CLOCK,DMC1,EGR1,GALNTL5,HMGB2,HOXB9,HS6ST1,JMJD1C,LATS1,MAEL,MKL1,MMP2,MSX2,MYBL1,NIPBL,PACRG,PGR,RUNX2,SIX5,SP3,TAF4,TARBP2,ZFX	27
Behavior	behavior	0.0713	ABL2,ACTG1,AGTR1,BRD7,CLDN5,CLOCK,COL25A1,CYP7B1,DACH1,DCDC2,DYRK1A,E2F1,EGR1,GIGYF2,GNAI2,GPRASP1,GRM1,IFNGR1,JPH1,KLF5,LMX1B,MAPT,MARK2,MKL1,MYBL1,NTS,PDE10A,PER3,PGR,POU4F1,SLC27A5,SP4,UBQLN2,USP46,ZFX	35
Embryonic Development, Organismal Development	development of abdomen	0.0749	AGTR1,ASH1L,BCL2L11,BMF,COL4A3,COL4A4,CX3CL1,DMC1,EGR1,LATS1,LMX1B,MMP2,NIPBL,PGR,PTPN12,RB1CC1,SLC40A1,SP3,TAF4,TSC22D1,UPF2,ZFX	22
Cell Death and Survival	apoptosis of double-positive thymocyte	0.0749	BCL2L11,BMF	2
Cancer, Hematological Disease, Immunological Disease, Neurological Disease, Organismal Injury and Abnormalities	central nervous system leukemia	0.0749	CLDN5,MMP2	2
Skeletal and Muscular System Development and Function	force generation of muscle cells	0.0749	MKL1,TNNT2	2
Humoral Immune Response, Protein Synthesis	generation of antibody	0.0749	BCL2L11,REV3L	2
Embryonic Development, Organ Development, Organ Morphology, Organismal Development, Reproductive System Development and Function, Tissue Development	morphogenesis of uterus	0.0749	ASH1L,NIPBL	2
Organismal Development, Skeletal and Muscular System Development and Function	recovery of hindlimb	0.0749	MMP2,MYH9	2
Endocrine System Disorders, Organ Morphology, Organismal Development, Organismal Injury and Abnormalities, Reproductive System Development and Function, Reproductive System Disease	abnormal morphology of corpus luteum	0.0772	E2F1,EGR1,LATS1,PGR	4
Cancer, Gastrointestinal Disease, Organismal Injury and Abnormalities	pancreatobiliary tumor	0.0788	A1BG,ADH4,AGBL5,AMOT,ATRNL1,BCL2L11,BCL9,CCDC66,CCDC73,CEL,CFHR4,CLSTN2,COL19A1,COL25A1,COL4A3,COL4A4,COL8A1,CSMD3,DENND6A,DUSP16,DYRK1A,EGR1,EIF1AX,EPHA5,ESRP1,FAM83B,FGF6,GPRASP1,GRM1,IRF2,KDF1,KIF21A,KLF3,LARP4B,LIN7A,LMAN1,MAP3K13,MEX3D,MIS12,MMP2,MSX2,NCKAP5L,NIPBL,NOSTRIN,NTM,OR2T2/OR2T35,OR4A15,OR5M3,PCLO,PGR,PLCL1,PLEKHA6,PPP2R2A,PTPN12,RB1CC1,RBBP6,RIF1,RTKN2,RUNX1T1,SLC2A13,SMARCA2,SP3,…	77
Immunological Disease, Inflammatory Disease, Inflammatory Response, Organismal Injury and Abnormalities, Renal and Urological Disease	autoimmune glomerulonephritis	0.0794	AGTR1,BCL2L11,BMF,COL4A3,MARK2	5
Cellular Development, Cellular Growth and Proliferation	development of breast cell lines	0.0799	PGR,PTPN14,RUNX2	3
Organ Morphology, Organismal Development, Organismal Injury and Abnormalities, Renal and Urological Disease, Renal and Urological System Development and Function	formation of cast in kidney	0.0799	BCL2L11,COL4A3,NPHS2	3
Organismal Injury and Abnormalities	fibrosis of tissue	0.0807	AGTR1,COL4A3,CX3CL1,EGR1,RUNX2,TNNT2	6
Tissue Development	growth of epithelial tissue	0.0808	AGTR1,AMOT,ANGPTL6,APOH,COL4A3,COL8A1,CSMD3,CUL3,CYP7B1,DACH1,E2F1,EGR1,ESRP1,FGF6,HMGB2,HOXB7,IFNGR1,KDF1,KLF5,NTS,PGR,PTPN12,REG3G,RUNX2,THRAP3	25
Cancer, Endocrine System Disorders, Organismal Injury and Abnormalities	neuroendocrine tumor	0.0808	AGTR1,COL11A1,COL25A1,COL4A3,CSMD3,E2F1,EGR1,EIF1AX,HMGB2,HRCT1,LIN7A,MEX3D,NCKAP5L,NRIP1,NTS,OR2T2/OR2T35,PTPN12,RUNX1T1,SP3,SP4,TEP1,THBS3,TROVE2,ZNF211,ZNF814	25
Connective Tissue Development and Function, Connective Tissue Disorders, Organismal Development, Organismal Injury and Abnormalities, Skeletal and Muscular Disorders, Skeletal and Muscular System Development and Function, Tissue Development	abnormal morphology of skull vault	0.0808	LMX1B,MSX2,NIPBL,RUNX2	4
Cell Cycle	interphase of kidney cell lines	0.0808	E2F1,NRIP1,RBBP6,TFDP1	4
Cellular Development, Cellular Growth and Proliferation	cell proliferation of tumor cell lines	0.0859	ABCB1,ABCB5,ABL2,AGTR1,AMOT,ATAD2,BCL2L11,CEL,COL4A3,CX3CL1,DACH1,DCX,DDX17,E2F1,EEF1A1,EGR1,ESRP1,FBXL17,FGF6,FOXP1,GTPBP4,HOXB7,HOXB9,IRF2,KLF5,LATS1,MMP2,MSX2,MYBL1,NRIP1,NTS,PCGF2,PGR,POU4F1,PPP2R2B,PTPN14,RB1CC1,RBBP6,REG1A,RGL2,RGS16,RUNX1T1,RUNX2,SMARCA2,SPRR3,SPZ1,STAT2,TCF12,UBE2J2,ZBTB20,ZNF668	51
Cell Cycle	interphase of fibroblasts	0.0863	CUL3,DYRK1A,E2F1,SMARCA2,TFDP1	5
Organ Development, Organismal Injury and Abnormalities, Renal and Urological Disease, Renal and Urological System Development and Function	formation of glomerular crescent	0.0875	BCL2L11,COL4A3,NPHS2	3
Cancer, Organismal Injury and Abnormalities, Renal and Urological Disease	hyperplasia of kidney cells	0.0875	AGTR1,COL4A3,MARK2	3
Auditory Disease, Neurological Disease	progressive hearing impairment	0.0875	ACTG1,E2F1,MYH9	3
Cancer, Endocrine System Disorders, Gastrointestinal Disease, Organismal Injury and Abnormalities	pancreatic carcinoid tumor	0.0908	COL25A1,COL4A3,EIF1AX,LIN7A,MEX3D,NCKAP5L,PTPN12,RUNX1T1,SP3,SP4,TEP1,THBS3,TROVE2,ZNF211,ZNF814	15
Cellular Development, Cellular Growth and Proliferation	arrest in growth of neuroblastoma cell lines	0.0941	E2F1,POU4F1	2
Cellular Compromise, Neurological Disease	degeneration of neuroglia	0.0941	ASPA,MAPT	2
Cell Cycle, Skeletal and Muscular System Development and Function	entry into S phase of smooth muscle cells	0.0941	E2F1,MYBL1	2
Connective Tissue Disorders, Developmental Disorder, Organismal Injury and Abnormalities, Skeletal and Muscular Disorders	hypertelorism	0.0941	ACTG1,MMP2	2
Cancer, Cellular Movement, Organismal Injury and Abnormalities	invasion of smooth muscle cells	0.0941	MMP2,RUNX2	2
Cancer, Hematological Disease, Immunological Disease, Organismal Injury and Abnormalities	leukemia	0.0941	ABCB1,ABL2,ACTG1,ACTL6B,AMOT,ASH1L,ATRNL1,BCL2L11,BCL9L,BRD7,CCPG1,CD300E,CD58,CLDN5,COL16A1,COL25A1,COL4A4,CYP7B1,DYTN,E2F1,EEF1A1,FOXP1,GCC2,GPRASP1,GRM1,KLF3,LAMTOR2,LATS1,LUC7L2,MKL1,MMP2,MSX2,NOSTRIN,NPTXR,PCDHB10,PCLO,PER3,PGR,PPP2R2B,PPP4R1,PSIP1,REV3L,RIF1,RLF,RUNX1T1,SMTN,TEP1,THRAP3,TIMD4,UBE2J2,UPF2	51
Cellular Assembly and Organization, Hematopoiesis	formation of proplatelets	0.0962	MKL1,MYH9,SP3	3
Cell Death and Survival, Embryonic Development	apoptosis of embryonic cell lines	0.1	BCL2L11,DDX17,E2F1,EEF1A1,GRM1,HAX1,MAPT,PSIP1,TCF12	9
Cancer, Hematological Disease, Organismal Injury and Abnormalities	lymphoid cancer	0.101	ABCB1,ABL2,ACTG1,ACTL6B,AGTR1,AMOT,ASH1L,ATRNL1,BCL2L11,BCL9L,BMF,BRD7,CCPG1,CD300E,CD58,COL16A1,COL25A1,COL4A3,COL4A4,CSMD3,CYP7B1,DENND6A,DYRK1A,DYTN,E2F1,EEF1A1,EGR1,FOXP1,GCC2,GPRASP1,GPRIN1,GRM1,IFNGR1,JMJD1C,KIF21A,KLF3,LAMTOR2,LATS1,LUC7L2,MKL1,MMP2,MSX2,MYH9,NOSTRIN,NPTXR,PCDHB10,PCLO,PER3,PGR,PPP2R2B,PPP4R1,PSIP1,PTPN14,REV3L,RGS16,RIF1,RLF,RUNX1T1,SMARCA1,SMTN,SP4,STAT2,TARBP2,TEP1,THRA…	71
Cancer, Organismal Injury and Abnormalities, Skeletal and Muscular Disorders	rhabdomyosarcoma	0.103	CEL,CPEB2,DCX,DDX50,HRCT1,HS6ST1,KLF3,KLF5,MEX3D,MYH9,NCKAP5L,RB1CC1,RUNX1T1,SIX5,TTK,ZNF814	16
Cancer, Organismal Injury and Abnormalities, Skeletal and Muscular Disorders	myosarcoma	0.104	CEL,CPEB2,DCX,DDX50,HRCT1,HS6ST1,KLF3,KLF5,MEX3D,MYH9,NCKAP5L,PGR,RB1CC1,RUNX1T1,SIX5,TTK,ZNF814	17
Cancer, Dermatological Diseases and Conditions, Organismal Injury and Abnormalities	skin squamous cell carcinoma	0.105	AGTR1,BCL9L,CFHR4,COL11A1,COL19A1,CSMD3,DACH2,ESRP1,HTR1E,IL1RL1,IRF2,LIN7A,MARK2,MUC7,MYH9,NCKAP5L,OR2T2/OR2T35,OR2T3/OR2T34,OR4A15,OR4D5,OR4N2,PCLO,PDZRN4,RBM46,RGS22,RUNX1T1,THSD7A	27
Embryonic Development, Nervous System Development and Function, Organ Development, Organ Morphology, Organismal Development, Tissue Development, Visual System Development and Function	morphology of eye	0.105	ASPA,BCL2L11,COL4A3,COL8A1,E2F1,EGR1,HS6ST1,LMX1B,MAPT,MSX2,PSIP1,RBP1,TLE1	13
Infectious Diseases	Prion Infection	0.105	ASPA,IRF3,MAPT	3
Endocrine System Disorders, Organ Morphology, Organismal Injury and Abnormalities, Reproductive System Development and Function, Reproductive System Disease, Tissue Morphology	abnormal morphology of seminiferous epithelium	0.105	BCL2L11,JMJD1C,RBP1	3
Cell-To-Cell Signaling and Interaction, Cellular Assembly and Organization	quantity of focal adhesions	0.108	MYH9,PGR,PTPN12,PTPN14	4
Lipid Metabolism, Small Molecule Biochemistry, Vitamin and Mineral Metabolism	synthesis of terpenoid	0.108	ADH4,AGTR1,ALDH8A1,ASPA,CEL,CX3CL1,CYP7B1,GRM1,MMP2,RBP1,RUNX2,SLC27A5	12
Embryonic Development, Organ Development, Organismal Development, Tissue Development	development of sensory organ	0.108	ASPA,BCL2L11,BCL9,BCL9L,CCDC66,COL11A1,COL4A3,COL8A1,E2F1,EGR1,HS6ST1,LIN7A,LMX1B,MAPT,MMP2,MSX2,NIPBL,PSIP1,RBP1,STAU2,TLE1	21
Developmental Disorder, Embryonic Development, Organismal Development, Tissue Morphology	abnormal morphology of interparietal bone	0.108	LMX1B,MSX2,RUNX2	3
Cancer, Immunological Disease, Organismal Injury and Abnormalities	hyperplasia of lymph node	0.108	IRF2,MARK2,MYBL1	3
Cellular Growth and Proliferation	arrest in growth of bone marrow cell lines	0.108	MYBL1,RUNX2	2
Connective Tissue Development and Function, Skeletal and Muscular System Development and Function, Tissue Development	calcification of bone	0.108	KLF5,MSX2	2
Organismal Injury and Abnormalities	dysfunction of mice	0.108	MAPT,ZBTB20	2
Infectious Diseases	replication of human herpesvirus 8	0.108	BCL2L11,EGR1	2
RNA Post-Transcriptional Modification	unwinding of RNA	0.108	DDX17,DDX50	2
Connective Tissue Disorders, Organismal Injury and Abnormalities, Skeletal and Muscular Disorders	abnormality of rib	0.108	GNAI2,HOXB7,HOXB9,NIPBL,PCGF2,RUNX2	6
RNA Post-Transcriptional Modification	alternative splicing of mRNA	0.108	DDX17,DYRK1A,ESRP1,THRAP3	4
Cell Cycle, Gene Expression	binding of protein binding site	0.108	BRD7,CCAR1,E2F1,EGR1,IRF3,KLF5,NTS,PGR,RBBP6,RUNX2,SPZ1,TFDP1	12
Organ Morphology, Organismal Development, Organismal Injury and Abnormalities, Renal and Urological Disease, Renal and Urological System Development and Function	abnormal morphology of renal glomerulus	0.108	BCL2L11,COL4A3,LMX1B,MARK2,MYH9,NPHS2	6
Cell Death and Survival, Hair and Skin Development and Function	cell viability of epithelial cell lines	0.108	DYRK1A,MAPT,PCGF2,PSIP1,SLC40A1,STAT2	6
Hereditary Disorder, Neurological Disease, Organismal Injury and Abnormalities, Psychological Disorders, Skeletal and Muscular Disorders	familial Parkinson disease	0.108	GIGYF2,MAPT,VPS13C	3
Endocrine System Disorders, Gastrointestinal Disease, Metabolic Disease, Organismal Injury and Abnormalities	diabetic complication	0.108	AGTR1,CA13,COL11A1,COL16A1,COL19A1,COL25A1,COL4A3,COL4A4,COL8A1,TNNT2,TUSC3	11
Embryonic Development, Organismal Development, Skeletal and Muscular System Development and Function	development of forelimb	0.108	HOXB9,MSX2,NIPBL,RUNX2	4
Cell Death and Survival, Skeletal and Muscular Disorders	apoptosis of smooth muscle cells	0.108	AGTR1,E2F1,IRF2,KLF5,MKL1,TNNT2	6
Embryonic Development, Organismal Development	development of body axis	0.108	ABL2,ASPA,BCL2L11,BCL9,BCL9L,CCDC66,CLDN5,COL11A1,COL4A3,COL8A1,DCX,E2F1,EGR1,EPHA5,GRM1,HOXB7,HOXB9,HS6ST1,LIN7A,LMX1B,MAPT,MKL1,MMP2,MSX2,NIPBL,PCGF2,PSIP1,RBP1,RUNX2,SMARCA1,STAU2,TGIF1,TLE1,VWC2,ZBTB20	35
Embryonic Development, Organismal Development	development of body trunk	0.108	ACTG1,AGTR1,ARHGAP5,ASH1L,BCL2L11,BMF,CNOT9,COL11A1,COL4A3,COL4A4,CX3CL1,DMC1,DYRK1A,EGR1,FOXP1,HOXB9,HS6ST1,LATS1,LMX1B,MKL1,MMP2,MSX2,MYBL1,NIPBL,PGR,PTPN12,RB1CC1,RBP1,RUNX2,SLC40A1,SMTN,SP3,TAF4,TCF12,TNNT2,TRAT1,TSC22D1,UPF2,ZFX	39
Cancer, Connective Tissue Disorders, Organismal Injury and Abnormalities, Skeletal and Muscular Disorders	bone sarcoma	0.108	ATF7IP,CCAR1,LNP1,MKL1,PLEKHA6,UPF3A,ZMYM3	7
Neurological Disease, Organismal Injury and Abnormalities	brain lesion	0.108	ARHGAP5,BMF,CCDC66,COL11A1,COL4A3,CSMD3,E2F1,EPHA5,FAM171B,FBXL17,HPGDS,HS6ST1,JPH1,MAPT,MSRB3,MUC7,OR2T2/OR2T35,OR4N2,PCLO,PDE10A,RB1CC1,RBBP6,RUNX2,STAT2,TNRC6B,UPF3A,ZBTB20,ZFX,ZMYM3	29
Organ Morphology, Organismal Development, Organismal Injury and Abnormalities, Renal and Urological Disease, Renal and Urological System Development and Function	abnormal morphology of mesangial matrix	0.108	BCL2L11,COL4A3,NPHS2	3
Cellular Development, Connective Tissue Development and Function, Tissue Development	maturation of chondrocytes	0.108	E2F1,MSX2,RUNX2	3
Organismal Development, Tissue Development	development of exocrine gland	0.108	ARHGAP5,BCL2L11,HOXB9,HS6ST1,LATS1,MKL1,MSX2,MYBL1,PGR,RUNX2	10
Cancer, Endocrine System Disorders, Organismal Injury and Abnormalities	thyroid gland tumor	0.108	AMOT,BCL2L11,E2F1,EIF1AX,FNBP4,FOXP1,HRCT1,KLF3,LATS1,MEX3C,MMP2,OR13D1,OR2T2/OR2T35,PCLO,PDZRN4,PGR,PSIP1,RUNX2,UPF3A,ZNF814	20
Hereditary Disorder, Organismal Injury and Abnormalities	autosomal dominant disease	0.108	ACTG1,AGTR1,AHDC1,BCL2L11,CEL,COL11A1,COL4A3,COL4A4,DYRK1A,GIGYF2,HAX1,IFNGR1,JPH1,KIF21A,MAPT,MYBL1,MYH9,NIPBL,PDE10A,PPP2R2B,RUNX2,SLC40A1,SMARCA2,SOS2,TCF12,TGIF1,TRAT1,VAMP1,ZBTB20	29
Carbohydrate Metabolism, Drug Metabolism, Molecular Transport, Small Molecule Biochemistry	accumulation of doxorubicin	0.108	ABCB1,E2F1	2
Carbohydrate Metabolism, Drug Metabolism, Small Molecule Biochemistry	binding of heparan sulfate	0.108	FGF6,HS6ST1	2
Organismal Injury and Abnormalities, Renal and Urological Disease	bleeding of kidney	0.108	COL4A3,NPHS2	2
Cardiovascular Disease, Organismal Injury and Abnormalities	calcific aortic valve stenosis	0.108	MMP2,RUNX2	2
Embryonic Development, Organ Development, Organismal Development, Renal and Urological System Development and Function, Tissue Development	development of glomerular basement membrane	0.108	COL4A3,COL4A4	2
Tissue Development	formation of basal lamina	0.108	MARK2,MMP2	2
Cell Cycle	re-entry into S phase of bone cancer cell lines	0.108	E2F1,TFDP1	2
Cell Cycle	re-entry into S phase of sarcoma cell lines	0.108	E2F1,TFDP1	2
Embryonic Development, Nervous System Development and Function, Organ Development, Organ Morphology, Organismal Development, Tissue Development, Visual System Development and Function	thickness of retina	0.108	BCL2L11,PSIP1	2
Cancer, Gastrointestinal Disease, Organismal Injury and Abnormalities	esophageal squamous cell carcinoma	0.108	COL4A4,CYP7B1,DACH2,FAM171B,GALNT7,IRF2,KLF5,PCLO,SMARCC2	9
Hereditary Disorder, Immunological Disease, Organismal Injury and Abnormalities	familial autoimmune disease	0.108	BCL2L11,COL4A3,COL4A4,MYH9	4
Cell Cycle, Cellular Assembly and Organization, DNA Replication, Recombination, and Repair	remodeling of chromatin	0.108	ACTL6B,CCAR1,SMARCA1,SMARCA2,SMARCC2	5
Cancer, Hematological Disease, Immunological Disease, Organismal Injury and Abnormalities	hairy-cell leukemia	0.108	AMOT,ATRNL1,CCPG1,CD300E,COL4A4,NOSTRIN,NPTXR,PGR,RIF1,TIMD4,UBE2J2	11
Cell Morphology, Organ Morphology, Organismal Development, Organismal Injury and Abnormalities, Renal and Urological Disease, Renal and Urological System Development and Function	effacement of pedicels	0.108	COL4A3,MYH9,NPHS2	3
Tissue Development	formation of basement membrane	0.108	COL4A3,COL4A4,RUNX2	3
Connective Tissue Development and Function, Embryonic Development, Organismal Development, Skeletal and Muscular System Development and Function, Tissue Development	formation of cranium	0.108	MMP2,MSX2,RUNX2	3
Cell Death and Survival	cell viability of tumor cell lines	0.108	ABCB1,ABCB5,BCL2L11,BRD7,CCAR1,CEL,DCDC2,DYRK1A,E2F1,GTPBP4,HNRNPUL1,INPP4A,JMJD1C,KLF5,MAPT,PCGF2,POU4F1,PPP2R2A,PPP2R2B,PPP4R1,RB1CC1,REV3L,RUNX2,SLC40A1,SMARCA2,SMARCC2,TTK,ZBTB20	28
Embryonic Development, Organ Development, Organismal Development, Reproductive System Development and Function, Tissue Development	development of genital organ	0.108	ASH1L,BCL2L11,BMF,CLOCK,DMC1,EGR1,GALNTL5,HMGB2,JMJD1C,LATS1,MAEL,MMP2,MYBL1,NIPBL,PACRG,PGR,SIX5,TAF4,TARBP2,ZFX	20
Cellular Development, Cellular Growth and Proliferation, Hematological System Development and Function, Hematopoiesis, Lymphoid Tissue Structure and Development, Tissue Development	granulopoiesis	0.108	EGR1,HAX1,MYBL1,RBP1,RGL2,RUNX1T1,SP3	7
Gene Expression	initiation of transcription of RNA	0.108	E2F1,NRIP1,TAF4,THRAP3	4
Auditory Disease, Neurological Disease	nonsyndromic hearing impairment	0.108	ABCB1,ACTG1,DCDC2,MSRB3,MYH9	5
Cancer, Connective Tissue Disorders, Organismal Injury and Abnormalities	osteosarcoma	0.108	ABCB1,ATF7IP,CCAR1,LNP1,MKL1,PLEKHA6,RUNX2,THBS3,UPF3A,ZMYM3	10
Cell Death and Survival, Organismal Injury and Abnormalities	necrosis of epithelial tissue	0.108	ABL2,BCL2L11,BMF,COL4A3,DDX17,E2F1,EEF1A1,EGR1,GRM1,HAX1,IFNGR1,IRF3,KLF5,MAPT,MKL1,MMP2,MSX2,PSIP1,RB1CC1,RUNX2,TCF12	21
Embryonic Development, Organ Development, Organismal Development, Renal and Urological System Development and Function, Tissue Development	formation of renal glomerulus	0.108	COL4A3,COL4A4,LMX1B	3
Cardiovascular System Development and Function, Skeletal and Muscular System Development and Function	function of vascular smooth muscle	0.108	KLF5,MMP2,SPRR3	3
Connective Tissue Development and Function, Embryonic Development, Organ Development, Organismal Development, Skeletal and Muscular System Development and Function, Tissue Development	ossification of sternum	0.108	HOXB9,NIPBL,PCGF2	3
Cancer, Organismal Injury and Abnormalities, Skeletal and Muscular Disorders	muscle tumor	0.108	ATRNL1,CEL,CETN3,CPEB2,DCX,DDX50,HRCT1,HS6ST1,KLF3,KLF5,MEX3D,MMP2,MYBL1,MYH9,NCKAP5L,PGR,PPIG,PSIP1,RB1CC1,RUNX1T1,SIX5,TTK,ZNF814	23
Embryonic Development, Organ Development, Organ Morphology, Organismal Development, Organismal Injury and Abnormalities, Reproductive System Development and Function, Reproductive System Disease, Tissue Development	abnormal morphology of mammary alveolus	0.108	MKL1,PGR	2
Developmental Disorder, Embryonic Development, Organismal Development, Tissue Morphology	abnormal morphology of trophoectoderm	0.108	CUL3,KLF5	2
Cellular Development, Connective Tissue Development and Function	adipogenesis of fibroblasts	0.108	E2F1,TFDP1	2
Cell Cycle	entry into G2 phase	0.108	EGR1,RUNX2	2
Hereditary Disorder, Neurological Disease, Organismal Injury and Abnormalities, Psychological Disorders, Skeletal and Muscular Disorders	grade 3 Huntington disease	0.108	FOXP1,PDE10A	2
Cell Cycle, Connective Tissue Development and Function	re-entry into S phase of fibroblast cell lines	0.108	E2F1,TFDP1	2
Cancer, Organismal Injury and Abnormalities, Respiratory Disease	stage I lung adenocarcinoma	0.108	TARBP2,TNRC6B	2
Drug Metabolism, Lipid Metabolism, Small Molecule Biochemistry, Vitamin and Mineral Metabolism	synthesis of alitretinoin	0.108	ADH4,ALDH8A1	2
Endocrine System Development and Function, Molecular Transport, Protein Synthesis, Small Molecule Biochemistry	quantity of insulin in blood	0.108	ANGPTL6,CEL,E2F1,FFAR2,MARK2,PDE10A,PGR,TBC1D4,ZBTB20	9
Cancer, Organismal Injury and Abnormalities	upper aerodigestive tract carcinoma	0.108	A1BG,ABCB1,ATRNL1,CFHR4,COL11A1,COL19A1,COL4A4,COL8A1,CSMD3,CYP7B1,DACH2,EPHA5,ESRP1,FAAH2,FAM171B,FAM83B,FOXJ3,FOXP1,GALNT7,HAX1,IRF2,JMJD1C,KIF21A,KLF5,MAPT,MMP2,OR5M3,PCLO,RBBP6,REG3G,RIF1,SLC16A10,SMARCC2,TGIF1,THSD7A,TYW3,VWC2	37
Connective Tissue Disorders, Organismal Injury and Abnormalities, Skeletal and Muscular Disorders	abnormality of limb bone	0.108	ABCB1,LMX1B,MSX2,NIPBL,PGR,RUNX2,THBS3	7
RNA Post-Transcriptional Modification	splicing of RNA	0.108	DDX17,DYRK1A,ESRP1,KIAA0907,NONO,PPIG,SRSF4,THRAP3	8
RNA Post-Transcriptional Modification	splicing of mRNA	0.108	DDX17,DYRK1A,ESRP1,KIAA0907,SRSF4,THRAP3	6
Cell-To-Cell Signaling and Interaction, Nervous System Development and Function	evoked potential	0.108	ACTG1,COL4A3,GRM1,MSRB3,TGIF1	5
Cell Cycle	replication of cells	0.108	ABCB1,IRF3,REG1A,SOS2,TFDP1	5
Cardiovascular Disease, Organismal Injury and Abnormalities, Reproductive System Disease	preeclampsia	0.108	ALDH8A1,COL16A1,COL8A1,INMT,KLF5,MSRB3,NAA15,PGR,PLEKHA5,PNMA3,PPP2R2A,RUNX1T1,SLC16A10,SP3,TTK	15
Skeletal and Muscular System Development and Function	force generation	0.108	JPH1,MKL1,TNNT2	3
Cellular Development, Cellular Growth and Proliferation, Connective Tissue Development and Function	proliferation of fibroblast cell lines	0.108	ABL2,DACH1,E2F1,EGR1,GNAI2,GTPBP4,HRASLS,INPP4A,IRF2,IRF3,KLF5,RUNX1T1,RUNX2,SMARCA2,SPZ1,TGIF1	16
Cancer, Organismal Injury and Abnormalities	soft tissue neoplasm	0.108	ABCB1,ABL2,CEL,CPEB2,DCX,DDX50,GNAI2,HRCT1,HS6ST1,KLF3,KLF5,MEX3D,MYH9,NCKAP5L,PGR,RB1CC1,RUNX1T1,SIX5,SMARCA2,TTK,ZNF814	21
Embryonic Development, Nervous System Development and Function, Ophthalmic Disease, Organ Development, Organ Morphology, Organismal Development, Organismal Injury and Abnormalities, Tissue Development, Visual System Development and Function	abnormal morphology of cornea	0.108	COL8A1,EGR1,LMX1B,MSX2	4
Embryonic Development, Organ Development, Organismal Development, Reproductive System Development and Function, Tissue Development	formation of mammary gland	0.108	ARHGAP5,BCL2L11,HOXB9,LATS1,MKL1,MSX2,MYBL1,PGR,RUNX2	9
Cardiovascular Disease, Organismal Injury and Abnormalities	microangiopathy	0.108	ABCB1,AGTR1,AMOT,COL4A3,LMX1B,MARK2,NPHS2	7
Humoral Immune Response, Protein Synthesis	quantity of IgG3	0.108	ABCB1,IFNGR1,LGALS2,MARK2,MYBL1	5
Cell Cycle	interphase	0.108	ABCB1,CEL,CUL3,DARS,DCX,DYRK1A,E2F1,EGR1,LATS1,MYBL1,NRIP1,PGR,POU4F1,PPP2R2A,RB1CC1,RBBP6,REV3L,RUNX1T1,RUNX2,SMARCA1,SMARCA2,TFDP1,UBQLN2	23
Connective Tissue Disorders, Organismal Injury and Abnormalities, Skeletal and Muscular Disorders, Skeletal and Muscular System Development and Function	rib fusion	0.108	GNAI2,HOXB7,HOXB9,PCGF2	4
Gene Expression, RNA Damage and Repair, RNA Post-Transcriptional Modification	stabilization of RNA	0.108	E2F1,RBM46,TEP1,THRAP3	4
Connective Tissue Disorders, Organismal Development, Organismal Injury and Abnormalities, Skeletal and Muscular Disorders, Skeletal and Muscular System Development and Function	abnormal morphology of shoulder girdle	0.108	LMX1B,PCGF2,RUNX2	3
Connective Tissue Disorders, Developmental Disorder, Organismal Injury and Abnormalities, Skeletal and Muscular Disorders	craniosynostosis	0.108	MSX2,RUNX2,TCF12	3
Cancer, Organismal Injury and Abnormalities	malignant neoplasm of aerodigestive tract	0.108	A1BG,ABCB1,ATRNL1,CFHR4,COL11A1,COL19A1,COL4A4,COL8A1,CSMD3,CYP7B1,DACH2,EPHA5,ESRP1,FAAH2,FAM171B,FAM83B,FOXJ3,FOXP1,GALNT7,HAX1,IRF2,JMJD1C,KIF21A,KLF5,MAPT,MMP2,OR5M3,PCLO,RBBP6,RBP1,REG3G,RIF1,SLC16A10,SMARCC2,TGIF1,THSD7A,TYW3,VWC2	38
Cellular Growth and Proliferation, Tissue Development	proliferation of epithelial cells	0.108	AGTR1,ANGPTL6,COL8A1,CSMD3,CUL3,CYP7B1,DACH1,E2F1,ESRP1,FGF6,HOXB7,IFNGR1,KDF1,KLF5,NTS,PGR,PTPN12,REG3G	18
Cancer, Organismal Injury and Abnormalities	blue round small cell tumor	0.108	CEL,COL11A1,CPEB2,CSMD3,DCX,DDX50,HRCT1,HS6ST1,KLF3,KLF5,MEX3D,MYH9,NCKAP5L,NTS,OR2T2/OR2T35,RB1CC1,RUNX1T1,SIX5,TTK,ZNF814	20
Cardiovascular Disease, Cardiovascular System Development and Function, Organismal Injury and Abnormalities, Tissue Morphology	abnormal morphology of aorta wall	0.108	KLF5,MMP2	2
Cellular Compromise, Tissue Morphology	degeneration of epithelial cells	0.108	HMGB2,MSX2	2
Organismal Development	delay in development of organism	0.108	DYRK1A,REV3L	2
Organ Development, Reproductive System Development and Function, Tissue Development	function of mammary gland	0.108	MKL1,PGR	2
Cell Morphology, Cellular Assembly and Organization, Cellular Development, Cellular Function and Maintenance, Cellular Growth and Proliferation, Nervous System Development and Function, Organismal Development, Tissue Development	neuritogenesis of neuroblastoma cell lines	0.108	ABL2,ARHGAP5	2
Cellular Development, Cellular Growth and Proliferation, Connective Tissue Development and Function, Skeletal and Muscular System Development and Function, Tissue Development	proliferation of osteoprogenitor cells	0.108	MSX2,RUNX2	2
Amino Acid Metabolism, Molecular Transport, Small Molecule Biochemistry	transport of essential amino acids	0.108	SLC16A10,SLC25A2	2
Cellular Development, Connective Tissue Development and Function	differentiation of fibroblast cell lines	0.108	CCAR1,DYRK1A,MSX2,PGR,RBP1,RUNX2,SMARCA2,THRAP3	8
Organismal Development, Skeletal and Muscular Disorders, Skeletal and Muscular System Development and Function	abnormal morphology of zeugopod	0.108	LMX1B,MSX2,NIPBL,PGR,RUNX2	5
Nervous System Development and Function, Neurological Disease, Organ Morphology, Organismal Development, Organismal Injury and Abnormalities	abnormal morphology of thalamus	0.108	AGTR1,DYRK1A,POU4F1	3
Cell Death and Survival	apoptosis of exocrine cells	0.108	E2F1,IFNGR1,MKL1	3
Cellular Development, Cellular Growth and Proliferation, Connective Tissue Development and Function, Skeletal and Muscular System Development and Function, Tissue Development	development of chondrocytes	0.108	COL11A1,MSX2,RUNX2	3
Cancer, Endocrine System Disorders, Organismal Injury and Abnormalities	malignant neoplasm of endocrine gland	0.108	AGTR1,AMOT,BCL2L11,COL11A1,CSMD3,EIF1AX,FOXP1,HRCT1,KLF3,LATS1,MMP2,NTS,OR13D1,OR2T2/OR2T35,PCLO,PSIP1,RUNX1T1,RUNX2,UPF3A	19
Skeletal and Muscular System Development and Function	morphogenesis of skeletal system	0.108	COL11A1,HOXB7,MMP2,MSX2,NIPBL,PCGF2,RUNX2	7
Cancer, Neurological Disease, Organismal Injury and Abnormalities	central nervous system tumor	0.108	ARHGAP5,ASPA,BMF,CCDC66,CLDN5,COL11A1,COL4A3,CSMD3,E2F1,EPHA5,FAM171B,FBXL17,GPRASP1,HS6ST1,IRF3,JPH1,KIF21A,KLF3,MMP2,MSRB3,MUC7,MYH9,OR2T2/OR2T35,OR4N2,PCLO,PGR,RB1CC1,RBBP6,RUNX2,STAT2,TNRC6B,TUSC3,UPF3A,ZBTB20,ZFX,ZMYM3,ZNF660	37
Cancer, Organismal Injury and Abnormalities, Renal and Urological Disease	renal clear cell adenocarcinoma	0.108	ABCB1,ARHGAP5,CCDC82,COL28A1,CPEB2,CSMD3,GPRIN1,KIF21A,KLF3,MCTP1,MMP2,NIPBL,PCLO,PNISR,REV3L,RUNX2,SMARCA2,SMARCC2,SMTN,SP4,TCF12,TGIF1,THRAP3,THSD7A,UPF3A,ZNF493	26
Cancer, Neurological Disease, Organismal Injury and Abnormalities	brain tumor	0.108	ARHGAP5,BMF,CCDC66,COL11A1,COL4A3,CSMD3,E2F1,EPHA5,FAM171B,FBXL17,HS6ST1,JPH1,MSRB3,MUC7,OR2T2/OR2T35,OR4N2,PCLO,RB1CC1,RBBP6,RUNX2,STAT2,TNRC6B,UPF3A,ZBTB20,ZFX,ZMYM3	26
Cancer, Organismal Injury and Abnormalities, Skeletal and Muscular Disorders	embryonal rhabdomyosarcoma	0.108	CEL,CPEB2,DDX50,HRCT1,HS6ST1,KLF3,KLF5,MEX3D,MYH9,NCKAP5L,RB1CC1,RUNX1T1,SIX5	13
Hematological System Development and Function, Lymphoid Tissue Structure and Development, Tissue Morphology	quantity of CD8+ T lymphocyte	0.108	BCL2L11,BMF,E2F1,HAX1,IFNGR1,LGALS2,TCF12	7
Lymphoid Tissue Structure and Development, Tissue Morphology	quantity of lymph follicle	0.108	BCL2L11,BMF,GNAI2,HAX1,IFNGR1,KLF3,MYBL1	7
Cellular Growth and Proliferation	colony formation of breast cancer cell lines	0.108	E2F1,HOXB7,PCGF2,PGR,RUNX2	5
Embryonic Development, Organismal Development	development of head	0.108	ABL2,ASPA,BCL2L11,BCL9,BCL9L,CCDC66,CLDN5,COL11A1,COL4A3,COL8A1,DCX,E2F1,EGR1,EPHA5,GRM1,HS6ST1,LIN7A,LMX1B,MAPT,MKL1,MMP2,MSX2,NIPBL,PSIP1,RBP1,RUNX2,SMARCA1,STAU2,TGIF1,TLE1,VWC2,ZBTB20	32
Endocrine System Disorders, Organ Morphology, Organismal Development, Organismal Injury and Abnormalities, Reproductive System Development and Function, Reproductive System Disease	lack of corpus luteum	0.108	EGR1,LATS1,PGR	3
Drug Metabolism, Lipid Metabolism, Small Molecule Biochemistry, Vitamin and Mineral Metabolism	metabolism of tretinoin	0.108	ADH4,ALDH8A1,RBP1	3
Cancer, Organismal Injury and Abnormalities, Skeletal and Muscular Disorders	musculoskeletal cancer	0.108	ATF7IP,CCAR1,LNP1,MKL1,PLEKHA6,PSIP1,UPF3A,ZMYM3	8
RNA Post-Transcriptional Modification	processing of mRNA	0.108	DDX17,DYRK1A,ESRP1,KIAA0907,NONO,SCAF4,SRSF4,THRAP3	8
Cancer, Neurological Disease, Organismal Injury and Abnormalities	brain glioma formation	0.108	ARHGAP5,BMF,CCDC66,COL11A1,CSMD3,E2F1,EPHA5,FAM171B,HS6ST1,JPH1,MSRB3,MUC7,OR2T2/OR2T35,OR4N2,PCLO,RB1CC1,RBBP6,RUNX2,TNRC6B,UPF3A,ZBTB20	21
Endocrine System Development and Function	glucose tolerance	0.108	CEP19,CX3CL1,E2F1,FFAR2,MARK2,NRIP1,PGR,PLCL1,RBP1,TBC1D4,ZBTB20	11
Cancer, Organismal Injury and Abnormalities	neck neoplasm	0.108	AMOT,BCL2L11,COL11A1,COL19A1,COL4A4,CSMD3,E2F1,EIF1AX,FAM83B,FNBP4,FOXP1,HRCT1,JMJD1C,KIF21A,KLF3,LATS1,MEX3C,MMP2,OR13D1,OR2T2/OR2T35,PCLO,PDZRN4,PGR,PSIP1,REG3G,RUNX2,THSD7A,TYW3,UPF3A,VWC2,ZNF814	31
Cancer, Organismal Injury and Abnormalities	upper aero-digestive squamous cell carcinoma	0.108	ATRNL1,COL11A1,COL4A4,CYP7B1,DACH2,ESRP1,FAM171B,GALNT7,HAX1,IRF2,KLF5,PCLO,SMARCC2,TGIF1	14
Endocrine System Disorders, Organ Morphology, Organismal Development, Organismal Injury and Abnormalities, Reproductive System Development and Function, Reproductive System Disease	abnormal morphology of ovarian follicle	0.108	DMC1,E2F1,EGR1,LATS1,PGR	5
Connective Tissue Disorders, Organismal Injury and Abnormalities, Skeletal and Muscular Disorders, Skeletal and Muscular System Development and Function	abnormal morphology of appendicular skeleton	0.108	LMX1B,MSX2,NIPBL,PCGF2,PGR,RUNX2,THBS3	7
Dermatological Diseases and Conditions, Organ Morphology, Organismal Injury and Abnormalities	abnormal morphology of interdigital web	0.108	BCL2L11,BMF	2
Cell Death and Survival	anoikis of breast cell lines	0.108	BCL2L11,BMF	2
Cellular Assembly and Organization	binding of vesicles	0.108	APOH,RBP1	2
Cell Death and Survival	cell death of medium spiny neurons	0.108	GRM1,INPP4A	2
Organismal Injury and Abnormalities	dysplasia of cells	0.108	E2F1,LMX1B	2
Cell Cycle, DNA Replication, Recombination, and Repair	homologous pairing of chromosomes	0.108	DMC1,MYBL1	2
Cellular Movement, Hematological System Development and Function, Immune Cell Trafficking	migration of effector lymphocytes	0.108	CX3CL1,MYH9	2
Cell Cycle, Hepatic System Development and Function	ploidy of hepatocytes	0.108	CUL3,E2F1	2
Cancer, Neurological Disease, Organismal Injury and Abnormalities	tumorigenesis of medulloblastoma	0.108	E2F1,STAT2	2
Small Molecule Biochemistry	uptake of hormone	0.108	PGR,SLC16A10	2
Cell Death and Survival	anoikis	0.108	BCL2L11,BMF,CPEB2,E2F1,EEF1A1,TFDP1	6
Cellular Development, Cellular Growth and Proliferation, Hematological System Development and Function, Hematopoiesis, Lymphoid Tissue Structure and Development, Tissue Development	myelopoiesis of leukocytes	0.108	CLEC4M,EGR1,FOXP1,HAX1,MYBL1,RBP1,RGL2,RUNX1T1,SP3	9
Cardiovascular System Development and Function	function of blood vessel	0.108	KLF5,MMP2,SMTN,SPRR3	4
Behavior, Nervous System Development and Function	circadian rhythm	0.108	CLOCK,CYP7B1,DYRK1A,NONO,NR1D2,PER3	6
Cardiovascular Disease, Organismal Injury and Abnormalities, Tissue Morphology	area of atherosclerotic lesion	0.108	CEL,CX3CL1,EGR1	3
Embryonic Development, Organismal Development, Skeletal and Muscular System Development and Function	morphogenesis of embryonic forelimb	0.108	MSX2,NIPBL,RUNX2	3
Connective Tissue Development and Function, Connective Tissue Disorders, Organismal Injury and Abnormalities, Skeletal and Muscular Disorders, Skeletal and Muscular System Development and Function, Tissue Development	abnormal morphology of trabecular bone	0.108	EGR1,MMP2,MSX2,PGR,RUNX2	5
Cell Cycle, Gene Expression	binding of DNA	0.108	APOH,BRD7,CCAR1,E2F1,EGR1,FOXP1,HMGB2,IRF3,KLF5,MAPT,NTS,PGR,PSIP1,RBBP6,RUNX1T1,RUNX2,SPZ1,TFDP1	18
Connective Tissue Disorders, Developmental Disorder, Hereditary Disorder, Ophthalmic Disease, Organismal Injury and Abnormalities, Skeletal and Muscular Disorders	Baraitser-Winter syndrome type 2	0.108	ACTG1	1
Cancer, Cellular Response to Therapeutics, Organismal Injury and Abnormalities	Epithilone B resistance of neuroblastoma cell lines	0.108	ACTG1	1
Cell Cycle	G1/S phase transition of bladder cancer cell lines	0.108	DARS	1
Cancer, Organismal Injury and Abnormalities, Reproductive System Disease	Gleason's score 10 prostate cancer	0.108	GRM1	1
Cancer, Organismal Injury and Abnormalities, Reproductive System Disease	Gleason's score 6 prostate cancer	0.108	GRM1	1
Cancer, Organismal Injury and Abnormalities, Reproductive System Disease	Gleason's score 8 prostate cancer	0.108	GRM1	1
Cancer, Organismal Injury and Abnormalities, Reproductive System Disease	Gleason's score 9 prostate cancer	0.108	GRM1	1
Auditory Disease, Cardiovascular Disease, Connective Tissue Disorders, Developmental Disorder, Hematological Disease, Hereditary Disorder, Neurological Disease, Organismal Injury and Abnormalities	Macrothrombocytopenia and progressive sensorineural deafness	0.108	MYH9	1
Connective Tissue Disorders, Dermatological Diseases and Conditions, Developmental Disorder, Hereditary Disorder, Inflammatory Disease, Ophthalmic Disease, Organismal Injury and Abnormalities, Skeletal and Muscular Disorders	Marshall/Stickler syndrome	0.108	COL11A1	1
Endocrine System Disorders, Gastrointestinal Disease, Hereditary Disorder, Metabolic Disease, Organismal Injury and Abnormalities	Maturity onset diabetes of the young type 8	0.108	CEL	1
Cardiovascular Disease, Connective Tissue Disorders, Hematological Disease, Hereditary Disorder, Organismal Injury and Abnormalities	May-Hegglin anomaly	0.108	MYH9	1
Connective Tissue Disorders, Developmental Disorder, Hereditary Disorder, Organismal Injury and Abnormalities, Skeletal and Muscular Disorders	Noonan syndrome type 9	0.108	SOS2	1
Hereditary Disorder, Neurological Disease, Organismal Injury and Abnormalities, Psychological Disorders, Skeletal and Muscular Disorders	Parkinson disease 11	0.108	GIGYF2	1
Connective Tissue Disorders, Developmental Disorder, Hereditary Disorder, Neurological Disease, Organismal Injury and Abnormalities, Skeletal and Muscular Disorders	Primrose syndrome	0.108	ZBTB20	1
Cardiovascular Disease, Connective Tissue Disorders, Developmental Disorder, Hematological Disease, Hereditary Disorder, Organismal Injury and Abnormalities	Sebastian syndrome	0.108	MYH9	1
Cardiovascular Disease, Dermatological Diseases and Conditions, Neurological Disease, Organismal Injury and Abnormalities	Sneddon syndrome	0.108	ADA2	1
Connective Tissue Disorders, Developmental Disorder, Hereditary Disorder, Inflammatory Disease, Ophthalmic Disease, Organismal Injury and Abnormalities, Skeletal and Muscular Disorders	Stickler syndrome type 2	0.108	COL11A1	1
Cancer, Organismal Injury and Abnormalities, Renal and Urological Disease, Skeletal and Muscular Disorders	T2-4 stage invasive bladder carcinoma	0.108	PSIP1	1
Developmental Disorder, Hereditary Disorder, Neurological Disease, Organismal Injury and Abnormalities	X-linked lissencephaly type 1	0.108	DCX	1
Developmental Disorder, Hereditary Disorder, Neurological Disease, Organismal Injury and Abnormalities	X-linked subcortical laminar heterotopia	0.108	DCX	1
Developmental Disorder, Hereditary Disorder, Neurological Disease, Organismal Injury and Abnormalities	Xia-Gibbs syndrome	0.108	AHDC1	1
Embryonic Development, Nervous System Development and Function, Ophthalmic Disease, Organ Development, Organ Morphology, Organismal Development, Organismal Injury and Abnormalities, Tissue Development, Visual System Development and Function	abnormal morphology of enlarged anterior chamber of eye	0.108	EGR1	1
Connective Tissue Development and Function, Connective Tissue Disorders, Organismal Development, Organismal Injury and Abnormalities, Skeletal and Muscular Disorders, Skeletal and Muscular System Development and Function, Tissue Development	abnormal morphology of lambdoid suture	0.108	MMP2	1
Drug Metabolism, Endocrine System Development and Function, Lipid Metabolism, Molecular Transport, Small Molecule Biochemistry	abnormal quantity of progesterone	0.108	EGR1	1
Tissue Development	accumulation of basement membrane	0.108	MARK2	1
Hematological System Development and Function, Hematopoiesis, Inflammatory Response, Tissue Development	accumulation of megakaryocytes	0.108	E2F1	1
Hematological System Development and Function, Hematopoiesis, Humoral Immune Response, Immune Cell Trafficking, Inflammatory Response, Tissue Development	accumulation of transitional 1 B lymphocytes	0.108	BMF	1
Cell-To-Cell Signaling and Interaction, Nervous System Development and Function	action potential of thalamocortical neurons	0.108	GRM1	1
Lipid Metabolism, Small Molecule Biochemistry	activation of bile acid	0.108	SLC27A5	1
Cell-To-Cell Signaling and Interaction, Hematological System Development and Function, Immune Cell Trafficking, Inflammatory Response	activation of exudate macrophages	0.108	IL1RL1	1
Cell-To-Cell Signaling and Interaction	activation of eye cell lines	0.108	PSIP1	1
Cellular Assembly and Organization	adhesion of phosphatidylserine vesicles	0.108	APOH	1
Neurological Disease, Organismal Injury and Abnormalities, Renal and Urological Disease	adipsia	0.108	HAX1	1
Gastrointestinal Disease, Hepatic System Disease	advanced stage cholestasis	0.108	CYP7B1	1
Neurological Disease, Organismal Injury and Abnormalities, Psychological Disorders	age-associated memory impairment	0.108	MAPT	1
Cell-To-Cell Signaling and Interaction	aggregation of breast cell lines	0.108	AMOT	1
Cell-To-Cell Signaling and Interaction	aggregation of schwannoma cell lines	0.108	GTPBP4	1
Neurological Disease, Psychological Disorders	akathisia	0.108	ABCB1	1
Neurological Disease	amyotrophic lateral sclerosis type 15	0.108	UBQLN2	1
Cancer, Organismal Injury and Abnormalities	angiogenesis of chondrosarcoma	0.108	MMP2	1
Cancer, Cell Death and Survival, Organismal Injury and Abnormalities, Tumor Morphology	apoptosis of cervical cancer cells	0.108	TSC22D1	1
Cell Death and Survival, Embryonic Development	apoptosis of cranial neural crest cells	0.108	MSX2	1
Cell Death and Survival, Organismal Injury and Abnormalities, Skeletal and Muscular Disorders	apoptosis of myoepithelial cells	0.108	MKL1	1
Cell Death and Survival, Neurological Disease, Organismal Injury and Abnormalities	apoptosis of neocortical neurons	0.108	BCL2L11	1
Cellular Development, Cellular Growth and Proliferation, Embryonic Development, Hematological System Development and Function, Hematopoiesis, Organismal Development, Tissue Development	arrest in development of lymphoid-primed multipotent progenitor cells	0.108	TCF12	1
Cellular Development, Connective Tissue Development and Function, Skeletal and Muscular System Development and Function, Tissue Development	arrest in maturation of osteoblasts	0.108	RUNX2	1
Cell Morphology, Cellular Function and Maintenance	autophagy of myeloma cell lines	0.108	BCL2L11	1
Auditory Disease, Hereditary Disorder, Neurological Disease, Organismal Injury and Abnormalities	autosomal dominant 17 deafness	0.108	MYH9	1
Auditory Disease, Hereditary Disorder, Neurological Disease, Organismal Injury and Abnormalities	autosomal dominant deafness type 20	0.108	ACTG1	1
Developmental Disorder, Hereditary Disorder, Neurological Disease, Organismal Injury and Abnormalities	autosomal dominant mental retardation type 7	0.108	DYRK1A	1
Hereditary Disorder, Immunological Disease, Infectious Diseases, Organismal Injury and Abnormalities	autosomal dominant mycobacteriosis immunodeficiency 27B	0.108	IFNGR1	1
Hereditary Disorder, Neurological Disease, Organismal Injury and Abnormalities	autosomal dominant spastic ataxia type 1	0.108	VAMP1	1
Hereditary Disorder, Neurological Disease, Organismal Injury and Abnormalities, Psychological Disorders	autosomal dominant striatal degeneration 2	0.108	PDE10A	1
Auditory Disease, Hereditary Disorder, Neurological Disease, Organismal Injury and Abnormalities	autosomal recessive deafness type 66	0.108	DCDC2	1
Auditory Disease, Hereditary Disorder, Neurological Disease, Organismal Injury and Abnormalities	autosomal recessive deafness type 74	0.108	MSRB3	1
Hereditary Disorder, Neurological Disease, Organismal Injury and Abnormalities, Psychological Disorders, Skeletal and Muscular Disorders	autosomal recessive early-onset parkinson disease 23	0.108	VPS13C	1
Developmental Disorder, Hereditary Disorder, Neurological Disease, Organismal Injury and Abnormalities	autosomal recessive mental retardation type 7	0.108	TUSC3	1
Connective Tissue Disorders, Hereditary Disorder, Organismal Injury and Abnormalities, Skeletal and Muscular Disorders	autosomal recessive multicentric osteolysis	0.108	MMP2	1
Hereditary Disorder, Infectious Diseases, Organismal Injury and Abnormalities	autosomal recessive mycobacteriosis immunodeficiency 27A	0.108	IFNGR1	1
Hereditary Disorder, Neurological Disease, Organismal Injury and Abnormalities	autosomal recessive spinocerebellar ataxia type 13	0.108	GRM1	1
Carbohydrate Metabolism, Lipid Metabolism, Small Molecule Biochemistry	binding of 1,2-dioleoylphosphatidylserine	0.108	APOH	1
Infectious Diseases	binding of Murine leukemia virus	0.108	SMARCA2	1
Gene Expression, RNA Post-Transcriptional Modification	binding of Vault	0.108	TEP1	1
Cellular Assembly and Organization	binding of lipid bilayer	0.108	APOH	1
Cellular Assembly and Organization	binding of thin filaments	0.108	TNNT2	1
Cell Morphology, Cellular Assembly and Organization, Cellular Development, Cellular Function and Maintenance, Cellular Growth and Proliferation, Nervous System Development and Function, Organismal Development, Tissue Development	branching of trigeminal ganglion neurons	0.108	POU4F1	1
Connective Tissue Disorders, Hereditary Disorder, Organismal Injury and Abnormalities	branchiootorenal syndrome 2	0.108	SIX5	1
Connective Tissue Development and Function, Skeletal and Muscular System Development and Function, Tissue Development	calcification of endochondral bone	0.108	KLF5	1
Small Molecule Biochemistry	catabolism of polyphosphate	0.108	INPP4A	1
Cell Cycle, Connective Tissue Development and Function, Skeletal and Muscular System Development and Function	cell cycle progression of myofibroblasts	0.108	KLF5	1
Cell Death and Survival	cell viability of endometrial cells	0.108	PGR	1
Cellular Movement	cellular infiltration by alpha islet cells	0.108	RBP1	1
Cardiovascular Disease	childhood hypertension	0.108	AGTR1	1
Cardiovascular Disease, Hereditary Disorder, Immunological Disease, Inflammatory Disease, Inflammatory Response, Organismal Injury and Abnormalities	childhood-onset polyarteritis nodosa	0.108	ADA2	1
Developmental Disorder, Gastrointestinal Disease, Hereditary Disorder, Immunological Disease, Organismal Injury and Abnormalities, Respiratory Disease	choanal atresia and lymphedema	0.108	PTPN14	1
Small Molecule Biochemistry	clearance of SN-38	0.108	ABCB1	1
Carbohydrate Metabolism, Drug Metabolism, Small Molecule Biochemistry	clearance of doxorubicin	0.108	ABCB1	1
Developmental Disorder, Hereditary Disorder, Metabolic Disease, Organismal Injury and Abnormalities	colchicine resistance	0.108	ABCB1	1
Lipid Metabolism, Molecular Transport, Small Molecule Biochemistry, Vitamin and Mineral Metabolism	concentration of 9-cis-retinol	0.108	RBP1	1
Lipid Metabolism, Molecular Transport, Small Molecule Biochemistry, Vitamin and Mineral Metabolism	concentration of vitamin A	0.108	RBP1	1
Developmental Disorder, Gastrointestinal Disease, Hepatic System Disease, Hereditary Disorder, Metabolic Disease, Organismal Injury and Abnormalities	congenital bile acid synthesis defect type 3	0.108	CYP7B1	1
Developmental Disorder, Hereditary Disorder, Neurological Disease, Ophthalmic Disease, Organismal Injury and Abnormalities, Skeletal and Muscular Disorders	congenital fibrosis of extraocular muscles 3B	0.108	KIF21A	1
Developmental Disorder, Hereditary Disorder, Neurological Disease, Ophthalmic Disease, Organismal Injury and Abnormalities, Skeletal and Muscular Disorders	congenital fibrosis of extraocular muscles type 1	0.108	KIF21A	1
Developmental Disorder, Hereditary Disorder, Neurological Disease, Ophthalmic Disease, Organismal Injury and Abnormalities, Skeletal and Muscular Disorders	congenital fibrosis of extraocular muscles type 5	0.108	COL25A1	1
Developmental Disorder, Hematological Disease, Immunological Disease	congenital malformation of megakaryocytes	0.108	MKL1	1
Digestive System Development and Function	contractility of jejunal muscularis	0.108	SMTN	1
Nervous System Development and Function, Organismal Development	coordination of body trunk	0.108	POU4F1	1
Connective Tissue Disorders, Developmental Disorder, Organismal Injury and Abnormalities, Skeletal and Muscular Disorders	craniosynostosis type 2	0.108	MSX2	1
Connective Tissue Disorders, Developmental Disorder, Hereditary Disorder, Organismal Injury and Abnormalities, Skeletal and Muscular Disorders	craniosynostosis type 3	0.108	TCF12	1
Lipid Metabolism, Small Molecule Biochemistry	critical micelle concentration of arachidonic acid	0.108	MAPT	1
Lipid Metabolism, Small Molecule Biochemistry	critical micelle concentration of palmitoleic acid	0.108	MAPT	1
Lipid Metabolism, Small Molecule Biochemistry	critical micelle concentration of stearic acid	0.108	MAPT	1
Cell Death and Survival	cytolysis of bladder cancer cell lines	0.108	CX3CL1	1
Cellular Compromise, Connective Tissue Disorders, Gastrointestinal Disease, Organismal Injury and Abnormalities, Tissue Morphology	degeneration of ameloblasts	0.108	MSX2	1
Cellular Compromise, Neurological Disease, Organismal Injury and Abnormalities	degeneration of anterior bulbar cells	0.108	MAPT	1
Cellular Compromise, Neurological Disease	degeneration of glial cell projections	0.108	MAPT	1
Dental Disease, Gastrointestinal Disease, Organismal Injury and Abnormalities	degeneration of molar tooth	0.108	MSX2	1
Cellular Compromise, Neurological Disease	degeneration of oligodendrocytes	0.108	ASPA	1
Cell Cycle, Skeletal and Muscular System Development and Function	delay in G1 phase of bone cell lines	0.108	RUNX2	1
Cellular Compromise, Reproductive System Development and Function	delay in acidification of gonadal cell lines	0.108	ABCB1	1
Cell Cycle, Embryonic Development	delay in cell cycle progression of embryonic cell lines	0.108	TFDP1	1
Cell Cycle, Renal and Urological System Development and Function	delay in cell cycle progression of kidney cell lines	0.108	TFDP1	1
Connective Tissue Development and Function, Skeletal and Muscular System Development and Function, Tissue Development	delay in endochondral ossification of bone	0.108	E2F1	1
Cellular Assembly and Organization, Cellular Function and Maintenance	density of endoplasmic reticulum	0.108	MAPT	1
Connective Tissue Disorders, Dental Disease, Developmental Disorder, Gastrointestinal Disease, Hereditary Disorder, Organismal Injury and Abnormalities, Skeletal and Muscular Disorders	dental anomalies only forme fruste cleidocranial dysplasia	0.108	RUNX2	1
Auditory and Vestibular System Development and Function, Cell Morphology, Cell-To-Cell Signaling and Interaction, Cellular Function and Maintenance, Nervous System Development and Function	depolarization of type II spiral ganglion neurons	0.108	GRM1	1
Cell-To-Cell Signaling and Interaction, Cellular Assembly and Organization	detachment of focal adhesions	0.108	MYH9	1
Cellular Development, Cellular Growth and Proliferation, Embryonic Development, Organ Development, Organismal Development, Renal and Urological System Development and Function, Tissue Development	development of podocytes	0.108	LMX1B	1
Embryonic Development, Nervous System Development and Function, Organ Development, Organismal Development, Tissue Development	development of retrosplenial cortex	0.108	ZBTB20	1
Embryonic Development, Nervous System Development and Function, Organ Development, Organismal Development, Tissue Development, Visual System Development and Function	development of sclera	0.108	MMP2	1
Embryonic Development, Nervous System Development and Function, Organ Development, Organismal Development, Tissue Development	development of subiculum	0.108	ZBTB20	1
Cell Morphology, Cellular Assembly and Organization, Cellular Development, Cellular Function and Maintenance, Cellular Growth and Proliferation, Embryonic Development, Nervous System Development and Function, Organismal Development, Tissue Development	development of synaptic spine	0.108	STAU2	1
Cellular Development, Embryonic Development, Nervous System Development and Function, Organismal Development, Tissue Development	differentiation of cranial neural crest cells	0.108	MSX2	1
Cellular Development, Connective Tissue Development and Function, Tissue Development	differentiation of endochondral bone	0.108	KLF5	1
Cardiovascular Disease, Cellular Development, Hematological System Development and Function, Lymphoid Tissue Structure and Development, Organismal Injury and Abnormalities	differentiation of foam cells	0.108	LDAH	1
Cancer, Cellular Development, Organismal Injury and Abnormalities	differentiation of osteosarcoma cells	0.108	E2F1	1
Cardiovascular Disease, Hereditary Disorder, Organismal Injury and Abnormalities, Skeletal and Muscular Disorders	dilated cardiomyopathy 1d	0.108	TNNT2	1
Behavior	disinhibited behavior	0.108	MAPT	1
Cellular Compromise, DNA Replication, Recombination, and Repair	disintegration of genomes	0.108	IRF2	1
Cellular Response to Therapeutics	drug resistance of lung cell lines	0.108	ABCB1	1
Cell Cycle, Cellular Assembly and Organization, DNA Replication, Recombination, and Repair	duplication of spindle pole bodies	0.108	CETN3	1
