# Supplementary material for: A general calculus of fitness landscapes finds genes under selection in cancers
Source: HighWire-hosted journal article supplement (doi:10.1101/gr.275811.121), 2022-03-17
Supplement: Supplemental_Table_S11.xlsx [file Supplemental_Table_S11.xlsx]

## Sheet: Table_S11
Table S11. Gold-standard tumor suppressor oncogene
Gene	Literature annotation	most significant cancer	sLOF	sGOF	Source
ACVR1B	tumor suppressor	PAN	0.40903	0.10454	Davoli et al., 2013; Vogelstein et al., 2013
SMAD4	tumor suppressor	PAN	0.59407	0.03791	Davoli et al., 2013; Vogelstein et al., 2013
ATM	tumor suppressor	PAN	0.33211	0.02589	Davoli et al., 2013; Vogelstein et al., 2013
CREBBP	tumor suppressor	PAN	0.26764	-0.00978	Davoli et al., 2013; Vogelstein et al., 2013
FBXW7	tumor suppressor	PAN	0.58928	-0.01591	Davoli et al., 2013; Vogelstein et al., 2013
BAP1	tumor suppressor	PAN	0.41521	-0.04399	Davoli et al., 2013; Vogelstein et al., 2013
GATA3	tumor suppressor	BRCA	0.57234	-0.04795	Davoli et al., 2013; Vogelstein et al., 2013
SETD2	tumor suppressor	PAN	0.43331	-0.05442	Davoli et al., 2013; Vogelstein et al., 2013
EP300	tumor suppressor	PAN	0.36589	-0.05502	Davoli et al., 2013; Vogelstein et al., 2013
CASP8	tumor suppressor	PAN	0.56773	-0.05569	Davoli et al., 2013; Vogelstein et al., 2013
STAG2	tumor suppressor	PAN	0.23836	-0.06119	Davoli et al., 2013; Vogelstein et al., 2013
ARID1B	tumor suppressor	PAN	0.20789	-0.06549	Davoli et al., 2013; Vogelstein et al., 2013
SMARCA4	tumor suppressor	PAN	0.23348	-0.07824	Davoli et al., 2013; Vogelstein et al., 2013
RNF43	tumor suppressor	PAN	0.18704	-0.08374	Davoli et al., 2013; Vogelstein et al., 2013
TP53	tumor suppressor	PAN	0.72918	-0.08968	Davoli et al., 2013; Vogelstein et al., 2013
B2M	tumor suppressor	PAN	0.30278	-0.09097	Davoli et al., 2013; Vogelstein et al., 2013
MLH1	tumor suppressor	PAN	0.18672	-0.09622	Davoli et al., 2013; Vogelstein et al., 2013
VHL	tumor suppressor	KIRC	0.69552	-0.09632	Davoli et al., 2013; Vogelstein et al., 2013
MEN1	tumor suppressor	PAN	0.16428	-0.09995	Davoli et al., 2013; Vogelstein et al., 2013
PIK3R1	tumor suppressor	PAN	0.48732	-0.1021	Davoli et al., 2013; Vogelstein et al., 2013
BCOR	tumor suppressor	COAD	0.45341	-0.10771	Davoli et al., 2013; Vogelstein et al., 2013
ARID2	tumor suppressor	PAN	0.39952	-0.11166	Davoli et al., 2013; Vogelstein et al., 2013
SMAD2	tumor suppressor	PAN	0.44611	-0.11712	Davoli et al., 2013; Vogelstein et al., 2013
NF2	tumor suppressor	PAN	0.30956	-0.1442	Davoli et al., 2013; Vogelstein et al., 2013
PTEN	tumor suppressor	PAN	0.72113	-0.14669	Davoli et al., 2013; Vogelstein et al., 2013
NF1	tumor suppressor	PAN	0.37768	-0.14773	Davoli et al., 2013; Vogelstein et al., 2013
PBRM1	tumor suppressor	PAN	0.55594	-0.19078	Davoli et al., 2013; Vogelstein et al., 2013
ATRX	tumor suppressor	LGG	0.74802	-0.21125	Davoli et al., 2013; Vogelstein et al., 2013
ARID1A	tumor suppressor	PAN	0.54084	-0.23061	Davoli et al., 2013; Vogelstein et al., 2013
RB1	tumor suppressor	PAN	0.50604	-0.23587	Davoli et al., 2013; Vogelstein et al., 2013
STK11	tumor suppressor	PAN	0.49671	-0.24686	Davoli et al., 2013; Vogelstein et al., 2013
CDKN2A	tumor suppressor	PAN	0.7271	-0.25054	Davoli et al., 2013; Vogelstein et al., 2013
CDH1	tumor suppressor	BRCA	0.72985	-0.3082	Davoli et al., 2013; Vogelstein et al., 2013
APC	tumor suppressor	PAN	0.64594	-0.31325	Davoli et al., 2013; Vogelstein et al., 2013
CYLD	tumor suppressor	HNSC	0.66587	-0.3937	Davoli et al., 2013; Vogelstein et al., 2013
KDM6A	tumor suppressor	BLCA	0.80345	-0.48186	Davoli et al., 2013; Vogelstein et al., 2013
FUBP1	tumor suppressor	LGG	0.63906	-0.49605	Davoli et al., 2013; Vogelstein et al., 2013
KDM5C	tumor suppressor	KIRC	0.8388	-0.52329	Davoli et al., 2013; Vogelstein et al., 2013
TET2	tumor suppressor	LAML	0.91772	-0.53475	Davoli et al., 2013; Vogelstein et al., 2013
BRCA1	tumor suppressor	OV	0.92117	-0.54879	Davoli et al., 2013; Vogelstein et al., 2013
ASXL1	tumor suppressor	LAML	1	-1	Davoli et al., 2013; Vogelstein et al., 2013
DNMT3A	tumor suppressor	LAML	0.59464	0.34631	COSMIC Cancer Gene Census
KEAP1	tumor suppressor	PAN	0.35133	0.18893	COSMIC Cancer Gene Census
LZTR1	tumor suppressor	PAN	0.29926	0.13122	COSMIC Cancer Gene Census
DDX3X	tumor suppressor	SKCM	0.47295	0.06293	COSMIC Cancer Gene Census
CDK12	tumor suppressor	PAN	0.2151	0.05308	COSMIC Cancer Gene Census
CNOT3	tumor suppressor	PAN	0.16789	0.04025	COSMIC Cancer Gene Census
TGFBR2	tumor suppressor	PAN	0.38047	-0.1386	COSMIC Cancer Gene Census
ZFHX3	tumor suppressor	BRCA	0.30842	-0.14875	COSMIC Cancer Gene Census
CEBPA	tumor suppressor	LAML	0.81162	-0.18366	COSMIC Cancer Gene Census
CTCF	tumor suppressor	UCEC	0.73264	-0.20406	COSMIC Cancer Gene Census
CDKN1B	tumor suppressor	PAN	0.44725	-0.23221	COSMIC Cancer Gene Census
RBM10	tumor suppressor	LUAD	0.71358	-0.27177	COSMIC Cancer Gene Census
FAT1	tumor suppressor	HNSC	0.69299	-0.37109	COSMIC Cancer Gene Census
NRAS	oncogene	PAN	0.37959	0.76502	Davoli et al., 2013; Vogelstein et al., 2013
PIK3CA	oncogene	PAN	0.22464	0.6136	Davoli et al., 2013; Vogelstein et al., 2013
KRAS	oncogene	PAN	0.44442	0.60101	Davoli et al., 2013; Vogelstein et al., 2013
HRAS	oncogene	PAN	0.39317	0.55533	Davoli et al., 2013; Vogelstein et al., 2013
BRAF	oncogene	PAN	0.54226	0.41079	Davoli et al., 2013; Vogelstein et al., 2013
IDH1	oncogene	PAN	0.58695	0.32282	Davoli et al., 2013; Vogelstein et al., 2013
EGFR	oncogene	GBM	0.46722	0.31157	Davoli et al., 2013; Vogelstein et al., 2013
NFE2L2	oncogene	PAN	0.48804	0.29592	Davoli et al., 2013; Vogelstein et al., 2013
SF3B1	oncogene	BRCA	0.50625	0.27811	Davoli et al., 2013; Vogelstein et al., 2013
CTNNB1	oncogene	PAN	0.43733	0.23782	Davoli et al., 2013; Vogelstein et al., 2013
FGFR2	oncogene	UCEC	0.43732	0.16263	Davoli et al., 2013; Vogelstein et al., 2013
GNAS	oncogene	PAN	0.25871	0.12327	Davoli et al., 2013; Vogelstein et al., 2013
U2AF1	oncogene	PAN	0.47	-0.02106	Davoli et al., 2013; Vogelstein et al., 2013
RAC1	oncogene	PAN	0.41464	0.3895	COSMIC Cancer Gene Census
IDH2	oncogene	PAN	0.45868	0.38478	COSMIC Cancer Gene Census
MAPK1	oncogene	PAN	0.40867	0.13692	COSMIC Cancer Gene Census
MTOR	oncogene	KIRC	0.46491	0.05879	COSMIC Cancer Gene Census
CHD4	oncogene	PAN	0.21815	-0.01152	COSMIC Cancer Gene Census
