# Supplementary material for: A general calculus of fitness landscapes finds genes under selection in cancers
Source: HighWire-hosted journal article supplement (doi:10.1101/gr.275811.121), 2022-03-17
Supplement: Supplemental_Table_S12.xlsx [file Supplemental_Table_S12.xlsx]

## Sheet: Table_S12
Table S12. Avana CRISPR screen data
DepMap_CellLine	Disease	Gene	Gene_class	Mut_class	Ceres Score
CH157MN_CENTRAL_NERVOUS_SYSTEM	Meningioma	NRAS	COSMIC	Moderate EA	-1.00496
U178_CENTRAL_NERVOUS_SYSTEM	Brain Cancer	RAC1	COSMIC	Moderate EA	-0.484709
SKHEP1_LIVER	Liver Cancer	BRAF	COSMIC	Moderate EA	-0.459025
PATU8988S_PANCREAS	Pancreatic Cancer	PREX2	COSMIC	Moderate EA	0.0720839
PECAPJ34CLONEC12_UPPER_AERODIGESTIVE_TRACT	Head and Neck Cancer	ALK	COSMIC	Moderate EA	-0.000938674
PECAPJ34CLONEC12_UPPER_AERODIGESTIVE_TRACT	Head and Neck Cancer	TRRAP	COSMIC	Moderate EA	-1.03704
HT1080_SOFT_TISSUE	Soft Tissue Sarcoma	NRAS	COSMIC	Moderate EA	-0.97121
SNU840_OVARY	Ovarian Cancer	PIK3CA	COSMIC	Moderate EA	-0.734335
COGE352_BONE	Ewing\'s Sarcoma	HIF1A	COSMIC	Moderate EA	0.289622
PANC0203_PANCREAS	Pancreatic Cancer	KRAS	COSMIC	Moderate EA	-1.39817
BC3C_URINARY_TRACT	Bladder Cancer	PIK3CA	COSMIC	Moderate EA	-1.04158
INA6_HAEMATOPOIETIC_AND_LYMPHOID_TISSUE	Multiple Myeloma	NRAS	COSMIC	Moderate EA	-0.932129
CHP212_AUTONOMIC_GANGLIA	Neuroblastoma/Brain Cancer	NRAS	COSMIC	Moderate EA	-0.775222
SF767_CENTRAL_NERVOUS_SYSTEM	Brain Cancer	PIK3CA	COSMIC	Moderate EA	-0.810564
RERFLCAI_LUNG	Lung NSCLC	PREX2	COSMIC	Moderate EA	0.195365
RERFLCAI_LUNG	Lung NSCLC	COL2A1	COSMIC	Moderate EA	-0.0660942
HS683_CENTRAL_NERVOUS_SYSTEM	GBM/Brain Cancer	MTOR	COSMIC	Moderate EA	-1.24713
SNU8_OVARY	Ovarian Cancer	KRAS	COSMIC	Moderate EA	-1.23912
PANC1005_PANCREAS	Pancreatic Cancer	PREX2	COSMIC	Moderate EA	0.26586
PANC1005_PANCREAS	Pancreatic Cancer	KRAS	COSMIC	Moderate EA	-1.04838
CHLA15_AUTONOMIC_GANGLIA	Neuroblastoma	ALK	COSMIC	Moderate EA	-1.0725
697_HAEMATOPOIETIC_AND_LYMPHOID_TISSUE	Leukemia	COL2A1	COSMIC	Moderate EA	0.129268
697_HAEMATOPOIETIC_AND_LYMPHOID_TISSUE	Leukemia	NRAS	COSMIC	Moderate EA	-0.777333
NCIH747_LARGE_INTESTINE	Colon Cancer	KRAS	COSMIC	Moderate EA	-1.07398
OV7_OVARY	Ovarian Cancer	KRAS	COSMIC	Moderate EA	-1.58348
SMSCTR_SOFT_TISSUE	Rhabdomyosarcoma	COL2A1	COSMIC	Moderate EA	0.201254
MHHNB11_AUTONOMIC_GANGLIA	Neuroblastoma	CARD11	COSMIC	Moderate EA	-0.353569
DKMG_CENTRAL_NERVOUS_SYSTEM	Brain Cancer	PIK3CA	COSMIC	Moderate EA	-0.56471
CAKI1_KIDNEY	Kidney Cancer	MET	COSMIC	Moderate EA	0.222289
COGN305_AUTONOMIC_GANGLIA	Neuroblastoma	COL2A1	COSMIC	Moderate EA	0.200928
JR_SOFT_TISSUE	Rhabdomyosarcoma	HRAS	COSMIC	Moderate EA	-0.537208
HS578T_BREAST	Breast Cancer	HRAS	COSMIC	Moderate EA	-0.559368
HS578T_BREAST	Breast Cancer	TRRAP	COSMIC	Moderate EA	-1.06599
KPL1_BREAST	Breast Cancer	PIK3CA	COSMIC	Moderate EA	-0.546919
KLE_ENDOMETRIUM	Endometrial Cancer	ALK	COSMIC	Moderate EA	-0.349151
SKNAS_AUTONOMIC_GANGLIA	Neuroblastoma	NRAS	COSMIC	Moderate EA	-0.999699
JIMT1_BREAST	Breast Cancer	PIK3CA	COSMIC	Moderate EA	-0.586393
D283MED_CENTRAL_NERVOUS_SYSTEM	Medulloblastoma/ Brain Cancer	TRRAP	COSMIC	Moderate EA	-1.21555
D283MED_CENTRAL_NERVOUS_SYSTEM	Medulloblastoma/ Brain Cancer	KIT	COSMIC	Moderate EA	-0.0243099
BT549_BREAST	Breast Cancer	USP8	COSMIC	Moderate EA	-0.643042
CAL29_URINARY_TRACT	Bladder Cancer	PIK3CA	COSMIC	Moderate EA	-1.09574
TCCPAN2_PANCREAS	Pancreatic Cancer	KRAS	COSMIC	Moderate EA	-1.05531
HS766T_PANCREAS	Pancreatic Cancer	MYD88	COSMIC	Moderate EA	-0.0823314
HS766T_PANCREAS	Pancreatic Cancer	KRAS	COSMIC	Moderate EA	-0.913304
SKBR3_BREAST	Breast Cancer	ERBB3	COSMIC	Moderate EA	-0.946696
T3M4_PANCREAS	Pancreatic Cancer	KRAS	COSMIC	Moderate EA	-0.66644
DETROIT562_UPPER_AERODIGESTIVE_TRACT	Head and Neck Cancer	PIK3CA	COSMIC	Moderate EA	-0.832243
HUPT3_PANCREAS	Pancreatic Cancer	KRAS	COSMIC	Moderate EA	-0.404737
CJM_SKIN	Skin Cancer	HRAS	COSMIC	Moderate EA	-0.781283
HT1197_URINARY_TRACT	Bladder Cancer	PIK3CA	COSMIC	Moderate EA	-0.757394
HT1197_URINARY_TRACT	Bladder Cancer	NRAS	COSMIC	Moderate EA	-0.556798
PANC0403_PANCREAS	Pancreatic Cancer	KRAS	COSMIC	Moderate EA	-1.23928
SW837_LARGE_INTESTINE	Colon Cancer	KRAS	COSMIC	Moderate EA	-1.01075
ASPC1_PANCREAS	Pancreatic Cancer	KRAS	COSMIC	Moderate EA	-1.3176
MALME3M_SKIN	Skin Cancer	BRAF	COSMIC	Moderate EA	-1.76428
UMUC1_URINARY_TRACT	Bladder Cancer	JAK2	COSMIC	Moderate EA	0.128606
PSN1_PANCREAS	Pancreatic Cancer	KRAS	COSMIC	Moderate EA	-1.33148
SR786_HAEMATOPOIETIC_AND_LYMPHOID_TISSUE	Lymphoma	CSF3R	COSMIC	Moderate EA	-0.33217
SR786_HAEMATOPOIETIC_AND_LYMPHOID_TISSUE	Lymphoma	TRRAP	COSMIC	Moderate EA	-1.54607
HCC1143_BREAST	Breast Cancer	BCL6	COSMIC	Moderate EA	0.0020694
PK1_PANCREAS	Pancreatic Cancer	KRAS	COSMIC	Moderate EA	-1.04379
KMRC20_KIDNEY	Kidney Cancer	MTOR	COSMIC	Moderate EA	-1.06014
NOMO1_HAEMATOPOIETIC_AND_LYMPHOID_TISSUE	Leukemia	KRAS	COSMIC	Moderate EA	-0.947338
CALU6_LUNG	Lung NSCLC	KRAS	COSMIC	Moderate EA	-1.36176
EFM19_BREAST	Breast Cancer	PIK3CA	COSMIC	Moderate EA	-0.774883
RT112_URINARY_TRACT	Bladder Cancer	PIK3CA	COSMIC	Moderate EA	-0.2726
CORL47_LUNG	Lung SCLC	FLT3	COSMIC	Moderate EA	-0.373309
CORL47_LUNG	Lung SCLC	CACNA1D	COSMIC	Moderate EA	-0.043623
HEYA8_OVARY	Ovarian Cancer	CSF3R	COSMIC	Moderate EA	-0.112367
HEYA8_OVARY	Ovarian Cancer	KRAS	COSMIC	Moderate EA	-0.888794
TUHR14TKB_KIDNEY	Kidney Cancer	ERBB2	COSMIC	Moderate EA	-0.449715
THP1_HAEMATOPOIETIC_AND_LYMPHOID_TISSUE	Leukemia	NRAS	COSMIC	Moderate EA	-1.25079
COLO201_LARGE_INTESTINE	Colon Cancer	MTOR	COSMIC	Moderate EA	-1.06293
COLO201_LARGE_INTESTINE	Colon Cancer	BRAF	COSMIC	Moderate EA	-0.896512
COLO201_LARGE_INTESTINE	Colon Cancer	MET	COSMIC	Moderate EA	0.166338
HT144_SKIN	Skin Cancer	BRAF	COSMIC	Moderate EA	-1.04855
HT144_SKIN	Skin Cancer	PDGFRA	COSMIC	Moderate EA	-0.250355
KP3_PANCREAS	Pancreatic Cancer	FLT3	COSMIC	Moderate EA	-0.134516
NCIH2122_LUNG	Lung NSCLC	KRAS	COSMIC	Moderate EA	-0.807784
SNU398_LIVER	Liver Cancer	CTNNB1	COSMIC	Moderate EA	-1.00635
KP4_PANCREAS	Pancreatic Cancer	KRAS	COSMIC	Moderate EA	-1.017
KNS81_CENTRAL_NERVOUS_SYSTEM	Brain Cancer	CHD4	COSMIC	Moderate EA	-0.98772
LMSU_STOMACH	Gastric Cancer	CACNA1D	COSMIC	Moderate EA	-0.0208728
LMSU_STOMACH	Gastric Cancer	KIT	COSMIC	Moderate EA	-0.199237
RPMI7951_SKIN	Skin Cancer	BRAF	COSMIC	Moderate EA	-0.432768
CORL279_LUNG	Lung SCLC	ERBB3	COSMIC	Moderate EA	-0.0212316
CORL279_LUNG	Lung SCLC	NRAS	COSMIC	Moderate EA	-0.0938183
DU4475_BREAST	Breast Cancer	BRAF	COSMIC	Moderate EA	-1.27359
RD_SOFT_TISSUE	Rhabdomyosarcoma	NRAS	COSMIC	Moderate EA	-1.25596
BICR56_UPPER_AERODIGESTIVE_TRACT	Head and Neck Cancer	CALR	COSMIC	Moderate EA	-0.184704
SNU410_PANCREAS	Pancreatic Cancer	MTOR	COSMIC	Moderate EA	-1.17796
SNU410_PANCREAS	Pancreatic Cancer	KIT	COSMIC	Moderate EA	-0.0956871
SNU410_PANCREAS	Pancreatic Cancer	KRAS	COSMIC	Moderate EA	-1.33226
NCIH1792_LUNG	Lung NSCLC	KRAS	COSMIC	Moderate EA	-1.16026
SF172_CENTRAL_NERVOUS_SYSTEM	Brain Cancer	TRRAP	COSMIC	Moderate EA	-1.1703
K029AX_SKIN	Skin Cancer	BRAF	COSMIC	Moderate EA	-0.664909
CAL33_UPPER_AERODIGESTIVE_TRACT	Head and Neck Cancer	PIK3CA	COSMIC	Moderate EA	-0.790191
KALS1_CENTRAL_NERVOUS_SYSTEM	Brain Cancer	MTOR	COSMIC	Moderate EA	-1.0734
KNS60_CENTRAL_NERVOUS_SYSTEM	Brain Cancer	ABL1	COSMIC	Moderate EA	0.187227
253J_URINARY_TRACT	Bladder Cancer	PIK3CA	COSMIC	Moderate EA	-0.796848
253J_URINARY_TRACT	Bladder Cancer	MPL	COSMIC	Moderate EA	0.0386712
SJSA1_BONE	Bone Cancer	NRAS	COSMIC	Moderate EA	-0.127124
SJSA1_BONE	Bone Cancer	KRAS	COSMIC	Moderate EA	-0.601138
TEN_ENDOMETRIUM	Endometrial Cancer	MTOR	COSMIC	Moderate EA	-1.14744
TEN_ENDOMETRIUM	Endometrial Cancer	KRAS	COSMIC	Moderate EA	-0.419567
KP2_PANCREAS	Pancreatic Cancer	KRAS	COSMIC	Moderate EA	-1.01833
SYO1_SOFT_TISSUE	Soft Tissue Cancer	NRAS	COSMIC	Moderate EA	-0.0337907
C32_SKIN	Skin Cancer	MTOR	COSMIC	Moderate EA	-0.987547
C32_SKIN	Skin Cancer	BRAF	COSMIC	Moderate EA	-0.818672
JJN3_HAEMATOPOIETIC_AND_LYMPHOID_TISSUE	Multiple Myeloma/Leukemia, Plasma Cell	CTNNB1	COSMIC	Moderate EA	-0.054992
JJN3_HAEMATOPOIETIC_AND_LYMPHOID_TISSUE	Multiple Myeloma/Leukemia, Plasma Cell	NRAS	COSMIC	Moderate EA	-0.854013
JHOS2_OVARY	Ovarian Cancer	CACNA1D	COSMIC	Moderate EA	0.0992022
CL40_LARGE_INTESTINE	Colon Cancer	KRAS	COSMIC	Moderate EA	-1.36425
TE8_OESOPHAGUS	Esophageal Cancer	PPM1D	COSMIC	Moderate EA	-0.0190504
SNU449_LIVER	Liver Cancer	CACNA1D	COSMIC	Moderate EA	0.00383614
NCIN87_STOMACH	Gastric Cancer	ERBB2	COSMIC	Moderate EA	-0.855855
MYLA_HAEMATOPOIETIC_AND_LYMPHOID_TISSUE	Lymphoma	XPO1	COSMIC	Moderate EA	-1.272
BFTC909_KIDNEY	Kidney Cancer	PIK3CA	COSMIC	Moderate EA	-0.617639
C2BBE1_LARGE_INTESTINE	Colon Cancer	ERBB3	COSMIC	Moderate EA	-0.0743695
C2BBE1_LARGE_INTESTINE	Colon Cancer	CTNNB1	COSMIC	Moderate EA	-0.636163
C2BBE1_LARGE_INTESTINE	Colon Cancer	GATA2	COSMIC	Moderate EA	0.194249
MIAPACA2_PANCREAS	Pancreatic Cancer	KRAS	COSMIC	Moderate EA	-1.2098
GSU_STOMACH	Gastric Cancer	ABL1	COSMIC	Moderate EA	-0.274672
GSU_STOMACH	Gastric Cancer	CSF3R	COSMIC	Moderate EA	-0.188143
GSU_STOMACH	Gastric Cancer	KRAS	COSMIC	Moderate EA	-1.00043
KARPAS422_HAEMATOPOIETIC_AND_LYMPHOID_TISSUE	Lymphoma	CARD11	COSMIC	Moderate EA	-0.264966
HCC1806_BREAST	Breast Cancer	PREX2	COSMIC	Moderate EA	0.0782011
UMUC3_URINARY_TRACT	Bladder Cancer	KRAS	COSMIC	Moderate EA	-1.05302
OVISE_OVARY	Ovarian Cancer	PPM1D	COSMIC	Moderate EA	-0.17094
OVISE_OVARY	Ovarian Cancer	PIK3CA	COSMIC	Moderate EA	-0.67899
8305C_THYROID	Thyroid Cancer	BRAF	COSMIC	Moderate EA	-1.0015
MELHO_SKIN	Skin Cancer	BRAF	COSMIC	Moderate EA	-1.09994
MELHO_SKIN	Skin Cancer	USP8	COSMIC	Moderate EA	-0.535474
DB_HAEMATOPOIETIC_AND_LYMPHOID_TISSUE	Lymphoma	PREX2	COSMIC	Moderate EA	0.248634
KU1919_URINARY_TRACT	Bladder Cancer	BCL6	COSMIC	Moderate EA	-0.142092
KU1919_URINARY_TRACT	Bladder Cancer	AKT1	COSMIC	Moderate EA	0.0999937
KU1919_URINARY_TRACT	Bladder Cancer	NRAS	COSMIC	Moderate EA	-0.872991
COLO800_SKIN	Skin Cancer	BRAF	COSMIC	Moderate EA	-0.831934
OUMS23_LARGE_INTESTINE	Colon Cancer	BRAF	COSMIC	Moderate EA	-0.426984
WM983B_SKIN	Skin Cancer	BRAF	COSMIC	Moderate EA	-1.27924
WM983B_SKIN	Skin Cancer	BCL6	COSMIC	Moderate EA	-0.160012
TCCSUP_URINARY_TRACT	Bladder Cancer	CHD4	COSMIC	Moderate EA	-1.06148
TCCSUP_URINARY_TRACT	Bladder Cancer	PIK3CA	COSMIC	Moderate EA	-0.722348
TF1_HAEMATOPOIETIC_AND_LYMPHOID_TISSUE	Leukemia	ERBB3	COSMIC	Moderate EA	-0.0910289
TF1_HAEMATOPOIETIC_AND_LYMPHOID_TISSUE	Leukemia	NRAS	COSMIC	Moderate EA	-0.395305
NCIH2030_LUNG	Lung NSCLC	KRAS	COSMIC	Moderate EA	-0.982606
LS1034_LARGE_INTESTINE	Colon Cancer	KRAS	COSMIC	Moderate EA	-0.806623
HS944T_SKIN	Skin Cancer	CACNA1D	COSMIC	Moderate EA	0.0749827
HS944T_SKIN	Skin Cancer	NRAS	COSMIC	Moderate EA	-1.1846
OVTOKO_OVARY	Ovarian Cancer	COL2A1	COSMIC	Moderate EA	-0.0155366
OVTOKO_OVARY	Ovarian Cancer	ALK	COSMIC	Moderate EA	-0.280478
OVCAR8_OVARY	Ovarian Cancer	CTNNB1	COSMIC	Moderate EA	-0.0256412
MDAMB436_BREAST	Breast Cancer	ABL1	COSMIC	Moderate EA	-0.0363019
LU99_LUNG	Lung NSCLC	PIK3CA	COSMIC	Moderate EA	-0.463263
LU99_LUNG	Lung NSCLC	KRAS	COSMIC	Moderate EA	-0.993961
RERFLCAD1_LUNG	Lung NSCLC	BRAF	COSMIC	Moderate EA	-0.074198
RERFLCAD1_LUNG	Lung NSCLC	KRAS	COSMIC	Moderate EA	-1.12064
UACC62_SKIN	Skin Cancer	BRAF	COSMIC	Moderate EA	-1.24794
HCC1954_BREAST	Breast Cancer	COL2A1	COSMIC	Moderate EA	-0.0484226
HCC1954_BREAST	Breast Cancer	PIK3CA	COSMIC	Moderate EA	-0.567164
T84_LARGE_INTESTINE	Colon Cancer	RET	COSMIC	Moderate EA	-0.224157
T84_LARGE_INTESTINE	Colon Cancer	PIK3CA	COSMIC	Moderate EA	-0.702315
T84_LARGE_INTESTINE	Colon Cancer	KRAS	COSMIC	Moderate EA	-0.906031
KMS20_HAEMATOPOIETIC_AND_LYMPHOID_TISSUE	Multiple Myeloma	AKT1	COSMIC	Moderate EA	-0.190976
KMS20_HAEMATOPOIETIC_AND_LYMPHOID_TISSUE	Multiple Myeloma	KRAS	COSMIC	Moderate EA	-0.928438
WM1799_SKIN	Skin Cancer	BRAF	COSMIC	Moderate EA	-0.976231
WM1799_SKIN	Skin Cancer	CTNNB1	COSMIC	Moderate EA	-0.32802
OVMANA_OVARY	Ovarian Cancer	STAT3	COSMIC	Moderate EA	-0.0903832
YKG1_CENTRAL_NERVOUS_SYSTEM	Brain Cancer	PIK3CA	COSMIC	Moderate EA	-0.233724
NCIH460_LUNG	Lung NSCLC	MAP2K1	COSMIC	Moderate EA	0.0448781
NCIH460_LUNG	Lung NSCLC	PIK3CA	COSMIC	Moderate EA	-0.346741
NCIH460_LUNG	Lung NSCLC	KRAS	COSMIC	Moderate EA	-0.987446
COLO678_LARGE_INTESTINE	Colon Cancer	KRAS	COSMIC	Moderate EA	-0.93222
RVH421_SKIN	Skin Cancer	BRAF	COSMIC	Moderate EA	-1.27113
RVH421_SKIN	Skin Cancer	HIF1A	COSMIC	Moderate EA	0.0516668
SW1463_LARGE_INTESTINE	Colon Cancer	KRAS	COSMIC	Moderate EA	-0.952948
SW403_LARGE_INTESTINE	Colon Cancer	CHD4	COSMIC	Moderate EA	-1.57537
LS513_LARGE_INTESTINE	Colon Cancer	USP8	COSMIC	Moderate EA	-0.65849
LS513_LARGE_INTESTINE	Colon Cancer	KRAS	COSMIC	Moderate EA	-1.11023
SUIT2_PANCREAS	Pancreatic Cancer	COL2A1	COSMIC	Moderate EA	-0.112016
SUIT2_PANCREAS	Pancreatic Cancer	MET	COSMIC	Moderate EA	0.0683266
SUIT2_PANCREAS	Pancreatic Cancer	KRAS	COSMIC	Moderate EA	-1.22384
PK45H_PANCREAS	Pancreatic Cancer	KRAS	COSMIC	Moderate EA	-1.43085
HCC56_LARGE_INTESTINE	Colon Cancer	PPM1D	COSMIC	Moderate EA	0.115825
NCIH716_LARGE_INTESTINE	Colon Cancer	KRAS	COSMIC	Moderate EA	-0.755951
WM2664_SKIN	Skin Cancer	BRAF	COSMIC	Moderate EA	-1.00817
WM115_SKIN	Skin Cancer	BRAF	COSMIC	Moderate EA	-1.10529
KMS27_HAEMATOPOIETIC_AND_LYMPHOID_TISSUE	Multiple Myeloma	NRAS	COSMIC	Moderate EA	-1.08123
HSC2_UPPER_AERODIGESTIVE_TRACT	Head and Neck Cancer	RAC1	COSMIC	Moderate EA	-0.367928
HSC2_UPPER_AERODIGESTIVE_TRACT	Head and Neck Cancer	CTNNB1	COSMIC	Moderate EA	-0.0263994
HSC2_UPPER_AERODIGESTIVE_TRACT	Head and Neck Cancer	PPM1D	COSMIC	Moderate EA	-0.00134434
HSC2_UPPER_AERODIGESTIVE_TRACT	Head and Neck Cancer	PIK3CA	COSMIC	Moderate EA	-0.907493
HT29_LARGE_INTESTINE	Colon Cancer	BRAF	COSMIC	Moderate EA	-0.887585
HT29_LARGE_INTESTINE	Colon Cancer	USP8	COSMIC	Moderate EA	-0.714007
HT29_LARGE_INTESTINE	Colon Cancer	PIK3CA	COSMIC	Moderate EA	-0.735684
IGR39_SKIN	Skin Cancer	BRAF	COSMIC	Moderate EA	-0.784058
MDAMB231_BREAST	Breast Cancer	KRAS	COSMIC	Moderate EA	-0.996336
MM1S_HAEMATOPOIETIC_AND_LYMPHOID_TISSUE	Multiple Myeloma	KRAS	COSMIC	Moderate EA	-1.044
MDAMB468_BREAST	Breast Cancer	CACNA1D	COSMIC	Moderate EA	-0.00234456
MCAS_OVARY	Ovarian Cancer	PIK3CA	COSMIC	Moderate EA	-0.854328
MCAS_OVARY	Ovarian Cancer	KRAS	COSMIC	Moderate EA	-1.23802
KE39_STOMACH	Gastric Cancer	CTNNB1	COSMIC	Moderate EA	-0.841396
KE39_STOMACH	Gastric Cancer	DDR2	COSMIC	Moderate EA	0.0715114
GI1_CENTRAL_NERVOUS_SYSTEM	Brain Cancer	ABL1	COSMIC	Moderate EA	-0.094267
NCIH1299_LUNG	Lung NSCLC	PREX2	COSMIC	Moderate EA	0.141933
NCIH1299_LUNG	Lung NSCLC	NRAS	COSMIC	Moderate EA	-0.729497
UACC257_SKIN	Skin Cancer	BRAF	COSMIC	Moderate EA	-1.02114
NCIH1944_LUNG	Lung NSCLC	KRAS	COSMIC	Moderate EA	-0.710858
HCC1359_LUNG	Lung NSCLC	ALK	COSMIC	Moderate EA	-0.105539
HSC3_UPPER_AERODIGESTIVE_TRACT	Head and Neck Cancer	ABL1	COSMIC	Moderate EA	-0.259479
HSC3_UPPER_AERODIGESTIVE_TRACT	Head and Neck Cancer	CACNA1D	COSMIC	Moderate EA	-0.00306917
647V_URINARY_TRACT	Bladder Cancer	CACNA1D	COSMIC	Moderate EA	-0.0463021
MDAMB157_BREAST	Breast Cancer	RAC1	COSMIC	Moderate EA	-1.15354
HCC202_BREAST	Breast Cancer	PIK3CA	COSMIC	Moderate EA	-0.815743
WM793_SKIN	Skin Cancer	CDK4	COSMIC	Moderate EA	-1.08823
WM793_SKIN	Skin Cancer	BRAF	COSMIC	Moderate EA	-0.981121
TE1_OESOPHAGUS	Esophageal Cancer	PREX2	COSMIC	Moderate EA	0.0846107
TE5_OESOPHAGUS	Esophageal Cancer	ALK	COSMIC	Moderate EA	-0.29392
TE5_OESOPHAGUS	Esophageal Cancer	PPM1D	COSMIC	Moderate EA	0.159676
TE5_OESOPHAGUS	Esophageal Cancer	PIK3CA	COSMIC	Moderate EA	-0.294865
FADU_UPPER_AERODIGESTIVE_TRACT	Head and Neck Cancer	ERBB3	COSMIC	Moderate EA	-0.213368
GB1_CENTRAL_NERVOUS_SYSTEM	Brain Cancer	HIF1A	COSMIC	Moderate EA	0.0896886
LXF289_LUNG	Lung NSCLC	CTNNB1	COSMIC	Moderate EA	-0.445409
HOP62_LUNG	Lung NSCLC	KRAS	COSMIC	Moderate EA	-0.918806
HS695T_SKIN	Skin Cancer	BRAF	COSMIC	Moderate EA	-1.05294
RPMI8226_HAEMATOPOIETIC_AND_LYMPHOID_TISSUE	Multiple Myeloma	KRAS	COSMIC	Moderate EA	-0.961563
EJM_HAEMATOPOIETIC_AND_LYMPHOID_TISSUE	Multiple Myeloma	RAC1	COSMIC	Moderate EA	-0.0618752
EJM_HAEMATOPOIETIC_AND_LYMPHOID_TISSUE	Multiple Myeloma	BCL6	COSMIC	Moderate EA	0.143288
EJM_HAEMATOPOIETIC_AND_LYMPHOID_TISSUE	Multiple Myeloma	HIF1A	COSMIC	Moderate EA	-0.190677
SKMEL24_SKIN	Skin Cancer	BRAF	COSMIC	Moderate EA	-0.676921
SKMEL24_SKIN	Skin Cancer	COL2A1	COSMIC	Moderate EA	0.00694854
VMCUB1_URINARY_TRACT	Bladder Cancer	TRRAP	COSMIC	Moderate EA	-1.35043
VMCUB1_URINARY_TRACT	Bladder Cancer	PIK3CA	COSMIC	Moderate EA	-0.627376
NCIH441_LUNG	Lung NSCLC	TRRAP	COSMIC	Moderate EA	-1.09844
NCIH441_LUNG	Lung NSCLC	DDR2	COSMIC	Moderate EA	0.0689329
A2780_OVARY	Ovarian Cancer	PIK3CA	COSMIC	Moderate EA	-0.485547
SKMEL30_SKIN	Skin Cancer	ALK	COSMIC	Moderate EA	-0.232556
SKMEL30_SKIN	Skin Cancer	NRAS	COSMIC	Moderate EA	-1.12396
A2058_SKIN	Skin Cancer	MAP2K1	COSMIC	Moderate EA	-0.322713
A2058_SKIN	Skin Cancer	BRAF	COSMIC	Moderate EA	-0.657052
A549_LUNG	Lung NSCLC	KRAS	COSMIC	Moderate EA	-0.812905
NCIH1648_LUNG	Lung NSCLC	USP8	COSMIC	Moderate EA	-0.801487
NCIH1648_LUNG	Lung NSCLC	CACNA1D	COSMIC	Moderate EA	-0.0414563
HEC50B_ENDOMETRIUM	Endometrial Cancer	KRAS	COSMIC	Moderate EA	-0.543131
KMBC2_URINARY_TRACT	Bladder Cancer	BRAF	COSMIC	Moderate EA	-0.201138
KMBC2_URINARY_TRACT	Bladder Cancer	PDGFRA	COSMIC	Moderate EA	-0.0623475
AU565_BREAST	Breast Cancer	ERBB3	COSMIC	Moderate EA	-0.796976
NCIH2291_LUNG	Lung NSCLC	CARD11	COSMIC	Moderate EA	-0.127678
KNS62_LUNG	Lung NSCLC	HRAS	COSMIC	Moderate EA	-0.388581
SW982_SOFT_TISSUE	Soft Tissue Cancer	MTOR	COSMIC	Moderate EA	-1.43332
SW982_SOFT_TISSUE	Soft Tissue Cancer	BRAF	COSMIC	Moderate EA	-0.718763
ONS76_CENTRAL_NERVOUS_SYSTEM	Brain Cancer	NRAS	COSMIC	Moderate EA	-0.752088
ES2_OVARY	Ovarian Cancer	MAP2K1	COSMIC	Moderate EA	-0.681443
ES2_OVARY	Ovarian Cancer	CDK4	COSMIC	Moderate EA	-1.35421
ES2_OVARY	Ovarian Cancer	BRAF	COSMIC	Moderate EA	-0.760505
ES2_OVARY	Ovarian Cancer	TRRAP	COSMIC	Moderate EA	-1.29083
ES2_OVARY	Ovarian Cancer	CARD11	COSMIC	Moderate EA	-0.127534
SEM_HAEMATOPOIETIC_AND_LYMPHOID_TISSUE	Leukemia	CACNA1D	COSMIC	Moderate EA	0.125954
SEM_HAEMATOPOIETIC_AND_LYMPHOID_TISSUE	Leukemia	PIK3CA	COSMIC	Moderate EA	-0.446837
KIJK_HAEMATOPOIETIC_AND_LYMPHOID_TISSUE	Lymphoma	COL2A1	COSMIC	Moderate EA	0.180926
KIJK_HAEMATOPOIETIC_AND_LYMPHOID_TISSUE	Lymphoma	RET	COSMIC	Moderate EA	-0.277678
KYSE510_OESOPHAGUS	Esophageal Cancer	MTOR	COSMIC	Moderate EA	-0.880531
KYSE510_OESOPHAGUS	Esophageal Cancer	CXCR4	COSMIC	Moderate EA	0.0127292
KYSE510_OESOPHAGUS	Esophageal Cancer	PIK3CA	COSMIC	Moderate EA	-0.879138
MDAMB435S_SKIN	Skin Cancer	XPO1	COSMIC	Moderate EA	-1.19945
MDAMB435S_SKIN	Skin Cancer	BRAF	COSMIC	Moderate EA	-0.862427
MDAMB435S_SKIN	Skin Cancer	CARD11	COSMIC	Moderate EA	-0.238467
NCIH322_LUNG	Lung NSCLC	ALK	COSMIC	Moderate EA	-0.155987
NCIH2087_LUNG	Lung NSCLC	GATA2	COSMIC	Moderate EA	0.326503
NCIH2087_LUNG	Lung NSCLC	ALK	COSMIC	Moderate EA	0.114033
NCIH2087_LUNG	Lung NSCLC	NRAS	COSMIC	Moderate EA	-0.869749
COLO679_SKIN	Skin Cancer	BRAF	COSMIC	Moderate EA	-0.883168
COLO679_SKIN	Skin Cancer	PTPN11	COSMIC	Moderate EA	-0.134875
SKOV3_OVARY	Ovarian Cancer	PIK3CA	COSMIC	Moderate EA	-0.764254
HGC27_STOMACH	Gastric Cancer	PIK3CA	COSMIC	Moderate EA	-0.971187
MORCPR_LUNG	Lung NSCLC	KRAS	COSMIC	Moderate EA	-1.2617
KYSE450_OESOPHAGUS	Esophageal Cancer	HIF1A	COSMIC	Moderate EA	0.091367
MDAMB415_BREAST	Breast Cancer	ERBB3	COSMIC	Moderate EA	0.0111342
MDAMB415_BREAST	Breast Cancer	BRAF	COSMIC	Moderate EA	-0.126866
MDAMB415_BREAST	Breast Cancer	KIT	COSMIC	Moderate EA	-0.276063
GCT_SOFT_TISSUE	Soft Tissue/Bone Cancer	BRAF	COSMIC	Moderate EA	-0.790424
GCT_SOFT_TISSUE	Soft Tissue/Bone Cancer	COL2A1	COSMIC	Moderate EA	0.107054
AGS_STOMACH	Gastric Cancer	CACNA1D	COSMIC	Moderate EA	-0.128411
AGS_STOMACH	Gastric Cancer	TRRAP	COSMIC	Moderate EA	-1.08301
AGS_STOMACH	Gastric Cancer	PIK3CA	COSMIC	Moderate EA	-0.932994
AGS_STOMACH	Gastric Cancer	KRAS	COSMIC	Moderate EA	-0.834556
NCIH1568_LUNG	Lung NSCLC	MTOR	COSMIC	Moderate EA	-1.26785
KYSE270_OESOPHAGUS	Esophageal Cancer	BCL6	COSMIC	Moderate EA	-0.137606
KYSE270_OESOPHAGUS	Esophageal Cancer	COL2A1	COSMIC	Moderate EA	0.0655821
KYSE270_OESOPHAGUS	Esophageal Cancer	TRRAP	COSMIC	Moderate EA	-1.3857
KYSE30_OESOPHAGUS	Esophageal Cancer	HRAS	COSMIC	Moderate EA	-0.763052
KYSE30_OESOPHAGUS	Esophageal Cancer	AKT1	COSMIC	Moderate EA	0.0533412
HCC15_LUNG	Lung NSCLC	PREX2	COSMIC	Moderate EA	0.367637
HCC15_LUNG	Lung NSCLC	CTNNB1	COSMIC	Moderate EA	-0.101528
HCC15_LUNG	Lung NSCLC	MET	COSMIC	Moderate EA	0.130958
HCC15_LUNG	Lung NSCLC	NRAS	COSMIC	Moderate EA	-0.764675
MDST8_LARGE_INTESTINE	Colon Cancer	BRAF	COSMIC	Moderate EA	-0.782687
MDST8_LARGE_INTESTINE	Colon Cancer	COL2A1	COSMIC	Moderate EA	-0.129191
MDST8_LARGE_INTESTINE	Colon Cancer	ALK	COSMIC	Moderate EA	-0.228126
MDST8_LARGE_INTESTINE	Colon Cancer	CSF3R	COSMIC	Moderate EA	0.187091
MDST8_LARGE_INTESTINE	Colon Cancer	TRRAP	COSMIC	Moderate EA	-0.952627
CAL51_BREAST	Breast Cancer	RAC1	COSMIC	Moderate EA	-0.787136
CAL51_BREAST	Breast Cancer	ALK	COSMIC	Moderate EA	-0.0820043
CAL51_BREAST	Breast Cancer	CARD11	COSMIC	Moderate EA	0.0158873
CAL51_BREAST	Breast Cancer	PIK3CA	COSMIC	Moderate EA	-0.853994
HARA_LUNG	Lung NSCLC	TRRAP	COSMIC	Moderate EA	-1.25751
MDAMB453_BREAST	Breast Cancer	PIK3CA	COSMIC	Moderate EA	-0.832289
KYSE410_OESOPHAGUS	Esophageal Cancer	ABL1	COSMIC	Moderate EA	-0.19644
KYSE410_OESOPHAGUS	Esophageal Cancer	FLT3	COSMIC	Moderate EA	-0.195994
KYSE410_OESOPHAGUS	Esophageal Cancer	CHD4	COSMIC	Moderate EA	-0.930917
KYSE410_OESOPHAGUS	Esophageal Cancer	KRAS	COSMIC	Moderate EA	-0.787228
MELJUSO_SKIN	Skin Cancer	GATA2	COSMIC	Moderate EA	0.228492
MELJUSO_SKIN	Skin Cancer	HRAS	COSMIC	Moderate EA	-0.993693
SNU349_KIDNEY	Kidney Cancer	MTOR	COSMIC	Moderate EA	-1.1959
SNU349_KIDNEY	Kidney Cancer	STAT3	COSMIC	Moderate EA	0.293542
SNU349_KIDNEY	Kidney Cancer	TRRAP	COSMIC	Moderate EA	-0.85701
ESS1_ENDOMETRIUM	Endometrial Cancer	CHD4	COSMIC	Moderate EA	-1.00584
ESS1_ENDOMETRIUM	Endometrial Cancer	ACVR1	COSMIC	Moderate EA	0.0626308
ESS1_ENDOMETRIUM	Endometrial Cancer	PIK3CA	COSMIC	Moderate EA	-0.598013
TE4_OESOPHAGUS	Esophageal Cancer	DDR2	COSMIC	Moderate EA	0.109927
HT55_LARGE_INTESTINE	Colon Cancer	BCL6	COSMIC	Moderate EA	-0.0536984
HT55_LARGE_INTESTINE	Colon Cancer	HIF1A	COSMIC	Moderate EA	0.259665
NCIH23_LUNG	Lung NSCLC	FLT3	COSMIC	Moderate EA	-0.347081
NCIH23_LUNG	Lung NSCLC	DDR2	COSMIC	Moderate EA	0.106983
NCIH23_LUNG	Lung NSCLC	KRAS	COSMIC	Moderate EA	-0.58727
IPC298_SKIN	Skin Cancer	FLT3	COSMIC	Moderate EA	-0.108799
TOV21G_OVARY	Ovarian Cancer	CTNNB1	COSMIC	Moderate EA	-0.216427
TOV21G_OVARY	Ovarian Cancer	KRAS	COSMIC	Moderate EA	-0.78163
IGR1_SKIN	Skin Cancer	FLT3	COSMIC	Moderate EA	-0.0313289
IGR1_SKIN	Skin Cancer	BRAF	COSMIC	Moderate EA	-0.723761
IGR1_SKIN	Skin Cancer	RAC1	COSMIC	Moderate EA	-0.820128
NCIH2172_LUNG	Lung NSCLC	FLT3	COSMIC	Moderate EA	-0.136086
NCIH1573_LUNG	Lung NSCLC	ERBB3	COSMIC	Moderate EA	-0.050286
NCIH1573_LUNG	Lung NSCLC	PREX2	COSMIC	Moderate EA	0.457106
NCIH1573_LUNG	Lung NSCLC	KIT	COSMIC	Moderate EA	-0.331164
NCIH1573_LUNG	Lung NSCLC	NRAS	COSMIC	Moderate EA	-0.116498
NCIH1573_LUNG	Lung NSCLC	KRAS	COSMIC	Moderate EA	-0.678116
EFO27_OVARY	Ovarian Cancer	ERBB2	COSMIC	Moderate EA	-0.254918
NCIH2110_LUNG	Lung NSCLC	PREX2	COSMIC	Moderate EA	0.293787
NCIH2110_LUNG	Lung NSCLC	PDGFRA	COSMIC	Moderate EA	-0.319543
NCIH2110_LUNG	Lung NSCLC	COL2A1	COSMIC	Moderate EA	-0.0158281
NCIH2110_LUNG	Lung NSCLC	HIF1A	COSMIC	Moderate EA	0.211662
NCIH2110_LUNG	Lung NSCLC	ERBB2	COSMIC	Moderate EA	-0.253717
SNU1_STOMACH	Gastric Cancer	STAT3	COSMIC	Moderate EA	0.169995
SNU1_STOMACH	Gastric Cancer	IDH2	COSMIC	Moderate EA	-0.0817055
SNU1_STOMACH	Gastric Cancer	KRAS	COSMIC	Moderate EA	-1.36602
OVK18_OVARY	Ovarian Cancer	MTOR	COSMIC	Moderate EA	-1.15725
OVK18_OVARY	Ovarian Cancer	KRAS	COSMIC	Moderate EA	-0.48812
NALM6_HAEMATOPOIETIC_AND_LYMPHOID_TISSUE	Leukemia	BCL6	COSMIC	Moderate EA	0.209459
NALM6_HAEMATOPOIETIC_AND_LYMPHOID_TISSUE	Leukemia	ERBB2	COSMIC	Moderate EA	-0.116929
JHUEM1_ENDOMETRIUM	Endometrial Cancer	CHD4	COSMIC	Moderate EA	-0.5996
JHUEM1_ENDOMETRIUM	Endometrial Cancer	USP8	COSMIC	Moderate EA	-0.588764
JHUEM1_ENDOMETRIUM	Endometrial Cancer	PIK3CA	COSMIC	Moderate EA	-0.29583
COLO792_SKIN	Skin Cancer	MTOR	COSMIC	Moderate EA	-0.978648
COLO792_SKIN	Skin Cancer	CACNA1D	COSMIC	Moderate EA	-0.00878978
COLO792_SKIN	Skin Cancer	MAP2K2	COSMIC	Moderate EA	-0.154081
HEC1B_ENDOMETRIUM	Endometrial Cancer	ERBB3	COSMIC	Moderate EA	-0.40716
HEC1B_ENDOMETRIUM	Endometrial Cancer	FLT3	COSMIC	Moderate EA	-0.115928
HEC1B_ENDOMETRIUM	Endometrial Cancer	XPO1	COSMIC	Moderate EA	-1.19647
HEC1B_ENDOMETRIUM	Endometrial Cancer	BRAF	COSMIC	Moderate EA	-0.0177375
HEC1B_ENDOMETRIUM	Endometrial Cancer	CACNA1D	COSMIC	Moderate EA	0.0225573
HEC1B_ENDOMETRIUM	Endometrial Cancer	PIK3CA	COSMIC	Moderate EA	-0.661728
HEC1B_ENDOMETRIUM	Endometrial Cancer	KRAS	COSMIC	Moderate EA	-0.66577
REH_HAEMATOPOIETIC_AND_LYMPHOID_TISSUE	Leukemia	XPO1	COSMIC	Moderate EA	-1.08625
REH_HAEMATOPOIETIC_AND_LYMPHOID_TISSUE	Leukemia	RAC1	COSMIC	Moderate EA	-0.473803
LS180_LARGE_INTESTINE	Colon Cancer	CTNNB1	COSMIC	Moderate EA	-0.982751
LS180_LARGE_INTESTINE	Colon Cancer	PRKACA	COSMIC	Moderate EA	-0.195951
LS180_LARGE_INTESTINE	Colon Cancer	DDR2	COSMIC	Moderate EA	-0.0455718
LS180_LARGE_INTESTINE	Colon Cancer	PIK3CA	COSMIC	Moderate EA	-0.483883
LS180_LARGE_INTESTINE	Colon Cancer	KRAS	COSMIC	Moderate EA	-0.820424
639V_URINARY_TRACT	Bladder Cancer	ABL1	COSMIC	Moderate EA	-0.000951126
639V_URINARY_TRACT	Bladder Cancer	CTNNB1	COSMIC	Moderate EA	-0.269787
639V_URINARY_TRACT	Bladder Cancer	PIK3CA	COSMIC	Moderate EA	-0.191331
639V_URINARY_TRACT	Bladder Cancer	KRAS	COSMIC	Moderate EA	-0.0274241
LOVO_LARGE_INTESTINE	Colon Cancer	KRAS	COSMIC	Moderate EA	-0.547701
SUPT1_HAEMATOPOIETIC_AND_LYMPHOID_TISSUE	Leukemia/Lymphoma	MAPK1	COSMIC	Moderate EA	0.044235
SUPT1_HAEMATOPOIETIC_AND_LYMPHOID_TISSUE	Leukemia/Lymphoma	MET	COSMIC	Moderate EA	0.232826
SUPT1_HAEMATOPOIETIC_AND_LYMPHOID_TISSUE	Leukemia/Lymphoma	JAK2	COSMIC	Moderate EA	0.287237
SUPT1_HAEMATOPOIETIC_AND_LYMPHOID_TISSUE	Leukemia/Lymphoma	PIK3CA	COSMIC	Moderate EA	-0.973013
SUPT1_HAEMATOPOIETIC_AND_LYMPHOID_TISSUE	Leukemia/Lymphoma	MPL	COSMIC	Moderate EA	-0.0350259
SW48_LARGE_INTESTINE	Colon Cancer	MAP2K1	COSMIC	Moderate EA	0.0329107
SW48_LARGE_INTESTINE	Colon Cancer	BCL6	COSMIC	Moderate EA	0.16419
SW48_LARGE_INTESTINE	Colon Cancer	STAT3	COSMIC	Moderate EA	0.301045
SW48_LARGE_INTESTINE	Colon Cancer	RET	COSMIC	Moderate EA	-0.254351
SW48_LARGE_INTESTINE	Colon Cancer	TRRAP	COSMIC	Moderate EA	-1.15023
SW48_LARGE_INTESTINE	Colon Cancer	CARD11	COSMIC	Moderate EA	-0.301981
CCK81_LARGE_INTESTINE	Colon Cancer	ABL1	COSMIC	Moderate EA	-0.094749
CCK81_LARGE_INTESTINE	Colon Cancer	CHD4	COSMIC	Moderate EA	-0.929009
CCK81_LARGE_INTESTINE	Colon Cancer	CTNNB1	COSMIC	Moderate EA	-1.34904
CCK81_LARGE_INTESTINE	Colon Cancer	PDGFRA	COSMIC	Moderate EA	-0.360849
CCK81_LARGE_INTESTINE	Colon Cancer	PIK3CA	COSMIC	Moderate EA	-0.537525
HEC151_ENDOMETRIUM	Endometrial Cancer	TRRAP	COSMIC	Moderate EA	-1.30925
HEC151_ENDOMETRIUM	Endometrial Cancer	PIK3CA	COSMIC	Moderate EA	-0.307798
HEC151_ENDOMETRIUM	Endometrial Cancer	NRAS	COSMIC	Moderate EA	-0.506403
SNGM_ENDOMETRIUM	Endometrial Cancer	CACNA1D	COSMIC	Moderate EA	0.0486016
SNGM_ENDOMETRIUM	Endometrial Cancer	CARD11	COSMIC	Moderate EA	-0.251655
SNGM_ENDOMETRIUM	Endometrial Cancer	PIK3CA	COSMIC	Moderate EA	-0.257416
RKO_LARGE_INTESTINE	Colon Cancer	ABL1	COSMIC	Moderate EA	0.0849683
RKO_LARGE_INTESTINE	Colon Cancer	BRAF	COSMIC	Moderate EA	-0.696699
RKO_LARGE_INTESTINE	Colon Cancer	TRRAP	COSMIC	Moderate EA	-1.01744
RKO_LARGE_INTESTINE	Colon Cancer	PIK3CA	COSMIC	Moderate EA	-0.615579
KM12_LARGE_INTESTINE	Colon Cancer	CHD4	COSMIC	Moderate EA	-1.14607
KM12_LARGE_INTESTINE	Colon Cancer	CACNA1D	COSMIC	Moderate EA	-0.0057588
KM12_LARGE_INTESTINE	Colon Cancer	TRRAP	COSMIC	Moderate EA	-1.09463
KM12_LARGE_INTESTINE	Colon Cancer	ERBB2	COSMIC	Moderate EA	-0.188955
KM12_LARGE_INTESTINE	Colon Cancer	MPL	COSMIC	Moderate EA	-0.0625681
HEC1A_ENDOMETRIUM	Endometrial Cancer	ERBB3	COSMIC	Moderate EA	-0.403953
HEC1A_ENDOMETRIUM	Endometrial Cancer	BRAF	COSMIC	Moderate EA	-0.139822
HEC1A_ENDOMETRIUM	Endometrial Cancer	CACNA1D	COSMIC	Moderate EA	-0.171985
HEC1A_ENDOMETRIUM	Endometrial Cancer	TRRAP	COSMIC	Moderate EA	-1.00136
HEC1A_ENDOMETRIUM	Endometrial Cancer	PPM1D	COSMIC	Moderate EA	-0.129763
HEC1A_ENDOMETRIUM	Endometrial Cancer	PIK3CA	COSMIC	Moderate EA	-0.769876
HEC1A_ENDOMETRIUM	Endometrial Cancer	KRAS	COSMIC	Moderate EA	-0.824287
PF382_HAEMATOPOIETIC_AND_LYMPHOID_TISSUE	Leukemia	MAP2K1	COSMIC	Moderate EA	-0.0218029
PF382_HAEMATOPOIETIC_AND_LYMPHOID_TISSUE	Leukemia	ERBB3	COSMIC	Moderate EA	-0.060128
PF382_HAEMATOPOIETIC_AND_LYMPHOID_TISSUE	Leukemia	CHD4	COSMIC	Moderate EA	-1.27649
PF382_HAEMATOPOIETIC_AND_LYMPHOID_TISSUE	Leukemia	CTNNB1	COSMIC	Moderate EA	0.208355
PF382_HAEMATOPOIETIC_AND_LYMPHOID_TISSUE	Leukemia	CSF3R	COSMIC	Moderate EA	-0.221617
PF382_HAEMATOPOIETIC_AND_LYMPHOID_TISSUE	Leukemia	NRAS	COSMIC	Moderate EA	-0.76397
HEC6_ENDOMETRIUM	Endometrial Cancer	ABL1	COSMIC	Moderate EA	-0.113392
HEC6_ENDOMETRIUM	Endometrial Cancer	XPO1	COSMIC	Moderate EA	-1.49181
HEC6_ENDOMETRIUM	Endometrial Cancer	RAC1	COSMIC	Moderate EA	-0.663222
HEC6_ENDOMETRIUM	Endometrial Cancer	HIF1A	COSMIC	Moderate EA	0.210381
HEC6_ENDOMETRIUM	Endometrial Cancer	TRRAP	COSMIC	Moderate EA	-1.10934
HEC6_ENDOMETRIUM	Endometrial Cancer	CARD11	COSMIC	Moderate EA	-0.269537
HEC6_ENDOMETRIUM	Endometrial Cancer	MYD88	COSMIC	Moderate EA	-0.0339102
HEC6_ENDOMETRIUM	Endometrial Cancer	KRAS	COSMIC	Moderate EA	-0.267853
MFE319_ENDOMETRIUM	Endometrial Cancer	BRAF	COSMIC	Moderate EA	-0.130156
MFE319_ENDOMETRIUM	Endometrial Cancer	HIF1A	COSMIC	Moderate EA	0.010498
MFE319_ENDOMETRIUM	Endometrial Cancer	MET	COSMIC	Moderate EA	0.0779465
MFE319_ENDOMETRIUM	Endometrial Cancer	PRKACA	COSMIC	Moderate EA	-0.229105
MFE319_ENDOMETRIUM	Endometrial Cancer	CD79B	COSMIC	Moderate EA	-0.065468
HT115_LARGE_INTESTINE	Colon Cancer	IKBKB	COSMIC	Moderate EA	-0.155109
HT115_LARGE_INTESTINE	Colon Cancer	PREX2	COSMIC	Moderate EA	0.215669
HT115_LARGE_INTESTINE	Colon Cancer	USP8	COSMIC	Moderate EA	-1.15645
HT115_LARGE_INTESTINE	Colon Cancer	BCL6	COSMIC	Moderate EA	0.0222601
HT115_LARGE_INTESTINE	Colon Cancer	ALK	COSMIC	Moderate EA	-0.162589
HT115_LARGE_INTESTINE	Colon Cancer	PTPN11	COSMIC	Moderate EA	-0.710801
HT115_LARGE_INTESTINE	Colon Cancer	TRRAP	COSMIC	Moderate EA	-1.29404
HT115_LARGE_INTESTINE	Colon Cancer	MET	COSMIC	Moderate EA	0.190889
HT115_LARGE_INTESTINE	Colon Cancer	JAK2	COSMIC	Moderate EA	0.158652
HT115_LARGE_INTESTINE	Colon Cancer	PIK3CA	COSMIC	Moderate EA	-0.779586
HT115_LARGE_INTESTINE	Colon Cancer	MPL	COSMIC	Moderate EA	-0.0406004
EN_ENDOMETRIUM	Endometrial Cancer	MTOR	COSMIC	Moderate EA	-1.06268
EN_ENDOMETRIUM	Endometrial Cancer	FLT3	COSMIC	Moderate EA	-0.2278
EN_ENDOMETRIUM	Endometrial Cancer	STAT3	COSMIC	Moderate EA	0.189121
EN_ENDOMETRIUM	Endometrial Cancer	HIF1A	COSMIC	Moderate EA	0.0310178
EN_ENDOMETRIUM	Endometrial Cancer	JAK2	COSMIC	Moderate EA	0.207942
EN_ENDOMETRIUM	Endometrial Cancer	PIK3CA	COSMIC	Moderate EA	-0.430895
HEC59_ENDOMETRIUM	Endometrial Cancer	MTOR	COSMIC	Moderate EA	-0.793955
HEC59_ENDOMETRIUM	Endometrial Cancer	CHD4	COSMIC	Moderate EA	-0.886672
HEC59_ENDOMETRIUM	Endometrial Cancer	STAT3	COSMIC	Moderate EA	0.0268093
HEC59_ENDOMETRIUM	Endometrial Cancer	ALK	COSMIC	Moderate EA	-0.405382
HEC59_ENDOMETRIUM	Endometrial Cancer	TRRAP	COSMIC	Moderate EA	-1.30577
HEC59_ENDOMETRIUM	Endometrial Cancer	CARD11	COSMIC	Moderate EA	-0.112383
HEC59_ENDOMETRIUM	Endometrial Cancer	PIK3CA	COSMIC	Moderate EA	-0.11391
HEC59_ENDOMETRIUM	Endometrial Cancer	ERBB2	COSMIC	Moderate EA	-0.180571
HEC251_ENDOMETRIUM	Endometrial Cancer	ERBB3	COSMIC	Moderate EA	-0.25186
HEC251_ENDOMETRIUM	Endometrial Cancer	MTOR	COSMIC	Moderate EA	-0.807876
HEC251_ENDOMETRIUM	Endometrial Cancer	PREX2	COSMIC	Moderate EA	0.341033
HEC251_ENDOMETRIUM	Endometrial Cancer	CHD4	COSMIC	Moderate EA	-1.11768
HEC251_ENDOMETRIUM	Endometrial Cancer	USP8	COSMIC	Moderate EA	-0.764664
HEC251_ENDOMETRIUM	Endometrial Cancer	PDGFRA	COSMIC	Moderate EA	-0.280473
HEC251_ENDOMETRIUM	Endometrial Cancer	STAT3	COSMIC	Moderate EA	0.101034
HEC251_ENDOMETRIUM	Endometrial Cancer	ACVR1	COSMIC	Moderate EA	0.0755716
HEC251_ENDOMETRIUM	Endometrial Cancer	HIF1A	COSMIC	Moderate EA	0.251663
HEC251_ENDOMETRIUM	Endometrial Cancer	ALK	COSMIC	Moderate EA	-0.210272
HEC251_ENDOMETRIUM	Endometrial Cancer	TRRAP	COSMIC	Moderate EA	-1.04628
HEC251_ENDOMETRIUM	Endometrial Cancer	KIT	COSMIC	Moderate EA	-0.0362675
HEC251_ENDOMETRIUM	Endometrial Cancer	CARD11	COSMIC	Moderate EA	0.0438857
HEC251_ENDOMETRIUM	Endometrial Cancer	MYD88	COSMIC	Moderate EA	-0.0240756
HEC251_ENDOMETRIUM	Endometrial Cancer	MET	COSMIC	Moderate EA	-0.0291776
HEC251_ENDOMETRIUM	Endometrial Cancer	PIK3CA	COSMIC	Moderate EA	-0.0314892
HEC251_ENDOMETRIUM	Endometrial Cancer	CD79B	COSMIC	Moderate EA	0.133734
CH157MN_CENTRAL_NERVOUS_SYSTEM	Meningioma	NRAS	CI IND (ALL)	Moderate EA	-1.00496
U178_CENTRAL_NERVOUS_SYSTEM	Brain Cancer	RAC1	CI IND (ALL)	Moderate EA	-0.484709
COV434_OVARY	Ovarian Cancer	NRIP1	CI IND (ALL)	Moderate EA	0.109245
COV434_OVARY	Ovarian Cancer	POLQ	CI IND (ALL)	Moderate EA	-0.505308
SKHEP1_LIVER	Liver Cancer	BRAF	CI IND (ALL)	Moderate EA	-0.459025
PATU8988S_PANCREAS	Pancreatic Cancer	ATM	CI IND (ALL)	Moderate EA	0.128027
IMR32_AUTONOMIC_GANGLIA	Neuroblastoma	ATM	CI IND (ALL)	Moderate EA	0.14972
HT1080_SOFT_TISSUE	Soft Tissue Sarcoma	NRAS	CI IND (ALL)	Moderate EA	-0.97121
SNU840_OVARY	Ovarian Cancer	PIK3CA	CI IND (ALL)	Moderate EA	-0.734335
COGE352_BONE	Ewing\'s Sarcoma	COL8A1	CI IND (ALL)	Moderate EA	-0.100862
PANC0203_PANCREAS	Pancreatic Cancer	KRAS	CI IND (ALL)	Moderate EA	-1.39817
BC3C_URINARY_TRACT	Bladder Cancer	NFE2L2	CI IND (ALL)	Moderate EA	-0.695234
BC3C_URINARY_TRACT	Bladder Cancer	KEAP1	CI IND (ALL)	Moderate EA	0.26343
BC3C_URINARY_TRACT	Bladder Cancer	PIK3CA	CI IND (ALL)	Moderate EA	-1.04158
BC3C_URINARY_TRACT	Bladder Cancer	SF3B1	CI IND (ALL)	Moderate EA	-1.17534
INA6_HAEMATOPOIETIC_AND_LYMPHOID_TISSUE	Multiple Myeloma	NRAS	CI IND (ALL)	Moderate EA	-0.932129
CHP212_AUTONOMIC_GANGLIA	Neuroblastoma/Brain Cancer	NRAS	CI IND (ALL)	Moderate EA	-0.775222
SF767_CENTRAL_NERVOUS_SYSTEM	Brain Cancer	RGL2	CI IND (ALL)	Moderate EA	0.118978
SF767_CENTRAL_NERVOUS_SYSTEM	Brain Cancer	PIK3CA	CI IND (ALL)	Moderate EA	-0.810564
CFPAC1_PANCREAS	Pancreatic Cancer	MEPCE	CI IND (ALL)	Moderate EA	-0.476062
HS683_CENTRAL_NERVOUS_SYSTEM	GBM/Brain Cancer	ZBTB20	CI IND (ALL)	Moderate EA	-0.00241446
HS683_CENTRAL_NERVOUS_SYSTEM	GBM/Brain Cancer	MTOR	CI IND (ALL)	Moderate EA	-1.24713
SNU8_OVARY	Ovarian Cancer	KRAS	CI IND (ALL)	Moderate EA	-1.23912
SLR20_KIDNEY	Kidney Cancer	REV3L	CI IND (ALL)	Moderate EA	-0.557048
SLR20_KIDNEY	Kidney Cancer	ATM	CI IND (ALL)	Moderate EA	-0.12294
JHOM1_OVARY	Ovarian Cancer	INMT	CI IND (ALL)	Moderate EA	-0.10245
PANC1005_PANCREAS	Pancreatic Cancer	KRAS	CI IND (ALL)	Moderate EA	-1.04838
PANC1005_PANCREAS	Pancreatic Cancer	SOS2	CI IND (ALL)	Moderate EA	-0.256602
OAW28_OVARY	Ovarian Cancer	KEAP1	CI IND (ALL)	Moderate EA	-0.159842
COGAR359_SOFT_TISSUE	Rhabdoid	FOXA1	CI IND (ALL)	Moderate EA	-0.0536804
COGAR359_SOFT_TISSUE	Rhabdoid	FBXW7	CI IND (ALL)	Moderate EA	-0.124375
BICR6_UPPER_AERODIGESTIVE_TRACT	Head and Neck Cancer	SPOP	CI IND (ALL)	Moderate EA	0.0595168
BICR6_UPPER_AERODIGESTIVE_TRACT	Head and Neck Cancer	PCGF2	CI IND (ALL)	Moderate EA	-0.48307
SIMA_AUTONOMIC_GANGLIA	Neuroblastoma	DNMT3A	CI IND (ALL)	Moderate EA	0.105953
697_HAEMATOPOIETIC_AND_LYMPHOID_TISSUE	Leukemia	NRAS	CI IND (ALL)	Moderate EA	-0.777333
NCIH747_LARGE_INTESTINE	Colon Cancer	KRAS	CI IND (ALL)	Moderate EA	-1.07398
CCFSTTG1_CENTRAL_NERVOUS_SYSTEM	Brain Cancer	COL19A1	CI IND (ALL)	Moderate EA	0.13126
CCFSTTG1_CENTRAL_NERVOUS_SYSTEM	Brain Cancer	ZNF727	CI IND (ALL)	Moderate EA	0.107622
OV7_OVARY	Ovarian Cancer	FBXW7	CI IND (ALL)	Moderate EA	-0.200986
OV7_OVARY	Ovarian Cancer	KRAS	CI IND (ALL)	Moderate EA	-1.58348
MHHNB11_AUTONOMIC_GANGLIA	Neuroblastoma	NRIP1	CI IND (ALL)	Moderate EA	0.0706131
HLF_LIVER	Liver Cancer	FAM98C	CI IND (ALL)	Moderate EA	0.102276
DKMG_CENTRAL_NERVOUS_SYSTEM	Brain Cancer	PIK3CA	CI IND (ALL)	Moderate EA	-0.56471
LN443_CENTRAL_NERVOUS_SYSTEM	GBM/Brain Cancer	NFE2L2	CI IND (ALL)	Moderate EA	-0.0728492
SLR26_KIDNEY	Kidney Cancer	KIF21A	CI IND (ALL)	Moderate EA	-0.0167392
JR_SOFT_TISSUE	Rhabdomyosarcoma	HRAS	CI IND (ALL)	Moderate EA	-0.537208
JR_SOFT_TISSUE	Rhabdomyosarcoma	DDX50	CI IND (ALL)	Moderate EA	-0.148878
HS729_SOFT_TISSUE	Soft Tissue/Sarcoma	SMTN	CI IND (ALL)	Moderate EA	-0.1516
HS578T_BREAST	Breast Cancer	HRAS	CI IND (ALL)	Moderate EA	-0.559368
RT4_URINARY_TRACT	Bladder Cancer	DNMT3A	CI IND (ALL)	Moderate EA	-0.000710061
KPL1_BREAST	Breast Cancer	PIK3CA	CI IND (ALL)	Moderate EA	-0.546919
KLE_ENDOMETRIUM	Endometrial Cancer	FBXW7	CI IND (ALL)	Moderate EA	-0.400024
T24_URINARY_TRACT	Bladder Cancer	CSMD3	CI IND (ALL)	Moderate EA	0.134775
LNZ308_CENTRAL_NERVOUS_SYSTEM	Brain Cancer	REV3L	CI IND (ALL)	Moderate EA	-0.59628
SKNAS_AUTONOMIC_GANGLIA	Neuroblastoma	NRAS	CI IND (ALL)	Moderate EA	-0.999699
SKNAS_AUTONOMIC_GANGLIA	Neuroblastoma	CIC	CI IND (ALL)	Moderate EA	-0.310924
JIMT1_BREAST	Breast Cancer	PIK3CA	CI IND (ALL)	Moderate EA	-0.586393
D283MED_CENTRAL_NERVOUS_SYSTEM	Medulloblastoma/ Brain Cancer	ZNF814	CI IND (ALL)	Moderate EA	0.111237
BT549_BREAST	Breast Cancer	POLQ	CI IND (ALL)	Moderate EA	-0.212013
CAL29_URINARY_TRACT	Bladder Cancer	PIK3CA	CI IND (ALL)	Moderate EA	-1.09574
COV362_OVARY	Ovarian Cancer	LZTR1	CI IND (ALL)	Moderate EA	-0.0158276
HCC827_LUNG	Lung NSCLC	REV3L	CI IND (ALL)	Moderate EA	-0.519037
HCC827_LUNG	Lung NSCLC	MYB	CI IND (ALL)	Moderate EA	-0.184247
TCCPAN2_PANCREAS	Pancreatic Cancer	COL8A1	CI IND (ALL)	Moderate EA	-0.0336089
TCCPAN2_PANCREAS	Pancreatic Cancer	KRAS	CI IND (ALL)	Moderate EA	-1.05531
OV90_OVARY	Ovarian Cancer	CSMD3	CI IND (ALL)	Moderate EA	0.126214
HS766T_PANCREAS	Pancreatic Cancer	KRAS	CI IND (ALL)	Moderate EA	-0.913304
8MGBA_CENTRAL_NERVOUS_SYSTEM	Brain Cancer	LZTR1	CI IND (ALL)	Moderate EA	-0.0871598
SNU213_PANCREAS	Pancreatic Cancer	NOSTRIN	CI IND (ALL)	Moderate EA	-0.0680021
SNU213_PANCREAS	Pancreatic Cancer	SMAD4	CI IND (ALL)	Moderate EA	-0.00823532
T3M4_PANCREAS	Pancreatic Cancer	KRAS	CI IND (ALL)	Moderate EA	-0.66644
DETROIT562_UPPER_AERODIGESTIVE_TRACT	Head and Neck Cancer	PIK3CA	CI IND (ALL)	Moderate EA	-0.832243
HUPT3_PANCREAS	Pancreatic Cancer	KRAS	CI IND (ALL)	Moderate EA	-0.404737
CAKI2_KIDNEY	Kidney Cancer	KEAP1	CI IND (ALL)	Moderate EA	-0.135994
CJM_SKIN	Skin Cancer	HRAS	CI IND (ALL)	Moderate EA	-0.781283
JHOC5_OVARY	Ovarian Cancer	ARHGAP5	CI IND (ALL)	Moderate EA	-0.164019
PECAPJ41CLONED2_UPPER_AERODIGESTIVE_TRACT	Head and Neck Cancer	CSMD3	CI IND (ALL)	Moderate EA	0.200722
PECAPJ41CLONED2_UPPER_AERODIGESTIVE_TRACT	Head and Neck Cancer	COL19A1	CI IND (ALL)	Moderate EA	-0.0887159
KELLY_AUTONOMIC_GANGLIA	Neuroblastoma	CDK12	CI IND (ALL)	Moderate EA	-0.505371
KELLY_AUTONOMIC_GANGLIA	Neuroblastoma	ZNF862	CI IND (ALL)	Moderate EA	-0.221815
HT1197_URINARY_TRACT	Bladder Cancer	NRAS	CI IND (ALL)	Moderate EA	-0.556798
HT1197_URINARY_TRACT	Bladder Cancer	PIK3CA	CI IND (ALL)	Moderate EA	-0.757394
SNU1105_CENTRAL_NERVOUS_SYSTEM	Brain Cancer	EGFR	CI IND (ALL)	Moderate EA	0.14204
SNU1105_CENTRAL_NERVOUS_SYSTEM	Brain Cancer	SMAD4	CI IND (ALL)	Moderate EA	-0.0715532
PANC0403_PANCREAS	Pancreatic Cancer	KRAS	CI IND (ALL)	Moderate EA	-1.23928
SW837_LARGE_INTESTINE	Colon Cancer	KRAS	CI IND (ALL)	Moderate EA	-1.01075
SW837_LARGE_INTESTINE	Colon Cancer	POLQ	CI IND (ALL)	Moderate EA	-0.278695
ASPC1_PANCREAS	Pancreatic Cancer	KRAS	CI IND (ALL)	Moderate EA	-1.3176
U251MG_CENTRAL_NERVOUS_SYSTEM	Brain Cancer	COL4A4	CI IND (ALL)	Moderate EA	0.0213583
SNU685_ENDOMETRIUM	Endometrial Cancer	COL4A3	CI IND (ALL)	Moderate EA	-0.0667847
MALME3M_SKIN	Skin Cancer	BRAF	CI IND (ALL)	Moderate EA	-1.76428
PSN1_PANCREAS	Pancreatic Cancer	KRAS	CI IND (ALL)	Moderate EA	-1.33148
SR786_HAEMATOPOIETIC_AND_LYMPHOID_TISSUE	Lymphoma	DACH1	CI IND (ALL)	Moderate EA	0.320651
HCC1143_BREAST	Breast Cancer	FGFR2	CI IND (ALL)	Moderate EA	-0.0310392
PK1_PANCREAS	Pancreatic Cancer	KRAS	CI IND (ALL)	Moderate EA	-1.04379
PK1_PANCREAS	Pancreatic Cancer	FBXL17	CI IND (ALL)	Moderate EA	-0.00677087
KMRC20_KIDNEY	Kidney Cancer	MTOR	CI IND (ALL)	Moderate EA	-1.06014
KMRC20_KIDNEY	Kidney Cancer	HS6ST1	CI IND (ALL)	Moderate EA	-0.261178
NOMO1_HAEMATOPOIETIC_AND_LYMPHOID_TISSUE	Leukemia	ZNF862	CI IND (ALL)	Moderate EA	-0.0920105
NOMO1_HAEMATOPOIETIC_AND_LYMPHOID_TISSUE	Leukemia	KRAS	CI IND (ALL)	Moderate EA	-0.947338
NOMO1_HAEMATOPOIETIC_AND_LYMPHOID_TISSUE	Leukemia	POLQ	CI IND (ALL)	Moderate EA	-0.438124
NOMO1_HAEMATOPOIETIC_AND_LYMPHOID_TISSUE	Leukemia	CIC	CI IND (ALL)	Moderate EA	-0.0703982
CALU6_LUNG	Lung NSCLC	GNAS	CI IND (ALL)	Moderate EA	-0.102234
CALU6_LUNG	Lung NSCLC	KRAS	CI IND (ALL)	Moderate EA	-1.36176
EFM19_BREAST	Breast Cancer	CEL	CI IND (ALL)	Moderate EA	-0.0959907
EFM19_BREAST	Breast Cancer	PIK3CA	CI IND (ALL)	Moderate EA	-0.774883
EFM19_BREAST	Breast Cancer	LZTR1	CI IND (ALL)	Moderate EA	-0.262028
RT112_URINARY_TRACT	Bladder Cancer	PIK3CA	CI IND (ALL)	Moderate EA	-0.2726
CORL47_LUNG	Lung SCLC	CSMD3	CI IND (ALL)	Moderate EA	-0.0487694
CORL47_LUNG	Lung SCLC	CIC	CI IND (ALL)	Moderate EA	0.148338
BICR16_UPPER_AERODIGESTIVE_TRACT	Head and Neck Cancer	NFE2L2	CI IND (ALL)	Moderate EA	-0.766753
HEYA8_OVARY	Ovarian Cancer	KRAS	CI IND (ALL)	Moderate EA	-0.888794
MPP89_PLEURA	Mesothelioma/Lung Cancer	UPF2	CI IND (ALL)	Moderate EA	-0.974624
MPP89_PLEURA	Mesothelioma/Lung Cancer	KEAP1	CI IND (ALL)	Moderate EA	-0.0458867
THP1_HAEMATOPOIETIC_AND_LYMPHOID_TISSUE	Leukemia	NRAS	CI IND (ALL)	Moderate EA	-1.25079
HCC95_LUNG	Lung NSCLC	GNAS	CI IND (ALL)	Moderate EA	-0.0629763
HCC95_LUNG	Lung NSCLC	FBXL17	CI IND (ALL)	Moderate EA	0.218989
KPNYN_AUTONOMIC_GANGLIA	Neuroblastoma	GNAS	CI IND (ALL)	Moderate EA	-0.148404
COLO201_LARGE_INTESTINE	Colon Cancer	2018-03-11	CI IND (ALL)	Moderate EA	0.0885612
COLO201_LARGE_INTESTINE	Colon Cancer	POU4F1	CI IND (ALL)	Moderate EA	0.0288939
COLO201_LARGE_INTESTINE	Colon Cancer	BRAF	CI IND (ALL)	Moderate EA	-0.896512
COLO201_LARGE_INTESTINE	Colon Cancer	MTOR	CI IND (ALL)	Moderate EA	-1.06293
RMUGS_OVARY	Ovarian Cancer	PLCL1	CI IND (ALL)	Moderate EA	0.213681
RMUGS_OVARY	Ovarian Cancer	TEP1	CI IND (ALL)	Moderate EA	0.219113
RMUGS_OVARY	Ovarian Cancer	CHD8	CI IND (ALL)	Moderate EA	0.158824
RMUGS_OVARY	Ovarian Cancer	CSMD3	CI IND (ALL)	Moderate EA	0.061157
HT144_SKIN	Skin Cancer	BRAF	CI IND (ALL)	Moderate EA	-1.04855
NCIH2122_LUNG	Lung NSCLC	KRAS	CI IND (ALL)	Moderate EA	-0.807784
NCIH2122_LUNG	Lung NSCLC	KEAP1	CI IND (ALL)	Moderate EA	0.0429214
SNU398_LIVER	Liver Cancer	ZNF862	CI IND (ALL)	Moderate EA	-0.0977613
SNU398_LIVER	Liver Cancer	CTNNB1	CI IND (ALL)	Moderate EA	-1.00635
SNU398_LIVER	Liver Cancer	SLC25A2	CI IND (ALL)	Moderate EA	0.00495306
OSRC2_KIDNEY	Kidney Cancer	REV3L	CI IND (ALL)	Moderate EA	-0.586824
OSRC2_KIDNEY	Kidney Cancer	INMT	CI IND (ALL)	Moderate EA	-0.190713
KP4_PANCREAS	Pancreatic Cancer	KRAS	CI IND (ALL)	Moderate EA	-1.017
KP4_PANCREAS	Pancreatic Cancer	MEPCE	CI IND (ALL)	Moderate EA	-0.730149
RPMI7951_SKIN	Skin Cancer	BRAF	CI IND (ALL)	Moderate EA	-0.432768
CORL279_LUNG	Lung SCLC	NRAS	CI IND (ALL)	Moderate EA	-0.0938183
DU4475_BREAST	Breast Cancer	BRAF	CI IND (ALL)	Moderate EA	-1.27359
CAL78_BONE	Chondrosarcoma/Bone Cancer	COL19A1	CI IND (ALL)	Moderate EA	0.0826712
RD_SOFT_TISSUE	Rhabdomyosarcoma	COL4A4	CI IND (ALL)	Moderate EA	0.137357
RD_SOFT_TISSUE	Rhabdomyosarcoma	NRAS	CI IND (ALL)	Moderate EA	-1.25596
BICR56_UPPER_AERODIGESTIVE_TRACT	Head and Neck Cancer	CSMD3	CI IND (ALL)	Moderate EA	0.159694
SNU410_PANCREAS	Pancreatic Cancer	KLF5	CI IND (ALL)	Moderate EA	-0.0463819
SNU410_PANCREAS	Pancreatic Cancer	KRAS	CI IND (ALL)	Moderate EA	-1.33226
SNU410_PANCREAS	Pancreatic Cancer	MTOR	CI IND (ALL)	Moderate EA	-1.17796
NCIH1792_LUNG	Lung NSCLC	ZBTB20	CI IND (ALL)	Moderate EA	0.113157
NCIH1792_LUNG	Lung NSCLC	KRAS	CI IND (ALL)	Moderate EA	-1.16026
NCIH1792_LUNG	Lung NSCLC	COL19A1	CI IND (ALL)	Moderate EA	-0.061636
NCIH1792_LUNG	Lung NSCLC	SOS2	CI IND (ALL)	Moderate EA	-0.0749638
SF172_CENTRAL_NERVOUS_SYSTEM	Brain Cancer	KIF21A	CI IND (ALL)	Moderate EA	-0.0452902
K029AX_SKIN	Skin Cancer	BRAF	CI IND (ALL)	Moderate EA	-0.664909
CAL33_UPPER_AERODIGESTIVE_TRACT	Head and Neck Cancer	PIK3CA	CI IND (ALL)	Moderate EA	-0.790191
KALS1_CENTRAL_NERVOUS_SYSTEM	Brain Cancer	MTOR	CI IND (ALL)	Moderate EA	-1.0734
KNS60_CENTRAL_NERVOUS_SYSTEM	Brain Cancer	EGFR	CI IND (ALL)	Moderate EA	0.274883
KNS60_CENTRAL_NERVOUS_SYSTEM	Brain Cancer	ACVR1B	CI IND (ALL)	Moderate EA	-0.0575032
U2OS_BONE	Bone Cancer	NRIP1	CI IND (ALL)	Moderate EA	0.175068
253J_URINARY_TRACT	Bladder Cancer	PIK3CA	CI IND (ALL)	Moderate EA	-0.796848
SJSA1_BONE	Bone Cancer	KRAS	CI IND (ALL)	Moderate EA	-0.601138
SJSA1_BONE	Bone Cancer	NRAS	CI IND (ALL)	Moderate EA	-0.127124
TEN_ENDOMETRIUM	Endometrial Cancer	KRAS	CI IND (ALL)	Moderate EA	-0.419567
TEN_ENDOMETRIUM	Endometrial Cancer	MTOR	CI IND (ALL)	Moderate EA	-1.14744
KP2_PANCREAS	Pancreatic Cancer	KRAS	CI IND (ALL)	Moderate EA	-1.01833
LI7_LIVER	Liver Cancer	ATM	CI IND (ALL)	Moderate EA	0.0311386
SKNDZ_AUTONOMIC_GANGLIA	Neuroblastoma	KIF21A	CI IND (ALL)	Moderate EA	-0.0632758
SYO1_SOFT_TISSUE	Soft Tissue Cancer	NRAS	CI IND (ALL)	Moderate EA	-0.0337907
C32_SKIN	Skin Cancer	BRAF	CI IND (ALL)	Moderate EA	-0.818672
C32_SKIN	Skin Cancer	MTOR	CI IND (ALL)	Moderate EA	-0.987547
JJN3_HAEMATOPOIETIC_AND_LYMPHOID_TISSUE	Multiple Myeloma/Leukemia, Plasma Cell	NRAS	CI IND (ALL)	Moderate EA	-0.854013
JJN3_HAEMATOPOIETIC_AND_LYMPHOID_TISSUE	Multiple Myeloma/Leukemia, Plasma Cell	CTNNB1	CI IND (ALL)	Moderate EA	-0.054992
CL40_LARGE_INTESTINE	Colon Cancer	KRAS	CI IND (ALL)	Moderate EA	-1.36425
SNU449_LIVER	Liver Cancer	INMT	CI IND (ALL)	Moderate EA	0.101828
NCIN87_STOMACH	Gastric Cancer	ATF7IP	CI IND (ALL)	Moderate EA	-0.0786182
BFTC909_KIDNEY	Kidney Cancer	TEP1	CI IND (ALL)	Moderate EA	-0.0196302
BFTC909_KIDNEY	Kidney Cancer	PIK3CA	CI IND (ALL)	Moderate EA	-0.617639
C2BBE1_LARGE_INTESTINE	Colon Cancer	SMAD4	CI IND (ALL)	Moderate EA	-0.177608
C2BBE1_LARGE_INTESTINE	Colon Cancer	CTNNB1	CI IND (ALL)	Moderate EA	-0.636163
MIAPACA2_PANCREAS	Pancreatic Cancer	CSMD3	CI IND (ALL)	Moderate EA	0.0884189
MIAPACA2_PANCREAS	Pancreatic Cancer	KRAS	CI IND (ALL)	Moderate EA	-1.2098
EFO21_OVARY	Ovarian Cancer	CEL	CI IND (ALL)	Moderate EA	-0.041034
MKN45_STOMACH	Gastric Cancer	CSMD3	CI IND (ALL)	Moderate EA	0.0152657
GSU_STOMACH	Gastric Cancer	KIF21A	CI IND (ALL)	Moderate EA	-0.0354105
GSU_STOMACH	Gastric Cancer	KRAS	CI IND (ALL)	Moderate EA	-1.00043
GSU_STOMACH	Gastric Cancer	HTR1E	CI IND (ALL)	Moderate EA	0.0917095
SAOS2_BONE	Bone Cancer	NOSTRIN	CI IND (ALL)	Moderate EA	-0.0455003
SAOS2_BONE	Bone Cancer	ZNF211	CI IND (ALL)	Moderate EA	0.00488701
HT1376_URINARY_TRACT	Bladder Cancer	ZNF862	CI IND (ALL)	Moderate EA	0.0107619
HCC1806_BREAST	Breast Cancer	ZNF211	CI IND (ALL)	Moderate EA	0.0349655
UMUC3_URINARY_TRACT	Bladder Cancer	KRAS	CI IND (ALL)	Moderate EA	-1.05302
KURAMOCHI_OVARY	Ovarian Cancer	GNAS	CI IND (ALL)	Moderate EA	-0.040013
OVISE_OVARY	Ovarian Cancer	PIK3CA	CI IND (ALL)	Moderate EA	-0.67899
8305C_THYROID	Thyroid Cancer	BRAF	CI IND (ALL)	Moderate EA	-1.0015
MELHO_SKIN	Skin Cancer	COL4A4	CI IND (ALL)	Moderate EA	-0.00806763
MELHO_SKIN	Skin Cancer	BRAF	CI IND (ALL)	Moderate EA	-1.09994
KU1919_URINARY_TRACT	Bladder Cancer	TSC22D1	CI IND (ALL)	Moderate EA	0.00582333
KU1919_URINARY_TRACT	Bladder Cancer	NRAS	CI IND (ALL)	Moderate EA	-0.872991
HCC1428_BREAST	Breast Cancer	CIC	CI IND (ALL)	Moderate EA	0.0970635
COLO800_SKIN	Skin Cancer	OR51A4	CI IND (ALL)	Moderate EA	0.12128
COLO800_SKIN	Skin Cancer	CSMD3	CI IND (ALL)	Moderate EA	0.0658656
COLO800_SKIN	Skin Cancer	BRAF	CI IND (ALL)	Moderate EA	-0.831934
786O_KIDNEY	Kidney Cancer	ATM	CI IND (ALL)	Moderate EA	-0.0284227
786O_KIDNEY	Kidney Cancer	CIC	CI IND (ALL)	Moderate EA	0.118354
786O_KIDNEY	Kidney Cancer	SMTN	CI IND (ALL)	Moderate EA	-0.202919
OUMS23_LARGE_INTESTINE	Colon Cancer	CSMD3	CI IND (ALL)	Moderate EA	0.0732094
OUMS23_LARGE_INTESTINE	Colon Cancer	CDK12	CI IND (ALL)	Moderate EA	-0.318371
OUMS23_LARGE_INTESTINE	Colon Cancer	BRAF	CI IND (ALL)	Moderate EA	-0.426984
WM983B_SKIN	Skin Cancer	BRAF	CI IND (ALL)	Moderate EA	-1.27924
TCCSUP_URINARY_TRACT	Bladder Cancer	PIK3CA	CI IND (ALL)	Moderate EA	-0.722348
TF1_HAEMATOPOIETIC_AND_LYMPHOID_TISSUE	Leukemia	NRAS	CI IND (ALL)	Moderate EA	-0.395305
NCIH2030_LUNG	Lung NSCLC	KRAS	CI IND (ALL)	Moderate EA	-0.982606
NCIH2030_LUNG	Lung NSCLC	KEAP1	CI IND (ALL)	Moderate EA	-0.0122638
LS1034_LARGE_INTESTINE	Colon Cancer	KRAS	CI IND (ALL)	Moderate EA	-0.806623
LS1034_LARGE_INTESTINE	Colon Cancer	POLQ	CI IND (ALL)	Moderate EA	-0.342957
HS944T_SKIN	Skin Cancer	FBXW7	CI IND (ALL)	Moderate EA	-0.0328019
HS944T_SKIN	Skin Cancer	NRAS	CI IND (ALL)	Moderate EA	-1.1846
MAC2A_HAEMATOPOIETIC_AND_LYMPHOID_TISSUE	Lymphoma	COL4A3	CI IND (ALL)	Moderate EA	-0.0439777
OVTOKO_OVARY	Ovarian Cancer	REV3L	CI IND (ALL)	Moderate EA	-0.395886
OVTOKO_OVARY	Ovarian Cancer	GNAS	CI IND (ALL)	Moderate EA	-0.00686441
OVCAR8_OVARY	Ovarian Cancer	REV3L	CI IND (ALL)	Moderate EA	-0.708159
OVCAR8_OVARY	Ovarian Cancer	ATM	CI IND (ALL)	Moderate EA	-0.121591
OVCAR8_OVARY	Ovarian Cancer	CTNNB1	CI IND (ALL)	Moderate EA	-0.0256412
LU99_LUNG	Lung NSCLC	CHD8	CI IND (ALL)	Moderate EA	0.0737759
LU99_LUNG	Lung NSCLC	KRAS	CI IND (ALL)	Moderate EA	-0.993961
LU99_LUNG	Lung NSCLC	PIK3CA	CI IND (ALL)	Moderate EA	-0.463263
RERFLCAD1_LUNG	Lung NSCLC	CSMD3	CI IND (ALL)	Moderate EA	0.199771
RERFLCAD1_LUNG	Lung NSCLC	ATF7IP	CI IND (ALL)	Moderate EA	-0.029057
RERFLCAD1_LUNG	Lung NSCLC	KRAS	CI IND (ALL)	Moderate EA	-1.12064
RERFLCAD1_LUNG	Lung NSCLC	BRAF	CI IND (ALL)	Moderate EA	-0.074198
RERFLCAD1_LUNG	Lung NSCLC	ZNF727	CI IND (ALL)	Moderate EA	0.148185
UACC62_SKIN	Skin Cancer	BRAF	CI IND (ALL)	Moderate EA	-1.24794
UACC62_SKIN	Skin Cancer	LZTR1	CI IND (ALL)	Moderate EA	-0.170973
KNS42_CENTRAL_NERVOUS_SYSTEM	Brain Cancer	TSC22D1	CI IND (ALL)	Moderate EA	0.0831181
HCC1954_BREAST	Breast Cancer	PIK3CA	CI IND (ALL)	Moderate EA	-0.567164
T84_LARGE_INTESTINE	Colon Cancer	KRAS	CI IND (ALL)	Moderate EA	-0.906031
T84_LARGE_INTESTINE	Colon Cancer	SMAD4	CI IND (ALL)	Moderate EA	-0.400291
T84_LARGE_INTESTINE	Colon Cancer	PIK3CA	CI IND (ALL)	Moderate EA	-0.702315
KMS20_HAEMATOPOIETIC_AND_LYMPHOID_TISSUE	Multiple Myeloma	KRAS	CI IND (ALL)	Moderate EA	-0.928438
WM1799_SKIN	Skin Cancer	GNAS	CI IND (ALL)	Moderate EA	-0.161308
WM1799_SKIN	Skin Cancer	BRAF	CI IND (ALL)	Moderate EA	-0.976231
WM1799_SKIN	Skin Cancer	CTNNB1	CI IND (ALL)	Moderate EA	-0.32802
NCIH1666_LUNG	Lung NSCLC	CSMD3	CI IND (ALL)	Moderate EA	-0.00401153
YKG1_CENTRAL_NERVOUS_SYSTEM	Brain Cancer	PIK3CA	CI IND (ALL)	Moderate EA	-0.233724
SMZ1_HAEMATOPOIETIC_AND_LYMPHOID_TISSUE	Lymphoma	ATF7IP	CI IND (ALL)	Moderate EA	-0.0413967
NCIH460_LUNG	Lung NSCLC	REV3L	CI IND (ALL)	Moderate EA	-0.779823
NCIH460_LUNG	Lung NSCLC	KRAS	CI IND (ALL)	Moderate EA	-0.987446
NCIH460_LUNG	Lung NSCLC	KEAP1	CI IND (ALL)	Moderate EA	-0.128581
NCIH460_LUNG	Lung NSCLC	PIK3CA	CI IND (ALL)	Moderate EA	-0.346741
COLO678_LARGE_INTESTINE	Colon Cancer	KRAS	CI IND (ALL)	Moderate EA	-0.93222
JMSU1_URINARY_TRACT	Bladder Cancer	REV3L	CI IND (ALL)	Moderate EA	-0.409228
RVH421_SKIN	Skin Cancer	BRAF	CI IND (ALL)	Moderate EA	-1.27113
RVH421_SKIN	Skin Cancer	ZNF211	CI IND (ALL)	Moderate EA	0.255114
RVH421_SKIN	Skin Cancer	HTR1E	CI IND (ALL)	Moderate EA	0.217685
NCIH520_LUNG	Lung NSCLC	UPF2	CI IND (ALL)	Moderate EA	-0.600385
NCIH520_LUNG	Lung NSCLC	CSMD3	CI IND (ALL)	Moderate EA	0.157086
NCIH520_LUNG	Lung NSCLC	ACVR1B	CI IND (ALL)	Moderate EA	-0.234846
GSS_STOMACH	Gastric Cancer	FBXW7	CI IND (ALL)	Moderate EA	-0.348127
GSS_STOMACH	Gastric Cancer	CIC	CI IND (ALL)	Moderate EA	0.0893895
SW1463_LARGE_INTESTINE	Colon Cancer	FBXW7	CI IND (ALL)	Moderate EA	-0.0871006
SW1463_LARGE_INTESTINE	Colon Cancer	KRAS	CI IND (ALL)	Moderate EA	-0.952948
SW1463_LARGE_INTESTINE	Colon Cancer	POLQ	CI IND (ALL)	Moderate EA	-0.874515
LS513_LARGE_INTESTINE	Colon Cancer	KRAS	CI IND (ALL)	Moderate EA	-1.11023
LCLC103H_LUNG	Lung NSCLC	CDK12	CI IND (ALL)	Moderate EA	-0.384371
LCLC103H_LUNG	Lung NSCLC	ATF7IP	CI IND (ALL)	Moderate EA	-0.205776
NCIH2170_LUNG	Lung NSCLC	CSMD3	CI IND (ALL)	Moderate EA	0.0737111
KMS34_HAEMATOPOIETIC_AND_LYMPHOID_TISSUE	Multiple Myeloma	PCGF2	CI IND (ALL)	Moderate EA	-0.241955
SUIT2_PANCREAS	Pancreatic Cancer	CSMD3	CI IND (ALL)	Moderate EA	0.0133676
SUIT2_PANCREAS	Pancreatic Cancer	KRAS	CI IND (ALL)	Moderate EA	-1.22384
SUIT2_PANCREAS	Pancreatic Cancer	ZNF471	CI IND (ALL)	Moderate EA	0.309345
PK45H_PANCREAS	Pancreatic Cancer	KRAS	CI IND (ALL)	Moderate EA	-1.43085
PK45H_PANCREAS	Pancreatic Cancer	POLQ	CI IND (ALL)	Moderate EA	-0.154101
NCIH1437_LUNG	Lung NSCLC	LZTR1	CI IND (ALL)	Moderate EA	-0.0121562
HCC56_LARGE_INTESTINE	Colon Cancer	ATM	CI IND (ALL)	Moderate EA	-0.0788502
NCIH716_LARGE_INTESTINE	Colon Cancer	KRAS	CI IND (ALL)	Moderate EA	-0.755951
NCIH716_LARGE_INTESTINE	Colon Cancer	POLQ	CI IND (ALL)	Moderate EA	-0.215078
WM2664_SKIN	Skin Cancer	SMAD4	CI IND (ALL)	Moderate EA	0.0337397
WM2664_SKIN	Skin Cancer	BRAF	CI IND (ALL)	Moderate EA	-1.00817
EPLC272H_LUNG	Lung NSCLC	OR51A4	CI IND (ALL)	Moderate EA	0.0274128
EPLC272H_LUNG	Lung NSCLC	IFFO1	CI IND (ALL)	Moderate EA	-0.0553319
WM115_SKIN	Skin Cancer	CSMD3	CI IND (ALL)	Moderate EA	-0.066015
WM115_SKIN	Skin Cancer	SMAD4	CI IND (ALL)	Moderate EA	-0.0792872
WM115_SKIN	Skin Cancer	BRAF	CI IND (ALL)	Moderate EA	-1.10529
HUH1_LIVER	Liver Cancer	CSMD3	CI IND (ALL)	Moderate EA	0.0435547
HUH1_LIVER	Liver Cancer	ZNF471	CI IND (ALL)	Moderate EA	0.0670883
HUH1_LIVER	Liver Cancer	PPP6C	CI IND (ALL)	Moderate EA	-0.717809
HUH1_LIVER	Liver Cancer	KEAP1	CI IND (ALL)	Moderate EA	-0.0403456
KMS27_HAEMATOPOIETIC_AND_LYMPHOID_TISSUE	Multiple Myeloma	TEP1	CI IND (ALL)	Moderate EA	0.16835
KMS27_HAEMATOPOIETIC_AND_LYMPHOID_TISSUE	Multiple Myeloma	ATM	CI IND (ALL)	Moderate EA	-0.0325388
KMS27_HAEMATOPOIETIC_AND_LYMPHOID_TISSUE	Multiple Myeloma	NRAS	CI IND (ALL)	Moderate EA	-1.08123
HSC2_UPPER_AERODIGESTIVE_TRACT	Head and Neck Cancer	ATM	CI IND (ALL)	Moderate EA	0.0213815
HSC2_UPPER_AERODIGESTIVE_TRACT	Head and Neck Cancer	RAC1	CI IND (ALL)	Moderate EA	-0.367928
HSC2_UPPER_AERODIGESTIVE_TRACT	Head and Neck Cancer	CTNNB1	CI IND (ALL)	Moderate EA	-0.0263994
HSC2_UPPER_AERODIGESTIVE_TRACT	Head and Neck Cancer	PIK3CA	CI IND (ALL)	Moderate EA	-0.907493
HSC2_UPPER_AERODIGESTIVE_TRACT	Head and Neck Cancer	COL4A3	CI IND (ALL)	Moderate EA	-0.0253314
HT29_LARGE_INTESTINE	Colon Cancer	BRAF	CI IND (ALL)	Moderate EA	-0.887585
HT29_LARGE_INTESTINE	Colon Cancer	PIK3CA	CI IND (ALL)	Moderate EA	-0.735684
IGR39_SKIN	Skin Cancer	CSMD3	CI IND (ALL)	Moderate EA	-0.0217564
IGR39_SKIN	Skin Cancer	BRAF	CI IND (ALL)	Moderate EA	-0.784058
SIHA_CERVIX	Cervical Cancer	CSMD3	CI IND (ALL)	Moderate EA	0.107144
SIHA_CERVIX	Cervical Cancer	POLQ	CI IND (ALL)	Moderate EA	-0.17538
MDAMB231_BREAST	Breast Cancer	KRAS	CI IND (ALL)	Moderate EA	-0.996336
L82_HAEMATOPOIETIC_AND_LYMPHOID_TISSUE	Lymphoma	PLCL1	CI IND (ALL)	Moderate EA	0.263403
L82_HAEMATOPOIETIC_AND_LYMPHOID_TISSUE	Lymphoma	CSMD3	CI IND (ALL)	Moderate EA	0.0848495
MM1S_HAEMATOPOIETIC_AND_LYMPHOID_TISSUE	Multiple Myeloma	EGFR	CI IND (ALL)	Moderate EA	0.0749847
MM1S_HAEMATOPOIETIC_AND_LYMPHOID_TISSUE	Multiple Myeloma	KRAS	CI IND (ALL)	Moderate EA	-1.044
MM1S_HAEMATOPOIETIC_AND_LYMPHOID_TISSUE	Multiple Myeloma	CIC	CI IND (ALL)	Moderate EA	0.0291067
MDAMB468_BREAST	Breast Cancer	FAM122A	CI IND (ALL)	Moderate EA	-0.235779
MDAMB468_BREAST	Breast Cancer	COL8A1	CI IND (ALL)	Moderate EA	-0.0833845
MDAMB468_BREAST	Breast Cancer	ZNF471	CI IND (ALL)	Moderate EA	0.128667
MCAS_OVARY	Ovarian Cancer	GNAS	CI IND (ALL)	Moderate EA	-0.0479056
MCAS_OVARY	Ovarian Cancer	KRAS	CI IND (ALL)	Moderate EA	-1.23802
MCAS_OVARY	Ovarian Cancer	PIK3CA	CI IND (ALL)	Moderate EA	-0.854328
KE39_STOMACH	Gastric Cancer	TEP1	CI IND (ALL)	Moderate EA	0.179075
KE39_STOMACH	Gastric Cancer	CTNNB1	CI IND (ALL)	Moderate EA	-0.841396
LK2_LUNG	Lung NSCLC	CSMD3	CI IND (ALL)	Moderate EA	-0.116685
LK2_LUNG	Lung NSCLC	REV3L	CI IND (ALL)	Moderate EA	-0.628881
LK2_LUNG	Lung NSCLC	NFE2L2	CI IND (ALL)	Moderate EA	-0.980101
LK2_LUNG	Lung NSCLC	ZNF727	CI IND (ALL)	Moderate EA	-0.0382576
HMC18_BREAST	Breast Cancer	GNAS	CI IND (ALL)	Moderate EA	-0.091857
HCC1395_BREAST	Breast Cancer	COL19A1	CI IND (ALL)	Moderate EA	0.0415578
SNU503_LARGE_INTESTINE	Colon Cancer	FGFR2	CI IND (ALL)	Moderate EA	0.0666916
SNU503_LARGE_INTESTINE	Colon Cancer	POLQ	CI IND (ALL)	Moderate EA	-0.172354
NCIH1299_LUNG	Lung NSCLC	NRAS	CI IND (ALL)	Moderate EA	-0.729497
UACC257_SKIN	Skin Cancer	BRAF	CI IND (ALL)	Moderate EA	-1.02114
KMS26_HAEMATOPOIETIC_AND_LYMPHOID_TISSUE	Multiple Myeloma	KIF21A	CI IND (ALL)	Moderate EA	-0.0675374
NCIH1944_LUNG	Lung NSCLC	PLCL1	CI IND (ALL)	Moderate EA	0.164806
NCIH1944_LUNG	Lung NSCLC	KRAS	CI IND (ALL)	Moderate EA	-0.710858
HCC1359_LUNG	Lung NSCLC	CSMD3	CI IND (ALL)	Moderate EA	0.138271
HCC1359_LUNG	Lung NSCLC	TSC22D1	CI IND (ALL)	Moderate EA	0.0775052
HCC1359_LUNG	Lung NSCLC	NRIP1	CI IND (ALL)	Moderate EA	0.178192
HCC1359_LUNG	Lung NSCLC	POLQ	CI IND (ALL)	Moderate EA	-0.324753
HCC1359_LUNG	Lung NSCLC	SMTN	CI IND (ALL)	Moderate EA	-0.168968
YD38_UPPER_AERODIGESTIVE_TRACT	Head and Neck Cancer	SMTN	CI IND (ALL)	Moderate EA	-0.335607
MDAMB157_BREAST	Breast Cancer	CSMD3	CI IND (ALL)	Moderate EA	0.0166287
MDAMB157_BREAST	Breast Cancer	ZNF471	CI IND (ALL)	Moderate EA	0.158569
MDAMB157_BREAST	Breast Cancer	RAC1	CI IND (ALL)	Moderate EA	-1.15354
JHH5_LIVER	Liver Cancer	KIAA0907	CI IND (ALL)	Moderate EA	-0.0411762
JHH5_LIVER	Liver Cancer	POLQ	CI IND (ALL)	Moderate EA	-0.167225
JHH5_LIVER	Liver Cancer	ATM	CI IND (ALL)	Moderate EA	-0.168563
JHH5_LIVER	Liver Cancer	KEAP1	CI IND (ALL)	Moderate EA	-0.195852
HCC202_BREAST	Breast Cancer	ZBTB20	CI IND (ALL)	Moderate EA	0.109251
HCC202_BREAST	Breast Cancer	PIK3CA	CI IND (ALL)	Moderate EA	-0.815743
WM793_SKIN	Skin Cancer	EEF1A1	CI IND (ALL)	Moderate EA	-0.848499
WM793_SKIN	Skin Cancer	COL4A4	CI IND (ALL)	Moderate EA	0.14814
WM793_SKIN	Skin Cancer	BRAF	CI IND (ALL)	Moderate EA	-0.981121
TE5_OESOPHAGUS	Esophageal Cancer	PIK3CA	CI IND (ALL)	Moderate EA	-0.294865
5637_URINARY_TRACT	Bladder Cancer	DYRK1A	CI IND (ALL)	Moderate EA	-0.65351
5637_URINARY_TRACT	Bladder Cancer	COL4A3	CI IND (ALL)	Moderate EA	-0.0207074
SKMES1_LUNG	Lung NSCLC	CSMD3	CI IND (ALL)	Moderate EA	0.159859
SKMES1_LUNG	Lung NSCLC	ZBTB20	CI IND (ALL)	Moderate EA	0.0748641
SKMES1_LUNG	Lung NSCLC	SLC25A2	CI IND (ALL)	Moderate EA	-0.106127
SKMES1_LUNG	Lung NSCLC	DDX50	CI IND (ALL)	Moderate EA	-0.103805
GB1_CENTRAL_NERVOUS_SYSTEM	Brain Cancer	ATF7IP	CI IND (ALL)	Moderate EA	-0.201534
NCIH838_LUNG	Lung NSCLC	CSMD3	CI IND (ALL)	Moderate EA	0.112232
LXF289_LUNG	Lung NSCLC	ZNF862	CI IND (ALL)	Moderate EA	0.0432931
LXF289_LUNG	Lung NSCLC	CTNNB1	CI IND (ALL)	Moderate EA	-0.445409
HOP62_LUNG	Lung NSCLC	KRAS	CI IND (ALL)	Moderate EA	-0.918806
HS695T_SKIN	Skin Cancer	OR51A4	CI IND (ALL)	Moderate EA	0.194393
HS695T_SKIN	Skin Cancer	CSMD3	CI IND (ALL)	Moderate EA	0.113366
HS695T_SKIN	Skin Cancer	BRAF	CI IND (ALL)	Moderate EA	-1.05294
RPMI8226_HAEMATOPOIETIC_AND_LYMPHOID_TISSUE	Multiple Myeloma	NOSTRIN	CI IND (ALL)	Moderate EA	0.046251
RPMI8226_HAEMATOPOIETIC_AND_LYMPHOID_TISSUE	Multiple Myeloma	EGFR	CI IND (ALL)	Moderate EA	0.142394
RPMI8226_HAEMATOPOIETIC_AND_LYMPHOID_TISSUE	Multiple Myeloma	KRAS	CI IND (ALL)	Moderate EA	-0.961563
EJM_HAEMATOPOIETIC_AND_LYMPHOID_TISSUE	Multiple Myeloma	RAC1	CI IND (ALL)	Moderate EA	-0.0618752
SKMEL24_SKIN	Skin Cancer	COL19A1	CI IND (ALL)	Moderate EA	-0.0113875
SKMEL24_SKIN	Skin Cancer	OR13D1	CI IND (ALL)	Moderate EA	0.0337825
SKMEL24_SKIN	Skin Cancer	BRAF	CI IND (ALL)	Moderate EA	-0.676921
SKMEL24_SKIN	Skin Cancer	DACH1	CI IND (ALL)	Moderate EA	-0.0246544
VMCUB1_URINARY_TRACT	Bladder Cancer	SPOP	CI IND (ALL)	Moderate EA	0.0298063
VMCUB1_URINARY_TRACT	Bladder Cancer	PIK3CA	CI IND (ALL)	Moderate EA	-0.627376
NCIH441_LUNG	Lung NSCLC	2018-03-11	CI IND (ALL)	Moderate EA	0.268707
A2780_OVARY	Ovarian Cancer	PIK3CA	CI IND (ALL)	Moderate EA	-0.485547
SKMEL30_SKIN	Skin Cancer	CCDC82	CI IND (ALL)	Moderate EA	0.259807
SKMEL30_SKIN	Skin Cancer	NRAS	CI IND (ALL)	Moderate EA	-1.12396
A2058_SKIN	Skin Cancer	BRAF	CI IND (ALL)	Moderate EA	-0.657052
A2058_SKIN	Skin Cancer	SF3B1	CI IND (ALL)	Moderate EA	-1.00031
A549_LUNG	Lung NSCLC	KRAS	CI IND (ALL)	Moderate EA	-0.812905
A549_LUNG	Lung NSCLC	POLQ	CI IND (ALL)	Moderate EA	-0.498034
NCIH1648_LUNG	Lung NSCLC	CSMD3	CI IND (ALL)	Moderate EA	0.133735
NCIH1648_LUNG	Lung NSCLC	CEL	CI IND (ALL)	Moderate EA	0.0542863
NCIH1648_LUNG	Lung NSCLC	SPOP	CI IND (ALL)	Moderate EA	-0.198483
NCIH1648_LUNG	Lung NSCLC	PPP2R2B	CI IND (ALL)	Moderate EA	0.163033
NCIH1648_LUNG	Lung NSCLC	KEAP1	CI IND (ALL)	Moderate EA	-0.0253948
NCIH1648_LUNG	Lung NSCLC	SLC25A2	CI IND (ALL)	Moderate EA	0.113132
HEC50B_ENDOMETRIUM	Endometrial Cancer	KRAS	CI IND (ALL)	Moderate EA	-0.543131
KMBC2_URINARY_TRACT	Bladder Cancer	BRAF	CI IND (ALL)	Moderate EA	-0.201138
KMBC2_URINARY_TRACT	Bladder Cancer	SOS2	CI IND (ALL)	Moderate EA	-0.0243346
NCIH1703_LUNG	Lung NSCLC	OR51A4	CI IND (ALL)	Moderate EA	0.129351
NCIH1703_LUNG	Lung NSCLC	CSMD3	CI IND (ALL)	Moderate EA	0.171218
NCIH1703_LUNG	Lung NSCLC	2018-03-11	CI IND (ALL)	Moderate EA	0.16186
NCIH1703_LUNG	Lung NSCLC	ATM	CI IND (ALL)	Moderate EA	-0.233074
NCIH1703_LUNG	Lung NSCLC	RBP1	CI IND (ALL)	Moderate EA	-0.0801377
NCIH1703_LUNG	Lung NSCLC	ARHGAP5	CI IND (ALL)	Moderate EA	-0.0981713
NCIH1703_LUNG	Lung NSCLC	COL4A3	CI IND (ALL)	Moderate EA	-0.0316373
AU565_BREAST	Breast Cancer	SMAD4	CI IND (ALL)	Moderate EA	0.127389
NCIH2291_LUNG	Lung NSCLC	EGFR	CI IND (ALL)	Moderate EA	-0.01086
KNS62_LUNG	Lung NSCLC	PLCL1	CI IND (ALL)	Moderate EA	0.112187
KNS62_LUNG	Lung NSCLC	CHD8	CI IND (ALL)	Moderate EA	-0.131834
KNS62_LUNG	Lung NSCLC	PPP2R2B	CI IND (ALL)	Moderate EA	0.0111837
KNS62_LUNG	Lung NSCLC	COL8A1	CI IND (ALL)	Moderate EA	-0.263985
KNS62_LUNG	Lung NSCLC	HRAS	CI IND (ALL)	Moderate EA	-0.388581
KYSE70_OESOPHAGUS	Esophageal Cancer	NFE2L2	CI IND (ALL)	Moderate EA	-0.632738
KYSE70_OESOPHAGUS	Esophageal Cancer	RHEB	CI IND (ALL)	Moderate EA	-0.481584
KYSE70_OESOPHAGUS	Esophageal Cancer	COL4A3	CI IND (ALL)	Moderate EA	0.0290295
LN18_CENTRAL_NERVOUS_SYSTEM	Brain Cancer	CCDC82	CI IND (ALL)	Moderate EA	0.188749
SW982_SOFT_TISSUE	Soft Tissue Cancer	CSMD3	CI IND (ALL)	Moderate EA	-0.030377
SW982_SOFT_TISSUE	Soft Tissue Cancer	COL4A4	CI IND (ALL)	Moderate EA	0.100941
SW982_SOFT_TISSUE	Soft Tissue Cancer	BRAF	CI IND (ALL)	Moderate EA	-0.718763
SW982_SOFT_TISSUE	Soft Tissue Cancer	MTOR	CI IND (ALL)	Moderate EA	-1.43332
ONS76_CENTRAL_NERVOUS_SYSTEM	Brain Cancer	NRAS	CI IND (ALL)	Moderate EA	-0.752088
ONS76_CENTRAL_NERVOUS_SYSTEM	Brain Cancer	ACVR1B	CI IND (ALL)	Moderate EA	-0.077232
ES2_OVARY	Ovarian Cancer	PLCL1	CI IND (ALL)	Moderate EA	0.105952
ES2_OVARY	Ovarian Cancer	BRAF	CI IND (ALL)	Moderate EA	-0.760505
ES2_OVARY	Ovarian Cancer	COL4A3	CI IND (ALL)	Moderate EA	-0.0156287
SEM_HAEMATOPOIETIC_AND_LYMPHOID_TISSUE	Leukemia	ZNF471	CI IND (ALL)	Moderate EA	0.187411
SEM_HAEMATOPOIETIC_AND_LYMPHOID_TISSUE	Leukemia	RGL2	CI IND (ALL)	Moderate EA	0.156629
SEM_HAEMATOPOIETIC_AND_LYMPHOID_TISSUE	Leukemia	PIK3CA	CI IND (ALL)	Moderate EA	-0.446837
KIJK_HAEMATOPOIETIC_AND_LYMPHOID_TISSUE	Lymphoma	SOS2	CI IND (ALL)	Moderate EA	-0.114986
KIJK_HAEMATOPOIETIC_AND_LYMPHOID_TISSUE	Lymphoma	ARHGAP5	CI IND (ALL)	Moderate EA	-0.216371
KYSE510_OESOPHAGUS	Esophageal Cancer	PLCL1	CI IND (ALL)	Moderate EA	0.166587
KYSE510_OESOPHAGUS	Esophageal Cancer	MTOR	CI IND (ALL)	Moderate EA	-0.880531
KYSE510_OESOPHAGUS	Esophageal Cancer	PIK3CA	CI IND (ALL)	Moderate EA	-0.879138
KYSE510_OESOPHAGUS	Esophageal Cancer	CIC	CI IND (ALL)	Moderate EA	-0.225414
MDAMB435S_SKIN	Skin Cancer	BRAF	CI IND (ALL)	Moderate EA	-0.862427
NCIH2023_LUNG	Lung NSCLC	SOS2	CI IND (ALL)	Moderate EA	-0.032246
A3KAW_HAEMATOPOIETIC_AND_LYMPHOID_TISSUE	Lymphoma	CDK12	CI IND (ALL)	Moderate EA	-0.430707
A3KAW_HAEMATOPOIETIC_AND_LYMPHOID_TISSUE	Lymphoma	NRIP1	CI IND (ALL)	Moderate EA	0.196794
KYSE180_OESOPHAGUS	Esophageal Cancer	TSC22D1	CI IND (ALL)	Moderate EA	0.138864
NCIH2087_LUNG	Lung NSCLC	CSMD3	CI IND (ALL)	Moderate EA	0.227761
NCIH2087_LUNG	Lung NSCLC	ATM	CI IND (ALL)	Moderate EA	-0.0909355
NCIH2087_LUNG	Lung NSCLC	NRAS	CI IND (ALL)	Moderate EA	-0.869749
COLO679_SKIN	Skin Cancer	CSMD3	CI IND (ALL)	Moderate EA	0.0766195
COLO679_SKIN	Skin Cancer	FGFR2	CI IND (ALL)	Moderate EA	-0.0947617
COLO679_SKIN	Skin Cancer	ATM	CI IND (ALL)	Moderate EA	0.274799
COLO679_SKIN	Skin Cancer	BRAF	CI IND (ALL)	Moderate EA	-0.883168
COLO679_SKIN	Skin Cancer	COL4A3	CI IND (ALL)	Moderate EA	0.0412935
SKOV3_OVARY	Ovarian Cancer	CSMD3	CI IND (ALL)	Moderate EA	-0.0674355
SKOV3_OVARY	Ovarian Cancer	PIK3CA	CI IND (ALL)	Moderate EA	-0.764254
CHAGOK1_LUNG	Lung NSCLC	NRIP1	CI IND (ALL)	Moderate EA	0.191361
HGC27_STOMACH	Gastric Cancer	PIK3CA	CI IND (ALL)	Moderate EA	-0.971187
MORCPR_LUNG	Lung NSCLC	TEP1	CI IND (ALL)	Moderate EA	0.107439
MORCPR_LUNG	Lung NSCLC	KRAS	CI IND (ALL)	Moderate EA	-1.2617
P31FUJ_HAEMATOPOIETIC_AND_LYMPHOID_TISSUE	Leukemia	ATF7IP	CI IND (ALL)	Moderate EA	-0.400633
P31FUJ_HAEMATOPOIETIC_AND_LYMPHOID_TISSUE	Leukemia	HTR1E	CI IND (ALL)	Moderate EA	0.160124
P31FUJ_HAEMATOPOIETIC_AND_LYMPHOID_TISSUE	Leukemia	COL4A3	CI IND (ALL)	Moderate EA	0.0637628
P31FUJ_HAEMATOPOIETIC_AND_LYMPHOID_TISSUE	Leukemia	HS6ST1	CI IND (ALL)	Moderate EA	-0.234765
KYSE450_OESOPHAGUS	Esophageal Cancer	COL19A1	CI IND (ALL)	Moderate EA	0.0802846
KYSE450_OESOPHAGUS	Esophageal Cancer	SMAD4	CI IND (ALL)	Moderate EA	-0.0894701
KYSE450_OESOPHAGUS	Esophageal Cancer	CIC	CI IND (ALL)	Moderate EA	-0.0124776
NCIH2126_LUNG	Lung NSCLC	OR51A4	CI IND (ALL)	Moderate EA	0.0988655
NCIH2126_LUNG	Lung NSCLC	KIF21A	CI IND (ALL)	Moderate EA	-0.157286
NCIH2126_LUNG	Lung NSCLC	GNAS	CI IND (ALL)	Moderate EA	0.176353
NCIH2126_LUNG	Lung NSCLC	SMTN	CI IND (ALL)	Moderate EA	0.0721155
NB1_AUTONOMIC_GANGLIA	Neuroblastoma	TSC22D1	CI IND (ALL)	Moderate EA	-0.241474
MDAMB415_BREAST	Breast Cancer	UPF2	CI IND (ALL)	Moderate EA	-0.73244
MDAMB415_BREAST	Breast Cancer	REV3L	CI IND (ALL)	Moderate EA	-0.590414
MDAMB415_BREAST	Breast Cancer	BRAF	CI IND (ALL)	Moderate EA	-0.126866
GCT_SOFT_TISSUE	Soft Tissue/Bone Cancer	COL19A1	CI IND (ALL)	Moderate EA	0.155135
GCT_SOFT_TISSUE	Soft Tissue/Bone Cancer	BRAF	CI IND (ALL)	Moderate EA	-0.790424
GCT_SOFT_TISSUE	Soft Tissue/Bone Cancer	COL4A3	CI IND (ALL)	Moderate EA	-0.0737582
AGS_STOMACH	Gastric Cancer	STAU2	CI IND (ALL)	Moderate EA	0.11044
AGS_STOMACH	Gastric Cancer	COL4A4	CI IND (ALL)	Moderate EA	0.0472966
AGS_STOMACH	Gastric Cancer	GNAS	CI IND (ALL)	Moderate EA	-0.262202
AGS_STOMACH	Gastric Cancer	KRAS	CI IND (ALL)	Moderate EA	-0.834556
AGS_STOMACH	Gastric Cancer	PIK3CA	CI IND (ALL)	Moderate EA	-0.932994
NCIH1568_LUNG	Lung NSCLC	CHD8	CI IND (ALL)	Moderate EA	-0.252929
NCIH1568_LUNG	Lung NSCLC	ATM	CI IND (ALL)	Moderate EA	-0.0384375
NCIH1568_LUNG	Lung NSCLC	RGL2	CI IND (ALL)	Moderate EA	0.0466918
NCIH1568_LUNG	Lung NSCLC	ZNF727	CI IND (ALL)	Moderate EA	0.105585
NCIH1568_LUNG	Lung NSCLC	MTOR	CI IND (ALL)	Moderate EA	-1.26785
KYSE270_OESOPHAGUS	Esophageal Cancer	TEP1	CI IND (ALL)	Moderate EA	0.284073
KYSE270_OESOPHAGUS	Esophageal Cancer	DNMT3A	CI IND (ALL)	Moderate EA	-0.0883203
KYSE270_OESOPHAGUS	Esophageal Cancer	COL4A3	CI IND (ALL)	Moderate EA	0.177787
KYSE30_OESOPHAGUS	Esophageal Cancer	POU4F1	CI IND (ALL)	Moderate EA	-0.0146642
KYSE30_OESOPHAGUS	Esophageal Cancer	HRAS	CI IND (ALL)	Moderate EA	-0.763052
HCC15_LUNG	Lung NSCLC	PLCL1	CI IND (ALL)	Moderate EA	0.205978
HCC15_LUNG	Lung NSCLC	ZNF862	CI IND (ALL)	Moderate EA	-0.600546
HCC15_LUNG	Lung NSCLC	NRAS	CI IND (ALL)	Moderate EA	-0.764675
HCC15_LUNG	Lung NSCLC	CTNNB1	CI IND (ALL)	Moderate EA	-0.101528
HCC15_LUNG	Lung NSCLC	KEAP1	CI IND (ALL)	Moderate EA	-0.181612
HCC15_LUNG	Lung NSCLC	SLC25A2	CI IND (ALL)	Moderate EA	-0.196873
MDST8_LARGE_INTESTINE	Colon Cancer	BRAF	CI IND (ALL)	Moderate EA	-0.782687
CAL51_BREAST	Breast Cancer	RAC1	CI IND (ALL)	Moderate EA	-0.787136
CAL51_BREAST	Breast Cancer	PIK3CA	CI IND (ALL)	Moderate EA	-0.853994
HARA_LUNG	Lung NSCLC	COL8A1	CI IND (ALL)	Moderate EA	0.10517
HARA_LUNG	Lung NSCLC	COL19A1	CI IND (ALL)	Moderate EA	0.078242
MDAMB453_BREAST	Breast Cancer	CHD8	CI IND (ALL)	Moderate EA	0.0557394
MDAMB453_BREAST	Breast Cancer	PIK3CA	CI IND (ALL)	Moderate EA	-0.832289
MDAMB453_BREAST	Breast Cancer	HS6ST1	CI IND (ALL)	Moderate EA	-0.485893
KYSE410_OESOPHAGUS	Esophageal Cancer	GNAS	CI IND (ALL)	Moderate EA	0.0581036
KYSE410_OESOPHAGUS	Esophageal Cancer	KLF5	CI IND (ALL)	Moderate EA	-0.650229
KYSE410_OESOPHAGUS	Esophageal Cancer	KRAS	CI IND (ALL)	Moderate EA	-0.787228
KYSE410_OESOPHAGUS	Esophageal Cancer	ATM	CI IND (ALL)	Moderate EA	-0.079952
MELJUSO_SKIN	Skin Cancer	CHD8	CI IND (ALL)	Moderate EA	0.00104272
MELJUSO_SKIN	Skin Cancer	HRAS	CI IND (ALL)	Moderate EA	-0.993693
MELJUSO_SKIN	Skin Cancer	SOS2	CI IND (ALL)	Moderate EA	-0.0593794
SNU349_KIDNEY	Kidney Cancer	ZBTB20	CI IND (ALL)	Moderate EA	0.0482474
SNU349_KIDNEY	Kidney Cancer	POLQ	CI IND (ALL)	Moderate EA	-0.395091
SNU349_KIDNEY	Kidney Cancer	ATM	CI IND (ALL)	Moderate EA	0.160961
SNU349_KIDNEY	Kidney Cancer	ZNF211	CI IND (ALL)	Moderate EA	0.326219
SNU349_KIDNEY	Kidney Cancer	MTOR	CI IND (ALL)	Moderate EA	-1.1959
ESS1_ENDOMETRIUM	Endometrial Cancer	OR51A4	CI IND (ALL)	Moderate EA	0.121529
ESS1_ENDOMETRIUM	Endometrial Cancer	REV3L	CI IND (ALL)	Moderate EA	-0.685404
ESS1_ENDOMETRIUM	Endometrial Cancer	POLQ	CI IND (ALL)	Moderate EA	-0.407427
ESS1_ENDOMETRIUM	Endometrial Cancer	ATM	CI IND (ALL)	Moderate EA	-0.0115072
ESS1_ENDOMETRIUM	Endometrial Cancer	PIK3CA	CI IND (ALL)	Moderate EA	-0.598013
ESS1_ENDOMETRIUM	Endometrial Cancer	COL4A3	CI IND (ALL)	Moderate EA	-0.032166
ESS1_ENDOMETRIUM	Endometrial Cancer	SF3B1	CI IND (ALL)	Moderate EA	-1.32203
TE4_OESOPHAGUS	Esophageal Cancer	DDX50	CI IND (ALL)	Moderate EA	0.0555775
HT55_LARGE_INTESTINE	Colon Cancer	COL4A4	CI IND (ALL)	Moderate EA	-0.0491549
HT55_LARGE_INTESTINE	Colon Cancer	NRIP1	CI IND (ALL)	Moderate EA	0.0509635
HT55_LARGE_INTESTINE	Colon Cancer	OR13D1	CI IND (ALL)	Moderate EA	0.124143
HT55_LARGE_INTESTINE	Colon Cancer	HS6ST1	CI IND (ALL)	Moderate EA	-0.379808
NCIH23_LUNG	Lung NSCLC	EEF1A1	CI IND (ALL)	Moderate EA	-1.10182
NCIH23_LUNG	Lung NSCLC	ATF7IP	CI IND (ALL)	Moderate EA	-0.0547006
NCIH23_LUNG	Lung NSCLC	KRAS	CI IND (ALL)	Moderate EA	-0.58727
NCIH23_LUNG	Lung NSCLC	COL19A1	CI IND (ALL)	Moderate EA	-0.0921102
NCIH23_LUNG	Lung NSCLC	LZTR1	CI IND (ALL)	Moderate EA	-0.153218
IPC298_SKIN	Skin Cancer	CSMD3	CI IND (ALL)	Moderate EA	0.0672708
IPC298_SKIN	Skin Cancer	TSC22D1	CI IND (ALL)	Moderate EA	0.105323
TOV21G_OVARY	Ovarian Cancer	STAU2	CI IND (ALL)	Moderate EA	0.0440898
TOV21G_OVARY	Ovarian Cancer	KRAS	CI IND (ALL)	Moderate EA	-0.78163
TOV21G_OVARY	Ovarian Cancer	DYRK1A	CI IND (ALL)	Moderate EA	-0.451948
TOV21G_OVARY	Ovarian Cancer	SOX17	CI IND (ALL)	Moderate EA	0.0960026
TOV21G_OVARY	Ovarian Cancer	CTNNB1	CI IND (ALL)	Moderate EA	-0.216427
IGR1_SKIN	Skin Cancer	PPP2R2B	CI IND (ALL)	Moderate EA	0.00120265
IGR1_SKIN	Skin Cancer	ZNF471	CI IND (ALL)	Moderate EA	0.277498
IGR1_SKIN	Skin Cancer	RAC1	CI IND (ALL)	Moderate EA	-0.820128
IGR1_SKIN	Skin Cancer	OR13D1	CI IND (ALL)	Moderate EA	0.17277
IGR1_SKIN	Skin Cancer	BRAF	CI IND (ALL)	Moderate EA	-0.723761
NUGC3_STOMACH	Gastric Cancer	POLQ	CI IND (ALL)	Moderate EA	-0.448632
NCIH2172_LUNG	Lung NSCLC	GNAS	CI IND (ALL)	Moderate EA	-0.0803787
NCIH2172_LUNG	Lung NSCLC	ATM	CI IND (ALL)	Moderate EA	-0.058652
NCIH2172_LUNG	Lung NSCLC	FBXL17	CI IND (ALL)	Moderate EA	0.0366613
NCIH2172_LUNG	Lung NSCLC	MEPCE	CI IND (ALL)	Moderate EA	-0.5965
NCIH1573_LUNG	Lung NSCLC	TEP1	CI IND (ALL)	Moderate EA	0.232851
NCIH1573_LUNG	Lung NSCLC	FBXW7	CI IND (ALL)	Moderate EA	-0.115378
NCIH1573_LUNG	Lung NSCLC	ATF7IP	CI IND (ALL)	Moderate EA	0.139077
NCIH1573_LUNG	Lung NSCLC	GNAS	CI IND (ALL)	Moderate EA	0.0457981
NCIH1573_LUNG	Lung NSCLC	KRAS	CI IND (ALL)	Moderate EA	-0.678116
NCIH1573_LUNG	Lung NSCLC	COL19A1	CI IND (ALL)	Moderate EA	0.166205
NCIH1573_LUNG	Lung NSCLC	NRAS	CI IND (ALL)	Moderate EA	-0.116498
NCIH1573_LUNG	Lung NSCLC	OR13D1	CI IND (ALL)	Moderate EA	0.185267
NCIH1573_LUNG	Lung NSCLC	KEAP1	CI IND (ALL)	Moderate EA	-0.361866
EFO27_OVARY	Ovarian Cancer	TEP1	CI IND (ALL)	Moderate EA	0.158533
NCIH2110_LUNG	Lung NSCLC	PLCL1	CI IND (ALL)	Moderate EA	0.263147
NCIH2110_LUNG	Lung NSCLC	FBXW7	CI IND (ALL)	Moderate EA	0.101798
NCIH2110_LUNG	Lung NSCLC	TSC22D1	CI IND (ALL)	Moderate EA	0.170412
NCIH2110_LUNG	Lung NSCLC	ATM	CI IND (ALL)	Moderate EA	-0.118091
SNU1_STOMACH	Gastric Cancer	MYB	CI IND (ALL)	Moderate EA	-0.163463
SNU1_STOMACH	Gastric Cancer	IDH2	CI IND (ALL)	Moderate EA	-0.0817055
SNU1_STOMACH	Gastric Cancer	KRAS	CI IND (ALL)	Moderate EA	-1.36602
SNU1_STOMACH	Gastric Cancer	SMAD4	CI IND (ALL)	Moderate EA	0.219691
SNU1_STOMACH	Gastric Cancer	ZNF211	CI IND (ALL)	Moderate EA	0.16655
OVK18_OVARY	Ovarian Cancer	NOSTRIN	CI IND (ALL)	Moderate EA	0.057795
OVK18_OVARY	Ovarian Cancer	REV3L	CI IND (ALL)	Moderate EA	-0.89568
OVK18_OVARY	Ovarian Cancer	ZBTB20	CI IND (ALL)	Moderate EA	-0.0105086
OVK18_OVARY	Ovarian Cancer	KRAS	CI IND (ALL)	Moderate EA	-0.48812
OVK18_OVARY	Ovarian Cancer	POU4F1	CI IND (ALL)	Moderate EA	0.100285
OVK18_OVARY	Ovarian Cancer	RGL2	CI IND (ALL)	Moderate EA	0.0668838
OVK18_OVARY	Ovarian Cancer	MTOR	CI IND (ALL)	Moderate EA	-1.15725
OVK18_OVARY	Ovarian Cancer	DDX50	CI IND (ALL)	Moderate EA	-0.044753
NALM6_HAEMATOPOIETIC_AND_LYMPHOID_TISSUE	Leukemia	CEL	CI IND (ALL)	Moderate EA	0.0453924
NALM6_HAEMATOPOIETIC_AND_LYMPHOID_TISSUE	Leukemia	TSC22D1	CI IND (ALL)	Moderate EA	0.237126
NALM6_HAEMATOPOIETIC_AND_LYMPHOID_TISSUE	Leukemia	ZBTB20	CI IND (ALL)	Moderate EA	-0.00397133
NALM6_HAEMATOPOIETIC_AND_LYMPHOID_TISSUE	Leukemia	KEAP1	CI IND (ALL)	Moderate EA	-0.285646
JHUEM1_ENDOMETRIUM	Endometrial Cancer	CHD8	CI IND (ALL)	Moderate EA	0.0320741
JHUEM1_ENDOMETRIUM	Endometrial Cancer	CEL	CI IND (ALL)	Moderate EA	-0.250421
JHUEM1_ENDOMETRIUM	Endometrial Cancer	GNAS	CI IND (ALL)	Moderate EA	-0.295412
JHUEM1_ENDOMETRIUM	Endometrial Cancer	PPP2R2B	CI IND (ALL)	Moderate EA	0.0618201
JHUEM1_ENDOMETRIUM	Endometrial Cancer	PURG	CI IND (ALL)	Moderate EA	-0.0482199
JHUEM1_ENDOMETRIUM	Endometrial Cancer	PIK3CA	CI IND (ALL)	Moderate EA	-0.29583
COLO792_SKIN	Skin Cancer	TEP1	CI IND (ALL)	Moderate EA	0.0565387
COLO792_SKIN	Skin Cancer	COL4A4	CI IND (ALL)	Moderate EA	0.0964856
COLO792_SKIN	Skin Cancer	REV3L	CI IND (ALL)	Moderate EA	-0.762223
COLO792_SKIN	Skin Cancer	TSC22D1	CI IND (ALL)	Moderate EA	0.0972516
COLO792_SKIN	Skin Cancer	DNMT3A	CI IND (ALL)	Moderate EA	0.0171034
COLO792_SKIN	Skin Cancer	ARHGAP5	CI IND (ALL)	Moderate EA	-0.212708
COLO792_SKIN	Skin Cancer	MTOR	CI IND (ALL)	Moderate EA	-0.978648
COLO792_SKIN	Skin Cancer	ZNF814	CI IND (ALL)	Moderate EA	0.0353172
HEC1B_ENDOMETRIUM	Endometrial Cancer	PLCL1	CI IND (ALL)	Moderate EA	0.102761
HEC1B_ENDOMETRIUM	Endometrial Cancer	CHD8	CI IND (ALL)	Moderate EA	-0.0528901
HEC1B_ENDOMETRIUM	Endometrial Cancer	ZBTB20	CI IND (ALL)	Moderate EA	-0.0207845
HEC1B_ENDOMETRIUM	Endometrial Cancer	KRAS	CI IND (ALL)	Moderate EA	-0.66577
HEC1B_ENDOMETRIUM	Endometrial Cancer	POLQ	CI IND (ALL)	Moderate EA	-0.368019
HEC1B_ENDOMETRIUM	Endometrial Cancer	BRAF	CI IND (ALL)	Moderate EA	-0.0177375
HEC1B_ENDOMETRIUM	Endometrial Cancer	PIK3CA	CI IND (ALL)	Moderate EA	-0.661728
HEC1B_ENDOMETRIUM	Endometrial Cancer	CIC	CI IND (ALL)	Moderate EA	-0.301622
REH_HAEMATOPOIETIC_AND_LYMPHOID_TISSUE	Leukemia	PLCL1	CI IND (ALL)	Moderate EA	-0.0490348
REH_HAEMATOPOIETIC_AND_LYMPHOID_TISSUE	Leukemia	COL4A4	CI IND (ALL)	Moderate EA	0.0532372
REH_HAEMATOPOIETIC_AND_LYMPHOID_TISSUE	Leukemia	RAC1	CI IND (ALL)	Moderate EA	-0.473803
LS180_LARGE_INTESTINE	Colon Cancer	CBFB	CI IND (ALL)	Moderate EA	0.0755388
LS180_LARGE_INTESTINE	Colon Cancer	KRAS	CI IND (ALL)	Moderate EA	-0.820424
LS180_LARGE_INTESTINE	Colon Cancer	DYRK1A	CI IND (ALL)	Moderate EA	-0.30336
LS180_LARGE_INTESTINE	Colon Cancer	CTNNB1	CI IND (ALL)	Moderate EA	-0.982751
LS180_LARGE_INTESTINE	Colon Cancer	PIK3CA	CI IND (ALL)	Moderate EA	-0.483883
LS180_LARGE_INTESTINE	Colon Cancer	CIC	CI IND (ALL)	Moderate EA	0.28063
639V_URINARY_TRACT	Bladder Cancer	COL4A4	CI IND (ALL)	Moderate EA	0.0288099
639V_URINARY_TRACT	Bladder Cancer	ATF7IP	CI IND (ALL)	Moderate EA	-0.0488017
639V_URINARY_TRACT	Bladder Cancer	GNAS	CI IND (ALL)	Moderate EA	-0.150246
639V_URINARY_TRACT	Bladder Cancer	KRAS	CI IND (ALL)	Moderate EA	-0.0274241
639V_URINARY_TRACT	Bladder Cancer	ATM	CI IND (ALL)	Moderate EA	-0.159192
639V_URINARY_TRACT	Bladder Cancer	SMAD4	CI IND (ALL)	Moderate EA	0.0703928
639V_URINARY_TRACT	Bladder Cancer	ZNF211	CI IND (ALL)	Moderate EA	0.0406062
639V_URINARY_TRACT	Bladder Cancer	CTNNB1	CI IND (ALL)	Moderate EA	-0.269787
639V_URINARY_TRACT	Bladder Cancer	PIK3CA	CI IND (ALL)	Moderate EA	-0.191331
LOVO_LARGE_INTESTINE	Colon Cancer	ATF7IP	CI IND (ALL)	Moderate EA	-0.352196
LOVO_LARGE_INTESTINE	Colon Cancer	KRAS	CI IND (ALL)	Moderate EA	-0.547701
SUPT1_HAEMATOPOIETIC_AND_LYMPHOID_TISSUE	Leukemia/Lymphoma	TEP1	CI IND (ALL)	Moderate EA	-0.0405047
SUPT1_HAEMATOPOIETIC_AND_LYMPHOID_TISSUE	Leukemia/Lymphoma	UPF2	CI IND (ALL)	Moderate EA	-0.933915
SUPT1_HAEMATOPOIETIC_AND_LYMPHOID_TISSUE	Leukemia/Lymphoma	ATF7IP	CI IND (ALL)	Moderate EA	-0.308184
SUPT1_HAEMATOPOIETIC_AND_LYMPHOID_TISSUE	Leukemia/Lymphoma	KLF5	CI IND (ALL)	Moderate EA	0.0107606
SUPT1_HAEMATOPOIETIC_AND_LYMPHOID_TISSUE	Leukemia/Lymphoma	MAPK1	CI IND (ALL)	Moderate EA	0.044235
SUPT1_HAEMATOPOIETIC_AND_LYMPHOID_TISSUE	Leukemia/Lymphoma	HTR1E	CI IND (ALL)	Moderate EA	0.090856
SUPT1_HAEMATOPOIETIC_AND_LYMPHOID_TISSUE	Leukemia/Lymphoma	PIK3CA	CI IND (ALL)	Moderate EA	-0.973013
SUPT1_HAEMATOPOIETIC_AND_LYMPHOID_TISSUE	Leukemia/Lymphoma	LZTR1	CI IND (ALL)	Moderate EA	-0.0197731
SUPT1_HAEMATOPOIETIC_AND_LYMPHOID_TISSUE	Leukemia/Lymphoma	ZNF814	CI IND (ALL)	Moderate EA	0.0808415
S117_SOFT_TISSUE	Soft Tissue/ Thyroid Cancer	ZBTB20	CI IND (ALL)	Moderate EA	-0.0322869
SW48_LARGE_INTESTINE	Colon Cancer	GNAS	CI IND (ALL)	Moderate EA	-0.244808
CCK81_LARGE_INTESTINE	Colon Cancer	CEL	CI IND (ALL)	Moderate EA	-0.0769673
CCK81_LARGE_INTESTINE	Colon Cancer	EGFR	CI IND (ALL)	Moderate EA	-0.152701
CCK81_LARGE_INTESTINE	Colon Cancer	CTNNB1	CI IND (ALL)	Moderate EA	-1.34904
CCK81_LARGE_INTESTINE	Colon Cancer	PIK3CA	CI IND (ALL)	Moderate EA	-0.537525
CCK81_LARGE_INTESTINE	Colon Cancer	CIC	CI IND (ALL)	Moderate EA	0.0118346
HEC151_ENDOMETRIUM	Endometrial Cancer	ZNF180	CI IND (ALL)	Moderate EA	-0.0176859
HEC151_ENDOMETRIUM	Endometrial Cancer	COL8A1	CI IND (ALL)	Moderate EA	-0.31435
HEC151_ENDOMETRIUM	Endometrial Cancer	FGFR2	CI IND (ALL)	Moderate EA	0.287306
HEC151_ENDOMETRIUM	Endometrial Cancer	IFFO1	CI IND (ALL)	Moderate EA	-0.42949
HEC151_ENDOMETRIUM	Endometrial Cancer	NRAS	CI IND (ALL)	Moderate EA	-0.506403
HEC151_ENDOMETRIUM	Endometrial Cancer	ARHGAP5	CI IND (ALL)	Moderate EA	-0.496792
HEC151_ENDOMETRIUM	Endometrial Cancer	MEPCE	CI IND (ALL)	Moderate EA	-0.879346
HEC151_ENDOMETRIUM	Endometrial Cancer	PIK3CA	CI IND (ALL)	Moderate EA	-0.307798
HEC151_ENDOMETRIUM	Endometrial Cancer	CIC	CI IND (ALL)	Moderate EA	-0.424725
SNGM_ENDOMETRIUM	Endometrial Cancer	TEP1	CI IND (ALL)	Moderate EA	0.144884
SNGM_ENDOMETRIUM	Endometrial Cancer	CSMD3	CI IND (ALL)	Moderate EA	0.206088
SNGM_ENDOMETRIUM	Endometrial Cancer	CDK12	CI IND (ALL)	Moderate EA	-0.350208
SNGM_ENDOMETRIUM	Endometrial Cancer	CCDC82	CI IND (ALL)	Moderate EA	0.233436
SNGM_ENDOMETRIUM	Endometrial Cancer	PIK3CA	CI IND (ALL)	Moderate EA	-0.257416
SNGM_ENDOMETRIUM	Endometrial Cancer	CIC	CI IND (ALL)	Moderate EA	-0.0986924
RKO_LARGE_INTESTINE	Colon Cancer	EEF1A1	CI IND (ALL)	Moderate EA	-0.859989
RKO_LARGE_INTESTINE	Colon Cancer	REV3L	CI IND (ALL)	Moderate EA	-0.509702
RKO_LARGE_INTESTINE	Colon Cancer	GNAS	CI IND (ALL)	Moderate EA	0.0533588
RKO_LARGE_INTESTINE	Colon Cancer	KLF5	CI IND (ALL)	Moderate EA	0.0218643
RKO_LARGE_INTESTINE	Colon Cancer	BRAF	CI IND (ALL)	Moderate EA	-0.696699
RKO_LARGE_INTESTINE	Colon Cancer	DACH1	CI IND (ALL)	Moderate EA	-0.11056
RKO_LARGE_INTESTINE	Colon Cancer	KEAP1	CI IND (ALL)	Moderate EA	-0.586315
RKO_LARGE_INTESTINE	Colon Cancer	PURG	CI IND (ALL)	Moderate EA	0.0602088
RKO_LARGE_INTESTINE	Colon Cancer	PIK3CA	CI IND (ALL)	Moderate EA	-0.615579
KM12_LARGE_INTESTINE	Colon Cancer	FOXA1	CI IND (ALL)	Moderate EA	-0.110907
KM12_LARGE_INTESTINE	Colon Cancer	CSMD3	CI IND (ALL)	Moderate EA	0.0996466
KM12_LARGE_INTESTINE	Colon Cancer	GNAS	CI IND (ALL)	Moderate EA	-0.118554
KM12_LARGE_INTESTINE	Colon Cancer	ZNF862	CI IND (ALL)	Moderate EA	-0.11121
KM12_LARGE_INTESTINE	Colon Cancer	IFFO1	CI IND (ALL)	Moderate EA	0.01422
KM12_LARGE_INTESTINE	Colon Cancer	ATM	CI IND (ALL)	Moderate EA	-0.119008
KM12_LARGE_INTESTINE	Colon Cancer	ACTG1	CI IND (ALL)	Moderate EA	-0.201573
KM12_LARGE_INTESTINE	Colon Cancer	MEPCE	CI IND (ALL)	Moderate EA	-0.822442
KM12_LARGE_INTESTINE	Colon Cancer	SF3B1	CI IND (ALL)	Moderate EA	-0.862921
HEC1A_ENDOMETRIUM	Endometrial Cancer	PLCL1	CI IND (ALL)	Moderate EA	0.461047
HEC1A_ENDOMETRIUM	Endometrial Cancer	CHD8	CI IND (ALL)	Moderate EA	-0.35909
HEC1A_ENDOMETRIUM	Endometrial Cancer	COL4A4	CI IND (ALL)	Moderate EA	0.246193
HEC1A_ENDOMETRIUM	Endometrial Cancer	KRAS	CI IND (ALL)	Moderate EA	-0.824287
HEC1A_ENDOMETRIUM	Endometrial Cancer	2018-03-11	CI IND (ALL)	Moderate EA	-0.0859836
HEC1A_ENDOMETRIUM	Endometrial Cancer	BRAF	CI IND (ALL)	Moderate EA	-0.139822
HEC1A_ENDOMETRIUM	Endometrial Cancer	SOS2	CI IND (ALL)	Moderate EA	0.022426
HEC1A_ENDOMETRIUM	Endometrial Cancer	PIK3CA	CI IND (ALL)	Moderate EA	-0.769876
HEC1A_ENDOMETRIUM	Endometrial Cancer	CIC	CI IND (ALL)	Moderate EA	-0.393624
HEC1A_ENDOMETRIUM	Endometrial Cancer	COL4A3	CI IND (ALL)	Moderate EA	-0.0967681
HEC1A_ENDOMETRIUM	Endometrial Cancer	ZNF814	CI IND (ALL)	Moderate EA	-0.102466
PF382_HAEMATOPOIETIC_AND_LYMPHOID_TISSUE	Leukemia	CHD8	CI IND (ALL)	Moderate EA	-0.361287
PF382_HAEMATOPOIETIC_AND_LYMPHOID_TISSUE	Leukemia	GNAS	CI IND (ALL)	Moderate EA	-0.295932
PF382_HAEMATOPOIETIC_AND_LYMPHOID_TISSUE	Leukemia	ZBTB20	CI IND (ALL)	Moderate EA	-0.0395178
PF382_HAEMATOPOIETIC_AND_LYMPHOID_TISSUE	Leukemia	NRAS	CI IND (ALL)	Moderate EA	-0.76397
PF382_HAEMATOPOIETIC_AND_LYMPHOID_TISSUE	Leukemia	SOX17	CI IND (ALL)	Moderate EA	0.00636068
PF382_HAEMATOPOIETIC_AND_LYMPHOID_TISSUE	Leukemia	CTNNB1	CI IND (ALL)	Moderate EA	0.208355
PF382_HAEMATOPOIETIC_AND_LYMPHOID_TISSUE	Leukemia	COL4A3	CI IND (ALL)	Moderate EA	-0.0113878
HEC6_ENDOMETRIUM	Endometrial Cancer	KIF21A	CI IND (ALL)	Moderate EA	-0.0250003
HEC6_ENDOMETRIUM	Endometrial Cancer	COL8A1	CI IND (ALL)	Moderate EA	-0.163715
HEC6_ENDOMETRIUM	Endometrial Cancer	EGFR	CI IND (ALL)	Moderate EA	0.112458
HEC6_ENDOMETRIUM	Endometrial Cancer	KRAS	CI IND (ALL)	Moderate EA	-0.267853
HEC6_ENDOMETRIUM	Endometrial Cancer	RAC1	CI IND (ALL)	Moderate EA	-0.663222
HEC6_ENDOMETRIUM	Endometrial Cancer	CIC	CI IND (ALL)	Moderate EA	-0.0463729
HEC6_ENDOMETRIUM	Endometrial Cancer	COL4A3	CI IND (ALL)	Moderate EA	-0.0872754
HEC6_ENDOMETRIUM	Endometrial Cancer	SF3B1	CI IND (ALL)	Moderate EA	-1.15531
HEC6_ENDOMETRIUM	Endometrial Cancer	INMT	CI IND (ALL)	Moderate EA	-0.123439
MFE319_ENDOMETRIUM	Endometrial Cancer	EEF1A1	CI IND (ALL)	Moderate EA	-0.794015
MFE319_ENDOMETRIUM	Endometrial Cancer	COL4A4	CI IND (ALL)	Moderate EA	0.159487
MFE319_ENDOMETRIUM	Endometrial Cancer	ATF7IP	CI IND (ALL)	Moderate EA	-0.365668
MFE319_ENDOMETRIUM	Endometrial Cancer	MYB	CI IND (ALL)	Moderate EA	-0.471297
MFE319_ENDOMETRIUM	Endometrial Cancer	ZBTB20	CI IND (ALL)	Moderate EA	-0.0658277
MFE319_ENDOMETRIUM	Endometrial Cancer	NFE2L2	CI IND (ALL)	Moderate EA	-0.370767
MFE319_ENDOMETRIUM	Endometrial Cancer	FGFR2	CI IND (ALL)	Moderate EA	0.112876
MFE319_ENDOMETRIUM	Endometrial Cancer	BRAF	CI IND (ALL)	Moderate EA	-0.130156
HT115_LARGE_INTESTINE	Colon Cancer	CSMD3	CI IND (ALL)	Moderate EA	0.116425
HT115_LARGE_INTESTINE	Colon Cancer	CDK12	CI IND (ALL)	Moderate EA	-0.186202
HT115_LARGE_INTESTINE	Colon Cancer	FOXJ3	CI IND (ALL)	Moderate EA	-0.0708032
HT115_LARGE_INTESTINE	Colon Cancer	REV3L	CI IND (ALL)	Moderate EA	-0.844805
HT115_LARGE_INTESTINE	Colon Cancer	ATF7IP	CI IND (ALL)	Moderate EA	-0.432717
HT115_LARGE_INTESTINE	Colon Cancer	GNAS	CI IND (ALL)	Moderate EA	-0.0192002
HT115_LARGE_INTESTINE	Colon Cancer	PPP2R2B	CI IND (ALL)	Moderate EA	0.120026
HT115_LARGE_INTESTINE	Colon Cancer	KLF5	CI IND (ALL)	Moderate EA	-0.670928
HT115_LARGE_INTESTINE	Colon Cancer	POLQ	CI IND (ALL)	Moderate EA	-0.448061
HT115_LARGE_INTESTINE	Colon Cancer	2018-03-11	CI IND (ALL)	Moderate EA	0.344558
HT115_LARGE_INTESTINE	Colon Cancer	ZNF471	CI IND (ALL)	Moderate EA	0.125412
HT115_LARGE_INTESTINE	Colon Cancer	OR13D1	CI IND (ALL)	Moderate EA	-0.028785
HT115_LARGE_INTESTINE	Colon Cancer	ZNF727	CI IND (ALL)	Moderate EA	0.0106294
HT115_LARGE_INTESTINE	Colon Cancer	ARHGAP5	CI IND (ALL)	Moderate EA	-0.254506
HT115_LARGE_INTESTINE	Colon Cancer	SLC25A2	CI IND (ALL)	Moderate EA	-0.145645
HT115_LARGE_INTESTINE	Colon Cancer	PIK3CA	CI IND (ALL)	Moderate EA	-0.779586
HT115_LARGE_INTESTINE	Colon Cancer	SF3B1	CI IND (ALL)	Moderate EA	-0.89495
HT115_LARGE_INTESTINE	Colon Cancer	INMT	CI IND (ALL)	Moderate EA	-0.0296859
EN_ENDOMETRIUM	Endometrial Cancer	REV3L	CI IND (ALL)	Moderate EA	-0.776537
EN_ENDOMETRIUM	Endometrial Cancer	SPOP	CI IND (ALL)	Moderate EA	-0.22716
EN_ENDOMETRIUM	Endometrial Cancer	FGFR2	CI IND (ALL)	Moderate EA	-0.0990263
EN_ENDOMETRIUM	Endometrial Cancer	2018-03-11	CI IND (ALL)	Moderate EA	0.0880183
EN_ENDOMETRIUM	Endometrial Cancer	ZNF471	CI IND (ALL)	Moderate EA	0.161147
EN_ENDOMETRIUM	Endometrial Cancer	RBP1	CI IND (ALL)	Moderate EA	-0.0639027
EN_ENDOMETRIUM	Endometrial Cancer	MTOR	CI IND (ALL)	Moderate EA	-1.06268
EN_ENDOMETRIUM	Endometrial Cancer	MEPCE	CI IND (ALL)	Moderate EA	-0.577245
EN_ENDOMETRIUM	Endometrial Cancer	PIK3CA	CI IND (ALL)	Moderate EA	-0.430895
EN_ENDOMETRIUM	Endometrial Cancer	SMTN	CI IND (ALL)	Moderate EA	-0.163377
HEC59_ENDOMETRIUM	Endometrial Cancer	PLCL1	CI IND (ALL)	Moderate EA	0.184768
HEC59_ENDOMETRIUM	Endometrial Cancer	TEP1	CI IND (ALL)	Moderate EA	0.111331
HEC59_ENDOMETRIUM	Endometrial Cancer	CHD8	CI IND (ALL)	Moderate EA	-0.0190904
HEC59_ENDOMETRIUM	Endometrial Cancer	CDK12	CI IND (ALL)	Moderate EA	-0.220345
HEC59_ENDOMETRIUM	Endometrial Cancer	COL4A4	CI IND (ALL)	Moderate EA	0.0913695
HEC59_ENDOMETRIUM	Endometrial Cancer	NFE2L2	CI IND (ALL)	Moderate EA	-0.346594
HEC59_ENDOMETRIUM	Endometrial Cancer	FGFR2	CI IND (ALL)	Moderate EA	0.00450129
HEC59_ENDOMETRIUM	Endometrial Cancer	2018-03-11	CI IND (ALL)	Moderate EA	0.0373693
HEC59_ENDOMETRIUM	Endometrial Cancer	ATM	CI IND (ALL)	Moderate EA	-0.152162
HEC59_ENDOMETRIUM	Endometrial Cancer	RGL2	CI IND (ALL)	Moderate EA	-0.0779491
HEC59_ENDOMETRIUM	Endometrial Cancer	ACVR1B	CI IND (ALL)	Moderate EA	0.0108775
HEC59_ENDOMETRIUM	Endometrial Cancer	MTOR	CI IND (ALL)	Moderate EA	-0.793955
HEC59_ENDOMETRIUM	Endometrial Cancer	PIK3CA	CI IND (ALL)	Moderate EA	-0.11391
HEC59_ENDOMETRIUM	Endometrial Cancer	CIC	CI IND (ALL)	Moderate EA	-0.115904
HEC251_ENDOMETRIUM	Endometrial Cancer	PLCL1	CI IND (ALL)	Moderate EA	0.0841329
HEC251_ENDOMETRIUM	Endometrial Cancer	KIF21A	CI IND (ALL)	Moderate EA	-0.064629
HEC251_ENDOMETRIUM	Endometrial Cancer	TEP1	CI IND (ALL)	Moderate EA	-0.0338745
HEC251_ENDOMETRIUM	Endometrial Cancer	LIN7A	CI IND (ALL)	Moderate EA	0.084766
HEC251_ENDOMETRIUM	Endometrial Cancer	REV3L	CI IND (ALL)	Moderate EA	-0.762249
HEC251_ENDOMETRIUM	Endometrial Cancer	FBXW7	CI IND (ALL)	Moderate EA	-0.49899
HEC251_ENDOMETRIUM	Endometrial Cancer	MYB	CI IND (ALL)	Moderate EA	-0.227024
HEC251_ENDOMETRIUM	Endometrial Cancer	ZNF180	CI IND (ALL)	Moderate EA	0.0785755
HEC251_ENDOMETRIUM	Endometrial Cancer	ZNF471	CI IND (ALL)	Moderate EA	0.326724
HEC251_ENDOMETRIUM	Endometrial Cancer	DYRK1A	CI IND (ALL)	Moderate EA	-0.135597
HEC251_ENDOMETRIUM	Endometrial Cancer	RBP1	CI IND (ALL)	Moderate EA	0.0188743
HEC251_ENDOMETRIUM	Endometrial Cancer	ZNF727	CI IND (ALL)	Moderate EA	0.243569
HEC251_ENDOMETRIUM	Endometrial Cancer	SOS2	CI IND (ALL)	Moderate EA	0.0760697
HEC251_ENDOMETRIUM	Endometrial Cancer	ZNF211	CI IND (ALL)	Moderate EA	0.335884
HEC251_ENDOMETRIUM	Endometrial Cancer	PPP6C	CI IND (ALL)	Moderate EA	-0.642658
HEC251_ENDOMETRIUM	Endometrial Cancer	KEAP1	CI IND (ALL)	Moderate EA	-0.500013
HEC251_ENDOMETRIUM	Endometrial Cancer	MTOR	CI IND (ALL)	Moderate EA	-0.807876
HEC251_ENDOMETRIUM	Endometrial Cancer	SLC25A2	CI IND (ALL)	Moderate EA	-0.0967861
HEC251_ENDOMETRIUM	Endometrial Cancer	PIK3CA	CI IND (ALL)	Moderate EA	-0.0314892
HEC251_ENDOMETRIUM	Endometrial Cancer	CIC	CI IND (ALL)	Moderate EA	-0.120736
HEC251_ENDOMETRIUM	Endometrial Cancer	COL4A3	CI IND (ALL)	Moderate EA	-0.108139
HEC251_ENDOMETRIUM	Endometrial Cancer	HS6ST1	CI IND (ALL)	Moderate EA	-0.437176
HEC251_ENDOMETRIUM	Endometrial Cancer	ZNF814	CI IND (ALL)	Moderate EA	0.221822
CH157MN_CENTRAL_NERVOUS_SYSTEM	Meningioma	NRAS	CI PAN	Moderate EA	-1.00496
U178_CENTRAL_NERVOUS_SYSTEM	Brain Cancer	RAC1	CI PAN	Moderate EA	-0.484709
COV434_OVARY	Ovarian Cancer	NRIP1	CI PAN	Moderate EA	0.109245
SKHEP1_LIVER	Liver Cancer	BRAF	CI PAN	Moderate EA	-0.459025
HT1080_SOFT_TISSUE	Soft Tissue Sarcoma	NRAS	CI PAN	Moderate EA	-0.97121
SNU840_OVARY	Ovarian Cancer	PIK3CA	CI PAN	Moderate EA	-0.734335
COGE352_BONE	Ewing\'s Sarcoma	COL8A1	CI PAN	Moderate EA	-0.100862
PANC0203_PANCREAS	Pancreatic Cancer	KRAS	CI PAN	Moderate EA	-1.39817
BC3C_URINARY_TRACT	Bladder Cancer	KEAP1	CI PAN	Moderate EA	0.26343
BC3C_URINARY_TRACT	Bladder Cancer	NFE2L2	CI PAN	Moderate EA	-0.695234
BC3C_URINARY_TRACT	Bladder Cancer	PIK3CA	CI PAN	Moderate EA	-1.04158
INA6_HAEMATOPOIETIC_AND_LYMPHOID_TISSUE	Multiple Myeloma	NRAS	CI PAN	Moderate EA	-0.932129
CHP212_AUTONOMIC_GANGLIA	Neuroblastoma/Brain Cancer	NRAS	CI PAN	Moderate EA	-0.775222
SF767_CENTRAL_NERVOUS_SYSTEM	Brain Cancer	RGL2	CI PAN	Moderate EA	0.118978
SF767_CENTRAL_NERVOUS_SYSTEM	Brain Cancer	PIK3CA	CI PAN	Moderate EA	-0.810564
CFPAC1_PANCREAS	Pancreatic Cancer	MEPCE	CI PAN	Moderate EA	-0.476062
HS683_CENTRAL_NERVOUS_SYSTEM	GBM/Brain Cancer	MTOR	CI PAN	Moderate EA	-1.24713
SNU8_OVARY	Ovarian Cancer	KRAS	CI PAN	Moderate EA	-1.23912
PANC1005_PANCREAS	Pancreatic Cancer	KRAS	CI PAN	Moderate EA	-1.04838
OAW28_OVARY	Ovarian Cancer	KEAP1	CI PAN	Moderate EA	-0.159842
BICR6_UPPER_AERODIGESTIVE_TRACT	Head and Neck Cancer	PCGF2	CI PAN	Moderate EA	-0.48307
BICR6_UPPER_AERODIGESTIVE_TRACT	Head and Neck Cancer	SPOP	CI PAN	Moderate EA	0.0595168
SIMA_AUTONOMIC_GANGLIA	Neuroblastoma	DNMT3A	CI PAN	Moderate EA	0.105953
697_HAEMATOPOIETIC_AND_LYMPHOID_TISSUE	Leukemia	NRAS	CI PAN	Moderate EA	-0.777333
NCIH747_LARGE_INTESTINE	Colon Cancer	KRAS	CI PAN	Moderate EA	-1.07398
OV7_OVARY	Ovarian Cancer	KRAS	CI PAN	Moderate EA	-1.58348
MHHNB11_AUTONOMIC_GANGLIA	Neuroblastoma	NRIP1	CI PAN	Moderate EA	0.0706131
HLF_LIVER	Liver Cancer	FAM98C	CI PAN	Moderate EA	0.102276
DKMG_CENTRAL_NERVOUS_SYSTEM	Brain Cancer	PIK3CA	CI PAN	Moderate EA	-0.56471
LN443_CENTRAL_NERVOUS_SYSTEM	GBM/Brain Cancer	NFE2L2	CI PAN	Moderate EA	-0.0728492
JR_SOFT_TISSUE	Rhabdomyosarcoma	HRAS	CI PAN	Moderate EA	-0.537208
HS729_SOFT_TISSUE	Soft Tissue/Sarcoma	SMTN	CI PAN	Moderate EA	-0.1516
HS578T_BREAST	Breast Cancer	HRAS	CI PAN	Moderate EA	-0.559368
RT4_URINARY_TRACT	Bladder Cancer	DNMT3A	CI PAN	Moderate EA	-0.000710061
KPL1_BREAST	Breast Cancer	PIK3CA	CI PAN	Moderate EA	-0.546919
SKNAS_AUTONOMIC_GANGLIA	Neuroblastoma	NRAS	CI PAN	Moderate EA	-0.999699
JIMT1_BREAST	Breast Cancer	PIK3CA	CI PAN	Moderate EA	-0.586393
D283MED_CENTRAL_NERVOUS_SYSTEM	Medulloblastoma/ Brain Cancer	ZNF814	CI PAN	Moderate EA	0.111237
CAL29_URINARY_TRACT	Bladder Cancer	PIK3CA	CI PAN	Moderate EA	-1.09574
COV362_OVARY	Ovarian Cancer	LZTR1	CI PAN	Moderate EA	-0.0158276
TCCPAN2_PANCREAS	Pancreatic Cancer	COL8A1	CI PAN	Moderate EA	-0.0336089
TCCPAN2_PANCREAS	Pancreatic Cancer	KRAS	CI PAN	Moderate EA	-1.05531
HS766T_PANCREAS	Pancreatic Cancer	KRAS	CI PAN	Moderate EA	-0.913304
8MGBA_CENTRAL_NERVOUS_SYSTEM	Brain Cancer	LZTR1	CI PAN	Moderate EA	-0.0871598
SNU213_PANCREAS	Pancreatic Cancer	NOSTRIN	CI PAN	Moderate EA	-0.0680021
T3M4_PANCREAS	Pancreatic Cancer	KRAS	CI PAN	Moderate EA	-0.66644
DETROIT562_UPPER_AERODIGESTIVE_TRACT	Head and Neck Cancer	PIK3CA	CI PAN	Moderate EA	-0.832243
HUPT3_PANCREAS	Pancreatic Cancer	KRAS	CI PAN	Moderate EA	-0.404737
CAKI2_KIDNEY	Kidney Cancer	KEAP1	CI PAN	Moderate EA	-0.135994
CJM_SKIN	Skin Cancer	HRAS	CI PAN	Moderate EA	-0.781283
HT1197_URINARY_TRACT	Bladder Cancer	PIK3CA	CI PAN	Moderate EA	-0.757394
HT1197_URINARY_TRACT	Bladder Cancer	NRAS	CI PAN	Moderate EA	-0.556798
SNU1105_CENTRAL_NERVOUS_SYSTEM	Brain Cancer	EGFR	CI PAN	Moderate EA	0.14204
PANC0403_PANCREAS	Pancreatic Cancer	KRAS	CI PAN	Moderate EA	-1.23928
SW837_LARGE_INTESTINE	Colon Cancer	KRAS	CI PAN	Moderate EA	-1.01075
ASPC1_PANCREAS	Pancreatic Cancer	KRAS	CI PAN	Moderate EA	-1.3176
U251MG_CENTRAL_NERVOUS_SYSTEM	Brain Cancer	COL4A4	CI PAN	Moderate EA	0.0213583
MALME3M_SKIN	Skin Cancer	BRAF	CI PAN	Moderate EA	-1.76428
PSN1_PANCREAS	Pancreatic Cancer	KRAS	CI PAN	Moderate EA	-1.33148
SR786_HAEMATOPOIETIC_AND_LYMPHOID_TISSUE	Lymphoma	DACH1	CI PAN	Moderate EA	0.320651
PK1_PANCREAS	Pancreatic Cancer	FBXL17	CI PAN	Moderate EA	-0.00677087
PK1_PANCREAS	Pancreatic Cancer	KRAS	CI PAN	Moderate EA	-1.04379
KMRC20_KIDNEY	Kidney Cancer	MTOR	CI PAN	Moderate EA	-1.06014
NOMO1_HAEMATOPOIETIC_AND_LYMPHOID_TISSUE	Leukemia	KRAS	CI PAN	Moderate EA	-0.947338
CALU6_LUNG	Lung NSCLC	GNAS	CI PAN	Moderate EA	-0.102234
CALU6_LUNG	Lung NSCLC	KRAS	CI PAN	Moderate EA	-1.36176
EFM19_BREAST	Breast Cancer	LZTR1	CI PAN	Moderate EA	-0.262028
EFM19_BREAST	Breast Cancer	PIK3CA	CI PAN	Moderate EA	-0.774883
RT112_URINARY_TRACT	Bladder Cancer	PIK3CA	CI PAN	Moderate EA	-0.2726
BICR16_UPPER_AERODIGESTIVE_TRACT	Head and Neck Cancer	NFE2L2	CI PAN	Moderate EA	-0.766753
HEYA8_OVARY	Ovarian Cancer	KRAS	CI PAN	Moderate EA	-0.888794
MPP89_PLEURA	Mesothelioma/Lung Cancer	KEAP1	CI PAN	Moderate EA	-0.0458867
THP1_HAEMATOPOIETIC_AND_LYMPHOID_TISSUE	Leukemia	NRAS	CI PAN	Moderate EA	-1.25079
HCC95_LUNG	Lung NSCLC	FBXL17	CI PAN	Moderate EA	0.218989
HCC95_LUNG	Lung NSCLC	GNAS	CI PAN	Moderate EA	-0.0629763
KPNYN_AUTONOMIC_GANGLIA	Neuroblastoma	GNAS	CI PAN	Moderate EA	-0.148404
COLO201_LARGE_INTESTINE	Colon Cancer	MTOR	CI PAN	Moderate EA	-1.06293
COLO201_LARGE_INTESTINE	Colon Cancer	POU4F1	CI PAN	Moderate EA	0.0288939
COLO201_LARGE_INTESTINE	Colon Cancer	BRAF	CI PAN	Moderate EA	-0.896512
COLO201_LARGE_INTESTINE	Colon Cancer	2018-03-11	CI PAN	Moderate EA	0.0885612
RMUGS_OVARY	Ovarian Cancer	CHD8	CI PAN	Moderate EA	0.158824
HT144_SKIN	Skin Cancer	BRAF	CI PAN	Moderate EA	-1.04855
NCIH2122_LUNG	Lung NSCLC	KEAP1	CI PAN	Moderate EA	0.0429214
NCIH2122_LUNG	Lung NSCLC	KRAS	CI PAN	Moderate EA	-0.807784
SNU398_LIVER	Liver Cancer	CTNNB1	CI PAN	Moderate EA	-1.00635
SNU398_LIVER	Liver Cancer	SLC25A2	CI PAN	Moderate EA	0.00495306
KP4_PANCREAS	Pancreatic Cancer	MEPCE	CI PAN	Moderate EA	-0.730149
KP4_PANCREAS	Pancreatic Cancer	KRAS	CI PAN	Moderate EA	-1.017
RPMI7951_SKIN	Skin Cancer	BRAF	CI PAN	Moderate EA	-0.432768
CORL279_LUNG	Lung SCLC	NRAS	CI PAN	Moderate EA	-0.0938183
DU4475_BREAST	Breast Cancer	BRAF	CI PAN	Moderate EA	-1.27359
RD_SOFT_TISSUE	Rhabdomyosarcoma	COL4A4	CI PAN	Moderate EA	0.137357
RD_SOFT_TISSUE	Rhabdomyosarcoma	NRAS	CI PAN	Moderate EA	-1.25596
SNU410_PANCREAS	Pancreatic Cancer	MTOR	CI PAN	Moderate EA	-1.17796
SNU410_PANCREAS	Pancreatic Cancer	KLF5	CI PAN	Moderate EA	-0.0463819
SNU410_PANCREAS	Pancreatic Cancer	KRAS	CI PAN	Moderate EA	-1.33226
NCIH1792_LUNG	Lung NSCLC	KRAS	CI PAN	Moderate EA	-1.16026
K029AX_SKIN	Skin Cancer	BRAF	CI PAN	Moderate EA	-0.664909
CAL33_UPPER_AERODIGESTIVE_TRACT	Head and Neck Cancer	PIK3CA	CI PAN	Moderate EA	-0.790191
KALS1_CENTRAL_NERVOUS_SYSTEM	Brain Cancer	MTOR	CI PAN	Moderate EA	-1.0734
KNS60_CENTRAL_NERVOUS_SYSTEM	Brain Cancer	EGFR	CI PAN	Moderate EA	0.274883
KNS60_CENTRAL_NERVOUS_SYSTEM	Brain Cancer	ACVR1B	CI PAN	Moderate EA	-0.0575032
U2OS_BONE	Bone Cancer	NRIP1	CI PAN	Moderate EA	0.175068
253J_URINARY_TRACT	Bladder Cancer	PIK3CA	CI PAN	Moderate EA	-0.796848
SJSA1_BONE	Bone Cancer	NRAS	CI PAN	Moderate EA	-0.127124
SJSA1_BONE	Bone Cancer	KRAS	CI PAN	Moderate EA	-0.601138
TEN_ENDOMETRIUM	Endometrial Cancer	MTOR	CI PAN	Moderate EA	-1.14744
TEN_ENDOMETRIUM	Endometrial Cancer	KRAS	CI PAN	Moderate EA	-0.419567
KP2_PANCREAS	Pancreatic Cancer	KRAS	CI PAN	Moderate EA	-1.01833
SYO1_SOFT_TISSUE	Soft Tissue Cancer	NRAS	CI PAN	Moderate EA	-0.0337907
C32_SKIN	Skin Cancer	MTOR	CI PAN	Moderate EA	-0.987547
C32_SKIN	Skin Cancer	BRAF	CI PAN	Moderate EA	-0.818672
JJN3_HAEMATOPOIETIC_AND_LYMPHOID_TISSUE	Multiple Myeloma/Leukemia, Plasma Cell	CTNNB1	CI PAN	Moderate EA	-0.054992
JJN3_HAEMATOPOIETIC_AND_LYMPHOID_TISSUE	Multiple Myeloma/Leukemia, Plasma Cell	NRAS	CI PAN	Moderate EA	-0.854013
CL40_LARGE_INTESTINE	Colon Cancer	KRAS	CI PAN	Moderate EA	-1.36425
NCIN87_STOMACH	Gastric Cancer	ATF7IP	CI PAN	Moderate EA	-0.0786182
BFTC909_KIDNEY	Kidney Cancer	PIK3CA	CI PAN	Moderate EA	-0.617639
C2BBE1_LARGE_INTESTINE	Colon Cancer	CTNNB1	CI PAN	Moderate EA	-0.636163
MIAPACA2_PANCREAS	Pancreatic Cancer	KRAS	CI PAN	Moderate EA	-1.2098
GSU_STOMACH	Gastric Cancer	KRAS	CI PAN	Moderate EA	-1.00043
SAOS2_BONE	Bone Cancer	NOSTRIN	CI PAN	Moderate EA	-0.0455003
SAOS2_BONE	Bone Cancer	ZNF211	CI PAN	Moderate EA	0.00488701
HCC1806_BREAST	Breast Cancer	ZNF211	CI PAN	Moderate EA	0.0349655
UMUC3_URINARY_TRACT	Bladder Cancer	KRAS	CI PAN	Moderate EA	-1.05302
KURAMOCHI_OVARY	Ovarian Cancer	GNAS	CI PAN	Moderate EA	-0.040013
OVISE_OVARY	Ovarian Cancer	PIK3CA	CI PAN	Moderate EA	-0.67899
8305C_THYROID	Thyroid Cancer	BRAF	CI PAN	Moderate EA	-1.0015
MELHO_SKIN	Skin Cancer	BRAF	CI PAN	Moderate EA	-1.09994
MELHO_SKIN	Skin Cancer	COL4A4	CI PAN	Moderate EA	-0.00806763
KU1919_URINARY_TRACT	Bladder Cancer	NRAS	CI PAN	Moderate EA	-0.872991
COLO800_SKIN	Skin Cancer	BRAF	CI PAN	Moderate EA	-0.831934
786O_KIDNEY	Kidney Cancer	SMTN	CI PAN	Moderate EA	-0.202919
OUMS23_LARGE_INTESTINE	Colon Cancer	BRAF	CI PAN	Moderate EA	-0.426984
WM983B_SKIN	Skin Cancer	BRAF	CI PAN	Moderate EA	-1.27924
TCCSUP_URINARY_TRACT	Bladder Cancer	PIK3CA	CI PAN	Moderate EA	-0.722348
TF1_HAEMATOPOIETIC_AND_LYMPHOID_TISSUE	Leukemia	NRAS	CI PAN	Moderate EA	-0.395305
NCIH2030_LUNG	Lung NSCLC	KEAP1	CI PAN	Moderate EA	-0.0122638
NCIH2030_LUNG	Lung NSCLC	KRAS	CI PAN	Moderate EA	-0.982606
LS1034_LARGE_INTESTINE	Colon Cancer	KRAS	CI PAN	Moderate EA	-0.806623
HS944T_SKIN	Skin Cancer	NRAS	CI PAN	Moderate EA	-1.1846
OVTOKO_OVARY	Ovarian Cancer	GNAS	CI PAN	Moderate EA	-0.00686441
OVCAR8_OVARY	Ovarian Cancer	CTNNB1	CI PAN	Moderate EA	-0.0256412
LU99_LUNG	Lung NSCLC	CHD8	CI PAN	Moderate EA	0.0737759
LU99_LUNG	Lung NSCLC	PIK3CA	CI PAN	Moderate EA	-0.463263
LU99_LUNG	Lung NSCLC	KRAS	CI PAN	Moderate EA	-0.993961
RERFLCAD1_LUNG	Lung NSCLC	BRAF	CI PAN	Moderate EA	-0.074198
RERFLCAD1_LUNG	Lung NSCLC	ATF7IP	CI PAN	Moderate EA	-0.029057
RERFLCAD1_LUNG	Lung NSCLC	KRAS	CI PAN	Moderate EA	-1.12064
UACC62_SKIN	Skin Cancer	BRAF	CI PAN	Moderate EA	-1.24794
UACC62_SKIN	Skin Cancer	LZTR1	CI PAN	Moderate EA	-0.170973
HCC1954_BREAST	Breast Cancer	PIK3CA	CI PAN	Moderate EA	-0.567164
T84_LARGE_INTESTINE	Colon Cancer	PIK3CA	CI PAN	Moderate EA	-0.702315
T84_LARGE_INTESTINE	Colon Cancer	KRAS	CI PAN	Moderate EA	-0.906031
KMS20_HAEMATOPOIETIC_AND_LYMPHOID_TISSUE	Multiple Myeloma	KRAS	CI PAN	Moderate EA	-0.928438
WM1799_SKIN	Skin Cancer	BRAF	CI PAN	Moderate EA	-0.976231
WM1799_SKIN	Skin Cancer	CTNNB1	CI PAN	Moderate EA	-0.32802
WM1799_SKIN	Skin Cancer	GNAS	CI PAN	Moderate EA	-0.161308
YKG1_CENTRAL_NERVOUS_SYSTEM	Brain Cancer	PIK3CA	CI PAN	Moderate EA	-0.233724
SMZ1_HAEMATOPOIETIC_AND_LYMPHOID_TISSUE	Lymphoma	ATF7IP	CI PAN	Moderate EA	-0.0413967
NCIH460_LUNG	Lung NSCLC	KEAP1	CI PAN	Moderate EA	-0.128581
NCIH460_LUNG	Lung NSCLC	PIK3CA	CI PAN	Moderate EA	-0.346741
NCIH460_LUNG	Lung NSCLC	KRAS	CI PAN	Moderate EA	-0.987446
COLO678_LARGE_INTESTINE	Colon Cancer	KRAS	CI PAN	Moderate EA	-0.93222
RVH421_SKIN	Skin Cancer	BRAF	CI PAN	Moderate EA	-1.27113
RVH421_SKIN	Skin Cancer	ZNF211	CI PAN	Moderate EA	0.255114
NCIH520_LUNG	Lung NSCLC	ACVR1B	CI PAN	Moderate EA	-0.234846
SW1463_LARGE_INTESTINE	Colon Cancer	KRAS	CI PAN	Moderate EA	-0.952948
LS513_LARGE_INTESTINE	Colon Cancer	KRAS	CI PAN	Moderate EA	-1.11023
LCLC103H_LUNG	Lung NSCLC	ATF7IP	CI PAN	Moderate EA	-0.205776
KMS34_HAEMATOPOIETIC_AND_LYMPHOID_TISSUE	Multiple Myeloma	PCGF2	CI PAN	Moderate EA	-0.241955
SUIT2_PANCREAS	Pancreatic Cancer	KRAS	CI PAN	Moderate EA	-1.22384
PK45H_PANCREAS	Pancreatic Cancer	KRAS	CI PAN	Moderate EA	-1.43085
NCIH1437_LUNG	Lung NSCLC	LZTR1	CI PAN	Moderate EA	-0.0121562
NCIH716_LARGE_INTESTINE	Colon Cancer	KRAS	CI PAN	Moderate EA	-0.755951
WM2664_SKIN	Skin Cancer	BRAF	CI PAN	Moderate EA	-1.00817
WM115_SKIN	Skin Cancer	BRAF	CI PAN	Moderate EA	-1.10529
HUH1_LIVER	Liver Cancer	KEAP1	CI PAN	Moderate EA	-0.0403456
HUH1_LIVER	Liver Cancer	PPP6C	CI PAN	Moderate EA	-0.717809
KMS27_HAEMATOPOIETIC_AND_LYMPHOID_TISSUE	Multiple Myeloma	NRAS	CI PAN	Moderate EA	-1.08123
HSC2_UPPER_AERODIGESTIVE_TRACT	Head and Neck Cancer	RAC1	CI PAN	Moderate EA	-0.367928
HSC2_UPPER_AERODIGESTIVE_TRACT	Head and Neck Cancer	CTNNB1	CI PAN	Moderate EA	-0.0263994
HSC2_UPPER_AERODIGESTIVE_TRACT	Head and Neck Cancer	PIK3CA	CI PAN	Moderate EA	-0.907493
HT29_LARGE_INTESTINE	Colon Cancer	BRAF	CI PAN	Moderate EA	-0.887585
HT29_LARGE_INTESTINE	Colon Cancer	PIK3CA	CI PAN	Moderate EA	-0.735684
IGR39_SKIN	Skin Cancer	BRAF	CI PAN	Moderate EA	-0.784058
MDAMB231_BREAST	Breast Cancer	KRAS	CI PAN	Moderate EA	-0.996336
MM1S_HAEMATOPOIETIC_AND_LYMPHOID_TISSUE	Multiple Myeloma	EGFR	CI PAN	Moderate EA	0.0749847
MM1S_HAEMATOPOIETIC_AND_LYMPHOID_TISSUE	Multiple Myeloma	KRAS	CI PAN	Moderate EA	-1.044
MDAMB468_BREAST	Breast Cancer	COL8A1	CI PAN	Moderate EA	-0.0833845
MCAS_OVARY	Ovarian Cancer	PIK3CA	CI PAN	Moderate EA	-0.854328
MCAS_OVARY	Ovarian Cancer	GNAS	CI PAN	Moderate EA	-0.0479056
MCAS_OVARY	Ovarian Cancer	KRAS	CI PAN	Moderate EA	-1.23802
KE39_STOMACH	Gastric Cancer	CTNNB1	CI PAN	Moderate EA	-0.841396
LK2_LUNG	Lung NSCLC	NFE2L2	CI PAN	Moderate EA	-0.980101
HMC18_BREAST	Breast Cancer	GNAS	CI PAN	Moderate EA	-0.091857
NCIH1299_LUNG	Lung NSCLC	NRAS	CI PAN	Moderate EA	-0.729497
UACC257_SKIN	Skin Cancer	BRAF	CI PAN	Moderate EA	-1.02114
NCIH1944_LUNG	Lung NSCLC	KRAS	CI PAN	Moderate EA	-0.710858
HCC1359_LUNG	Lung NSCLC	SMTN	CI PAN	Moderate EA	-0.168968
HCC1359_LUNG	Lung NSCLC	NRIP1	CI PAN	Moderate EA	0.178192
YD38_UPPER_AERODIGESTIVE_TRACT	Head and Neck Cancer	SMTN	CI PAN	Moderate EA	-0.335607
MDAMB157_BREAST	Breast Cancer	RAC1	CI PAN	Moderate EA	-1.15354
JHH5_LIVER	Liver Cancer	KIAA0907	CI PAN	Moderate EA	-0.0411762
JHH5_LIVER	Liver Cancer	KEAP1	CI PAN	Moderate EA	-0.195852
HCC202_BREAST	Breast Cancer	PIK3CA	CI PAN	Moderate EA	-0.815743
WM793_SKIN	Skin Cancer	BRAF	CI PAN	Moderate EA	-0.981121
WM793_SKIN	Skin Cancer	EEF1A1	CI PAN	Moderate EA	-0.848499
WM793_SKIN	Skin Cancer	COL4A4	CI PAN	Moderate EA	0.14814
TE5_OESOPHAGUS	Esophageal Cancer	PIK3CA	CI PAN	Moderate EA	-0.294865
SKMES1_LUNG	Lung NSCLC	SLC25A2	CI PAN	Moderate EA	-0.106127
GB1_CENTRAL_NERVOUS_SYSTEM	Brain Cancer	ATF7IP	CI PAN	Moderate EA	-0.201534
LXF289_LUNG	Lung NSCLC	CTNNB1	CI PAN	Moderate EA	-0.445409
HOP62_LUNG	Lung NSCLC	KRAS	CI PAN	Moderate EA	-0.918806
HS695T_SKIN	Skin Cancer	BRAF	CI PAN	Moderate EA	-1.05294
RPMI8226_HAEMATOPOIETIC_AND_LYMPHOID_TISSUE	Multiple Myeloma	NOSTRIN	CI PAN	Moderate EA	0.046251
RPMI8226_HAEMATOPOIETIC_AND_LYMPHOID_TISSUE	Multiple Myeloma	EGFR	CI PAN	Moderate EA	0.142394
RPMI8226_HAEMATOPOIETIC_AND_LYMPHOID_TISSUE	Multiple Myeloma	KRAS	CI PAN	Moderate EA	-0.961563
EJM_HAEMATOPOIETIC_AND_LYMPHOID_TISSUE	Multiple Myeloma	RAC1	CI PAN	Moderate EA	-0.0618752
SKMEL24_SKIN	Skin Cancer	BRAF	CI PAN	Moderate EA	-0.676921
SKMEL24_SKIN	Skin Cancer	OR13D1	CI PAN	Moderate EA	0.0337825
SKMEL24_SKIN	Skin Cancer	DACH1	CI PAN	Moderate EA	-0.0246544
VMCUB1_URINARY_TRACT	Bladder Cancer	SPOP	CI PAN	Moderate EA	0.0298063
VMCUB1_URINARY_TRACT	Bladder Cancer	PIK3CA	CI PAN	Moderate EA	-0.627376
NCIH441_LUNG	Lung NSCLC	2018-03-11	CI PAN	Moderate EA	0.268707
A2780_OVARY	Ovarian Cancer	PIK3CA	CI PAN	Moderate EA	-0.485547
SKMEL30_SKIN	Skin Cancer	CCDC82	CI PAN	Moderate EA	0.259807
SKMEL30_SKIN	Skin Cancer	NRAS	CI PAN	Moderate EA	-1.12396
A2058_SKIN	Skin Cancer	BRAF	CI PAN	Moderate EA	-0.657052
A549_LUNG	Lung NSCLC	KRAS	CI PAN	Moderate EA	-0.812905
NCIH1648_LUNG	Lung NSCLC	KEAP1	CI PAN	Moderate EA	-0.0253948
NCIH1648_LUNG	Lung NSCLC	SPOP	CI PAN	Moderate EA	-0.198483
NCIH1648_LUNG	Lung NSCLC	SLC25A2	CI PAN	Moderate EA	0.113132
NCIH1648_LUNG	Lung NSCLC	PPP2R2B	CI PAN	Moderate EA	0.163033
HEC50B_ENDOMETRIUM	Endometrial Cancer	KRAS	CI PAN	Moderate EA	-0.543131
KMBC2_URINARY_TRACT	Bladder Cancer	BRAF	CI PAN	Moderate EA	-0.201138
NCIH1703_LUNG	Lung NSCLC	2018-03-11	CI PAN	Moderate EA	0.16186
NCIH1703_LUNG	Lung NSCLC	RBP1	CI PAN	Moderate EA	-0.0801377
NCIH2291_LUNG	Lung NSCLC	EGFR	CI PAN	Moderate EA	-0.01086
KNS62_LUNG	Lung NSCLC	CHD8	CI PAN	Moderate EA	-0.131834
KNS62_LUNG	Lung NSCLC	HRAS	CI PAN	Moderate EA	-0.388581
KNS62_LUNG	Lung NSCLC	PPP2R2B	CI PAN	Moderate EA	0.0111837
KNS62_LUNG	Lung NSCLC	COL8A1	CI PAN	Moderate EA	-0.263985
KYSE70_OESOPHAGUS	Esophageal Cancer	NFE2L2	CI PAN	Moderate EA	-0.632738
KYSE70_OESOPHAGUS	Esophageal Cancer	RHEB	CI PAN	Moderate EA	-0.481584
LN18_CENTRAL_NERVOUS_SYSTEM	Brain Cancer	CCDC82	CI PAN	Moderate EA	0.188749
SW982_SOFT_TISSUE	Soft Tissue Cancer	MTOR	CI PAN	Moderate EA	-1.43332
SW982_SOFT_TISSUE	Soft Tissue Cancer	BRAF	CI PAN	Moderate EA	-0.718763
SW982_SOFT_TISSUE	Soft Tissue Cancer	COL4A4	CI PAN	Moderate EA	0.100941
ONS76_CENTRAL_NERVOUS_SYSTEM	Brain Cancer	ACVR1B	CI PAN	Moderate EA	-0.077232
ONS76_CENTRAL_NERVOUS_SYSTEM	Brain Cancer	NRAS	CI PAN	Moderate EA	-0.752088
ES2_OVARY	Ovarian Cancer	BRAF	CI PAN	Moderate EA	-0.760505
SEM_HAEMATOPOIETIC_AND_LYMPHOID_TISSUE	Leukemia	RGL2	CI PAN	Moderate EA	0.156629
SEM_HAEMATOPOIETIC_AND_LYMPHOID_TISSUE	Leukemia	PIK3CA	CI PAN	Moderate EA	-0.446837
KYSE510_OESOPHAGUS	Esophageal Cancer	MTOR	CI PAN	Moderate EA	-0.880531
KYSE510_OESOPHAGUS	Esophageal Cancer	PIK3CA	CI PAN	Moderate EA	-0.879138
MDAMB435S_SKIN	Skin Cancer	BRAF	CI PAN	Moderate EA	-0.862427
A3KAW_HAEMATOPOIETIC_AND_LYMPHOID_TISSUE	Lymphoma	NRIP1	CI PAN	Moderate EA	0.196794
NCIH2087_LUNG	Lung NSCLC	NRAS	CI PAN	Moderate EA	-0.869749
COLO679_SKIN	Skin Cancer	BRAF	CI PAN	Moderate EA	-0.883168
SKOV3_OVARY	Ovarian Cancer	PIK3CA	CI PAN	Moderate EA	-0.764254
CHAGOK1_LUNG	Lung NSCLC	NRIP1	CI PAN	Moderate EA	0.191361
HGC27_STOMACH	Gastric Cancer	PIK3CA	CI PAN	Moderate EA	-0.971187
MORCPR_LUNG	Lung NSCLC	KRAS	CI PAN	Moderate EA	-1.2617
P31FUJ_HAEMATOPOIETIC_AND_LYMPHOID_TISSUE	Leukemia	ATF7IP	CI PAN	Moderate EA	-0.400633
NCIH2126_LUNG	Lung NSCLC	SMTN	CI PAN	Moderate EA	0.0721155
NCIH2126_LUNG	Lung NSCLC	GNAS	CI PAN	Moderate EA	0.176353
MDAMB415_BREAST	Breast Cancer	BRAF	CI PAN	Moderate EA	-0.126866
GCT_SOFT_TISSUE	Soft Tissue/Bone Cancer	BRAF	CI PAN	Moderate EA	-0.790424
AGS_STOMACH	Gastric Cancer	COL4A4	CI PAN	Moderate EA	0.0472966
AGS_STOMACH	Gastric Cancer	PIK3CA	CI PAN	Moderate EA	-0.932994
AGS_STOMACH	Gastric Cancer	GNAS	CI PAN	Moderate EA	-0.262202
AGS_STOMACH	Gastric Cancer	KRAS	CI PAN	Moderate EA	-0.834556
AGS_STOMACH	Gastric Cancer	STAU2	CI PAN	Moderate EA	0.11044
NCIH1568_LUNG	Lung NSCLC	MTOR	CI PAN	Moderate EA	-1.26785
NCIH1568_LUNG	Lung NSCLC	CHD8	CI PAN	Moderate EA	-0.252929
NCIH1568_LUNG	Lung NSCLC	RGL2	CI PAN	Moderate EA	0.0466918
KYSE270_OESOPHAGUS	Esophageal Cancer	DNMT3A	CI PAN	Moderate EA	-0.0883203
KYSE30_OESOPHAGUS	Esophageal Cancer	POU4F1	CI PAN	Moderate EA	-0.0146642
KYSE30_OESOPHAGUS	Esophageal Cancer	HRAS	CI PAN	Moderate EA	-0.763052
HCC15_LUNG	Lung NSCLC	KEAP1	CI PAN	Moderate EA	-0.181612
HCC15_LUNG	Lung NSCLC	CTNNB1	CI PAN	Moderate EA	-0.101528
HCC15_LUNG	Lung NSCLC	SLC25A2	CI PAN	Moderate EA	-0.196873
HCC15_LUNG	Lung NSCLC	NRAS	CI PAN	Moderate EA	-0.764675
MDST8_LARGE_INTESTINE	Colon Cancer	BRAF	CI PAN	Moderate EA	-0.782687
CAL51_BREAST	Breast Cancer	RAC1	CI PAN	Moderate EA	-0.787136
CAL51_BREAST	Breast Cancer	PIK3CA	CI PAN	Moderate EA	-0.853994
HARA_LUNG	Lung NSCLC	COL8A1	CI PAN	Moderate EA	0.10517
MDAMB453_BREAST	Breast Cancer	CHD8	CI PAN	Moderate EA	0.0557394
MDAMB453_BREAST	Breast Cancer	PIK3CA	CI PAN	Moderate EA	-0.832289
KYSE410_OESOPHAGUS	Esophageal Cancer	KLF5	CI PAN	Moderate EA	-0.650229
KYSE410_OESOPHAGUS	Esophageal Cancer	GNAS	CI PAN	Moderate EA	0.0581036
KYSE410_OESOPHAGUS	Esophageal Cancer	KRAS	CI PAN	Moderate EA	-0.787228
MELJUSO_SKIN	Skin Cancer	CHD8	CI PAN	Moderate EA	0.00104272
MELJUSO_SKIN	Skin Cancer	HRAS	CI PAN	Moderate EA	-0.993693
SNU349_KIDNEY	Kidney Cancer	MTOR	CI PAN	Moderate EA	-1.1959
SNU349_KIDNEY	Kidney Cancer	ZNF211	CI PAN	Moderate EA	0.326219
ESS1_ENDOMETRIUM	Endometrial Cancer	PIK3CA	CI PAN	Moderate EA	-0.598013
HT55_LARGE_INTESTINE	Colon Cancer	COL4A4	CI PAN	Moderate EA	-0.0491549
HT55_LARGE_INTESTINE	Colon Cancer	OR13D1	CI PAN	Moderate EA	0.124143
HT55_LARGE_INTESTINE	Colon Cancer	NRIP1	CI PAN	Moderate EA	0.0509635
NCIH23_LUNG	Lung NSCLC	ATF7IP	CI PAN	Moderate EA	-0.0547006
NCIH23_LUNG	Lung NSCLC	LZTR1	CI PAN	Moderate EA	-0.153218
NCIH23_LUNG	Lung NSCLC	EEF1A1	CI PAN	Moderate EA	-1.10182
NCIH23_LUNG	Lung NSCLC	KRAS	CI PAN	Moderate EA	-0.58727
TOV21G_OVARY	Ovarian Cancer	CTNNB1	CI PAN	Moderate EA	-0.216427
TOV21G_OVARY	Ovarian Cancer	KRAS	CI PAN	Moderate EA	-0.78163
TOV21G_OVARY	Ovarian Cancer	STAU2	CI PAN	Moderate EA	0.0440898
IGR1_SKIN	Skin Cancer	BRAF	CI PAN	Moderate EA	-0.723761
IGR1_SKIN	Skin Cancer	RAC1	CI PAN	Moderate EA	-0.820128
IGR1_SKIN	Skin Cancer	OR13D1	CI PAN	Moderate EA	0.17277
IGR1_SKIN	Skin Cancer	PPP2R2B	CI PAN	Moderate EA	0.00120265
NCIH2172_LUNG	Lung NSCLC	FBXL17	CI PAN	Moderate EA	0.0366613
NCIH2172_LUNG	Lung NSCLC	MEPCE	CI PAN	Moderate EA	-0.5965
NCIH2172_LUNG	Lung NSCLC	GNAS	CI PAN	Moderate EA	-0.0803787
NCIH1573_LUNG	Lung NSCLC	KEAP1	CI PAN	Moderate EA	-0.361866
NCIH1573_LUNG	Lung NSCLC	ATF7IP	CI PAN	Moderate EA	0.139077
NCIH1573_LUNG	Lung NSCLC	OR13D1	CI PAN	Moderate EA	0.185267
NCIH1573_LUNG	Lung NSCLC	NRAS	CI PAN	Moderate EA	-0.116498
NCIH1573_LUNG	Lung NSCLC	GNAS	CI PAN	Moderate EA	0.0457981
NCIH1573_LUNG	Lung NSCLC	KRAS	CI PAN	Moderate EA	-0.678116
SNU1_STOMACH	Gastric Cancer	IDH2	CI PAN	Moderate EA	-0.0817055
SNU1_STOMACH	Gastric Cancer	ZNF211	CI PAN	Moderate EA	0.16655
SNU1_STOMACH	Gastric Cancer	KRAS	CI PAN	Moderate EA	-1.36602
OVK18_OVARY	Ovarian Cancer	MTOR	CI PAN	Moderate EA	-1.15725
OVK18_OVARY	Ovarian Cancer	NOSTRIN	CI PAN	Moderate EA	0.057795
OVK18_OVARY	Ovarian Cancer	POU4F1	CI PAN	Moderate EA	0.100285
OVK18_OVARY	Ovarian Cancer	RGL2	CI PAN	Moderate EA	0.0668838
OVK18_OVARY	Ovarian Cancer	KRAS	CI PAN	Moderate EA	-0.48812
NALM6_HAEMATOPOIETIC_AND_LYMPHOID_TISSUE	Leukemia	KEAP1	CI PAN	Moderate EA	-0.285646
JHUEM1_ENDOMETRIUM	Endometrial Cancer	CHD8	CI PAN	Moderate EA	0.0320741
JHUEM1_ENDOMETRIUM	Endometrial Cancer	PPP2R2B	CI PAN	Moderate EA	0.0618201
JHUEM1_ENDOMETRIUM	Endometrial Cancer	PIK3CA	CI PAN	Moderate EA	-0.29583
JHUEM1_ENDOMETRIUM	Endometrial Cancer	GNAS	CI PAN	Moderate EA	-0.295412
COLO792_SKIN	Skin Cancer	MTOR	CI PAN	Moderate EA	-0.978648
COLO792_SKIN	Skin Cancer	ZNF814	CI PAN	Moderate EA	0.0353172
COLO792_SKIN	Skin Cancer	DNMT3A	CI PAN	Moderate EA	0.0171034
COLO792_SKIN	Skin Cancer	COL4A4	CI PAN	Moderate EA	0.0964856
HEC1B_ENDOMETRIUM	Endometrial Cancer	CHD8	CI PAN	Moderate EA	-0.0528901
HEC1B_ENDOMETRIUM	Endometrial Cancer	BRAF	CI PAN	Moderate EA	-0.0177375
HEC1B_ENDOMETRIUM	Endometrial Cancer	PIK3CA	CI PAN	Moderate EA	-0.661728
HEC1B_ENDOMETRIUM	Endometrial Cancer	KRAS	CI PAN	Moderate EA	-0.66577
REH_HAEMATOPOIETIC_AND_LYMPHOID_TISSUE	Leukemia	RAC1	CI PAN	Moderate EA	-0.473803
REH_HAEMATOPOIETIC_AND_LYMPHOID_TISSUE	Leukemia	COL4A4	CI PAN	Moderate EA	0.0532372
LS180_LARGE_INTESTINE	Colon Cancer	CTNNB1	CI PAN	Moderate EA	-0.982751
LS180_LARGE_INTESTINE	Colon Cancer	CBFB	CI PAN	Moderate EA	0.0755388
LS180_LARGE_INTESTINE	Colon Cancer	PIK3CA	CI PAN	Moderate EA	-0.483883
LS180_LARGE_INTESTINE	Colon Cancer	KRAS	CI PAN	Moderate EA	-0.820424
639V_URINARY_TRACT	Bladder Cancer	CTNNB1	CI PAN	Moderate EA	-0.269787
639V_URINARY_TRACT	Bladder Cancer	ATF7IP	CI PAN	Moderate EA	-0.0488017
639V_URINARY_TRACT	Bladder Cancer	COL4A4	CI PAN	Moderate EA	0.0288099
639V_URINARY_TRACT	Bladder Cancer	PIK3CA	CI PAN	Moderate EA	-0.191331
639V_URINARY_TRACT	Bladder Cancer	ZNF211	CI PAN	Moderate EA	0.0406062
639V_URINARY_TRACT	Bladder Cancer	GNAS	CI PAN	Moderate EA	-0.150246
639V_URINARY_TRACT	Bladder Cancer	KRAS	CI PAN	Moderate EA	-0.0274241
LOVO_LARGE_INTESTINE	Colon Cancer	ATF7IP	CI PAN	Moderate EA	-0.352196
LOVO_LARGE_INTESTINE	Colon Cancer	KRAS	CI PAN	Moderate EA	-0.547701
SUPT1_HAEMATOPOIETIC_AND_LYMPHOID_TISSUE	Leukemia/Lymphoma	MAPK1	CI PAN	Moderate EA	0.044235
SUPT1_HAEMATOPOIETIC_AND_LYMPHOID_TISSUE	Leukemia/Lymphoma	ZNF814	CI PAN	Moderate EA	0.0808415
SUPT1_HAEMATOPOIETIC_AND_LYMPHOID_TISSUE	Leukemia/Lymphoma	ATF7IP	CI PAN	Moderate EA	-0.308184
SUPT1_HAEMATOPOIETIC_AND_LYMPHOID_TISSUE	Leukemia/Lymphoma	LZTR1	CI PAN	Moderate EA	-0.0197731
SUPT1_HAEMATOPOIETIC_AND_LYMPHOID_TISSUE	Leukemia/Lymphoma	KLF5	CI PAN	Moderate EA	0.0107606
SUPT1_HAEMATOPOIETIC_AND_LYMPHOID_TISSUE	Leukemia/Lymphoma	PIK3CA	CI PAN	Moderate EA	-0.973013
SW48_LARGE_INTESTINE	Colon Cancer	GNAS	CI PAN	Moderate EA	-0.244808
CCK81_LARGE_INTESTINE	Colon Cancer	CTNNB1	CI PAN	Moderate EA	-1.34904
CCK81_LARGE_INTESTINE	Colon Cancer	EGFR	CI PAN	Moderate EA	-0.152701
CCK81_LARGE_INTESTINE	Colon Cancer	PIK3CA	CI PAN	Moderate EA	-0.537525
HEC151_ENDOMETRIUM	Endometrial Cancer	COL8A1	CI PAN	Moderate EA	-0.31435
HEC151_ENDOMETRIUM	Endometrial Cancer	PIK3CA	CI PAN	Moderate EA	-0.307798
HEC151_ENDOMETRIUM	Endometrial Cancer	MEPCE	CI PAN	Moderate EA	-0.879346
HEC151_ENDOMETRIUM	Endometrial Cancer	NRAS	CI PAN	Moderate EA	-0.506403
SNGM_ENDOMETRIUM	Endometrial Cancer	CCDC82	CI PAN	Moderate EA	0.233436
SNGM_ENDOMETRIUM	Endometrial Cancer	PIK3CA	CI PAN	Moderate EA	-0.257416
RKO_LARGE_INTESTINE	Colon Cancer	BRAF	CI PAN	Moderate EA	-0.696699
RKO_LARGE_INTESTINE	Colon Cancer	KEAP1	CI PAN	Moderate EA	-0.586315
RKO_LARGE_INTESTINE	Colon Cancer	EEF1A1	CI PAN	Moderate EA	-0.859989
RKO_LARGE_INTESTINE	Colon Cancer	KLF5	CI PAN	Moderate EA	0.0218643
RKO_LARGE_INTESTINE	Colon Cancer	PIK3CA	CI PAN	Moderate EA	-0.615579
RKO_LARGE_INTESTINE	Colon Cancer	DACH1	CI PAN	Moderate EA	-0.11056
RKO_LARGE_INTESTINE	Colon Cancer	GNAS	CI PAN	Moderate EA	0.0533588
KM12_LARGE_INTESTINE	Colon Cancer	MEPCE	CI PAN	Moderate EA	-0.822442
KM12_LARGE_INTESTINE	Colon Cancer	GNAS	CI PAN	Moderate EA	-0.118554
HEC1A_ENDOMETRIUM	Endometrial Cancer	CHD8	CI PAN	Moderate EA	-0.35909
HEC1A_ENDOMETRIUM	Endometrial Cancer	BRAF	CI PAN	Moderate EA	-0.139822
HEC1A_ENDOMETRIUM	Endometrial Cancer	ZNF814	CI PAN	Moderate EA	-0.102466
HEC1A_ENDOMETRIUM	Endometrial Cancer	COL4A4	CI PAN	Moderate EA	0.246193
HEC1A_ENDOMETRIUM	Endometrial Cancer	PIK3CA	CI PAN	Moderate EA	-0.769876
HEC1A_ENDOMETRIUM	Endometrial Cancer	2018-03-11	CI PAN	Moderate EA	-0.0859836
HEC1A_ENDOMETRIUM	Endometrial Cancer	KRAS	CI PAN	Moderate EA	-0.824287
PF382_HAEMATOPOIETIC_AND_LYMPHOID_TISSUE	Leukemia	CHD8	CI PAN	Moderate EA	-0.361287
PF382_HAEMATOPOIETIC_AND_LYMPHOID_TISSUE	Leukemia	CTNNB1	CI PAN	Moderate EA	0.208355
PF382_HAEMATOPOIETIC_AND_LYMPHOID_TISSUE	Leukemia	NRAS	CI PAN	Moderate EA	-0.76397
PF382_HAEMATOPOIETIC_AND_LYMPHOID_TISSUE	Leukemia	GNAS	CI PAN	Moderate EA	-0.295932
HEC6_ENDOMETRIUM	Endometrial Cancer	RAC1	CI PAN	Moderate EA	-0.663222
HEC6_ENDOMETRIUM	Endometrial Cancer	EGFR	CI PAN	Moderate EA	0.112458
HEC6_ENDOMETRIUM	Endometrial Cancer	COL8A1	CI PAN	Moderate EA	-0.163715
HEC6_ENDOMETRIUM	Endometrial Cancer	KRAS	CI PAN	Moderate EA	-0.267853
MFE319_ENDOMETRIUM	Endometrial Cancer	BRAF	CI PAN	Moderate EA	-0.130156
MFE319_ENDOMETRIUM	Endometrial Cancer	ATF7IP	CI PAN	Moderate EA	-0.365668
MFE319_ENDOMETRIUM	Endometrial Cancer	NFE2L2	CI PAN	Moderate EA	-0.370767
MFE319_ENDOMETRIUM	Endometrial Cancer	EEF1A1	CI PAN	Moderate EA	-0.794015
MFE319_ENDOMETRIUM	Endometrial Cancer	COL4A4	CI PAN	Moderate EA	0.159487
HT115_LARGE_INTESTINE	Colon Cancer	ATF7IP	CI PAN	Moderate EA	-0.432717
HT115_LARGE_INTESTINE	Colon Cancer	OR13D1	CI PAN	Moderate EA	-0.028785
HT115_LARGE_INTESTINE	Colon Cancer	SLC25A2	CI PAN	Moderate EA	-0.145645
HT115_LARGE_INTESTINE	Colon Cancer	PPP2R2B	CI PAN	Moderate EA	0.120026
HT115_LARGE_INTESTINE	Colon Cancer	KLF5	CI PAN	Moderate EA	-0.670928
HT115_LARGE_INTESTINE	Colon Cancer	PIK3CA	CI PAN	Moderate EA	-0.779586
HT115_LARGE_INTESTINE	Colon Cancer	2018-03-11	CI PAN	Moderate EA	0.344558
HT115_LARGE_INTESTINE	Colon Cancer	GNAS	CI PAN	Moderate EA	-0.0192002
EN_ENDOMETRIUM	Endometrial Cancer	MTOR	CI PAN	Moderate EA	-1.06268
EN_ENDOMETRIUM	Endometrial Cancer	SMTN	CI PAN	Moderate EA	-0.163377
EN_ENDOMETRIUM	Endometrial Cancer	SPOP	CI PAN	Moderate EA	-0.22716
EN_ENDOMETRIUM	Endometrial Cancer	PIK3CA	CI PAN	Moderate EA	-0.430895
EN_ENDOMETRIUM	Endometrial Cancer	MEPCE	CI PAN	Moderate EA	-0.577245
EN_ENDOMETRIUM	Endometrial Cancer	2018-03-11	CI PAN	Moderate EA	0.0880183
EN_ENDOMETRIUM	Endometrial Cancer	RBP1	CI PAN	Moderate EA	-0.0639027
HEC59_ENDOMETRIUM	Endometrial Cancer	MTOR	CI PAN	Moderate EA	-0.793955
HEC59_ENDOMETRIUM	Endometrial Cancer	CHD8	CI PAN	Moderate EA	-0.0190904
HEC59_ENDOMETRIUM	Endometrial Cancer	NFE2L2	CI PAN	Moderate EA	-0.346594
HEC59_ENDOMETRIUM	Endometrial Cancer	COL4A4	CI PAN	Moderate EA	0.0913695
HEC59_ENDOMETRIUM	Endometrial Cancer	RGL2	CI PAN	Moderate EA	-0.0779491
HEC59_ENDOMETRIUM	Endometrial Cancer	PIK3CA	CI PAN	Moderate EA	-0.11391
HEC59_ENDOMETRIUM	Endometrial Cancer	ACVR1B	CI PAN	Moderate EA	0.0108775
HEC59_ENDOMETRIUM	Endometrial Cancer	2018-03-11	CI PAN	Moderate EA	0.0373693
HEC251_ENDOMETRIUM	Endometrial Cancer	MTOR	CI PAN	Moderate EA	-0.807876
HEC251_ENDOMETRIUM	Endometrial Cancer	KEAP1	CI PAN	Moderate EA	-0.500013
HEC251_ENDOMETRIUM	Endometrial Cancer	ZNF814	CI PAN	Moderate EA	0.221822
HEC251_ENDOMETRIUM	Endometrial Cancer	PPP6C	CI PAN	Moderate EA	-0.642658
HEC251_ENDOMETRIUM	Endometrial Cancer	SLC25A2	CI PAN	Moderate EA	-0.0967861
HEC251_ENDOMETRIUM	Endometrial Cancer	PIK3CA	CI PAN	Moderate EA	-0.0314892
HEC251_ENDOMETRIUM	Endometrial Cancer	ZNF211	CI PAN	Moderate EA	0.335884
HEC251_ENDOMETRIUM	Endometrial Cancer	RBP1	CI PAN	Moderate EA	0.0188743
KPL1_BREAST	Breast Cancer	PIK3CA	CI IND (CA)	Moderate EA	-0.546919
JIMT1_BREAST	Breast Cancer	PIK3CA	CI IND (CA)	Moderate EA	-0.586393
EFM19_BREAST	Breast Cancer	PIK3CA	CI IND (CA)	Moderate EA	-0.774883
HCC1954_BREAST	Breast Cancer	PIK3CA	CI IND (CA)	Moderate EA	-0.567164
HCC202_BREAST	Breast Cancer	PIK3CA	CI IND (CA)	Moderate EA	-0.815743
CAL51_BREAST	Breast Cancer	PIK3CA	CI IND (CA)	Moderate EA	-0.853994
MDAMB453_BREAST	Breast Cancer	HS6ST1	CI IND (CA)	Moderate EA	-0.485893
MDAMB453_BREAST	Breast Cancer	PIK3CA	CI IND (CA)	Moderate EA	-0.832289
SIHA_CERVIX	Cervical Cancer	POLQ	CI IND (CA)	Moderate EA	-0.17538
NCIH747_LARGE_INTESTINE	Colon Cancer	KRAS	CI IND (CA)	Moderate EA	-1.07398
SW837_LARGE_INTESTINE	Colon Cancer	KRAS	CI IND (CA)	Moderate EA	-1.01075
COLO201_LARGE_INTESTINE	Colon Cancer	BRAF	CI IND (CA)	Moderate EA	-0.896512
CL40_LARGE_INTESTINE	Colon Cancer	KRAS	CI IND (CA)	Moderate EA	-1.36425
C2BBE1_LARGE_INTESTINE	Colon Cancer	CTNNB1	CI IND (CA)	Moderate EA	-0.636163
OUMS23_LARGE_INTESTINE	Colon Cancer	CDK12	CI IND (CA)	Moderate EA	-0.318371
OUMS23_LARGE_INTESTINE	Colon Cancer	BRAF	CI IND (CA)	Moderate EA	-0.426984
LS1034_LARGE_INTESTINE	Colon Cancer	KRAS	CI IND (CA)	Moderate EA	-0.806623
T84_LARGE_INTESTINE	Colon Cancer	PIK3CA	CI IND (CA)	Moderate EA	-0.702315
T84_LARGE_INTESTINE	Colon Cancer	KRAS	CI IND (CA)	Moderate EA	-0.906031
COLO678_LARGE_INTESTINE	Colon Cancer	KRAS	CI IND (CA)	Moderate EA	-0.93222
SW1463_LARGE_INTESTINE	Colon Cancer	KRAS	CI IND (CA)	Moderate EA	-0.952948
LS513_LARGE_INTESTINE	Colon Cancer	KRAS	CI IND (CA)	Moderate EA	-1.11023
HCC56_LARGE_INTESTINE	Colon Cancer	ATM	CI IND (CA)	Moderate EA	-0.0788502
NCIH716_LARGE_INTESTINE	Colon Cancer	KRAS	CI IND (CA)	Moderate EA	-0.755951
HT29_LARGE_INTESTINE	Colon Cancer	PIK3CA	CI IND (CA)	Moderate EA	-0.735684
HT29_LARGE_INTESTINE	Colon Cancer	BRAF	CI IND (CA)	Moderate EA	-0.887585
MDST8_LARGE_INTESTINE	Colon Cancer	BRAF	CI IND (CA)	Moderate EA	-0.782687
LS180_LARGE_INTESTINE	Colon Cancer	PIK3CA	CI IND (CA)	Moderate EA	-0.483883
LS180_LARGE_INTESTINE	Colon Cancer	KRAS	CI IND (CA)	Moderate EA	-0.820424
LS180_LARGE_INTESTINE	Colon Cancer	CTNNB1	CI IND (CA)	Moderate EA	-0.982751
LOVO_LARGE_INTESTINE	Colon Cancer	KRAS	CI IND (CA)	Moderate EA	-0.547701
CCK81_LARGE_INTESTINE	Colon Cancer	PIK3CA	CI IND (CA)	Moderate EA	-0.537525
CCK81_LARGE_INTESTINE	Colon Cancer	CTNNB1	CI IND (CA)	Moderate EA	-1.34904
RKO_LARGE_INTESTINE	Colon Cancer	PIK3CA	CI IND (CA)	Moderate EA	-0.615579
RKO_LARGE_INTESTINE	Colon Cancer	BRAF	CI IND (CA)	Moderate EA	-0.696699
RKO_LARGE_INTESTINE	Colon Cancer	PURG	CI IND (CA)	Moderate EA	0.0602088
KM12_LARGE_INTESTINE	Colon Cancer	ATM	CI IND (CA)	Moderate EA	-0.119008
KM12_LARGE_INTESTINE	Colon Cancer	IFFO1	CI IND (CA)	Moderate EA	0.01422
KM12_LARGE_INTESTINE	Colon Cancer	ZNF862	CI IND (CA)	Moderate EA	-0.11121
HT115_LARGE_INTESTINE	Colon Cancer	PIK3CA	CI IND (CA)	Moderate EA	-0.779586
HT115_LARGE_INTESTINE	Colon Cancer	ARHGAP5	CI IND (CA)	Moderate EA	-0.254506
HT115_LARGE_INTESTINE	Colon Cancer	CDK12	CI IND (CA)	Moderate EA	-0.186202
DETROIT562_UPPER_AERODIGESTIVE_TRACT	Head and Neck Cancer	PIK3CA	CI IND (CA)	Moderate EA	-0.832243
BICR16_UPPER_AERODIGESTIVE_TRACT	Head and Neck Cancer	NFE2L2	CI IND (CA)	Moderate EA	-0.766753
CAL33_UPPER_AERODIGESTIVE_TRACT	Head and Neck Cancer	PIK3CA	CI IND (CA)	Moderate EA	-0.790191
HSC2_UPPER_AERODIGESTIVE_TRACT	Head and Neck Cancer	PIK3CA	CI IND (CA)	Moderate EA	-0.907493
HSC2_UPPER_AERODIGESTIVE_TRACT	Head and Neck Cancer	RAC1	CI IND (CA)	Moderate EA	-0.367928
SNU398_LIVER	Liver Cancer	CTNNB1	CI IND (CA)	Moderate EA	-1.00635
MALME3M_SKIN	Skin Cancer	BRAF	CI IND (CA)	Moderate EA	-1.76428
HT144_SKIN	Skin Cancer	BRAF	CI IND (CA)	Moderate EA	-1.04855
RPMI7951_SKIN	Skin Cancer	BRAF	CI IND (CA)	Moderate EA	-0.432768
K029AX_SKIN	Skin Cancer	BRAF	CI IND (CA)	Moderate EA	-0.664909
C32_SKIN	Skin Cancer	BRAF	CI IND (CA)	Moderate EA	-0.818672
MELHO_SKIN	Skin Cancer	BRAF	CI IND (CA)	Moderate EA	-1.09994
MELHO_SKIN	Skin Cancer	COL4A4	CI IND (CA)	Moderate EA	-0.00806763
COLO800_SKIN	Skin Cancer	BRAF	CI IND (CA)	Moderate EA	-0.831934
COLO800_SKIN	Skin Cancer	OR51A4	CI IND (CA)	Moderate EA	0.12128
WM983B_SKIN	Skin Cancer	BRAF	CI IND (CA)	Moderate EA	-1.27924
HS944T_SKIN	Skin Cancer	NRAS	CI IND (CA)	Moderate EA	-1.1846
UACC62_SKIN	Skin Cancer	BRAF	CI IND (CA)	Moderate EA	-1.24794
WM1799_SKIN	Skin Cancer	BRAF	CI IND (CA)	Moderate EA	-0.976231
WM1799_SKIN	Skin Cancer	CTNNB1	CI IND (CA)	Moderate EA	-0.32802
RVH421_SKIN	Skin Cancer	BRAF	CI IND (CA)	Moderate EA	-1.27113
RVH421_SKIN	Skin Cancer	ZNF211	CI IND (CA)	Moderate EA	0.255114
WM2664_SKIN	Skin Cancer	BRAF	CI IND (CA)	Moderate EA	-1.00817
WM115_SKIN	Skin Cancer	BRAF	CI IND (CA)	Moderate EA	-1.10529
IGR39_SKIN	Skin Cancer	BRAF	CI IND (CA)	Moderate EA	-0.784058
UACC257_SKIN	Skin Cancer	BRAF	CI IND (CA)	Moderate EA	-1.02114
WM793_SKIN	Skin Cancer	BRAF	CI IND (CA)	Moderate EA	-0.981121
WM793_SKIN	Skin Cancer	COL4A4	CI IND (CA)	Moderate EA	0.14814
HS695T_SKIN	Skin Cancer	BRAF	CI IND (CA)	Moderate EA	-1.05294
HS695T_SKIN	Skin Cancer	OR51A4	CI IND (CA)	Moderate EA	0.194393
SKMEL24_SKIN	Skin Cancer	DACH1	CI IND (CA)	Moderate EA	-0.0246544
SKMEL24_SKIN	Skin Cancer	BRAF	CI IND (CA)	Moderate EA	-0.676921
SKMEL24_SKIN	Skin Cancer	COL19A1	CI IND (CA)	Moderate EA	-0.0113875
SKMEL30_SKIN	Skin Cancer	NRAS	CI IND (CA)	Moderate EA	-1.12396
A2058_SKIN	Skin Cancer	BRAF	CI IND (CA)	Moderate EA	-0.657052
MDAMB435S_SKIN	Skin Cancer	BRAF	CI IND (CA)	Moderate EA	-0.862427
COLO679_SKIN	Skin Cancer	COL4A3	CI IND (CA)	Moderate EA	0.0412935
COLO679_SKIN	Skin Cancer	BRAF	CI IND (CA)	Moderate EA	-0.883168
MELJUSO_SKIN	Skin Cancer	SOS2	CI IND (CA)	Moderate EA	-0.0593794
IGR1_SKIN	Skin Cancer	BRAF	CI IND (CA)	Moderate EA	-0.723761
IGR1_SKIN	Skin Cancer	RAC1	CI IND (CA)	Moderate EA	-0.820128
COLO792_SKIN	Skin Cancer	COL4A4	CI IND (CA)	Moderate EA	0.0964856
COLO792_SKIN	Skin Cancer	TEP1	CI IND (CA)	Moderate EA	0.0565387
8305C_THYROID	Thyroid Cancer	BRAF	CI IND (CA)	Moderate EA	-1.0015
KLE_ENDOMETRIUM	Endometrial Cancer	FBXW7	CI IND (CA)	Moderate EA	-0.400024
TEN_ENDOMETRIUM	Endometrial Cancer	KRAS	CI IND (CA)	Moderate EA	-0.419567
HEC50B_ENDOMETRIUM	Endometrial Cancer	KRAS	CI IND (CA)	Moderate EA	-0.543131
ESS1_ENDOMETRIUM	Endometrial Cancer	REV3L	CI IND (CA)	Moderate EA	-0.685404
ESS1_ENDOMETRIUM	Endometrial Cancer	PIK3CA	CI IND (CA)	Moderate EA	-0.598013
JHUEM1_ENDOMETRIUM	Endometrial Cancer	PIK3CA	CI IND (CA)	Moderate EA	-0.29583
HEC1B_ENDOMETRIUM	Endometrial Cancer	PIK3CA	CI IND (CA)	Moderate EA	-0.661728
HEC1B_ENDOMETRIUM	Endometrial Cancer	KRAS	CI IND (CA)	Moderate EA	-0.66577
HEC151_ENDOMETRIUM	Endometrial Cancer	PIK3CA	CI IND (CA)	Moderate EA	-0.307798
HEC151_ENDOMETRIUM	Endometrial Cancer	ZNF180	CI IND (CA)	Moderate EA	-0.0176859
HEC151_ENDOMETRIUM	Endometrial Cancer	FGFR2	CI IND (CA)	Moderate EA	0.287306
SNGM_ENDOMETRIUM	Endometrial Cancer	PIK3CA	CI IND (CA)	Moderate EA	-0.257416
SNGM_ENDOMETRIUM	Endometrial Cancer	CCDC82	CI IND (CA)	Moderate EA	0.233436
HEC1A_ENDOMETRIUM	Endometrial Cancer	PIK3CA	CI IND (CA)	Moderate EA	-0.769876
HEC1A_ENDOMETRIUM	Endometrial Cancer	KRAS	CI IND (CA)	Moderate EA	-0.824287
HEC6_ENDOMETRIUM	Endometrial Cancer	KRAS	CI IND (CA)	Moderate EA	-0.267853
MFE319_ENDOMETRIUM	Endometrial Cancer	FGFR2	CI IND (CA)	Moderate EA	0.112876
EN_ENDOMETRIUM	Endometrial Cancer	REV3L	CI IND (CA)	Moderate EA	-0.776537
EN_ENDOMETRIUM	Endometrial Cancer	PIK3CA	CI IND (CA)	Moderate EA	-0.430895
EN_ENDOMETRIUM	Endometrial Cancer	FGFR2	CI IND (CA)	Moderate EA	-0.0990263
EN_ENDOMETRIUM	Endometrial Cancer	ZNF471	CI IND (CA)	Moderate EA	0.161147
HEC59_ENDOMETRIUM	Endometrial Cancer	PIK3CA	CI IND (CA)	Moderate EA	-0.11391
HEC59_ENDOMETRIUM	Endometrial Cancer	FGFR2	CI IND (CA)	Moderate EA	0.00450129
HEC251_ENDOMETRIUM	Endometrial Cancer	REV3L	CI IND (CA)	Moderate EA	-0.762249
HEC251_ENDOMETRIUM	Endometrial Cancer	PIK3CA	CI IND (CA)	Moderate EA	-0.0314892
HEC251_ENDOMETRIUM	Endometrial Cancer	ZNF180	CI IND (CA)	Moderate EA	0.0785755
HEC251_ENDOMETRIUM	Endometrial Cancer	FBXW7	CI IND (CA)	Moderate EA	-0.49899
HEC251_ENDOMETRIUM	Endometrial Cancer	DYRK1A	CI IND (CA)	Moderate EA	-0.135597
HEC251_ENDOMETRIUM	Endometrial Cancer	ZNF471	CI IND (CA)	Moderate EA	0.326724
COV504_OVARY	Ovarian Cancer	RANBP2	Random	Moderate EA	-0.51668
HT1080_SOFT_TISSUE	Soft Tissue Sarcoma	ERCC5	Random	Moderate EA	-0.00340951
COGE352_BONE	Ewing\'s Sarcoma	LAMA2	Random	Moderate EA	-0.0763644
U87MG_CENTRAL_NERVOUS_SYSTEM	GBM/Brain Cancer	RFWD3	Random	Moderate EA	-0.413076
COGN278_AUTONOMIC_GANGLIA	Neuroblastoma	XIRP2	Random	Moderate EA	0.143568
BIN67_OVARY	Ovarian Cancer	ZNF292	Random	Moderate EA	0.0996996
U118MG_CENTRAL_NERVOUS_SYSTEM	GBM/Brain Cancer	XIRP2	Random	Moderate EA	0.00808344
U118MG_CENTRAL_NERVOUS_SYSTEM	GBM/Brain Cancer	RASGEF1C	Random	Moderate EA	0.0132991
BICR31_UPPER_AERODIGESTIVE_TRACT	Head and Neck Cancer	XIRP2	Random	Moderate EA	0.156912
MHHNB11_AUTONOMIC_GANGLIA	Neuroblastoma	UBR3	Random	Moderate EA	-0.311789
HLF_LIVER	Liver Cancer	AASDH	Random	Moderate EA	0.0116561
CAKI1_KIDNEY	Kidney Cancer	PCDHB2	Random	Moderate EA	-0.0793639
SLR26_KIDNEY	Kidney Cancer	PPFIBP2	Random	Moderate EA	0.101713
COGN305_AUTONOMIC_GANGLIA	Neuroblastoma	ST3GAL3	Random	Moderate EA	-0.0633183
JR_SOFT_TISSUE	Rhabdomyosarcoma	FGF8	Random	Moderate EA	-0.739234
KLE_ENDOMETRIUM	Endometrial Cancer	CEP192	Random	Moderate EA	-0.547813
T24_URINARY_TRACT	Bladder Cancer	XIRP2	Random	Moderate EA	0.130286
CHLA266_SOFT_TISSUE	Rhabdoid tumor	LAMA4	Random	Moderate EA	0.0112481
CHLA266_SOFT_TISSUE	Rhabdoid tumor	ATP1A4	Random	Moderate EA	-0.0651471
JIMT1_BREAST	Breast Cancer	XIRP2	Random	Moderate EA	0.112187
JIMT1_BREAST	Breast Cancer	LIMD1	Random	Moderate EA	-0.268734
BT549_BREAST	Breast Cancer	ZNF292	Random	Moderate EA	0.0236602
COV318_OVARY	Ovarian Cancer	ZNF292	Random	Moderate EA	-0.020588
PEDS005TPFAD_KIDNEY	Kidney Cancer	C3	Random	Moderate EA	0.0567944
TCCPAN2_PANCREAS	Pancreatic Cancer	WSCD1	Random	Moderate EA	0.137863
42MGBA_CENTRAL_NERVOUS_SYSTEM	Brain Cancer	TTC28	Random	Moderate EA	-0.088619
T98G_CENTRAL_NERVOUS_SYSTEM	Brain Cancer	CCNA2	Random	Moderate EA	-0.915525
SCS214_SOFT_TISSUE	Soft Tissue Sarcoma	TOM1	Random	Moderate EA	-0.150477
CJM_SKIN	Skin Cancer	PPFIBP2	Random	Moderate EA	0.28086
JHOC5_OVARY	Ovarian Cancer	RANBP2	Random	Moderate EA	-0.46378
PECAPJ41CLONED2_UPPER_AERODIGESTIVE_TRACT	Head and Neck Cancer	RANBP2	Random	Moderate EA	-0.475871
SNU1105_CENTRAL_NERVOUS_SYSTEM	Brain Cancer	XIRP2	Random	Moderate EA	0.0911531
NH6_AUTONOMIC_GANGLIA	Neuroblastoma	UBR3	Random	Moderate EA	-0.797616
YAPC_PANCREAS	Pancreatic Cancer	ERCC5	Random	Moderate EA	0.0495126
UMUC1_URINARY_TRACT	Bladder Cancer	SPARC	Random	Moderate EA	0.104901
UPCISCC152_UPPER_AERODIGESTIVE_TRACT	Head and Neck Cancer	TNFRSF10C	Random	Moderate EA	0.191209
SR786_HAEMATOPOIETIC_AND_LYMPHOID_TISSUE	Lymphoma	SPAM1	Random	Moderate EA	0.0498028
KMRC20_KIDNEY	Kidney Cancer	SLC26A9	Random	Moderate EA	-0.0306063
NB4_HAEMATOPOIETIC_AND_LYMPHOID_TISSUE	Leukemia	SLC26A9	Random	Moderate EA	0.00299696
NB4_HAEMATOPOIETIC_AND_LYMPHOID_TISSUE	Leukemia	CDH11	Random	Moderate EA	0.0357569
HEYA8_OVARY	Ovarian Cancer	TP53BP1	Random	Moderate EA	-0.11506
TUHR14TKB_KIDNEY	Kidney Cancer	DCAF12	Random	Moderate EA	-0.06887
COV644_OVARY	Ovarian Cancer	SORCS1	Random	Moderate EA	0.0370994
SNU398_LIVER	Liver Cancer	LAMA2	Random	Moderate EA	-0.0293873
OSRC2_KIDNEY	Kidney Cancer	SARS2	Random	Moderate EA	-0.313403
KP4_PANCREAS	Pancreatic Cancer	SLC13A1	Random	Moderate EA	0.209343
HCC1937_BREAST	Breast Cancer	C3	Random	Moderate EA	-0.00419923
SNU182_LIVER	Liver Cancer	XIRP2	Random	Moderate EA	-0.0705475
SNU182_LIVER	Liver Cancer	ERCC5	Random	Moderate EA	-0.0688437
RCC10RGB_KIDNEY	Kidney Cancer	RFWD3	Random	Moderate EA	-0.372192
KNS81_CENTRAL_NERVOUS_SYSTEM	Brain Cancer	C3	Random	Moderate EA	0.0504093
LMSU_STOMACH	Gastric Cancer	KCTD8	Random	Moderate EA	-0.0260263
LMSU_STOMACH	Gastric Cancer	RANBP2	Random	Moderate EA	-0.451584
DU4475_BREAST	Breast Cancer	MLLT10	Random	Moderate EA	-0.327503
BICR22_UPPER_AERODIGESTIVE_TRACT	Head and Neck Cancer	XIRP2	Random	Moderate EA	0.129885
GCIY_STOMACH	Gastric Cancer	XIRP2	Random	Moderate EA	0.0160747
U937_HAEMATOPOIETIC_AND_LYMPHOID_TISSUE	Lymphoma	DPPA3	Random	Moderate EA	-0.228655
TEN_ENDOMETRIUM	Endometrial Cancer	TTC28	Random	Moderate EA	-0.0346403
JHOS2_OVARY	Ovarian Cancer	ACO2	Random	Moderate EA	-0.199198
H4_CENTRAL_NERVOUS_SYSTEM	Brain Cancer	DEAF1	Random	Moderate EA	0.220276
TE8_OESOPHAGUS	Esophageal Cancer	LAMA2	Random	Moderate EA	-0.0494626
TE8_OESOPHAGUS	Esophageal Cancer	TP53BP1	Random	Moderate EA	-0.217975
TE8_OESOPHAGUS	Esophageal Cancer	RANBP2	Random	Moderate EA	-0.523587
GSU_STOMACH	Gastric Cancer	PCDHB2	Random	Moderate EA	-0.0449144
HT1376_URINARY_TRACT	Bladder Cancer	DPPA3	Random	Moderate EA	-0.0456918
KURAMOCHI_OVARY	Ovarian Cancer	ERCC5	Random	Moderate EA	-0.00568836
JHH4_LIVER	Liver Cancer	SORCS1	Random	Moderate EA	0.233538
MELHO_SKIN	Skin Cancer	RANBP2	Random	Moderate EA	-0.452334
DB_HAEMATOPOIETIC_AND_LYMPHOID_TISSUE	Lymphoma	DPH2	Random	Moderate EA	-0.267681
DB_HAEMATOPOIETIC_AND_LYMPHOID_TISSUE	Lymphoma	SLC13A1	Random	Moderate EA	0.308458
KU1919_URINARY_TRACT	Bladder Cancer	EFHD1	Random	Moderate EA	0.080208
COLO800_SKIN	Skin Cancer	LAIR1	Random	Moderate EA	-0.194467
OUMS23_LARGE_INTESTINE	Colon Cancer	CDH11	Random	Moderate EA	0.137705
OUMS23_LARGE_INTESTINE	Colon Cancer	ST3GAL3	Random	Moderate EA	-0.25354
TCCSUP_URINARY_TRACT	Bladder Cancer	LAMA2	Random	Moderate EA	-0.0368364
TCCSUP_URINARY_TRACT	Bladder Cancer	RAB20	Random	Moderate EA	-0.0316718
TF1_HAEMATOPOIETIC_AND_LYMPHOID_TISSUE	Leukemia	TP53BP1	Random	Moderate EA	-0.246744
NCIH2030_LUNG	Lung NSCLC	SORCS1	Random	Moderate EA	0.134776
LS1034_LARGE_INTESTINE	Colon Cancer	XIRP2	Random	Moderate EA	0.312233
LS1034_LARGE_INTESTINE	Colon Cancer	LIMD1	Random	Moderate EA	-0.270496
LS1034_LARGE_INTESTINE	Colon Cancer	C3	Random	Moderate EA	0.0948208
HS944T_SKIN	Skin Cancer	XIRP2	Random	Moderate EA	-0.0396178
OVCAR8_OVARY	Ovarian Cancer	KLHL33	Random	Moderate EA	-0.0621845
UACC62_SKIN	Skin Cancer	TP53BP1	Random	Moderate EA	0.392969
UACC62_SKIN	Skin Cancer	RAB11FIP5	Random	Moderate EA	0.0630782
UACC62_SKIN	Skin Cancer	XIRP2	Random	Moderate EA	0.0161679
KNS42_CENTRAL_NERVOUS_SYSTEM	Brain Cancer	OLAH	Random	Moderate EA	-0.0190531
KNS42_CENTRAL_NERVOUS_SYSTEM	Brain Cancer	PCDHB2	Random	Moderate EA	-0.336428
T84_LARGE_INTESTINE	Colon Cancer	RANBP2	Random	Moderate EA	-0.567096
WM1799_SKIN	Skin Cancer	TP53BP1	Random	Moderate EA	0.0715466
JHOS4_OVARY	Ovarian Cancer	RPS2	Random	Moderate EA	-1.05424
SMZ1_HAEMATOPOIETIC_AND_LYMPHOID_TISSUE	Lymphoma	LAMA4	Random	Moderate EA	-0.0393796
NCIH460_LUNG	Lung NSCLC	SPAM1	Random	Moderate EA	0.112789
COLO678_LARGE_INTESTINE	Colon Cancer	FGF8	Random	Moderate EA	0.0576902
COLO678_LARGE_INTESTINE	Colon Cancer	RANBP2	Random	Moderate EA	-0.723439
HUH6_LIVER	Liver Cancer	LHX9	Random	Moderate EA	0.124076
JMSU1_URINARY_TRACT	Bladder Cancer	XIRP2	Random	Moderate EA	0.0821723
RVH421_SKIN	Skin Cancer	RANBP2	Random	Moderate EA	-0.468287
LCLC103H_LUNG	Lung NSCLC	PCDHB2	Random	Moderate EA	-0.183251
NCIH2170_LUNG	Lung NSCLC	LAMA2	Random	Moderate EA	0.0685292
KMS34_HAEMATOPOIETIC_AND_LYMPHOID_TISSUE	Multiple Myeloma	RFWD3	Random	Moderate EA	-0.678362
SUIT2_PANCREAS	Pancreatic Cancer	CHMP1B	Random	Moderate EA	0.214575
PK45H_PANCREAS	Pancreatic Cancer	DPPA3	Random	Moderate EA	-0.334531
EPLC272H_LUNG	Lung NSCLC	PPFIBP2	Random	Moderate EA	0.018096
EPLC272H_LUNG	Lung NSCLC	RANBP2	Random	Moderate EA	-0.58994
JHH1_LIVER	Liver Cancer	XIRP2	Random	Moderate EA	0.0429794
JHH1_LIVER	Liver Cancer	MFSD11	Random	Moderate EA	-0.026799
JHH1_LIVER	Liver Cancer	RANBP2	Random	Moderate EA	-0.530191
HSC2_UPPER_AERODIGESTIVE_TRACT	Head and Neck Cancer	SORCS1	Random	Moderate EA	0.0441379
IGR39_SKIN	Skin Cancer	XIRP2	Random	Moderate EA	0.0543721
L82_HAEMATOPOIETIC_AND_LYMPHOID_TISSUE	Lymphoma	MIPOL1	Random	Moderate EA	-0.415926
TE6_OESOPHAGUS	Esophageal Cancer	DCAF12	Random	Moderate EA	-0.0109697
TE6_OESOPHAGUS	Esophageal Cancer	MLLT10	Random	Moderate EA	0.0165193
BHY_UPPER_AERODIGESTIVE_TRACT	Head and Neck Cancer	IRX2	Random	Moderate EA	-0.00848289
BHY_UPPER_AERODIGESTIVE_TRACT	Head and Neck Cancer	TTC28	Random	Moderate EA	-0.14431
CAL27_UPPER_AERODIGESTIVE_TRACT	Head and Neck Cancer	LAMTOR4	Random	Moderate EA	-0.222125
MDAMB468_BREAST	Breast Cancer	SARS2	Random	Moderate EA	-0.87051
MCAS_OVARY	Ovarian Cancer	LAMA2	Random	Moderate EA	-0.0477953
MCAS_OVARY	Ovarian Cancer	TP53BP1	Random	Moderate EA	-0.226249
KE39_STOMACH	Gastric Cancer	RFWD3	Random	Moderate EA	-0.14595
KE39_STOMACH	Gastric Cancer	ZNF292	Random	Moderate EA	0.175157
HMC18_BREAST	Breast Cancer	XIRP2	Random	Moderate EA	-0.0331316
SNU503_LARGE_INTESTINE	Colon Cancer	SORCS1	Random	Moderate EA	0.0497213
NCIH1299_LUNG	Lung NSCLC	PCDHB2	Random	Moderate EA	-0.0592351
NCIH1299_LUNG	Lung NSCLC	XIRP2	Random	Moderate EA	0.0280527
UACC257_SKIN	Skin Cancer	AADACL3	Random	Moderate EA	0.124014
RH30_SOFT_TISSUE	Rhabdomyosarcoma	ZNF292	Random	Moderate EA	-0.113971
RH30_SOFT_TISSUE	Rhabdomyosarcoma	RANBP2	Random	Moderate EA	-0.346667
SCABER_URINARY_TRACT	Bladder Cancer	ZFAND3	Random	Moderate EA	-0.244491
SCABER_URINARY_TRACT	Bladder Cancer	PPFIBP2	Random	Moderate EA	0.118709
NCIH1944_LUNG	Lung NSCLC	WSCD1	Random	Moderate EA	0.183673
NCIH1944_LUNG	Lung NSCLC	WDR43	Random	Moderate EA	-1.49085
NCIH1944_LUNG	Lung NSCLC	TTC28	Random	Moderate EA	-0.0762758
ABC1_LUNG	Lung NSCLC	LAMA2	Random	Moderate EA	0.000228341
HSC3_UPPER_AERODIGESTIVE_TRACT	Head and Neck Cancer	MLLT10	Random	Moderate EA	-0.0636662
YD38_UPPER_AERODIGESTIVE_TRACT	Head and Neck Cancer	ZG16B	Random	Moderate EA	0.235514
YD38_UPPER_AERODIGESTIVE_TRACT	Head and Neck Cancer	XIRP2	Random	Moderate EA	0.207835
YD38_UPPER_AERODIGESTIVE_TRACT	Head and Neck Cancer	RANBP2	Random	Moderate EA	-0.598301
647V_URINARY_TRACT	Bladder Cancer	SORCS1	Random	Moderate EA	0.0176528
647V_URINARY_TRACT	Bladder Cancer	TOM1	Random	Moderate EA	-0.218703
JHH5_LIVER	Liver Cancer	IRX2	Random	Moderate EA	0.129364
FU97_STOMACH	Gastric Cancer	CYP7A1	Random	Moderate EA	0.0311452
WM793_SKIN	Skin Cancer	XIRP2	Random	Moderate EA	0.159723
TE5_OESOPHAGUS	Esophageal Cancer	LAMA2	Random	Moderate EA	0.077494
5637_URINARY_TRACT	Bladder Cancer	XIRP2	Random	Moderate EA	0.0858578
5637_URINARY_TRACT	Bladder Cancer	RANBP2	Random	Moderate EA	-0.547876
GB1_CENTRAL_NERVOUS_SYSTEM	Brain Cancer	RFWD3	Random	Moderate EA	-0.248526
NCIH838_LUNG	Lung NSCLC	ATP1A4	Random	Moderate EA	-0.0537962
HOP62_LUNG	Lung NSCLC	ACO2	Random	Moderate EA	-0.109533
HOP62_LUNG	Lung NSCLC	LAMA4	Random	Moderate EA	-0.0692849
HOP62_LUNG	Lung NSCLC	TTC28	Random	Moderate EA	-0.0142926
RPMI8226_HAEMATOPOIETIC_AND_LYMPHOID_TISSUE	Multiple Myeloma	LAMA2	Random	Moderate EA	-0.0608193
RPMI8226_HAEMATOPOIETIC_AND_LYMPHOID_TISSUE	Multiple Myeloma	LIMD1	Random	Moderate EA	-0.373233
RPMI8226_HAEMATOPOIETIC_AND_LYMPHOID_TISSUE	Multiple Myeloma	SLC13A1	Random	Moderate EA	0.237332
EJM_HAEMATOPOIETIC_AND_LYMPHOID_TISSUE	Multiple Myeloma	SARS2	Random	Moderate EA	-0.46415
SH10TC_STOMACH	Gastric Cancer	ATP1A4	Random	Moderate EA	-0.0493793
NCIH441_LUNG	Lung NSCLC	EFHD1	Random	Moderate EA	0.267936
NCIH441_LUNG	Lung NSCLC	ERCC5	Random	Moderate EA	-0.00772352
A2780_OVARY	Ovarian Cancer	XIRP2	Random	Moderate EA	0.211631
A549_LUNG	Lung NSCLC	TTC28	Random	Moderate EA	-0.162578
NCIH1648_LUNG	Lung NSCLC	MLLT10	Random	Moderate EA	0.344557
NCIH1648_LUNG	Lung NSCLC	XIRP2	Random	Moderate EA	0.094744
HEC50B_ENDOMETRIUM	Endometrial Cancer	LAMA2	Random	Moderate EA	0.129378
HEC50B_ENDOMETRIUM	Endometrial Cancer	CDK5RAP1	Random	Moderate EA	-0.196645
HEC50B_ENDOMETRIUM	Endometrial Cancer	RANBP2	Random	Moderate EA	-0.333677
KMBC2_URINARY_TRACT	Bladder Cancer	WDR43	Random	Moderate EA	-1.49392
KMBC2_URINARY_TRACT	Bladder Cancer	LYG2	Random	Moderate EA	0.0811003
AU565_BREAST	Breast Cancer	MLLT10	Random	Moderate EA	0.229857
AU565_BREAST	Breast Cancer	TTC28	Random	Moderate EA	0.023866
NCIH2291_LUNG	Lung NSCLC	XIRP2	Random	Moderate EA	0.0521589
NCIH2291_LUNG	Lung NSCLC	RANBP2	Random	Moderate EA	-0.361757
KYSE70_OESOPHAGUS	Esophageal Cancer	SLC17A7	Random	Moderate EA	0.0562052
KYSE70_OESOPHAGUS	Esophageal Cancer	XIRP2	Random	Moderate EA	0.0949089
LN18_CENTRAL_NERVOUS_SYSTEM	Brain Cancer	ST3GAL3	Random	Moderate EA	0.0112733
LN18_CENTRAL_NERVOUS_SYSTEM	Brain Cancer	RANBP2	Random	Moderate EA	-0.702354
ES2_OVARY	Ovarian Cancer	PPFIBP2	Random	Moderate EA	0.040096
KIJK_HAEMATOPOIETIC_AND_LYMPHOID_TISSUE	Lymphoma	XIRP2	Random	Moderate EA	0.11105
KIJK_HAEMATOPOIETIC_AND_LYMPHOID_TISSUE	Lymphoma	LAMA4	Random	Moderate EA	0.0518546
KIJK_HAEMATOPOIETIC_AND_LYMPHOID_TISSUE	Lymphoma	CYP7A1	Random	Moderate EA	-0.0707135
NCIH322_LUNG	Lung NSCLC	SAG	Random	Moderate EA	0.0800003
NCIH322_LUNG	Lung NSCLC	XIRP2	Random	Moderate EA	-0.0108467
NCIH2087_LUNG	Lung NSCLC	LHX9	Random	Moderate EA	0.0250266
NCIH2087_LUNG	Lung NSCLC	IRX2	Random	Moderate EA	0.224319
NCIH2087_LUNG	Lung NSCLC	DDX6	Random	Moderate EA	-0.598655
COLO679_SKIN	Skin Cancer	MFSD11	Random	Moderate EA	-0.136746
COLO679_SKIN	Skin Cancer	OR10G9	Random	Moderate EA	-0.122934
SKOV3_OVARY	Ovarian Cancer	SLC2A5	Random	Moderate EA	-0.0846585
CHAGOK1_LUNG	Lung NSCLC	IRX2	Random	Moderate EA	-0.0342102
CHAGOK1_LUNG	Lung NSCLC	ATP1A4	Random	Moderate EA	0.00730118
KMS11_HAEMATOPOIETIC_AND_LYMPHOID_TISSUE	Multiple Myeloma	C3	Random	Moderate EA	-0.101747
HGC27_STOMACH	Gastric Cancer	GJD2	Random	Moderate EA	0.193757
HGC27_STOMACH	Gastric Cancer	SLC13A1	Random	Moderate EA	0.139925
MORCPR_LUNG	Lung NSCLC	ZNF292	Random	Moderate EA	-0.149982
P31FUJ_HAEMATOPOIETIC_AND_LYMPHOID_TISSUE	Leukemia	LAMA2	Random	Moderate EA	0.0292496
KYSE450_OESOPHAGUS	Esophageal Cancer	ATP1A4	Random	Moderate EA	0.0993546
KYSE450_OESOPHAGUS	Esophageal Cancer	C3	Random	Moderate EA	0.015273
NCIH2126_LUNG	Lung NSCLC	LAMA2	Random	Moderate EA	-0.0303739
NCIH2126_LUNG	Lung NSCLC	OR4K5	Random	Moderate EA	0.0803849
NCIH2126_LUNG	Lung NSCLC	XIRP2	Random	Moderate EA	0.0637333
NCIH2126_LUNG	Lung NSCLC	OR10G9	Random	Moderate EA	0.00968256
NB1_AUTONOMIC_GANGLIA	Neuroblastoma	LAMA4	Random	Moderate EA	0.107939
NB1_AUTONOMIC_GANGLIA	Neuroblastoma	PPFIBP2	Random	Moderate EA	0.187304
NB1_AUTONOMIC_GANGLIA	Neuroblastoma	TTC28	Random	Moderate EA	-0.0646218
NB1_AUTONOMIC_GANGLIA	Neuroblastoma	CYP7A1	Random	Moderate EA	-0.0588091
MDAMB415_BREAST	Breast Cancer	MLLT10	Random	Moderate EA	0.280593
GCT_SOFT_TISSUE	Soft Tissue/Bone Cancer	PCDHB2	Random	Moderate EA	-0.0135107
JHH7_LIVER	Liver Cancer	MLLT10	Random	Moderate EA	0.00463245
JHH7_LIVER	Liver Cancer	RANBP2	Random	Moderate EA	-0.682365
AGS_STOMACH	Gastric Cancer	C3	Random	Moderate EA	0.156054
NCIH1568_LUNG	Lung NSCLC	WSCD1	Random	Moderate EA	0.117833
KYSE30_OESOPHAGUS	Esophageal Cancer	SPAM1	Random	Moderate EA	0.141892
KYSE30_OESOPHAGUS	Esophageal Cancer	GPBP1L1	Random	Moderate EA	-0.15802
KYSE30_OESOPHAGUS	Esophageal Cancer	DEAF1	Random	Moderate EA	0.119356
HCC15_LUNG	Lung NSCLC	KLHL33	Random	Moderate EA	0.0427283
HCC15_LUNG	Lung NSCLC	XIRP2	Random	Moderate EA	0.199917
HCC15_LUNG	Lung NSCLC	CISD1	Random	Moderate EA	0.484647
HCC15_LUNG	Lung NSCLC	SLC13A1	Random	Moderate EA	0.630801
HCC15_LUNG	Lung NSCLC	RANBP2	Random	Moderate EA	-0.147589
MDST8_LARGE_INTESTINE	Colon Cancer	UBR3	Random	Moderate EA	-0.15644
MDST8_LARGE_INTESTINE	Colon Cancer	ERCC5	Random	Moderate EA	-0.0235949
CAL51_BREAST	Breast Cancer	SLC2A5	Random	Moderate EA	-0.182222
[truncated: 5,105 more rows]
