# Supplementary material for: A general calculus of fitness landscapes finds genes under selection in cancers
Source: HighWire-hosted journal article supplement (doi:10.1101/gr.275811.121), 2022-03-17
Supplement: Supplemental_Table_S13.xlsx [file Supplemental_Table_S13.xlsx]

## Sheet: Table_S13
Table S13. HNSC CI predictions
Gene	Full Name	Type	TSG/OG	COSMIC v79	Davoli 2013	Kandoth 2013	Vogelstein 2013	Lawrence 2014	cancer association reference	Pathway	Function
CASP8	caspase 8	peptidase	TSG	X	X		X	X	PMID: 19111387	apoptosis	programmed cell death through the death receptor pathway
TGFBR2	transforming growth factor beta receptor 2	kinase	TSG	X	X	X		X	PMID: 20495575, PMID: 16702406	apoptosis	cell growth inhibition and apoptosis; loss of TGFBR2 promotes metastasis
CDKN2A	cyclin dependent kinase inhibitor 2A	transcription regulator	TSG	X	X	X	X	X	PMID: 21798893	cell cycle/survival	encodes genes (p14ARF/p16INK4a) that regulating cell cycle progression through TP53 (p14ARF) or pRB pathway (p16INK4a)
NF2	neurofibromin 2	other	TSG	X	X		X		PMID: 22750751	cell cycle/survival	functions as a tumor suppressor through impacting mechanisms related to proliferation, apoptosis, survival, motility, adhesion, and invasion
PIK3CA	phosphatidylinositol-4,5-bisphosphate 3-kinase catalytic subunit alpha	kinase	OG	X	X	X	X	X	PMID: 15016963	cell cycle/survival	important regulators of cellular growth, transformation, adhesion, apoptosis, survival and motility
PTEN	phosphatase and tensin homolog	phosphatase	TSG	X	X	X	X	X	PMID: 10200246	cell cycle/survival	negatively regulates PI3K pathway
RB1	RB transcriptional corepressor 1	transcription regulator	TSG	X	X	X	X	X	PMID: 18650841	cell cycle/survival	negative regulator of the cell cycle
TP53	tumor protein p53	transcription regulator	TSG	X	X	X	X	X	PMID: 1377002	cell cycle/survival	plays key role in various cellular processes, primarily in cell cycle regulation
HRAS	HRas proto-oncogene, GTPase	enzyme	OG	X	X		X	X	PMID: 21798893	cell proliferation	regulates a wide variety of signaling pathways, including the mitogen-activated protein kinase (MAPK) pathway, which is implicated in cell proliferation and the phosphatidylinositol 3-kinase (PI3K) pathway, which is associated with cellular transformation
MAPK1	mitogen-activated protein kinase 1	kinase	OG	X	X				PMID: 17496922	cell proliferation	a component of the mitogen activated signaling (MAPK) pathway downstream of RAS, RAF and MEK.
RAC1	ras-related C3 botulinum toxin substrate 1 (rho family, small GTP binding protein Rac1)	enzyme	OG	X	X			X	PMID: 18443222	cell proliferation	a member of the Rho family of small GTPases acting as a signalling molecule regulating various cellular processes, including cell division, proliferation, differentiation, survival, motility, vesicle transport, nuclear assembly and control of cytoskeleton
CYLD	CYLD lysine 63 deubiquitinase	transcription regulator	TSG	X	X		X		PMID: 19373246	cell proliferation/survival	deubiquitinases CYLD functions as a tumor suppressor that inhibits NF-KB activation
NFE2L2	nuclear factor, erythroid 2 like 2	transcription regulator	OG	X	X	X	X	X	PMID: 22810811	cell stress	a transcriptional activator regulating genes that confer the oxidative damage and chemotherapy resistance to cancer cells
FAT1	FAT atypical cadherin 1	other	TSG	X	X			X	PMID: 23354438, PMID: 21617878	differentiation	tumor suppressor that negatively regulates the Wnt signaling pathway; controls cell migration and invasion
FBXW7	F-box and WD repeat domain containing 7	transcription regulator	TSG	X	X	X	X	X	PMID: 18094723	differentiation	links to squamous cell differentiation and is targeted for degradation by ubiquitin ligase FBXW7
NOTCH1	notch 1	transcription regulator	TSG	X		X	X	X	PMID: 21798897	differentiation	links to squamous cell differentiation and is targeted for degradation by ubiquitin ligase FBXW7
NOTCH2	notch 2	transcription regulator	TSG	X	X		X		PMID: 25303977	differentiation	squamous differentiation
ARID2	AT-rich interaction domain 2	transcription regulator	TSG	X	X		X	X	PMID: 21822264	epigenetic regulators	chromatin remodeling gene; part of SWI/SNF complexes that modulate transcription by remodeling nucleosomes; known tumor suppressor gene in hepatocellular carcinoma
CREBBP	CREB binding protein	transcription regulator	TSG	X	X		X	X	PMID: 26603525	epigenetic regulators	histone acetyltransferase facilitates remodeling of chromatin into a relaxed state. Frequently mutated in multiple cancers
EP300	E1A binding protein p300	transcription regulator	TSG	X	X	X	X	X	PMID: 10700188	epigenetic regulators	regulates transcription of genes that are associated with cell proliferation and division via chromatin remodeling
KMT2D	lysine methyltransferase 2D	transcription regulator	TSG	X	X	X	X	X	PMID: 25998713	epigenetic regulators	histone methyltransferase KMT2D (also known as MLL2) regulates gene expression through epigenetic transcriptional activation
RASA1	RAS p21 protein activator 1	transporter	TSG		X			X	PMID: 24443565	cell proliferation	acting as a suppressor of RAS function
CUL3	cullin 3	enzyme	TSG						PMID: 24596130	cell stress	down-regulate NFE2L2 and the disruption of such adaptor-substrate recognition promotes malignancy and is associated with poor prognosis in head and neck cancer
UPF2	UPF2 regulator of nonsense transcripts homolog (yeast)	other	OG						PMID: 25744026	cell stress	Crucial components of the nonsense-mediated RNA decay (NMD) mechanism. the inhibition of NMD observed during apoptosis in cultured cells also extends to tissues undergoing apoptosis in vivo
AJUBA	ajuba LIM protein	transcription regulator	TSG			X		X	PMID: 17621269	differentiation	negatively regulate the Wnt signaling pathway; associate with cell proliferation and differentiation
KDF1	keratinocyte differentiation factor 1	other	TSG						PMID: 24075906	differentiation	KDF1 (Keratinocyte Differentiation Factor 1): block proliferation and promote differentiation; plays a role in the regulation of the epidermis formation during early development
PDZRN4	PDZ domain containing ring finger 4	other	TSG						PMID: 11782429, PMID: 16002321	differentiation	RING finger and PDZ domain containing protein that interacts with the cell fate determinant Numb (NOTCH)
ZNF750	zinc finger protein 750	transcription regulator	TSG					X	PMID: 27819679	differentiation	drives epidermal differentiation in squamous-cell carcinoma
HNRNPUL1	heterogeneous nuclear ribonucleoprotein U like 1	other	TSG						PMID: 22365830	DNA damage	hnRNPUL1 and -2 act downstream of MRN and CtIP by facilitating the recruitment of BLM helicase to DNA breaks
SCAF4	SR-related CTD associated factor 4	other	TSG						PMID: 27184836	DNA damage	a member of the arginine/serine-rich splicing factor family; were markedly recruited to Cockayne syndrome B protein after UV irradiation (response to DNA damage); act to physically and functionally link transcription and pre-mRNA processing
KMT2B	lysine methyltransferase 2B	transcription regulator	TSG			X		X	PMID: 23358417	epigenetic regulators	histone methyltransferase KMT2B: crucial components for establishing and maintaining the transcriptionally active and unmethylated state of CpG island promoters
NSD1	nuclear receptor binding SET domain protein 1	transcription regulator	TSG			X		X	PMID: 25631445	epigenetic regulators	NSD1 is a methyltransferase. Enrichment in loss-of-function mutation in NSD1 suggesting it might function as a tumor suppressor in HNSC
HLA-B	major histocompatibility complex, class I, B	transmembrane receptor	TSG					X	PMID: 18497950	immunosurveillance	mediates immunological surveillance of tumor cells
EPHA2	EPH receptor A2	kinase	TSG		X			X	PMID: 22086185	metastasis	Downregulation of EphA2 suppresses proliferation, migration, invasion of squamous-cell carcinoma of the head and neck
THSD7A	thrombospondin type 1 domain containing 7A	other	TSG						PMID: 22194972	metastasis	promoting endothelial cell migration during angiogenesis via FAK-dependent mechanism
MYH9	myosin heavy chain 9	enzyme	TSG						PMID: 24436421	TP53 stabilization	tumor suppressor that regulating TP53 stabilization and nuclear localization
AHDC1	AT-hook DNA binding motif containing 1	other	TSG								in vivo targets for AHDC1 binding are largely unknown; truncating variants in AHDC1 are associated with intellectual disability and are primarily associated with a neurodevelopmental phenotype
C12orf42	chromosome 12 open reading frame 42	other	TSG
CD300E	CD300e molecule	other	TSG								CD300e functions as an activating receptor capable of regulating the innate immune response in myeloid cells
FFAR2	free fatty acid receptor 2	G-protein coupled receptor	TSG						PMID: 19780758		tumor-promoting activity among digestivetract cancers
FNBP4	formin binding protein 4	other	TSG								Formin binding protein 4. Formin family proteins regulates cytoskeletal dynamics
JPH1	junctophilin 1	other	TSG								Link the plasma membrane with the endoplasmic or sarcoplasmic reticulum
OR2T35	olfactory receptor family 2 subfamily T member 2	G-protein coupled receptor	TSG								olfactory receptor
SLC2A13	solute carrier family 2 member 13	transporter	TSG								H(+)-myo-inositol cotransporter.
VAMP1	vesicle associated membrane protein 1	transporter	TSG								involved in the docking and/or fusion of synaptic vesicles with the presynaptic membrane.
Red: unique-to-CI genes
