# Supplementary material for: A general calculus of fitness landscapes finds genes under selection in cancers
Source: HighWire-hosted journal article supplement (doi:10.1101/gr.275811.121), 2022-03-17
Supplement: Supplemental_Table_S14.xlsx [file Supplemental_Table_S14.xlsx]

## Sheet: Table_S14
Table S14. CI predicted oncogenes
Gene	Entrez Gene Name	Location	Type(s)	Drug	PubMed ID	Note	Status		Status	# of genes
ACTG1	actin gamma 1	Cytoplasm	other						directly target	9
AK9	adenylate kinase 9	Nucleus	kinase						targets general class of molecules or a specific context	4
ARHGAP5	Rho GTPase activating protein 5	Cytoplasm	enzyme
ASB11	ankyrin repeat and SOCS box containing 11	Nucleus	transcription regulator
ATF7IP	activating transcription factor 7 interacting protein	Nucleus	transcription regulator
CCDC82	coiled-coil domain containing 82	Other	other
CEL	carboxyl ester lipase	Extracellular Space	enzyme	tetrahydrolipstatin (THL;Orlistat)	PMID: 27067293		directly target
COL19A1	collagen type XIX alpha 1 chain	Extracellular Space	other
COL4A3	collagen type IV alpha 3 chain	Extracellular Space	other
COL4A4	collagen type IV alpha 4 chain	Extracellular Space	other
COL8A1	collagen type VIII alpha 1 chain	Extracellular Space	other
CSMD3	CUB and Sushi multiple domains 3	Plasma Membrane	enzyme
DACH1	dachshund family transcription factor 1	Nucleus	transcription regulator
DACH2	dachshund family transcription factor 2	Nucleus	other
DCX	doublecortin	Cytoplasm	other
DDX50	DExD-box helicase 50	Nucleus	enzyme
DYNAP	dynactin associated protein	Other	other	Ergosterol-related compounds	PMID: 20978158	Induce dynAP-dependent apoptosis of human cancer cells	directly target
DYRK1A	dual specificity tyrosine phosphorylation regulated kinase 1A	Nucleus	kinase	AZ191; Harmine	PMID: 27796319; PMID: 24134204	AZ191 is a potent and selective DYRK1B inhibitor	directly target
EEF1A1	eukaryotic translation elongation factor 1 alpha 1	Cytoplasm	translation regulator	Nannocystin A; Didemnin B	PMID: 27598405; PMID: 26179970; PMID: 26102086		directly target
EIF1AX	eukaryotic translation initiation factor 1A, X-linked	Cytoplasm	translation regulator
FAM122A	family with sequence similarity 122A	Extracellular Space	other
FAM98C	family with sequence similarity 98 member C	Other	other
FBXL17	F-box and leucine rich repeat protein 17	Other	other	MLN4924	PMID: 27063292	target upstream with Neddylation inhibitor MLN4924	targets general class of molecules or a specific context
FOXJ3	forkhead box J3	Nucleus	transcription regulator
HAX1	HCLS1 associated protein X-1	Cytoplasm	other
HECTD4	HECT domain E3 ubiquitin protein ligase 4	Nucleus	other	Heclin	PMID: 25385595		targets general class of molecules or a specific context
HS6ST1	heparan sulfate 6-O-sulfotransferase 1	Plasma Membrane	enzyme
HTR1E	5-hydroxytryptamine receptor 1E	Plasma Membrane	G-protein coupled receptor	Theoretically possible; none
IFFO1	intermediate filament family orphan 1	Other	other
INMT	indolethylamine N-methyltransferase	Cytoplasm	enzyme
KIAA0907	KIAA0907	Nucleus	other
KIF21A	kinesin family member 21A	Cytoplasm	other
KLF5	Kruppel like factor 5	Nucleus	transcription regulator	ML264	PMID: 26621868; PMID: 23762940	potently inhibits growth of colorectal cancer	directly target
LAMTOR2	late endosomal/lysosomal adaptor, MAPK and MTOR activator 2	Cytoplasm	other
LIN7A	lin-7 homolog A, crumbs cell polarity complex component	Plasma Membrane	other
MARCH11	membrane associated ring-CH-type finger 11	Other	other	SKP2 inhibitors like compounds	PMID: 23911321; PMID: 23261596	suppresses Skp2 E3 ligase activity	targets general class of molecules or a specific context
MEPCE	methylphosphate capping enzyme	Other	enzyme
MEX3C	mex-3 RNA binding family member C	Cytoplasm	other
MICU3	mitochondrial calcium uptake family member 3	Other	other	RU360	PMID: 28208618	inhibitor of mitochondrial calcuim uptake	directly target
MSL3	male-specific lethal 3 homolog (Drosophila)	Nucleus	transcription regulator
NDUFA10	NADH:ubiquinone oxidoreductase subunit A10	Cytoplasm	transporter
NONO	non-POU domain containing, octamer-binding	Nucleus	other
NOSTRIN	nitric oxide synthase trafficking	Cytoplasm	transcription regulator
NRIP1	nuclear receptor interacting protein 1	Nucleus	transcription regulator
OR13D1	olfactory receptor family 13 subfamily D member 1	Plasma Membrane	G-protein coupled receptor
OR51A4	olfactory receptor family 51 subfamily A member 4	Plasma Membrane	other
PCGF2	polycomb group ring finger 2	Nucleus	transcription regulator
PDE10A	phosphodiesterase 10A	Cytoplasm	enzyme	PF-2545920	PMID: 26713600	inhibits colon tumor cell growth; used to treat schizophrenia	directly target
PLCL1	phospholipase C like 1	Cytoplasm	enzyme
POU4F1	POU class 4 homeobox 1	Nucleus	transcription regulator
PPP2R2B	protein phosphatase 2 regulatory subunit Bbeta	Cytoplasm	phosphatase
PURG	purine rich element binding protein G	Other	other
RBP1	retinol binding protein 1	Extracellular Space	transporter
REV3L	REV3 like, DNA directed polymerase zeta catalytic subunit	Nucleus	enzyme
RGL2	ral guanine nucleotide dissociation stimulator like 2	Cytoplasm	other	pan-RalGEF inhibitor C4		inhibits Ras-driven tumor cells (developed at University of Louisville)	targets general class of molecules or a specific context
RQCD1	CCR4-NOT transcription complex subunit 9	Cytoplasm	other
SLC25A2	solute carrier family 25 member 2	Cytoplasm	transporter
SMARCA1	SWI/SNF related, matrix associated, actin dependent regulator of chromatin, subfamily a, member 1	Nucleus	transcription regulator
SMTN	smoothelin	Extracellular Space	other
SOS2	SOS Ras/Rho guanine nucleotide exchange factor 2	Cytoplasm	other
STAU2	staufen double-stranded RNA binding protein 2	Cytoplasm	other
TEP1	telomerase associated protein 1	Nucleus	enzyme	Imetelstat (GRN163L)	PMID: 28270692	telomerase inhibitor,clinical activity in myeloproliferative neoplasms and in solid tumors	directly target
TRAT1	T-cell receptor associated transmembrane adaptor 1	Plasma Membrane	kinase		PMID: 17070077	Acts as a chaperone to modulate expression of the CTLA-4
TSC22D1	TSC22 domain family member 1	Nucleus	transcription regulator
UPF2	UPF2 regulator of nonsense transcripts homolog (yeast)	Cytoplasm	other	Pateamine A	PMID: 19570977	Inhibit nonsense-mediated mRNA decay	directly target
ZBTB20	zinc finger and BTB domain containing 20	Nucleus	transcription regulator
ZNF211	zinc finger protein 211	Nucleus	transcription regulator
ZNF727	zinc finger protein 727	Other	other
ZNF814	zinc finger protein 814	Other	other
ZNF862	zinc finger protein 862	Other	other
